# Supplementary material for: Transcriptome-Based Modeling Reveals that Oxidative Stress Induces Modulation of the AtfA-Dependent Signaling Networks in Aspergillus nidulans
Source: Int J Genomics. 2017 Jul 9;2017:6923849. doi: 10.1155/2017/6923849 (PMC5523550; doi:10.1155/2017/6923849)
Supplement: Supplementary file 2 [file 6923849.f2.xls]

## Sheet: STable2
Supplementary Table 2		Stress responsiveness of genes showing altered regulation by deleting atfA.
Control strain:		Genes regulated in							Not stress responsive		Number of genes:
		MSB stress only	tBOOH stress only	Diamide stress only	MSB and tBOOH stresses	MSB and Diamide stresses	Diamide and tBOOH stresses	MSB, Diamide and tBOOH stresses
DatfA mutant:
Genes regulated in	MSB stress only		70	3	58	10	6	5	297		449
	tBOOH stress only	33		5	83	2	6	13	161		303
	Diamide stress only	17	11		2	38	14	8	136		226
	MSB and tBOOH stresses	10	120	0		1	5	14	21		171
	MSB and Diamide stresses	3	4	10	1		8	18	6		50
	Diamide and tBOOH stresses	17	10	19	21	20		19	62		168
	MSB, Diamide and tBOOH stresses	8	52	2	19	3	47		21		152
Not stress responsive		484	262	156	95	20	17	11			1045
	Number of genes:	572	529	195	279	94	103	88	704
Genes lost or gained their co-regulated nature			240
Genes lost or gained their stress responsive nature			1749
tBOOH dependent genes gained MSB dependence			312
tBOOH dependent genes gained diamide dependence			120
MSB dependent genes gained tBOOH dependence			94
MSB dependent genes gained diamide dependence			88
diamide dependent genes gained MSB dependence			81
diamide dependent genes gained tBOOH dependence			52
Genes lost their MSB stress dependnece:		see Fig. 2C	883
Genes lost their tBOOH stress dependence:		see Fig. 2C	590
Genes lost their diamide stress dependence		see Fig. 2C	274
