# Supplementary material for: Transcriptome-Based Modeling Reveals that Oxidative Stress Induces Modulation of the AtfA-Dependent Signaling Networks in Aspergillus nidulans
Source: Int J Genomics. 2017 Jul 9;2017:6923849. doi: 10.1155/2017/6923849 (PMC5523550; doi:10.1155/2017/6923849)
Supplement: Supplementary file 3 [file 6923849.f3.xls]

## Sheet: Control strain
Supplementary Table 3		Gene enrichment analysis of stress responsive genes.				Sheet 1 - Control strain (up- and down-regulated gene groups)
Strain:	control
Stress:	MSB
Group:	up-regulated genes
1. AspGD Gene Ontology Term Finder (http://www.aspergillusgenome.org/cgi-bin/GO/goTermFinder)
GOID	GO_term	Cluster frequency	Background frequency	Corrected P-value	False discovery rate	Gene(s) annotated to the term	Directly Annotated GOID List
16226	iron-sulfur cluster assembly	9 out of 625 genes, 1.4%	19 out of 10340 background genes, 0.2%	0.00036	0	AN0447:AN10012:AN11060:AN2155:AN2508:AN3632:AN4655:AN5953:AN8485	6534:9102:2143:44571:70903:6879:6915:97428:16226:2098:6546
31163	metallo-sulfur cluster assembly	9 out of 625 genes, 1.4%	19 out of 10340 background genes, 0.2%	0.00036	0	AN0447:AN10012:AN11060:AN2155:AN2508:AN3632:AN4655:AN5953:AN8485	6534:9102:2143:44571:70903:6879:6915:97428:16226:2098:6546
2. FungiFun (https://elbe.hki-jena.de/fungifun/fungifun.php)
FunCat ID	FunCat description	FunCat main category	Gene ID(s)	Exact p-value	Adjusted p-value	# genes / category	# genes / input
20.01.27	drug/toxin transport	Cellular transport, transport facilitation and transport routes	ANIA_00225 | ANIA_00297 | ANIA_00498 | ANIA_00601 | ANIA_01423 | ANIA_02531 | ANIA_02625 | ANIA_02707 | ANIA_04180 | ANIA_05140 | ANIA_05369 | ANIA_05370 | ANIA_06237 | ANIA_06477 | ANIA_06581 | ANIA_07149 | ANIA_07729 | ANIA_08095 | ANIA_08340 | ANIA_08365 | ANIA_08459 | ANIA_08489 | ANIA_08621 | ANIA_09165 | ANIA_09219 | ANIA_09370 | ANIA_10862	3.6921e-7	9.7733e-05	27 / 167	27 / 636
20.03.25	ABC transporters	Cellular transport, transport facilitation and transport routes	ANIA_00225 | ANIA_02052 | ANIA_02625 | ANIA_02707 | ANIA_04180 | ANIA_05370 | ANIA_06237 | ANIA_06512 | ANIA_06581 | ANIA_06996 | ANIA_07729 | ANIA_08095 | ANIA_08365 | ANIA_08459 | ANIA_08489 | ANIA_08733 | ANIA_09370 | ANIA_10862	5.2404e-7	9.7733e-05	18 / 84	18 / 636
32.07.05	detoxification by export	Cell rescue, defense and virulence	ANIA_00498 | ANIA_00601 | ANIA_02531 | ANIA_02625 | ANIA_02707 | ANIA_04180 | ANIA_05369 | ANIA_05370 | ANIA_06237 | ANIA_06477 | ANIA_06581 | ANIA_07729 | ANIA_08095 | ANIA_08340 | ANIA_08459 | ANIA_08489 | ANIA_08621 | ANIA_09165 | ANIA_09370 | ANIA_10862	5.2222e-05	0.006493	20 / 136	20 / 636
01.01.11.04.01	biosynthesis of leucine	Metabolism	ANIA_00385 | ANIA_02526 | ANIA_02793 | ANIA_04323 | ANIA_05886 | ANIA_05957 | ANIA_07876	0.00017271	0.016105	7 / 23	7 / 636
20.09.16.01	Type I protein secretion system (ABC-type transport systems)	Cellular transport, transport facilitation and transport routes	ANIA_04180 | ANIA_05370 | ANIA_06237 | ANIA_06512 | ANIA_06581 | ANIA_08095 | ANIA_08459 | ANIA_08489	0.00026961	0.020113	8 / 32	8 / 636
32.07.07	oxygen and radical detoxification	Cell rescue, defense and virulence	ANIA_00932 | ANIA_02846 | ANIA_03581 | ANIA_04113 | ANIA_05440 | ANIA_06820 | ANIA_10220	0.00051597	0.028006	7 / 27	7 / 636
01.01.03.05	metabolism of arginine	Metabolism	ANIA_01730 | ANIA_02531 | ANIA_02901 | ANIA_09013	0.00054659	0.028006	4 / 8	4 / 636
01.01.11.04.02	degradation of leucine	Metabolism	ANIA_00385 | ANIA_04323 | ANIA_05886 | ANIA_05957 | ANIA_07876 | ANIA_09131 | ANIA_10783	0.00065568	0.028006	7 / 28	7 / 636
01.01.11.02.02	degradation of isoleucine	Metabolism	ANIA_00385 | ANIA_04323 | ANIA_05957 | ANIA_07876 | ANIA_10783	0.00067575	0.028006	5 / 14	5 / 636
2.45	energy conversion and regeneration	Energy	ANIA_00330 | ANIA_01840 | ANIA_01882 | ANIA_05228 | ANIA_06167 | ANIA_06753 | ANIA_06772 | ANIA_08360	0.00077577	0.028936	8 / 37	8 / 636
20.09.16	cellular export and secretion	Cellular transport, transport facilitation and transport routes	ANIA_00225 | ANIA_00498 | ANIA_01423 | ANIA_02531 | ANIA_02625 | ANIA_02707 | ANIA_02822 | ANIA_03357 | ANIA_04180 | ANIA_04914 | ANIA_05369 | ANIA_05370 | ANIA_06477 | ANIA_06718 | ANIA_08095 | ANIA_08340 | ANIA_08459 | ANIA_08621 | ANIA_09165 | ANIA_09219 | ANIA_09370 | ANIA_10862	0.00088449	0.029992	22 / 192	22 / 636
01.01.11.03.02	degradation of valine	Metabolism	ANIA_00385 | ANIA_04323 | ANIA_05957 | ANIA_07876 | ANIA_10783	0.00096793	0.030086	5 / 15	5 / 636
32.07	detoxification	Cell rescue, defense and virulence	ANIA_00498 | ANIA_00601 | ANIA_00932 | ANIA_01423 | ANIA_02625 | ANIA_02707 | ANIA_03150 | ANIA_04912 | ANIA_05369 | ANIA_05440 | ANIA_06045 | ANIA_07149 | ANIA_07199 | ANIA_07567 | ANIA_07729 | ANIA_07823 | ANIA_08365 | ANIA_08489 | ANIA_08621 | ANIA_09282 | ANIA_09370 | ANIA_10220 | ANIA_10862	0.0014394	0.038785	23 / 212	23 / 636
01.01.09.02.02	degradation of serine	Metabolism	ANIA_02525 | ANIA_07324 | ANIA_08058 | ANIA_08449	0.0015	0.038785	4 / 10	4 / 636
01.01.11.03	metabolism of valine	Metabolism	ANIA_04323 | ANIA_05957 | ANIA_10783	0.0015597	0.038785	3 / 5	3 / 636
01.02.02.09	catabolism of nitrogenous compounds	Metabolism	ANIA_00330 | ANIA_01882 | ANIA_02901 | ANIA_06753 | ANIA_07324	0.0018191	0.042407	5 / 17	5 / 636
32.05.01.03	chemical agent resistance	Cell rescue, defense and virulence	ANIA_00601 | ANIA_02625 | ANIA_03433 | ANIA_03522 | ANIA_07149 | ANIA_08489 | ANIA_09370 | ANIA_10862	0.0021779	0.044405	8 / 43	8 / 636
32.07.07.03	glutathione conjugation reaction	Cell rescue, defense and virulence	ANIA_00932 | ANIA_04905 | ANIA_06158 | ANIA_09304	0.0022548	0.044405	4 / 11	4 / 636
01.01.11.03.01	biosynthesis of valine	Metabolism	ANIA_00385 | ANIA_02526 | ANIA_04323 | ANIA_05957 | ANIA_07876	0.0024056	0.044405	5 / 18	5 / 636
01.20.37.01	metabolism of thioredoxin, glutaredoxin, glutathion	Metabolism	ANIA_00932 | ANIA_03150 | ANIA_03581 | ANIA_03963 | ANIA_04905	0.0024056	0.044405	5 / 18	5 / 636
01.20.19.01	metabolism of porphyrins	Metabolism	ANIA_01650 | ANIA_02039 | ANIA_03234 | ANIA_03798 | ANIA_04415 | ANIA_06659	0.0025	0.044405	6 / 26	6 / 636
Strain:	control
Stress:	MSB
Group:	down-regulated genes
1. AspGD Gene Ontology Term Finder (http://www.aspergillusgenome.org/cgi-bin/GO/goTermFinder)
GOID	GO_term	Cluster frequency	Background frequency	Corrected P-value	False discovery rate	Gene(s) annotated to the term	Directly Annotated GOID List
6412	translation	69 out of 642 genes, 10.7%	199 out of 10340 background genes, 1.9%	4.2e-31	0	AN0262:AN0278:AN0433:AN0445:AN0465:AN0570:AN0776:AN0843:AN0907:AN1013:AN10182:AN10416:AN10614:AN10681:AN10740:AN1122:AN11411:AN11419:AN1166:AN12246:AN1228:AN1345:AN1964:AN2275:AN2301:AN2734:AN2980:AN3172:AN3413:AN3823:rps16:AN4073:AN4087:rpl16a:AN4222:AN4475:AN4494:AN4522:AN4594:AN4794:AN4802:AN4803:ubi1:AN4916:AN5014:AN5222:AN5441:AN5715:AN5719:AN5960:AN5979:AN5996:AN5997:AN6181:rpl3:AN6500:AN65…	469:36180:723:31929:16567:45944:42255:6414:2109:6449:27:32543:28:42274:463:30490:43558:6429:447:2182:462:2183:42254:9267:71216:2181:6412:6310:43066:45903:461:45860:1900153:6407:6450:36170:448:35690:56:372:16236
43043	peptide biosynthetic process	73 out of 642 genes, 11.4%	234 out of 10340 background genes, 2.3%	1.35e-29	0	AN0262:AN0278:AN0433:AN0445:AN0465:AN0570:AN0776:AN0843:AN0907:AN1013:AN10182:AN10416:AN10614:AN10681:AN10740:AN1122:AN11411:AN11419:AN1166:AN12246:AN1228:AN1345:AN1964:AN2275:AN2301:easA:easB:easD:AN2734:AN2980:AN3172:AN3413:AN3823:rps16:AN4073:AN4087:rpl16a:AN4222:AN4475:AN4494:AN4522:AN4594:AN4794:AN4802:AN4803:ubi1:AN4916:AN5014:AN5222:AN5441:AN5715:AN5719:AN5960:AN5979:AN5996:AN5997:AN6181:r…	1900584:469:1900809:36180:723:31929:16567:1900557:45944:42255:6414:2109:6449:1900772:27:32543:28:42274:463:30490:43558:2001310:6429:447:1900617:36146:2182:462:1900805:2183:1900815:42254:19184:55114:71216:9267:2181:45461:6412:6310:45903:19748:43066:461:45860:1900153:31505:6407:36170:6450:448:56:9405:35690:372:1900781:9847:16236:1902086
6518	peptide metabolic process	76 out of 642 genes, 11.8%	255 out of 10340 background genes, 2.5%	2.04e-29	0	AN0262:AN0278:AN0433:AN0445:AN0465:AN0570:AN0776:AN0843:AN0907:AN1013:AN10182:AN10416:AN10614:AN10681:AN10740:AN1122:AN11411:AN11419:AN1166:AN12246:AN1228:AN1345:AN1638:AN1964:AN2275:AN2301:easA:easB:easD:AN2734:AN2980:AN3172:AN3413:AN3823:rps16:AN4073:AN4087:rpl16a:AN4222:AN4282:AN4475:AN4494:AN4522:AN4594:AN4794:AN4802:AN4803:ubi1:AN4916:AN5014:AN5222:AN5441:AN5715:AN5719:AN5960:AN5979:AN5996:A…	1900584:469:1900809:36180:43171:723:31929:16567:1900557:45944:42255:6414:2109:6449:1900772:27:32543:28:42274:463:30490:43558:2001310:6429:447:1900617:36146:2182:462:1900805:2183:1900815:42254:19184:55114:71216:9267:2181:45461:6412:6310:45903:19748:43066:461:45047:45860:1900153:31505:6407:6508:36170:6450:448:56:9405:35690:6465:372:1900781:9847:16236:1902086
43604	amide biosynthetic process	78 out of 642 genes, 12.1%	290 out of 10340 background genes, 2.8%	6.95e-27	0	AN0262:AN0278:AN0433:AN0445:AN0465:aldA:AN0570:spdA:AN0776:AN0843:AN0907:AN1013:AN10182:AN10416:AN10614:AN10681:AN10740:AN1122:AN11411:AN11419:AN1166:AN12246:AN1228:AN1345:AN1689:AN1964:AN2275:AN2301:easA:easB:easD:AN2734:AN2980:AN3172:AN3413:AN3823:rps16:AN4073:AN4087:rpl16a:AN4222:AN4475:AN4494:AN4522:AN4594:AN4794:AN4802:AN4803:ubi1:AN4916:AN5014:AN5222:AN5441:AN5715:AN5719:AN5960:AN5979:AN599…	97308:723:6081:45944:9073:6449:27:9102:45991:42274:463:43558:6567:2001310:6429:447:1900617:2182:462:1900805:1900815:6067:42254:71216:55114:45461:6310:19748:43066:46187:45329:8295:19413:31505:6450:56:1900781:9847:1900584:9108:469:36180:1900809:31929:1900557:16567:71470:6414:42255:2109:1900772:32543:28:30490:6525:36146:19482:2183:19184:9267:2181:6412:45903:461:9438:45860:1900153:42318:6407:36170:44…
43603	cellular amide metabolic process	84 out of 642 genes, 13.1%	339 out of 10340 background genes, 3.3%	2.21e-26	0	AN0262:AN0278:AN0433:AN0445:AN0465:aldA:AN0570:spdA:AN0776:AN0843:AN0907:ureB:AN1013:AN10182:AN10416:AN10614:AN10681:AN10740:AN10795:AN1122:AN11411:AN11419:AN1166:AN12246:AN1228:AN1345:AN1638:AN1689:AN1964:gatA:AN2275:AN2301:easA:easB:easD:AN2734:AN2980:AN3172:AN3413:AN3823:rps16:AN4073:AN4087:rpl16a:AN4222:AN4282:AN4475:AN4494:AN4522:AN4594:AN4794:AN4802:AN4803:ubi1:AN4916:AN5014:AN5222:AN5441:A…	43171:97308:723:6081:45944:9073:6449:27:9102:45991:42274:463:43558:6567:2001310:6429:447:1900617:2182:462:1900805:43419:1900815:6067:42254:71216:55114:45461:6310:19748:43066:45047:6540:46187:45329:8295:19413:31505:6450:56:1900781:9847:1900584:6536:19556:9108:469:1900809:36180:31929:16567:1900557:43605:42255:6414:71470:2109:1900772:32543:9450:28:30490:6525:36146:19482:2183:19184:9267:2181:6412:459…
1901566	organonitrogen compound biosynthetic process	115 out of 642 genes, 17.9%	696 out of 10340 background genes, 6.7%	2.24e-20	0	AN0050:AN0067:AN0262:AN0278:AN0433:AN0445:AN0465:aldA:AN0570:manA:spdA:AN0776:mns1B:AN0843:AN0907:AN1013:AN10182:AN10416:AN10614:AN10681:riboG:AN10740:AN10981:AN11111:phenA:AN1122:AN11411:AN11419:AN1166:AN12246:AN1228:AN1271:AN1345:AN1455:oliC:AN1689:AN1964:AN2096:AN2240:AN2275:AN2293:AN2301:easA:easB:easD:AN2733:AN2734:AN2980:AN3172:AN3413:AN3431:AN3634:AN3748:AN3823:AN4058:rps16:AN4073:AN4087:r…	45861:43936:32:916:97308:6081:45944:9435:9231:27:9102:45991:31589:42274:463:48315:43558:6567:2001310:6429:1900617:6227:70791:40009:1900805:6067:42254:6486:6520:71712:45461:19748:43066:15867:1900101:30968:45329:19563:8295:6233:6450:34354:6038:9082:9847:6461:1900584:9108:6091:6240:35269:31929:16567:1900557:71470:2109:1900772:32543:30490:6525:6729:6489:2183:15793:19184:46704:9267:44011:90529:2181:64…
19538	protein metabolic process	121 out of 642 genes, 18.8%	885 out of 10340 background genes, 8.6%	1.54e-14	0	AN0262:AN0278:AN0433:AN0445:AN0465:AN0570:manA:AN0776:mns1B:cdc20:AN0843:AN0862:AN0905:AN0907:AN1013:AN10182:AN10258:AN10351:AN10416:AN10614:AN10681:AN10702:AN10740:AN10872:AN1122:AN11411:AN11419:AN1166:AN12246:AN1228:AN1345:AN1455:plkA:AN1638:AN1851:AN1904:hepA:AN1964:AN2054:bipA:AN2096:AN2237:AN2240:AN2275:AN2301:AN2366:AN2572:AN2734:mps1:AN2980:AN3172:AN3413:AN3823:nimT:sldA:rps16:AN4073:AN408…	45861:43936:32:31028:98783:6974:1900182:30071:1902426:97308:43171:44743:45944:1902424:16579:31536:97316:72480:27:1990804:72429:6281:19679:31589:42274:463:48315:43558:6429:1902542:7052:40009:36289:1990803:1902406:42254:6486:71712:6468:6306:413:45836:71459:1990813:43066:42787:34605:742:51567:15867:1900101:30968:2000060:19563:45819:1903468:1990141:15976:6450:70843:51754:36166:86:51229:6461:1901319:7…
9059	macromolecule biosynthetic process	105 out of 642 genes, 16.4%	729 out of 10340 background genes, 7.1%	8.55e-14	0	AN0228:AN0260:AN0262:AN0278:AN0433:AN0445:AN0465:AN0570:manA:AN0776:mns1B:AN0843:AN0907:AN10087:AN1013:AN10182:AN10416:AN10497:AN10614:AN10621:AN10681:AN10702:AN10740:AN10755:AN11054:AN1122:AN11411:AN11419:AN1166:AN12246:AN1228:AN1345:AN1455:AN1964:bipA:AN2096:AN2240:AN2275:AN2296:AN2301:AN2734:AN2969:AN2980:AN3033:AN3067:ugmA:AN3172:AN3413:AN3749:AN3823:rps16:AN4073:AN4087:rpl16a:AN4222:pcmA:AN4…	45861:43936:32:916:6279:45944:6270:27:48478:31589:42274:463:48315:43558:6429:7004:9272:40009:6284:42766:42254:6486:71712:43111:43066:742:15867:1900101:30968:19563:70914:6450:6038:6461:6368:44182:727:35269:31929:16567:2109:10964:42276:32543:31204:710:30490:6311:6366:6489:30466:2183:45004:15793:52559:735:6986:9267:6298:44011:6267:90529:2181:6412:6285:6616:31573:16584:70787:97359:51097:6407:36170:62…
1901564	organonitrogen compound metabolic process	175 out of 642 genes, 27.3%	1553 out of 10340 background genes, 15.0%	1.19e-13	0	AN0050:AN0067:AN0174:AN0262:AN0278:AN0357:AN0433:AN0445:AN0465:aldA:AN0570:AN0593:manA:spdA:AN0776:mns1B:cdc20:AN0843:AN0862:AN0905:AN0907:ureB:AN1013:AN10146:AN10182:AN10258:AN10351:AN10416:AN10614:AN10681:AN10702:riboG:AN10740:AN10795:AN10872:AN10981:AN11111:phenA:AN1122:AN11411:AN11419:AN1166:AN12246:AN1228:AN1271:AN1345:AN1455:cysF:plkA:oliC:AN1638:AN1689:AN1851:AN1904:hepA:acuF:AN1964:AN2054…	32:1900409:6974:1902426:43171:45944:9435:72480:72429:45991:6281:31589:463:48315:43558:6567:6429:1900617:1902542:6227:6116:70791:36289:42254:71712:45461:45836:71459:43066:42787:742:51567:15867:1900101:30968:2000060:45329:19563:8295:19441:6233:45819:70843:51754:6038:9082:6090:51229:1901319:19556:9108:6091:6240:6071:46827:31929:43605:320:6511:6527:71470:706:1990598:10696:6489:30466:10898:2183:34599:…
44267	cellular protein metabolic process	110 out of 642 genes, 17.1%	788 out of 10340 background genes, 7.6%	1.39e-13	0	AN0262:AN0278:AN0433:AN0445:AN0465:AN0570:manA:AN0776:mns1B:cdc20:AN0843:AN0862:AN0905:AN0907:AN1013:AN10182:AN10258:AN10416:AN10614:AN10681:AN10740:AN10872:AN1122:AN11411:AN11419:AN1166:AN12246:AN1228:AN1345:AN1455:plkA:AN1851:AN1904:hepA:AN1964:AN2054:bipA:AN2096:AN2240:AN2275:AN2301:AN2734:mps1:AN2980:AN3172:AN3413:AN3823:nimT:sldA:rps16:AN4073:AN4087:nimX:rpl16a:AN4222:sec13:cypB:AN4475:AN449…	32:6974:1902426:45944:72480:72429:6281:31589:463:48315:43558:6429:1902542:36289:42254:71712:45836:71459:43066:42787:742:51567:15867:1900101:30968:2000060:19563:45819:70843:51754:51229:1901319:46827:31929:320:6511:71470:706:1990598:10696:6489:30466:10898:2183:31662:2000221:32210:1990802:1934:60303:6616:10570:97359:1902408:34613:1905168:10571:9405:30307:33314:9060:43982:723:1990443:30433:30970:4354…
34645	cellular macromolecule biosynthetic process	103 out of 642 genes, 16.0%	716 out of 10340 background genes, 6.9%	1.94e-13	0	AN0228:AN0260:AN0262:AN0278:AN0433:AN0445:AN0465:AN0570:manA:AN0776:mns1B:AN0843:AN0907:AN10087:AN1013:AN10182:AN10416:AN10497:AN10614:AN10621:AN10681:AN10740:AN10755:AN11054:AN1122:AN11411:AN11419:AN1166:AN12246:AN1228:AN1345:AN1455:AN1964:bipA:AN2096:AN2240:AN2275:AN2296:AN2301:AN2734:AN2969:AN2980:AN3033:AN3067:ugmA:AN3172:AN3413:AN3749:AN3823:rps16:AN4073:AN4087:rpl16a:AN4222:pcmA:AN4475:AN44…	32:6279:45944:48478:31589:463:48315:43558:6429:7004:9272:42766:42254:71712:43066:742:15867:1900101:30968:19563:6038:44182:727:31929:42276:6366:6489:30466:2183:45004:6267:90529:6616:97359:51097:9405:33314:6012:6269:9060:723:6297:6337:30433:447:2182:70880:6303:18279:70987:6031:1990516:1902969:35822:734:61500:6414:6493:9298:6506:44275:45950:16485:16070:45903:70592:1900153:43044:7064:45861:43936:916:…
9987	cellular process	320 out of 642 genes, 49.8%	3658 out of 10340 background genes, 35.4%	7.86e-12	0	AN0050:tmpA:AN0067:AN0163:AN0174:AN0179:AN0203:AN0228:pdiB:AN0259:AN0260:AN0262:AN0278:tubA:AN0357:AN0433:AN0445:AN0465:aldA:AN0570:AN0579:AN0593:manA:mipA:spdA:AN0746:AN0776:mns1B:cdc20:AN0843:AN0862:AN0905:AN0907:niaD:rcyA:ureB:AN10087:AN1013:AN10137:AN10146:AN10182:AN10223:AN10258:mnpA:AN10351:AN10395:AN10416:AN10497:AN10614:AN10621:AN1063:AN10648:AN10681:AN10700:AN10702:AN10710:riboG:AN10740:…	32:32889:1902426:43171:45991:48478:31589:463:55085:43558:6429:7004:1900617:6227:6116:48311:6325:42766:42254:1905412:45461:43066:742:1900101:51666:30968:45329:1901919:6233:45819:44774:226:70843:6725:9082:32220:51229:7019:9108:917:6662:6091:6071:6033:31929:6527:32995:71470:34198:706:90295:6489:30466:10898:71168:45004:19184:31662:33168:6267:90529:1990802:1934:1903477:60303:6616:1902114:10570:23:6098…
1901576	organic substance biosynthetic process	154 out of 642 genes, 24.0%	1386 out of 10340 background genes, 13.4%	5.84e-11	0	AN0050:AN0067:AN0228:AN0259:AN0260:AN0262:AN0278:AN0433:AN0445:AN0465:aldA:AN0570:AN0579:manA:spdA:AN0776:mns1B:AN0843:AN0907:AN10087:AN1013:AN10182:AN10416:AN10497:AN10614:AN10621:AN10648:AN10681:AN10702:AN10710:riboG:AN10740:AN10755:AN10981:AN11054:AN11111:phenA:AN1122:AN11411:AN11419:AN1166:AN12246:AN1228:AN1271:AN1345:AN1455:oliC:AN1689:acuF:AN1964:bipA:AN2096:AN2240:AN2275:AN2293:AN2296:AN23…	32:45991:48478:31589:463:43558:6429:7004:1900617:6227:6116:42766:42254:45461:43066:742:1900101:30968:45329:6233:9082:9108:6091:6071:31929:71470:6489:30466:45004:19184:6267:90529:6616:9405:33314:6012:9060:43935:723:6297:6337:447:2182:6537:6303:70987:6031:19413:70317:1990516:1900781:1900809:734:19482:45950:16485:70592:6106:1900153:43044:43458:7064:45861:43936:916:6081:9231:27:45337:2001310:45454:62…
44271	cellular nitrogen compound biosynthetic process	105 out of 642 genes, 16.4%	816 out of 10340 background genes, 7.9%	2.03e-10	0	AN0067:AN0259:AN0260:AN0262:AN0278:AN0433:AN0445:AN0465:aldA:AN0570:manA:spdA:AN0776:AN0843:AN0907:AN10087:AN1013:AN10182:AN10416:AN10614:AN10681:AN10710:riboG:AN10740:AN10755:AN10981:AN11111:AN1122:AN11411:AN11419:AN1166:AN12246:AN1228:AN1271:AN1345:oliC:AN1689:AN1964:AN2275:AN2296:AN2301:easA:easB:easD:AN2733:AN2734:AN2980:AN3033:AN3067:AN3172:AN3413:AN3431:AN3634:AN3823:rps16:AN4073:AN4087:rpl…	32:45991:463:43558:6429:7004:1900617:6227:42766:42254:45461:43066:45329:6233:9108:6091:31929:71470:45004:19184:9405:33314:723:6297:6337:447:2182:6303:70987:6031:19413:1900781:1900809:734:19482:6106:1900153:43044:7064:6081:9231:27:2001310:6284:6486:6520:70914:9847:16567:1900557:10964:1900772:32543:6525:46704:9267:2181:6285:31573:16584:9228:6407:36170:372:30448:6235:9117:15986:462:1902981:70868:190…
44249	cellular biosynthetic process	149 out of 642 genes, 23.2%	1350 out of 10340 background genes, 13.1%	3.06e-10	0	AN0050:AN0067:AN0228:AN0259:AN0260:AN0262:AN0278:AN0433:AN0445:AN0465:aldA:AN0570:AN0579:manA:spdA:AN0776:mns1B:AN0843:AN0907:AN10087:AN1013:AN10182:AN10416:AN10497:AN10614:AN10621:AN10648:AN10681:AN10710:riboG:AN10740:AN10755:AN10981:AN11054:AN11111:phenA:AN1122:AN11411:AN11419:AN1166:AN12246:AN1228:AN1271:AN1345:AN1455:oliC:AN1689:AN1964:bipA:AN2096:AN2240:AN2275:AN2293:AN2296:AN2301:easA:easB:…	32:45991:48478:31589:463:43558:6429:7004:1900617:6227:42766:42254:45461:43066:742:1900101:30968:45329:6233:9082:9108:6091:31929:71470:6489:30466:45004:19184:6267:90529:6616:9405:33314:6012:9060:43935:723:6297:6337:447:2182:6537:6303:70987:6031:19413:70317:1990516:1900781:1900809:734:19482:45950:16485:70592:6106:1900153:43044:7064:45861:43936:916:6081:9231:27:45337:2001310:6284:6486:6520:70914:159…
9058	biosynthetic process	156 out of 642 genes, 24.3%	1472 out of 10340 background genes, 14.2%	2.13e-09	0	AN0050:AN0067:AN0228:AN0259:AN0260:AN0262:AN0278:AN0433:AN0445:AN0465:aldA:AN0570:AN0579:manA:spdA:AN0776:mns1B:AN0843:AN0907:AN10087:AN1013:AN10182:AN10416:AN10497:AN10614:AN10621:AN10648:AN10681:AN10702:AN10710:riboG:AN10740:AN10755:AN10981:AN11054:AN11111:phenA:AN1122:AN11411:AN11419:AN1166:AN12246:AN1228:AN1271:AN1345:AN1455:oliC:AN1689:acuF:AN1964:bipA:AN2096:AN2240:AN2275:AN2293:AN2296:AN23…	32:45991:48478:31589:463:43558:6429:7004:1900617:6227:6116:42766:42254:45461:43066:742:1900101:30968:45329:6233:9082:9108:6091:6071:31929:71470:6489:30466:45004:19184:6267:90529:6616:9405:33314:6012:9060:43935:723:6297:6337:447:2182:6537:6303:70987:6031:19413:70317:1990516:1900781:1900809:734:19482:45950:16485:70592:6106:1900153:43044:43458:7064:45861:43936:916:6081:9231:27:45337:2001310:45454:62…
70	mitotic sister chromatid segregation	23 out of 642 genes, 3.6%	66 out of 10340 background genes, 0.6%	4.23e-09	0	mipA:cdc20:AN10137:benA:plkA:hepA:AN2128:AN2862:AN2963:AN3067:AN3124:sldA:nimX:kipB:cdcA:top2:AN5815:smcB:klpA:sudA:AN6600:bimD:AN8187	6325:1905412:742:45819:51229:7019:71470:706:30466:10898:71168:45004:1990802:60303:10570:35082:1905168:10571:30307:33314:71963:743:43935:31578:6297:6348:44878:35853:6303:1902845:34501:45875:70317:35308:61171:51447:1902846:1904537:31031:30989:1990801:1990139:1902002:22:72370:7064:7093:43936:1900182:30071:1902424:31536:90561:6284:1902440:6306:1990942:6265:33316:30473:7059:82:10964:7076:2000817:19030…
819	sister chromatid segregation	24 out of 642 genes, 3.7%	72 out of 10340 background genes, 0.7%	4.3e-09	0	mipA:cdc20:AN10137:benA:plkA:hepA:AN2128:AN2862:AN2963:AN2969:AN3067:AN3124:sldA:nimX:kipB:cdcA:top2:AN5815:smcB:klpA:sudA:AN6600:bimD:AN8187	6325:1905412:742:45819:51229:7019:71470:706:30466:10898:71168:45004:1990802:60303:10570:35082:1905168:10571:30307:33314:71963:743:43935:31578:6297:6348:44878:35853:6303:1902845:34501:45875:70317:35308:61171:51447:1902846:1904537:31031:30989:1990801:1990139:1902002:22:72370:7064:7093:43936:1900182:30071:1902424:31536:90561:6284:1902440:6306:70914:1990942:6265:33316:30473:7059:82:10964:7076:2000817…
70925	organelle assembly	26 out of 642 genes, 4.0%	85 out of 10340 background genes, 0.8%	5.08e-09	0	AN0262:mipA:AN1013:AN1166:benA:aspD:plkA:AN2128:AN2734:AN2862:AN3172:nimX:AN4475:kipB:myoB:ubi1:AN5222:AN5715:AN5960:AN5979:rpl3:klpA:AN6632:aspC:AN8187:AN8856	742:45819:7019:6033:706:10898:1990802:60303:10570:70783:35082:1905168:10571:9405:30307:71963:743:31578:447:44878:1902845:45875:70317:35308:61171:51447:1904537:31031:30989:1990801:1902404:1990139:40023:1902002:22:1900153:7064:7093:43936:1900182:30071:1902424:27:90561:1990942:30473:7059:16567:82:1903087:9267:7130:2181:1902850:6407:36170:920:31534:30448:1990820:462:61641:10971:51446:1904519:7017:181…
1903047	mitotic cell cycle process	42 out of 642 genes, 6.5%	206 out of 10340 background genes, 2.0%	5.63e-09	0	AN0228:mipA:cdc20:AN10137:AN10755:benA:aspD:plkA:hepA:AN2128:mad2:AN2686:rho4:AN2862:AN2963:AN2969:AN3067:AN3124:nimT:sldA:nimX:kipB:aspA:AN4685:myoB:cdcA:top2:AN5676:tpmA:AN5815:smcB:klpA:sudA:AN6600:nuvG:AN6732:AN7007:bimD:aspC:AN8187:bimB:AN9463	48478:6325:1905412:742:51666:45819:44774:32220:51229:7019:917:6033:71470:706:30466:10898:71168:45004:31662:6267:1990802:1934:1903477:60303:10570:70783:35082:1905168:10571:9405:30307:33314:71963:743:43935:723:1990443:31578:6297:6348:44878:35853:43087:6303:87:1902845:34501:45875:70317:35308:61171:1903478:734:51447:1902846:1904537:31031:30989:1990801:31991:45950:1902404:1990139:40023:1902002:22:7237…
51029	rRNA transport	10 out of 642 genes, 1.6%	11 out of 10340 background genes, 0.1%	1.07e-08	0	AN0843:AN3172:AN3413:AN3706:rps16:AN4087:AN5441:AN5715:AN5997:AN6632	447:1900153:2181:6407:469:42255:28:461:45903:42274:30490:6412:56
6407	rRNA export from nucleus	10 out of 642 genes, 1.6%	11 out of 10340 background genes, 0.1%	1.07e-08	0	AN0843:AN3172:AN3413:AN3706:rps16:AN4087:AN5441:AN5715:AN5997:AN6632	447:1900153:2181:6407:469:42255:28:461:45903:42274:30490:6412:56
278	mitotic cell cycle	42 out of 642 genes, 6.5%	210 out of 10340 background genes, 2.0%	1.09e-08	0	AN0228:mipA:cdc20:AN10137:AN10755:benA:aspD:plkA:hepA:AN2128:mad2:AN2686:rho4:AN2862:AN2963:AN2969:AN3067:AN3124:nimT:sldA:nimX:kipB:aspA:AN4685:myoB:cdcA:top2:AN5676:tpmA:AN5815:smcB:klpA:sudA:AN6600:nuvG:AN6732:AN7007:bimD:aspC:AN8187:bimB:AN9463	48478:6325:1905412:742:51666:45819:44774:32220:51229:7019:917:6033:71470:706:30466:10898:71168:45004:31662:6267:1990802:1934:1903477:60303:10570:70783:35082:1905168:10571:9405:30307:33314:71963:743:43935:723:1990443:31578:6297:6348:44878:35853:43087:6303:87:1902845:34501:45875:70317:35308:61171:1903478:734:51447:1902846:1904537:31031:30989:1990801:31991:45950:1902404:1990139:40023:1902002:22:7237…
6807	nitrogen compound metabolic process	216 out of 642 genes, 33.6%	2324 out of 10340 background genes, 22.5%	1.83e-08	0	AN0050:AN0067:AN0174:AN0228:AN0259:AN0260:AN0262:AN0278:AN0357:AN0433:AN0445:AN0465:aldA:AN0570:AN0593:manA:spdA:AN0776:mns1B:cdc20:AN0843:AN0862:lamB:AN0905:AN0907:niaD:ureB:AN10087:AN1013:AN10146:AN10182:AN10258:AN10351:AN10395:AN10416:AN10497:AN10614:AN10621:AN10681:AN10702:AN10710:riboG:AN10740:AN10755:AN10795:AN10872:AN10981:AN11111:phenA:AN1122:AN11411:AN11419:AN1166:AN11853:AN12246:AN1228:…	32:1902426:43171:45991:48478:31589:463:43558:6429:7004:1900617:6227:6116:6325:42766:42254:1905412:45461:43066:742:1900101:30968:45329:1901919:6233:45819:70843:9082:51229:9108:6091:6071:31929:6527:71470:706:6489:30466:10898:71168:45004:19184:31662:33168:6267:90529:1990802:1934:60303:6616:1902114:10570:6098:96:1905168:10571:9405:30307:33314:2143:9060:43935:723:1990443:6297:6337:31086:16998:30970:44…
42254	ribosome biogenesis	38 out of 642 genes, 5.9%	181 out of 10340 background genes, 1.8%	2.41e-08	0	AN0262:AN0465:AN0776:AN0843:AN1013:AN1166:AN1228:AN1345:AN1964:AN2734:AN3172:AN3413:AN3706:AN3823:rps16:AN4087:AN4475:AN4594:AN4803:ubi1:AN4916:AN5177:AN5222:AN5441:AN5520:AN5715:AN5960:AN5979:AN5997:rpl3:AN6563:AN6632:AN6679:AN7107:AN8856:AN8870:AN9097:AN9468	463:42254:447:2182:1900153:27:1905267:16567:9267:2181:42273:6407:36170:462:469:42255:28:461:45944:6414:45903:42274:6450:2109:30490:6412:448:6449:71216:6310:56:470:36180:35690
140014	mitotic nuclear division	23 out of 642 genes, 3.6%	74 out of 10340 background genes, 0.7%	6.24e-08	0	mipA:cdc20:AN10137:benA:plkA:hepA:AN2128:AN2862:AN2963:AN3067:AN3124:sldA:nimX:kipB:cdcA:top2:AN5815:smcB:klpA:sudA:AN6600:bimD:AN8187	6325:1905412:742:45819:51229:7019:71470:706:30466:10898:71168:45004:1990802:60303:10570:35082:1905168:10571:30307:33314:71963:743:43935:31578:6297:6348:44878:35853:6303:1902845:34501:45875:70317:35308:61171:51447:1902846:1904537:31031:30989:1990801:1990139:1902002:22:72370:7064:7093:43936:1900182:30071:1902424:31536:90561:6284:1902440:6306:1990942:6265:33316:30473:7059:82:10964:7076:2000817:19030…
280	nuclear division	29 out of 642 genes, 4.5%	116 out of 10340 background genes, 1.1%	7.42e-08	0	tubA:mipA:cdc20:AN10137:AN10621:benA:AN11853:plkA:hepA:AN2128:mad2:AN2862:AN2963:copA:AN3067:AN3124:AN3749:sldA:nimX:kipB:cdcA:top2:AN5815:smcB:klpA:sudA:AN6600:bimD:AN8187	48311:6325:1905412:742:45819:44774:226:51229:7019:71470:706:30466:10898:71168:45004:1990802:60303:10570:35082:1905168:10571:30307:33314:71963:743:43935:31578:6297:6348:44878:35853:6303:1902845:34501:45875:70317:35308:61171:51447:1902846:1904537:31031:30989:1990801:1990139:1902002:22:72370:7064:7093:43936:1900182:30071:1902424:31536:90561:6284:1902440:6306:1990942:6265:33316:30473:7059:82:10964:70…
44237	cellular metabolic process	248 out of 642 genes, 38.6%	2829 out of 10340 background genes, 27.4%	1.28e-07	0	AN0050:AN0067:AN0174:AN0228:AN0259:AN0260:AN0262:AN0278:AN0357:AN0433:AN0445:AN0465:aldA:AN0570:AN0579:AN0593:manA:spdA:AN0746:AN0776:mns1B:cdc20:AN0843:AN0862:AN0905:AN0907:niaD:ureB:AN10087:AN1013:AN10146:AN10182:AN10258:AN10395:AN10416:AN10497:AN10614:AN10621:AN1063:AN10648:AN10681:AN10700:AN10702:AN10710:riboG:AN10740:AN10755:AN10795:AN10872:AN10981:AN11054:AN11111:phenA:AN1122:AN1131:AN11411…	32:1902426:43171:45991:48478:31589:463:43558:6429:7004:1900617:6227:6116:6325:42766:42254:1905412:45461:43066:742:1900101:30968:45329:1901919:6233:45819:70843:6725:9082:51229:9108:6091:6071:31929:6527:71470:706:6489:30466:10898:71168:45004:19184:31662:33168:6267:90529:1990802:1934:60303:6616:1902114:10570:23:6098:96:46835:1905168:10571:9405:30307:33314:6012:2143:9060:43935:723:1990443:5987:6297:6…
34641	cellular nitrogen compound metabolic process	152 out of 642 genes, 23.7%	1507 out of 10340 background genes, 14.6%	2.19e-07	0	AN0067:AN0228:AN0259:AN0260:AN0262:AN0278:AN0357:AN0433:AN0445:AN0465:aldA:AN0570:AN0593:manA:spdA:AN0776:AN0843:AN0907:ureB:AN10087:AN1013:AN10146:AN10182:AN10395:AN10416:AN10497:AN10614:AN10621:AN10681:AN10710:riboG:AN10740:AN10755:AN10795:AN10981:AN11111:AN1122:AN11411:AN11419:AN1166:AN11853:AN12246:AN1228:AN1271:AN1345:rsdA:oliC:AN1638:AN1689:mshA:hepA:acuF:AN1964:AN2133:gatA:AN2275:AN2293:AN…	32:43171:45991:48478:463:43558:6429:7004:1900617:6227:6116:6325:42766:42254:1905412:45461:43066:30968:45329:1901919:6233:45819:9108:6091:6071:31929:71470:706:30466:10898:71168:45004:19184:33168:6267:1990802:60303:10570:6098:1905168:10571:9405:33314:2143:43935:723:6297:6337:31086:447:2182:6348:6303:1902845:70987:6540:6031:19413:45875:70317:1990516:1900781:35308:1900809:734:51447:1903464:1904537:31…
48285	organelle fission	29 out of 642 genes, 4.5%	123 out of 10340 background genes, 1.2%	3.4e-07	0	tubA:mipA:cdc20:AN10137:AN10621:benA:AN11853:plkA:hepA:AN2128:mad2:AN2862:AN2963:copA:AN3067:AN3124:AN3749:sldA:nimX:kipB:cdcA:top2:AN5815:smcB:klpA:sudA:AN6600:bimD:AN8187	48311:6325:1905412:742:45819:44774:226:51229:7019:71470:706:30466:10898:71168:45004:1990802:60303:10570:35082:1905168:10571:30307:33314:71963:743:43935:31578:6297:6348:44878:35853:6303:1902845:34501:45875:70317:35308:61171:51447:1902846:1904537:31031:30989:1990801:1990139:1902002:22:72370:7064:7093:43936:1900182:30071:1902424:31536:90561:6284:1902440:6306:1990942:6265:33316:30473:7059:82:10964:70…
98813	nuclear chromosome segregation	24 out of 642 genes, 3.7%	88 out of 10340 background genes, 0.9%	4.94e-07	0	mipA:cdc20:AN10137:benA:plkA:hepA:AN2128:AN2862:AN2963:AN2969:AN3067:AN3124:sldA:nimX:kipB:cdcA:top2:AN5815:smcB:klpA:sudA:AN6600:bimD:AN8187	6325:1905412:742:45819:51229:7019:71470:706:30466:10898:71168:45004:1990802:60303:10570:35082:1905168:10571:30307:33314:71963:743:43935:31578:6297:6348:44878:35853:6303:1902845:34501:45875:70317:35308:61171:51447:1902846:1904537:31031:30989:1990801:1990139:1902002:22:72370:7064:7093:43936:1900182:30071:1902424:31536:90561:6284:1902440:6306:70914:1990942:6265:33316:30473:7059:82:10964:7076:2000817…
22613	ribonucleoprotein complex biogenesis	38 out of 642 genes, 5.9%	205 out of 10340 background genes, 2.0%	1.11e-06	0	AN0262:AN0465:AN0776:AN0843:AN1013:AN1166:AN1228:AN1345:AN1964:AN2734:AN3172:AN3413:AN3706:AN3823:rps16:AN4087:AN4475:AN4594:AN4803:ubi1:AN4916:AN5177:AN5222:AN5441:AN5520:AN5715:AN5960:AN5979:AN5997:rpl3:AN6563:AN6632:AN6679:AN7107:AN8856:AN8870:AN9097:AN9468	463:42254:447:2182:1900153:27:1905267:16567:9267:2181:42273:6407:36170:462:469:42255:28:461:45944:6414:45903:42274:6450:2109:30490:6412:448:6449:71216:6310:56:470:36180:35690
71704	organic substance metabolic process	261 out of 642 genes, 40.7%	3088 out of 10340 background genes, 29.9%	1.54e-06	0	AN0050:AN0067:AN0174:AN0228:pdiB:AN0259:AN0260:AN0262:AN0278:CYP680A1:AN0357:AN0433:AN0445:AN0465:aldA:AN0570:AN0579:AN0593:manA:spdA:AN0776:mns1B:cdc20:AN0843:AN0851:AN0862:AN0905:AN0907:niaD:ureB:AN10087:AN1013:AN10146:AN10182:AN10258:AN10351:AN10395:AN10416:AN10497:AN10614:AN10621:AN10648:AN10681:AN10700:AN10702:AN10710:riboG:AN10740:AN10755:AN10795:AN10872:AN10981:AN1103:AN11054:AN11111:phenA…	32:1902426:43171:45991:48478:31589:463:43558:6429:7004:1900617:6227:6116:6325:42766:42254:1905412:45461:43066:742:1900101:30968:45329:1901919:6233:45819:70843:9082:51229:9108:6662:6091:6071:31929:6527:71470:706:6489:30466:10898:71168:45004:19184:31662:33168:6267:90529:1990802:1934:60303:6616:1902114:10570:23:6098:96:8202:46835:1905168:10571:9405:30307:33314:6012:2143:9060:43935:723:1990443:5987:6…
44238	primary metabolic process	238 out of 642 genes, 37.1%	2759 out of 10340 background genes, 26.7%	2.17e-06	0	AN0050:AN0067:AN0174:AN0228:AN0259:AN0260:AN0262:AN0278:CYP680A1:AN0357:AN0433:AN0445:AN0465:aldA:AN0570:AN0579:AN0593:manA:spdA:AN0776:mns1B:cdc20:AN0843:AN0851:AN0862:AN0905:AN0907:AN10087:AN1013:AN10146:AN10182:AN10258:AN10351:AN10395:AN10416:AN10497:AN10614:AN10621:AN10648:AN10681:AN10702:AN10710:AN10740:AN10755:AN10795:AN10872:AN1103:AN11054:phenA:AN1122:AN11411:AN11419:AN1166:AN11778:AN1185…	32:1902426:43171:45991:48478:31589:463:43558:6429:7004:1900617:6227:6116:6325:42766:42254:1905412:45461:43066:742:1900101:30968:45329:1901919:6233:45819:70843:9082:51229:6091:6071:31929:6527:71470:706:6489:30466:10898:71168:45004:19184:31662:33168:6267:90529:1990802:1934:60303:6616:1902114:10570:23:6098:96:8202:46835:1905168:10571:9405:30307:33314:6012:2143:9060:43935:723:1990443:5987:6297:6631:6…
8152	metabolic process	326 out of 642 genes, 50.8%	4092 out of 10340 background genes, 39.6%	2.49e-06	0	AN0050:AN0051:AN0052:AN0054:AN0067:AN0077:AN0174:AN0179:AN0228:pdiB:AN0259:AN0260:AN0262:AN0278:CYP680A1:AN0357:AN0433:AN0445:AN0465:aldA:AN0570:AN0579:AN0593:manA:spdA:AN0746:AN0776:mns1B:cdc20:AN0843:AN0851:AN0862:lamB:AN0905:AN0907:niaD:ureB:AN10087:AN1013:AN10146:AN10182:AN10223:AN10258:AN10351:AN10395:AN10399:AN10416:AN10497:AN10602:AN10614:AN10621:AN1063:AN10648:AN10681:AN10700:AN10702:AN10…	32:1902426:43171:45991:48478:31589:463:43558:6429:7004:1900617:6227:6116:6325:42766:42254:1905412:45461:43066:742:1900101:30968:45329:1901919:6233:45819:70843:6725:9082:51229:9108:6662:6091:6071:31929:6527:71470:706:6489:30466:10898:71168:45004:19184:31662:33168:6267:90529:1990802:1934:60303:6616:1902114:10570:23:6098:96:8202:46835:1905168:10571:9405:30307:33314:6012:2143:9060:43935:723:1990443:5…
7059	chromosome segregation	24 out of 642 genes, 3.7%	96 out of 10340 background genes, 0.9%	3.41e-06	0	mipA:cdc20:AN10137:benA:plkA:hepA:AN2128:AN2862:AN2963:AN2969:AN3067:AN3124:sldA:nimX:kipB:cdcA:top2:AN5815:smcB:klpA:sudA:AN6600:bimD:AN8187	6325:1905412:742:45819:51229:7019:71470:706:30466:10898:71168:45004:1990802:60303:10570:35082:1905168:10571:30307:33314:71963:743:43935:31578:6297:6348:44878:35853:6303:1902845:34501:45875:70317:35308:61171:51447:1902846:1904537:31031:30989:1990801:1990139:1902002:22:72370:7064:7093:43936:1900182:30071:1902424:31536:90561:6284:1902440:6306:70914:1990942:6265:33316:30473:7059:82:10964:7076:2000817…
44085	cellular component biogenesis	72 out of 642 genes, 11.2%	568 out of 10340 background genes, 5.5%	4.16e-06	0	AN0228:AN0262:tubA:AN0465:manA:mipA:AN0776:AN0843:AN0862:AN1013:AN1063:AN11054:AN1166:benA:AN1228:AN1345:aspD:plkA:AN1956:AN1964:bipA:AN2128:rho4:AN2734:AN2862:ugmA:AN3172:AN3413:AN3706:AN3823:rps16:AN4087:nimX:pcmA:AN4475:kipB:AN4594:myoB:pmtB:AN4803:ubi1:AN4916:AN5177:AN5222:AN5441:AN5520:tpmA:AN5715:AN5960:AN5979:AN5997:rpl3:klpA:AN6563:AN6600:AN6632:AN6679:AN6732:tubC:chsA:AN7107:AN7426:aspC:…	32:31589:463:48311:42766:42254:742:1900101:45819:226:32220:7019:917:6091:6033:706:30466:10898:6267:90529:1990802:1903477:60303:6616:10570:70783:35082:1905168:10571:9405:30307:6012:71963:743:31578:6337:447:2182:44878:43087:7021:1902845:34501:6031:45875:70317:35308:61171:6457:1903478:51447:1904537:31031:30989:1990801:31991:1902404:1990139:40023:1902002:22:70592:1900153:43044:7064:7093:45861:43936:1…
51641	cellular localization	66 out of 642 genes, 10.3%	514 out of 10340 background genes, 5.0%	1.19e-05	0	sec23:tubA:sec61:cdc20:AN0843:AN0847:AN10137:AN10710:AN1117:AN11226:AN1154:AN1177:benA:aspD:hepA:nudK:AN2054:bipA:AN2128:AN2164:rho4:AN2862:AN2963:copA:AN3080:AN3124:AN3172:AN3413:AN3706:sldA:rps16:AN4087:nimX:sec13:AN4446:AN4463:kipB:AN4547:AN4580:nup42:aspA:AN4685:myoB:pmtB:cdcA:AN5441:AN5715:AN5815:AN5972:AN5997:AN6257:klpA:sudA:cse1:AN6600:AN6630:AN6632:AN6732:nup170:bimD:AN7302:AN7679:AN7721…	32:31589:48311:1905412:742:1900101:51666:45819:226:70843:51229:7019:917:6033:71470:706:30466:10898:71168:1990802:1903477:60303:6616:10570:70783:35082:1905168:10571:9405:71963:51083:743:43935:31578:30970:447:6348:44878:35853:43087:1902845:34501:45875:70317:35308:61171:1903478:51447:1902846:1904537:31031:30989:1990801:31991:6998:1902404:1990139:40023:1902002:22:72370:1900153:7064:45861:43936:190018…
2181	cytoplasmic translation	15 out of 642 genes, 2.3%	41 out of 10340 background genes, 0.4%	1.21e-05	0	AN0278:AN0445:AN0570:AN0776:AN10182:AN10681:AN1166:AN2275:AN2734:AN2980:AN3172:AN5719:AN5996:AN6563:AN9465	42254:447:2182:27:9267:2181:6407:36170:28:461:45860:45944:2183:6414:6450:448:16236:6449:71216:36180:35690
7017	microtubule-based process	21 out of 642 genes, 3.3%	83 out of 10340 background genes, 0.8%	2.69e-05	0	tubA:mipA:AN10137:benA:plkA:nudK:AN2128:AN2686:rho4:AN2862:AN3124:AN3721:nimX:kipB:nup42:myoB:cdcA:klpA:tubC:uncB:bimB	48311:742:45819:226:51229:7019:917:71470:706:10898:1990802:60303:10570:35082:1905168:10571:30307:71963:743:31578:44878:35853:1902845:34501:45875:70317:35308:61171:51447:1902846:1904537:31031:30989:1990801:31991:1902404:1990139:40023:1902002:22:7064:7093:43936:1900182:30071:1902424:31536:6913:90561:7052:1902440:1990942:30473:7059:31115:82:1903087:7130:1902850:920:31534:30448:1990820:10971:51446:19…
71840	cellular component organization or biogenesis	114 out of 642 genes, 17.8%	1111 out of 10340 background genes, 10.7%	3.01e-05	0	AN0163:AN0203:AN0228:AN0262:tubA:AN0465:manA:mipA:AN0776:cdc20:AN0843:AN0862:AN1013:AN10137:mnpA:AN10614:AN10621:AN1063:AN10743:AN11054:AN1154:AN1166:benA:AN11853:AN1228:AN12408:AN1345:aspD:plkA:mshA:hepA:AN1956:AN1964:AN2054:bipA:AN2128:mad2:easA:AN2686:rho4:AN2734:AN2862:AN2963:AN2969:copA:AN3067:ugmA:AN3124:AN3172:AN3413:fprA:AN3706:AN3749:AN3823:sldA:rps16:AN4087:nimX:pcmA:sec13:AN4475:kipB:A…	32:32889:31589:463:43558:7004:48311:6325:42766:42254:1905412:43066:742:1900101:45819:44774:226:32220:51229:7019:917:6091:6033:31929:71470:706:30466:10898:71168:45004:19184:6267:90529:1990802:1903477:60303:6616:10570:70783:35082:1905168:10571:9405:30307:33314:6012:71963:743:43935:723:31578:6297:6337:447:2182:6348:44878:35853:43087:7021:6303:1902845:70987:34501:6031:45875:70317:1900781:35308:7033:6…
42274	ribosomal small subunit biogenesis	19 out of 642 genes, 3.0%	70 out of 10340 background genes, 0.7%	3.69e-05	0	AN0465:AN1345:AN1964:AN3172:AN3823:rps16:AN4594:AN4803:ubi1:AN5222:AN5441:AN5960:AN5979:AN6632:AN6679:AN7107:AN8870:AN9097:AN9468	447:1900153:1905267:16567:2181:6407:462:469:28:461:45903:42274:6450:2109:30490:6412:6310:56
44260	cellular macromolecule metabolic process	153 out of 642 genes, 23.8%	1643 out of 10340 background genes, 15.9%	5.7e-05	0	AN0228:AN0260:AN0262:AN0278:AN0433:AN0445:AN0465:AN0570:manA:AN0776:mns1B:cdc20:AN0843:AN0862:AN0905:AN0907:AN10087:AN1013:AN10182:AN10258:AN10395:AN10416:AN10497:AN10614:AN10621:AN10681:AN10702:AN10740:AN10755:AN10872:AN11054:AN1122:AN11411:AN11419:AN1166:AN11853:AN12246:AN1228:AN1345:AN1455:rsdA:plkA:mshA:AN1851:AN1904:hepA:AN1964:agdA:AN2054:bipA:AN2096:AN2240:AN2275:AN2296:AN2301:AN2734:AN284…	32:1902426:48478:31589:463:43558:6429:7004:6325:42766:42254:1905412:43066:742:1900101:30968:1901919:45819:70843:51229:31929:71470:706:6489:30466:10898:71168:45004:31662:33168:6267:90529:1990802:1934:60303:6616:10570:23:1905168:10571:9405:30307:33314:6012:2143:9060:43935:723:1990443:6297:6337:31086:16998:30970:447:2182:6348:44878:35853:7021:6303:87:1902845:70987:34501:6031:45875:70317:1990516:3530…
44763	single-organism cellular process	183 out of 642 genes, 28.5%	2065 out of 10340 background genes, 20.0%	6.95e-05	0	AN0050:tmpA:AN0067:AN0163:AN0174:AN0228:pdiB:AN0259:tubA:AN0357:aldA:AN0579:AN0593:manA:mipA:spdA:mns1B:cdc20:niaD:rcyA:ureB:AN10137:AN10146:AN10621:AN10648:AN10700:AN10710:riboG:AN10743:AN10755:AN10795:AN10981:teaC:AN11054:AN11111:phenA:AN11226:AN1154:AN11778:benA:AN11853:AN1271:aspD:AN1455:cysF:rsdA:plkA:oliC:enaB:AN1689:hepA:acuF:nudK:AN1956:AN1968:agdA:bipA:AN2096:AN2128:AN2133:AN2240:gatA:AN…	32:32889:45991:48478:31589:6429:1900617:6227:6116:48311:6325:42766:1905412:45461:742:1900101:51666:30968:45329:6233:45819:44774:226:70843:9082:32220:51229:7019:9108:917:6662:6091:6071:6033:6527:71470:706:6489:30466:10898:71168:45004:19184:31662:33168:6267:90529:1990802:1934:1903477:60303:6616:1902114:10570:23:6098:96:70783:35082:1905168:10571:9405:30307:33314:6012:71963:743:9060:43935:723:1990443…
42255	ribosome assembly	14 out of 642 genes, 2.2%	40 out of 10340 background genes, 0.4%	7.31e-05	0	AN0262:AN1013:AN1166:AN2734:AN3172:AN4475:ubi1:AN5222:AN5715:AN5960:AN5979:rpl3:AN6632:AN8856	447:1900153:27:16567:9267:2181:6407:36170:462:469:42255:28:461:6414:2109:30490:6412:71216:56:36180
30490	maturation of SSU-rRNA	17 out of 642 genes, 2.6%	60 out of 10340 background genes, 0.6%	9.95e-05	0	AN0465:AN1345:AN1964:AN3172:AN3823:AN4594:AN4803:ubi1:AN5222:AN5441:AN5960:AN6632:AN6679:AN7107:AN8870:AN9097:AN9468	447:1900153:1905267:16567:2181:6407:462:469:28:461:45903:6450:2109:30490:6412:6310:56
22402	cell cycle process	51 out of 642 genes, 7.9%	381 out of 10340 background genes, 3.7%	0.00017	0	tmpA:AN0228:mipA:cdc20:AN10137:AN10621:AN10755:benA:AN11853:aspD:plkA:hepA:AN2128:mad2:AN2686:rho4:AN2862:AN2963:AN2969:AN3067:AN3124:AN3749:nimT:sldA:nimX:AN4288:kipB:aspA:AN4685:myoB:ppoC:cdcA:top2:AN5676:tpmA:AN5815:smcB:bud4:klpA:sudA:AN6600:nuvG:AN6732:AN7007:chsA:bimD:aspC:AN8187:bimB:AN9380:AN9463	48478:6325:1905412:742:51666:45819:44774:32220:51229:7019:917:6033:71470:706:30466:10898:71168:45004:31662:6267:90529:1990802:1934:1903477:60303:10570:70783:35082:1905168:10571:9405:30307:33314:71963:743:43935:723:1990443:31578:6297:6348:44878:35853:43087:6303:87:1902845:34501:6031:45875:70317:30437:35308:61171:1903478:734:51447:1902846:1904537:31031:30989:1990801:31991:45950:1902404:1990139:4002…
51276	chromosome organization	42 out of 642 genes, 6.5%	289 out of 10340 background genes, 2.8%	0.00024	0	AN0203:AN0228:mipA:cdc20:AN10137:AN10614:AN10621:benA:AN11853:plkA:mshA:hepA:AN1956:AN2054:AN2128:mad2:AN2862:AN2963:AN2969:AN3067:AN3124:fprA:AN3749:sldA:nimX:kipB:cdcA:top2:facA:AN5815:smcB:AN6214:klpA:sudA:AN6600:nuvG:AN6682:AN6895:bimD:AN8187:AN9113:AN9359	43558:7004:6325:42766:1905412:43066:742:45819:44774:51229:7019:31929:71470:706:30466:10898:71168:45004:6267:1990802:60303:10570:35082:1905168:10571:30307:33314:71963:743:43935:723:31578:6297:6337:6348:44878:35853:6303:1902845:70987:34501:45875:70317:35308:6457:61171:51447:1903464:1902846:1904537:31031:30989:1990801:1990139:1902002:22:72370:43044:7064:7093:43936:1900182:30071:1902424:31536:90561:6…
34613	cellular protein localization	51 out of 642 genes, 7.9%	389 out of 10340 background genes, 3.8%	0.00033	0	sec23:sec61:cdc20:AN0843:AN0847:AN10137:AN10710:AN11226:AN1154:AN1177:hepA:AN2054:bipA:AN2164:rho4:AN2862:AN2963:copA:AN3080:AN3172:AN3413:AN3706:sldA:rps16:AN4087:nimX:sec13:AN4446:AN4463:AN4547:AN4580:aspA:pmtB:cdcA:AN5441:AN5715:AN5815:AN5972:AN5997:AN6257:sudA:cse1:AN6600:AN6630:AN6632:AN6732:bimD:AN7721:aspC:AN9460:AN9463	32:31589:1905412:742:1900101:45819:70843:51229:7019:917:71470:706:30466:10898:71168:1990802:1903477:60303:6616:10570:1905168:10571:9405:51083:743:43935:31578:30970:447:6348:44878:35853:43087:1902845:34501:45875:70317:35308:61171:1903478:51447:1902846:1904537:31031:30989:1990801:31991:6998:1990139:1902002:72370:1900153:7064:45861:43936:1900182:44743:1902424:31536:6913:1902440:6306:6614:33316:7059:…
43170	macromolecule metabolic process	163 out of 642 genes, 25.4%	1828 out of 10340 background genes, 17.7%	0.00034	0	AN0228:AN0260:AN0262:AN0278:AN0433:AN0445:AN0465:AN0570:manA:AN0776:mns1B:cdc20:AN0843:AN0862:AN0905:AN0907:AN10087:AN1013:AN10182:AN10258:AN10351:AN10395:AN10416:AN10497:AN10614:AN10621:AN10681:AN10702:AN10740:AN10755:AN10872:AN11054:AN1122:AN11411:AN11419:AN1166:AN11853:AN12246:AN1228:AN1345:AN1455:rsdA:plkA:AN1638:mshA:AN1851:AN1904:hepA:AN1964:agdA:AN2054:bipA:AN2096:AN2237:AN2240:AN2275:AN22…	32:1902426:43171:48478:31589:463:43558:6429:7004:6325:42766:42254:1905412:43066:742:1900101:30968:1901919:45819:70843:51229:31929:71470:706:6489:30466:10898:71168:45004:31662:33168:6267:90529:1990802:1934:60303:6616:10570:23:1905168:10571:9405:30307:33314:6012:2143:9060:43935:723:1990443:6297:6337:31086:16998:30970:447:2182:6348:44878:35853:7021:6303:87:1902845:70987:34501:6031:45875:70317:199051…
462	maturation of SSU-rRNA from tricistronic rRNA transcript (SSU-rRNA, 5.8S rRNA, LSU-rRNA)	15 out of 642 genes, 2.3%	52 out of 10340 background genes, 0.5%	0.00045	0	AN0465:AN1345:AN1964:AN3172:AN3823:AN4594:AN4803:AN5222:AN5441:AN5960:AN6679:AN7107:AN8870:AN9097:AN9468	447:1905267:2181:6407:462:28:461:45903:6450:6412:6310
70727	cellular macromolecule localization	51 out of 642 genes, 7.9%	393 out of 10340 background genes, 3.8%	0.00045	0	sec23:sec61:cdc20:AN0843:AN0847:AN10137:AN10710:AN11226:AN1154:AN1177:hepA:AN2054:bipA:AN2164:rho4:AN2862:AN2963:copA:AN3080:AN3172:AN3413:AN3706:sldA:rps16:AN4087:nimX:sec13:AN4446:AN4463:AN4547:AN4580:aspA:pmtB:cdcA:AN5441:AN5715:AN5815:AN5972:AN5997:AN6257:sudA:cse1:AN6600:AN6630:AN6632:AN6732:bimD:AN7721:aspC:AN9460:AN9463	32:31589:1905412:742:1900101:45819:70843:51229:7019:917:71470:706:30466:10898:71168:1990802:1903477:60303:6616:10570:1905168:10571:9405:51083:743:43935:31578:30970:447:6348:44878:35853:43087:1902845:34501:45875:70317:35308:61171:1903478:51447:1902846:1904537:31031:30989:1990801:31991:6998:1990139:1902002:72370:1900153:7064:45861:43936:1900182:44743:1902424:31536:6913:1902440:6306:6614:33316:7059:…
7049	cell cycle	51 out of 642 genes, 7.9%	394 out of 10340 background genes, 3.8%	0.00049	0	tmpA:AN0228:mipA:cdc20:AN10137:AN10621:AN10755:benA:AN11853:aspD:plkA:hepA:AN2128:mad2:AN2686:rho4:AN2862:AN2963:AN2969:AN3067:AN3124:AN3749:nimT:sldA:nimX:AN4288:kipB:aspA:AN4685:myoB:ppoC:cdcA:top2:AN5676:tpmA:AN5815:smcB:bud4:klpA:sudA:AN6600:nuvG:AN6732:AN7007:chsA:bimD:aspC:AN8187:bimB:AN9380:AN9463	48478:6325:1905412:742:51666:45819:44774:32220:51229:7019:917:6033:71470:706:30466:10898:71168:45004:31662:6267:90529:1990802:1934:1903477:60303:10570:70783:35082:1905168:10571:9405:30307:33314:71963:743:43935:723:1990443:31578:6297:6348:44878:35853:43087:6303:87:1902845:34501:6031:45875:70317:30437:35308:61171:1903478:734:51447:1902846:1904537:31031:30989:1990801:31991:45950:1902404:1990139:4002…
51649	establishment of localization in cell	52 out of 642 genes, 8.1%	410 out of 10340 background genes, 4.0%	0.00072	0	sec23:sec61:AN0843:AN0847:AN10710:AN1117:AN11226:AN1154:AN1177:benA:aspD:nudK:bipA:AN2128:AN2164:rho4:AN2862:copA:AN3080:AN3124:AN3172:AN3413:AN3706:sldA:rps16:AN4087:nimX:sec13:AN4446:AN4463:kipB:AN4547:AN4580:nup42:myoB:pmtB:cdcA:AN5441:AN5715:AN5815:AN5972:AN5997:AN6257:klpA:cse1:AN6630:AN6632:nup170:AN7302:AN7679:AN7721:AN9460	32:31589:742:1900101:45819:70843:51229:7019:917:6033:71470:706:10898:1990802:60303:6616:10570:70783:35082:1905168:10571:9405:71963:51083:743:31578:30970:447:44878:35853:1902845:34501:45875:70317:35308:61171:51447:1902846:1904537:31031:30989:1990801:31991:6998:1902404:1990139:40023:1902002:22:72370:1900153:7064:45861:43936:1900182:44743:1902424:31536:6913:90561:1990942:6614:33316:30473:31115:82:70…
44699	single-organism process	247 out of 642 genes, 38.5%	3072 out of 10340 background genes, 29.7%	0.00073	0	AN0050:AN0051:tmpA:AN0067:AN0077:AN0163:AN0174:AN0228:pdiB:AN0259:tubA:CYP680A1:AN0357:ureA:aldA:AN0579:AN0593:manA:mipA:spdA:mns1B:cdc20:AN0843:AN0851:niaD:rcyA:AN10078:ureB:AN10137:AN10146:AN10223:AN10602:AN10614:AN10621:AN10648:AN10700:AN10702:AN10710:riboG:AN10743:AN10755:AN10795:AN10905:AN10981:teaC:AN1103:AN11054:AN11111:phenA:AN11226:AN1131:AN1142:AN1154:AN1166:AN11778:benA:AN11853:AN11981…	32:32889:15908:45991:48478:31589:55085:43558:6429:1900617:6227:6116:48311:6325:42766:1905412:45461:43066:742:1900101:51666:30968:45329:6233:45819:44774:226:70843:9082:32220:51229:7019:9108:917:6662:6091:6071:6033:31929:6527:32995:71470:34198:706:90295:6489:30466:10898:71168:45004:19184:31662:33168:6267:90529:1990802:15848:1934:1903477:60303:6616:1902114:10570:23:6098:96:8202:70783:46835:35082:190…
226	microtubule cytoskeleton organization	16 out of 642 genes, 2.5%	63 out of 10340 background genes, 0.6%	0.00123	0	tubA:mipA:AN10137:benA:plkA:AN2128:AN2686:rho4:AN2862:AN3124:nimX:kipB:nup42:cdcA:klpA:bimB	48311:742:45819:226:51229:7019:917:71470:706:10898:1990802:60303:10570:35082:1905168:10571:30307:71963:743:31578:44878:35853:1902845:34501:45875:70317:35308:61171:51447:1902846:1904537:31031:30989:1990801:31991:1990139:40023:1902002:22:7064:7093:43936:1900182:30071:1902424:31536:6913:90561:7052:1902440:1990942:30473:7059:31115:82:1903087:7130:1902850:920:31534:30448:1990820:10971:51446:1904519:70…
8104	protein localization	52 out of 642 genes, 8.1%	418 out of 10340 background genes, 4.0%	0.00131	0	sec23:sec61:cdc20:AN0843:AN0847:AN10137:AN10710:AN11226:AN1154:AN1177:aspD:hepA:AN2054:bipA:AN2164:rho4:AN2862:AN2963:copA:AN3080:AN3172:AN3413:AN3706:sldA:rps16:AN4087:nimX:sec13:AN4446:AN4463:AN4547:AN4580:aspA:pmtB:cdcA:AN5441:AN5715:AN5815:AN5972:AN5997:AN6257:sudA:cse1:AN6600:AN6630:AN6632:AN6732:bimD:AN7721:aspC:AN9460:AN9463	32:31589:1905412:742:1900101:45819:70843:51229:7019:917:6033:71470:706:30466:10898:71168:1990802:1903477:60303:6616:10570:70783:1905168:10571:9405:51083:743:43935:31578:30970:447:6348:44878:35853:43087:1902845:34501:45875:70317:35308:61171:1903478:51447:1902846:1904537:31031:30989:1990801:31991:6998:1990139:40023:1902002:72370:1900153:7064:45861:43936:1900182:44743:1902424:31536:6913:1902440:6306…
6996	organelle organization	76 out of 642 genes, 11.8%	704 out of 10340 background genes, 6.8%	0.00135	0	AN0163:AN0203:AN0228:AN0262:tubA:mipA:cdc20:AN1013:AN10137:AN10614:AN10621:AN1063:AN10743:AN1154:AN1166:benA:AN11853:AN12408:aspD:plkA:mshA:hepA:AN1956:AN2054:bipA:AN2128:mad2:AN2686:rho4:AN2734:AN2862:AN2963:AN2969:copA:AN3067:AN3124:AN3172:fprA:AN3749:sldA:nimX:sec13:AN4475:kipB:nup42:myoB:ubi1:cdcA:AN5222:top2:facA:tpmA:AN5715:AN5815:smcB:AN5960:AN5979:rpl3:AN6214:AN6257:klpA:sudA:AN6600:nuvG:…	32889:43558:7004:48311:6325:42766:1905412:43066:742:45819:44774:226:32220:51229:7019:917:6091:6033:31929:71470:706:30466:10898:71168:45004:6267:1990802:1903477:60303:6616:10570:70783:35082:1905168:10571:9405:30307:33314:71963:743:43935:723:31578:6297:6337:447:6348:44878:35853:43087:6303:1902845:70987:34501:45875:70317:35308:7033:6457:61171:1903478:51447:1903464:1902846:1904537:31031:30989:1990801…
7051	spindle organization	12 out of 642 genes, 1.9%	37 out of 10340 background genes, 0.4%	0.00168	0	mipA:AN10137:benA:plkA:AN2128:AN2686:AN2862:AN3124:nimX:cdcA:klpA:bimB	742:45819:51229:7019:71470:706:10898:1990802:60303:10570:1905168:10571:30307:71963:743:31578:44878:35853:1902845:34501:45875:70317:35308:61171:51447:1902846:1904537:31031:30989:1990801:1990139:1902002:22:7064:7093:43936:1900182:30071:1902424:31536:90561:7052:1902440:1990942:30473:7059:82:1903087:7130:920:31534:30448:1990820:10971:51446:1904519:7017:18107:31116:45736:1990975:7020:278:7070:1990735:…
1902850	microtubule cytoskeleton organization involved in mitosis	12 out of 642 genes, 1.9%	38 out of 10340 background genes, 0.4%	0.00233	0	mipA:AN10137:benA:plkA:AN2128:AN2686:AN2862:AN3124:nimX:kipB:klpA:bimB	742:45819:7019:706:10898:1990802:60303:10570:35082:1905168:10571:30307:71963:743:31578:44878:1902845:45875:70317:35308:61171:51447:1904537:31031:30989:1990801:1990139:1902002:22:7064:7093:43936:1900182:30071:1902424:90561:7052:1902440:1990942:30473:7059:82:1903087:7130:1902850:31534:30448:1990820:10971:51446:1904519:7017:18107:31116:7018:7020:278:7070:1990735:7026:45931:45944:72429:51417:1902542:…
7052	mitotic spindle organization	11 out of 642 genes, 1.7%	33 out of 10340 background genes, 0.3%	0.00346	0	mipA:AN10137:benA:plkA:AN2128:AN2686:AN2862:AN3124:nimX:klpA:bimB	742:45819:7019:706:10898:1990802:60303:10570:1905168:10571:30307:71963:743:31578:44878:1902845:45875:70317:35308:61171:51447:1904537:31031:30989:1990801:1990139:1902002:22:7064:7093:43936:1900182:30071:1902424:90561:7052:1902440:1990942:30473:7059:82:1903087:7130:31534:30448:1990820:10971:51446:1904519:7017:18107:31116:7020:278:7070:1990735:7026:45931:45944:72429:51417:1902542:1901319:46827:320:1…
70972	protein localization to endoplasmic reticulum	11 out of 642 genes, 1.7%	33 out of 10340 background genes, 0.3%	0.00346	0	sec61:AN0847:AN10710:AN11226:AN1154:bipA:AN4446:AN4580:AN6630:AN7721:AN9460	742:70843:6616:51083:30970:44743:6614:31204:6986:6465:19307:30433:6888:70880:16050:9298:6621:6620:7163:45047
7010	cytoskeleton organization	24 out of 642 genes, 3.7%	136 out of 10340 background genes, 1.3%	0.00368	0	AN0163:tubA:mipA:AN10137:AN10743:benA:aspD:plkA:AN2128:AN2686:rho4:AN2862:AN3124:nimX:kipB:nup42:myoB:cdcA:tpmA:klpA:AN6732:aspC:bimB:AN9463	32889:48311:742:45819:226:32220:51229:7019:917:6033:71470:706:10898:1990802:1903477:60303:10570:70783:35082:1905168:10571:9405:30307:71963:743:31578:44878:35853:43087:1902845:34501:45875:70317:35308:7033:61171:1903478:51447:1902846:1904537:31031:30989:1990801:31991:1902404:1990139:40023:1902002:22:7064:7093:43936:1900182:30071:1902424:31536:6913:90561:7052:1902440:1990942:30473:51017:7059:31115:8…
61640	cytoskeleton-dependent cytokinesis	14 out of 642 genes, 2.2%	54 out of 10340 background genes, 0.5%	0.00454	0	mipA:aspD:plkA:rho4:aspA:AN4685:myoB:cdcA:tpmA:AN5815:AN6732:chsA:aspC:AN9463	51666:32220:51229:917:6033:71470:90529:1903477:70783:9405:30307:44878:35853:43087:34501:6031:1903478:1902846:31031:31991:1902404:40023:22:7093:43936:30071:916:31536:6913:90561:33316:51017:7059:7076:9267:90527:36170:920:30448:10971:31505:34503:45736:1990975:1903479:278:7124:45860:6974:1410:45944:921:51417:48315:1902542:32955:6038:46827:320:1990598:8105:71257:7097:71574:1902408:34613:51256:51418:91…
910	cytokinesis	17 out of 642 genes, 2.6%	78 out of 10340 background genes, 0.8%	0.00563	0	mipA:aspD:plkA:AN2128:rho4:nimX:aspA:AN4685:myoB:cdcA:tpmA:AN5815:bud4:AN6732:chsA:aspC:AN9463	51666:45819:32220:51229:917:6033:71470:706:10898:90529:1990802:1903477:60303:10570:70783:1905168:10571:9405:30307:44878:35853:43087:1902845:34501:6031:45875:70317:35308:1903478:51447:1902846:1904537:31031:1990801:31991:1902404:1990139:40023:1902002:22:7093:43936:1900182:30071:916:1902424:31536:6913:90561:33316:51017:7059:82:7076:9267:7130:90527:36170:920:30448:1990820:10971:51446:18107:31505:3450…
33036	macromolecule localization	53 out of 642 genes, 8.3%	451 out of 10340 background genes, 4.4%	0.00585	0	sec23:sec61:cdc20:AN0843:AN0847:AN10078:AN10137:AN10710:AN11226:AN1154:AN1177:aspD:hepA:AN2054:bipA:AN2164:rho4:AN2862:AN2963:copA:AN3080:AN3172:AN3413:AN3706:sldA:rps16:AN4087:nimX:sec13:AN4446:AN4463:AN4547:AN4580:aspA:pmtB:cdcA:AN5441:AN5715:AN5815:AN5972:AN5997:AN6257:sudA:cse1:AN6600:AN6630:AN6632:AN6732:bimD:AN7721:aspC:AN9460:AN9463	32:15908:31589:1905412:742:1900101:45819:70843:51229:7019:917:6033:71470:706:30466:10898:71168:1990802:1903477:60303:6616:10570:70783:1905168:10571:9405:51083:743:43935:31578:30970:447:6348:44878:35853:43087:1902845:34501:45875:70317:35308:61171:1903478:51447:1902846:1904537:31031:30989:1990801:31991:6998:1990139:40023:1902002:72370:1900153:7064:45861:43936:1900182:44743:1902424:31536:6913:190244…
71428	rRNA-containing ribonucleoprotein complex export from nucleus	10 out of 642 genes, 1.6%	29 out of 10340 background genes, 0.3%	0.00701	0	AN0843:AN3172:AN3413:AN3706:rps16:AN4087:AN5441:AN5715:AN5997:AN6632	447:1900153:2181:6407:469:42255:28:461:45903:42274:30490:6412:56
7062	sister chromatid cohesion	9 out of 642 genes, 1.4%	24 out of 10340 background genes, 0.2%	0.00945	0	plkA:hepA:AN2862:AN2963:AN2969:AN3067:sldA:sudA:bimD	1905412:742:7019:30466:71168:45004:10570:30307:33314:743:43935:31578:6297:6348:6303:34501:61171:31031:30989:22:72370:7064:43936:30071:6284:6306:70914:7059:10964:2000817:31573:30448:40008:70868:10971:1904519:1903460:31116:7062:7020:1902975:278:7535:1990735:7026:6279:45944:72480:6281:1902542:71459:51567:51754:46827:320:42276:1902408:61780:1905411:51315:1905116:35822:51455:1904825:31028:6468:1990813…
1901988	negative regulation of cell cycle phase transition	13 out of 642 genes, 2.0%	50 out of 10340 background genes, 0.5%	0.00979	0	AN2128:mad2:AN2862:AN2969:AN3067:nimT:sldA:cdcA:AN5495:AN5676:AN5815:nuvG:AN7007	1902426:48478:742:44774:51229:7019:71470:45004:31662:1934:10570:33314:743:723:1990443:31578:6297:44878:35853:6303:87:34501:61171:1902846:31031:30989:45950:72370:7064:31536:6284:1903468:70914:33316:10964:7076:79:31573:920:30448:45840:70868:10971:1904519:1903460:31116:34503:45736:1990975:7062:7020:1902975:1990735:7026:6974:6279:51312:72480:6281:36289:45836:42787:51754:320:42276:1990598:51315:72428:…
1901991	negative regulation of mitotic cell cycle phase transition	13 out of 642 genes, 2.0%	50 out of 10340 background genes, 0.5%	0.00979	0	AN2128:mad2:AN2862:AN2969:AN3067:nimT:sldA:cdcA:AN5495:AN5676:AN5815:nuvG:AN7007	1902426:48478:742:44774:51229:7019:71470:45004:31662:1934:10570:33314:743:723:1990443:31578:6297:44878:35853:6303:87:34501:61171:1902846:31031:30989:45950:72370:7064:31536:6284:1903468:70914:33316:10964:7076:79:31573:920:30448:45840:70868:10971:1904519:1903460:31116:34503:45736:1990975:7062:7020:1902975:1990735:7026:6974:6279:51312:72480:6281:36289:45836:42787:51754:320:42276:1990598:51315:72428:…
35822	gene conversion	6 out of 642 genes, 0.9%	10 out of 10340 background genes, 0.1%	0.01229	0	AN10621:AN10755:hepA:AN3067:AN3749:AN7007	48478:30466:45004:33314:6297:6348:6303:734:45950:7064:6284:6306:10964:710:6298:31573:40008:1902981:70868:1903460:36297:1902975:7535:6279:71459:51567:42276:35822:61500:43111:1990141:6311:735:7534:7131:31297:43570
281	mitotic cytokinesis	13 out of 642 genes, 2.0%	51 out of 10340 background genes, 0.5%	0.01241	0	mipA:aspD:plkA:rho4:aspA:AN4685:myoB:cdcA:tpmA:AN5815:AN6732:aspC:AN9463	51666:32220:51229:917:6033:71470:1903477:70783:9405:30307:44878:35853:43087:34501:1903478:1902846:31031:31991:1902404:40023:22:7093:43936:30071:31536:6913:90561:33316:51017:7059:7076:9267:90527:36170:920:30448:10971:31505:34503:45736:1990975:1903479:278:7124:45860:6974:1410:45944:921:51417:1902542:32955:46827:320:1990598:8105:71257:7097:71574:1902408:34613:51256:51418:91:42149:1905116:910:9652:32…
7093	mitotic cell cycle checkpoint	13 out of 642 genes, 2.0%	51 out of 10340 background genes, 0.5%	0.01241	0	mipA:AN2128:mad2:AN2862:AN2969:AN3067:nimT:sldA:cdcA:AN5676:AN5815:nuvG:AN7007	48478:742:44774:51229:7019:71470:45004:31662:1934:10570:33314:743:723:1990443:31578:6297:44878:35853:6303:87:34501:61171:1902846:31031:30989:45950:72370:7064:7093:31536:6284:1903468:70914:33316:10964:7076:79:31573:920:30448:45840:70868:10971:1904519:1903460:31116:34503:45736:1990975:7062:7020:1902975:278:1990735:7026:6974:6279:51312:72480:51417:6281:36289:45836:51754:320:42276:1990598:1902408:512…
6888	ER to Golgi vesicle-mediated transport	12 out of 642 genes, 1.9%	44 out of 10340 background genes, 0.4%	0.01286	0	sec23:AN1117:AN11226:AN1154:copA:AN3080:sec13:AN4446:AN5972:AN6257:AN7302:AN7679	6998:30448:6890:280:30433:43547:6888:90114:1904263:16050:6621:45893:6886:7163:31081:32511
7018	microtubule-based movement	10 out of 642 genes, 1.6%	31 out of 10340 background genes, 0.3%	0.01385	0	benA:nudK:AN2128:AN2862:AN3124:AN3721:kipB:myoB:klpA:uncB	742:7019:10570:35082:71963:743:31578:44878:61171:30989:1902404:22:7064:43936:90561:1990942:30473:1903087:1902850:31534:30448:1904519:7017:31116:7018:7020:1990735:7026:921:48315:7097:10938:1905121:51315:30951:910:1904825:98783:1903562:40009:90307:51228:48312:70787:51258:1903563:70:31122:35690
34502	protein localization to chromosome	9 out of 642 genes, 1.4%	25 out of 10340 background genes, 0.2%	0.01395	0	hepA:AN2054:AN2963:sldA:cdcA:AN5815:sudA:AN6600:bimD	1905412:51229:71470:30466:71168:43935:6348:44878:35853:34501:1902846:31031:72370:7064:31536:6306:33316:7059:7076:2000817:2000751:920:30448:40008:61641:34503:45736:1990975:278:7535:6974:72480:6281:71459:51567:51754:320:1990598:61780:1905411:51315:42149:51455:6470:2000775:281:1403:98783:1902406:1990141:7094:34508:1902425:7534:90699:71960:70:51316:35690
45930	negative regulation of mitotic cell cycle	17 out of 642 genes, 2.6%	84 out of 10340 background genes, 0.8%	0.01616	0	mipA:AN2128:mad2:AN2862:AN2969:AN3067:nimT:sldA:nimX:cdcA:AN5495:AN5676:AN5815:nuvG:AN7007:bimD:AN9113	1902426:48478:1905412:742:45819:44774:51229:7019:71470:706:10898:71168:45004:31662:1990802:1934:60303:10570:1905168:10571:33314:743:43935:723:1990443:31578:6297:44878:35853:6303:87:1902845:34501:45875:70317:35308:61171:51447:1903464:1902846:1904537:31031:30989:1990801:45950:1990139:1902002:72370:7064:7093:1900182:1902424:31536:6284:1903468:70914:33316:82:10964:7076:2000817:7130:79:31573:920:30448…
46907	intracellular transport	44 out of 642 genes, 6.9%	362 out of 10340 background genes, 3.5%	0.01663	0	sec23:sec61:AN0843:AN0847:AN10710:AN1117:AN11226:AN1154:AN1177:benA:nudK:bipA:AN2128:AN2164:rho4:AN2862:copA:AN3080:AN3172:AN3413:AN3706:rps16:AN4087:sec13:AN4446:AN4463:AN4547:AN4580:myoB:pmtB:AN5441:AN5715:AN5972:AN5997:AN6257:klpA:cse1:AN6630:AN6632:nup170:AN7302:AN7679:AN7721:AN9460	32:31589:742:1900101:70843:7019:917:6616:10570:9405:71963:51083:743:31578:30970:447:44878:61171:30989:31991:6998:1902404:22:1900153:7064:45861:43936:44743:6913:90561:1990942:6614:30473:31204:1903087:9267:6986:2181:6407:36170:6465:31534:30448:1904519:7017:31505:31116:469:42255:28:7020:461:44845:1990735:7026:6890:921:48315:32955:71712:280:6611:7097:34613:19307:51418:30433:43547:51315:6888:70880:309…
7080	mitotic metaphase plate congression	8 out of 642 genes, 1.2%	20 out of 10340 background genes, 0.2%	0.01771	0	AN2862:AN3124:sldA:nimX:kipB:cdcA:AN5815:klpA	742:45819:51229:7019:71470:706:10898:1990802:60303:10570:35082:1905168:10571:743:31578:44878:35853:1902845:34501:45875:70317:35308:61171:51447:1902846:1904537:31031:30989:1990801:1990139:1902002:22:72370:7064:1900182:1902424:31536:90561:1990942:33316:82:7076:7130:1902850:920:31534:30448:1990820:10971:51446:1904519:18107:31116:34503:45736:7018:1990975:7020:7070:1990735:7026:45931:6974:45944:72480:…
71459	protein localization to chromosome, centromeric region	7 out of 642 genes, 1.1%	15 out of 10340 background genes, 0.1%	0.01852	0	hepA:AN2054:sldA:cdcA:AN5815:AN6600:bimD	1905412:51229:71470:30466:71168:43935:6348:44878:35853:34501:1902846:31031:72370:7064:31536:6306:33316:7076:2000817:2000751:920:30448:40008:61641:34503:45736:1990975:278:7535:6974:72480:6281:71459:51567:51754:320:1990598:1905411:51315:42149:51455:6470:2000775:281:1403:98783:1902406:1990141:7094:34508:1902425:7534:90699:70:51316:35690
7534	gene conversion at mating-type locus	5 out of 642 genes, 0.8%	7 out of 10340 background genes, 0.1%	0.02228	0	AN10621:AN10755:hepA:AN3749:AN7007	48478:30466:33314:6348:734:45950:7064:6306:710:6298:40008:1902981:36297:1902975:7535:6279:71459:51567:61500:43111:1990141:6311:735:7534:7131:31297:43570
28	ribosomal small subunit assembly	6 out of 642 genes, 0.9%	11 out of 10340 background genes, 0.1%	0.02562	0	AN3172:ubi1:AN5222:AN5960:AN5979:AN6632	447:1900153:16567:2181:6407:462:469:28:461:2109:30490:6412:56
6928	movement of cell or subcellular component	10 out of 642 genes, 1.6%	33 out of 10340 background genes, 0.3%	0.02582	0	benA:nudK:AN2128:AN2862:AN3124:AN3721:kipB:myoB:klpA:uncB	742:7019:10570:35082:71963:743:31578:44878:61171:30989:1902404:22:7064:43936:90561:1990942:30473:1903087:1902850:31534:30448:1904519:7017:31116:7018:7020:1990735:7026:921:48315:7097:10938:1905121:51315:30951:910:1904825:98783:1903562:40009:90307:51228:48312:70787:51258:1903563:70:31122:35690
51310	metaphase plate congression	8 out of 642 genes, 1.2%	21 out of 10340 background genes, 0.2%	0.02706	0	AN2862:AN3124:sldA:nimX:kipB:cdcA:AN5815:klpA	742:45819:51229:7019:71470:706:10898:1990802:60303:10570:35082:1905168:10571:743:31578:44878:35853:1902845:34501:45875:70317:35308:61171:51447:1902846:1904537:31031:30989:1990801:1990139:1902002:22:72370:7064:1900182:1902424:31536:90561:1990942:33316:82:7076:7130:1902850:920:31534:30448:1990820:10971:51446:1904519:18107:31116:34503:45736:7018:1990975:7020:7070:1990735:7026:45931:6974:45944:72480:…
1902589	single-organism organelle organization	32 out of 642 genes, 5.0%	236 out of 10340 background genes, 2.3%	0.03016	0	AN0163:tubA:mipA:cdc20:AN10137:AN10743:benA:plkA:hepA:AN2128:rho4:AN2862:AN2963:AN2969:AN3067:AN3124:sldA:nimX:kipB:nup42:cdcA:top2:tpmA:AN5815:smcB:klpA:sudA:AN6600:AN6732:bimD:AN8187:AN9463	32889:48311:6325:1905412:742:45819:226:32220:51229:7019:917:71470:706:30466:10898:71168:45004:1990802:1903477:60303:10570:35082:1905168:10571:30307:33314:71963:743:43935:31578:6297:6348:44878:35853:43087:6303:1902845:34501:45875:70317:35308:7033:61171:1903478:51447:1902846:1904537:31031:30989:1990801:31991:1990139:40023:1902002:22:72370:7064:7093:43936:1900182:30071:1902424:31536:6913:90561:6284:…
75	cell cycle checkpoint	13 out of 642 genes, 2.0%	56 out of 10340 background genes, 0.5%	0.03693	0	mipA:AN2128:mad2:AN2862:AN2969:AN3067:nimT:sldA:cdcA:AN5676:AN5815:nuvG:AN7007	48478:742:44774:51229:7019:71470:45004:31662:1934:10570:33314:743:723:1990443:31578:6297:44878:35853:6303:87:34501:61171:1902846:31031:30989:45950:72370:7064:7093:31536:6284:1903468:70914:33316:10964:7076:79:31573:920:30448:45840:70868:10971:1904519:1903460:31116:34503:45736:1990975:7062:7020:1902975:278:1990735:7026:6974:6279:51312:72480:51417:6281:36289:45836:51754:320:42276:1990598:1902408:512…
51656	establishment of organelle localization	17 out of 642 genes, 2.6%	90 out of 10340 background genes, 0.9%	0.04166	0	benA:aspD:nudK:AN2128:rho4:AN2862:AN3124:sldA:AN4087:nimX:kipB:nup42:myoB:cdcA:AN5815:klpA:AN6632	742:45819:51229:7019:917:6033:71470:706:10898:1990802:60303:10570:70783:35082:1905168:10571:9405:71963:743:31578:44878:35853:1902845:34501:45875:70317:35308:61171:51447:1902846:1904537:31031:30989:1990801:31991:1902404:1990139:40023:1902002:22:72370:1900153:7064:43936:1900182:1902424:31536:6913:90561:1990942:33316:30473:31115:82:7076:1903087:7130:1902850:6407:920:31534:30448:1990820:10971:51446:1…
140013	meiotic nuclear division	12 out of 642 genes, 1.9%	49 out of 10340 background genes, 0.5%	0.04225	0	AN10621:AN11853:plkA:AN2128:mad2:AN2862:AN3749:sldA:nimX:top2:AN5815:bimD	6325:1905412:742:45819:44774:7019:706:30466:10898:71168:1990802:60303:10570:1905168:10571:30307:743:43935:31578:44878:1902845:34501:45875:70317:35308:61171:51447:1904537:31031:30989:1990801:1990139:1902002:22:72370:7064:43936:1900182:30071:1902424:6265:33316:7059:82:7076:710:2000817:7130:6298:30448:1990820:10971:51446:1904519:36297:18107:31116:34503:7020:278:7070:1990735:7026:45931:45944:51312:72…
51225	spindle assembly	6 out of 642 genes, 0.9%	12 out of 10340 background genes, 0.1%	0.04856	0	mipA:plkA:AN2128:AN2862:nimX:klpA	742:45819:7019:706:10898:1990802:60303:10570:1905168:10571:30307:743:31578:44878:1902845:45875:70317:35308:61171:51447:1904537:31031:30989:1990801:1990139:1902002:22:7064:7093:43936:1900182:30071:1902424:90561:1990942:7059:82:7130:31534:30448:1990820:10971:51446:1904519:18107:31116:7020:278:7070:1990735:7026:45931:45944:72429:51417:1902542:1901319:46827:320:10696:32210:1902408:51256:51315:30951:9…
90307	mitotic spindle assembly	6 out of 642 genes, 0.9%	12 out of 10340 background genes, 0.1%	0.04856	0	mipA:plkA:AN2128:AN2862:nimX:klpA	742:45819:7019:706:10898:1990802:60303:10570:1905168:10571:30307:743:31578:44878:1902845:45875:70317:35308:61171:51447:1904537:31031:30989:1990801:1990139:1902002:22:7064:7093:43936:1900182:30071:1902424:90561:1990942:7059:82:7130:31534:30448:1990820:10971:51446:1904519:18107:31116:7020:278:7070:1990735:7026:45931:45944:72429:51417:1902542:1901319:46827:320:10696:32210:1902408:51256:51315:30951:9…
2. FungiFun (https://elbe.hki-jena.de/fungifun/fungifun.php)
FunCat ID	FunCat description	FunCat main category	Gene ID(s)	Exact p-value	Adjusted p-value	# genes / category	# genes / input
12.01.01	ribosomal proteins	Protein synthesis	ANIA_00262 | ANIA_00278 | ANIA_00433 | ANIA_00445 | ANIA_00465 | ANIA_00570 | ANIA_00776 | ANIA_00843 | ANIA_00907 | ANIA_01013 | ANIA_01122 | ANIA_01166 | ANIA_01228 | ANIA_01345 | ANIA_01964 | ANIA_02275 | ANIA_02301 | ANIA_02734 | ANIA_02980 | ANIA_03172 | ANIA_03413 | ANIA_03706 | ANIA_03823 | ANIA_04060 | ANIA_04073 | ANIA_04087 | ANIA_04202 | ANIA_04222 | ANIA_04475 | ANIA_04494 | ANIA_0452…	5.3528e-37	2.1839e-34	70 / 163	70 / 653
12.04	translation	Protein synthesis	ANIA_00262 | ANIA_00278 | ANIA_00445 | ANIA_00465 | ANIA_00570 | ANIA_00776 | ANIA_00843 | ANIA_01013 | ANIA_01122 | ANIA_01166 | ANIA_01228 | ANIA_01345 | ANIA_01408 | ANIA_01519 | ANIA_01964 | ANIA_02275 | ANIA_02301 | ANIA_02734 | ANIA_02980 | ANIA_03172 | ANIA_03413 | ANIA_03706 | ANIA_04060 | ANIA_04073 | ANIA_04087 | ANIA_04163 | ANIA_04202 | ANIA_04222 | ANIA_04475 | ANIA_04494 | ANIA_0452…	5.8956e-35	1.2027e-32	70 / 173	70 / 653
12.01	ribosome biogenesis	Protein synthesis	ANIA_00262 | ANIA_00445 | ANIA_00465 | ANIA_00570 | ANIA_00776 | ANIA_00843 | ANIA_00907 | ANIA_01013 | ANIA_01122 | ANIA_01228 | ANIA_01345 | ANIA_01964 | ANIA_02275 | ANIA_02301 | ANIA_02734 | ANIA_02980 | ANIA_03172 | ANIA_03413 | ANIA_03598 | ANIA_03706 | ANIA_03823 | ANIA_04060 | ANIA_04087 | ANIA_04163 | ANIA_04202 | ANIA_04222 | ANIA_04475 | ANIA_04494 | ANIA_04522 | ANIA_04594 | ANIA_0479…	1.917e-27	2.6071e-25	62 / 173	62 / 653
16.01	protein binding	Protein with binding function or cofactor requirement (structural or analytic)	ANIA_00067 | ANIA_00163 | ANIA_00228 | ANIA_00260 | ANIA_00261 | ANIA_00262 | ANIA_00278 | ANIA_00316 | ANIA_00433 | ANIA_00445 | ANIA_00465 | ANIA_00570 | ANIA_00610 | ANIA_00665 | ANIA_00676 | ANIA_00776 | ANIA_00814 | ANIA_00834 | ANIA_00843 | ANIA_00847 | ANIA_00862 | ANIA_01013 | ANIA_01063 | ANIA_01122 | ANIA_01154 | ANIA_01166 | ANIA_01177 | ANIA_01182 | ANIA_01228 | ANIA_01345 | ANIA_0139…	1.4941e-13	1.524e-11	176 / 1435	176 / 653
10.03.01.01	mitotic cell cycle	Cell cycle and DNA processing	ANIA_00228 | ANIA_02137 | ANIA_02847 | ANIA_02963 | ANIA_03795 | ANIA_05406 | ANIA_05495 | ANIA_05815 | ANIA_05899 | ANIA_06364 | ANIA_07296 | ANIA_08783 | ANIA_10497	7.0467e-7	5.7501e-05	13 / 35	13 / 653
20.09.07.03	ER to Golgi transport	Cellular transport, transport facilitation and transport routes	ANIA_00261 | ANIA_01117 | ANIA_01154 | ANIA_01177 | ANIA_02738 | ANIA_03026 | ANIA_03080 | ANIA_04317 | ANIA_04446 | ANIA_04547 | ANIA_05972 | ANIA_06257 | ANIA_06307 | ANIA_07302 | ANIA_07679 | ANIA_08194 | ANIA_11226	2.5001e-06	0.00017001	17 / 63	17 / 653
20.09.07.25	vesicle formation	Cellular transport, transport facilitation and transport routes	ANIA_00261 | ANIA_00665 | ANIA_01154 | ANIA_01177 | ANIA_03026 | ANIA_03080 | ANIA_04317 | ANIA_04463 | ANIA_04547 | ANIA_05972	2.9918e-05	0.0017438	10 / 29	10 / 653
42.09	intracellular transport vesicles	Biogenesis of cellular components	ANIA_00261 | ANIA_00665 | ANIA_01154 | ANIA_01177 | ANIA_03026 | ANIA_03080 | ANIA_04317 | ANIA_04463 | ANIA_04547 | ANIA_05972	4.1883e-05	0.002136	10 / 30	10 / 653
10.03.01.01.11	M phase	Cell cycle and DNA processing	ANIA_00814 | ANIA_01560 | ANIA_02128 | ANIA_02511 | ANIA_02862 | ANIA_02963 | ANIA_03941 | ANIA_03946 | ANIA_04706 | ANIA_05676 | ANIA_05815 | ANIA_05899 | ANIA_06340 | ANIA_06364 | ANIA_08783 | ANIA_10258	9.7791e-05	0.0044332	16 / 74	16 / 653
10.03.01.03	cell cycle checkpoints (checkpoints of morphogenesis, DNA-damage,-replication, mitotic phase and spindle)	Cell cycle and DNA processing	ANIA_00814 | ANIA_01708 | ANIA_02128 | ANIA_02511 | ANIA_02862 | ANIA_02927 | ANIA_02969 | ANIA_03067 | ANIA_03749 | ANIA_03946 | ANIA_05676 | ANIA_06300 | ANIA_06616 | ANIA_07007 | ANIA_10258 | ANIA_10621	0.00013672	0.0055783	16 / 76	16 / 653
16.07	structural protein binding	Protein with binding function or cofactor requirement (structural or analytic)	ANIA_00316 | ANIA_00676 | ANIA_01182 | ANIA_01953 | ANIA_02734 | ANIA_04317 | ANIA_04463 | ANIA_04706 | ANIA_06257 | ANIA_06738 | ANIA_06838 | ANIA_07296 | ANIA_08496	0.00042753	0.015858	13 / 60	13 / 653
2.1	tricarboxylic-acid pathway (citrate cycle, Krebs cycle, TCA cycle)	Energy	ANIA_00896 | ANIA_01103 | ANIA_02332 | ANIA_02916 | ANIA_03639 | ANIA_05626 | ANIA_05833 | ANIA_06168 | ANIA_06499 | ANIA_06650 | ANIA_06708 | ANIA_08559	0.00055429	0.018846	12 / 54	12 / 653
10.01.03.03	ori recognition and priming complex formation	Cell cycle and DNA processing	ANIA_00228 | ANIA_00260 | ANIA_03033 | ANIA_05676 | ANIA_05992 | ANIA_10497 | ANIA_10755	0.0011395	0.035763	7 / 23	7 / 653
Strain:	control
Stress:	tBOOH
Group:	up-regulated genes
1. AspGD Gene Ontology Term Finder (http://www.aspergillusgenome.org/cgi-bin/GO/goTermFinder)
GOID	GO_term	Cluster frequency	Background frequency	Corrected P-value	False discovery rate	Gene(s) annotated to the term	Directly Annotated GOID List
55085	transmembrane transport	95 out of 671 genes, 14.2%	676 out of 10340 background genes, 6.5%	1.73e-10	0	AN0201:antA:AN0404:AN0497:AN0581:AN0601:AN0732:AN0771:pexG:AN10075:AN1014:pexE:AN10862:AN10949:AN11209:AN1145:AN12074:pexM:AN1788:AN1797:AN2282:atrD:AN2349:xtrC:AN2466:AN2468:AN2585:AN2675:AN2707:sB:AN2794:AN2827:pexF:AN3195:AN3210:AN3220:AN3221:xtrB:AN3311:AN3357:AN3408:AN3722:AN3763:AN3876:AN3997:AN4150:pmcB:hsp70:AN5140:AN5304:acuH:AN5540:AN5549:AN5656:AN5681:AN5917:pexA:AN6089:jenA:agtA:AN623…	10255:36178:51131:90344:9437:97308:70778:44550:6813:6635:35879:70887:15813:6084:15837:6631:48315:6849:55085:42710:15903:103:15686:10043:6458:10106:40009:46942:71216:7034:55088:30476:6556:16558:35442:9062:42268:45733:7163:6855:8272:34605:50821:15867:97080:30150:15976:6814:60:70588:36244:10509:15758:43161:45333:71383:16560:6830:46352:15879:36180:6091:44267:71470:72318:16562:6835:15824:1905136:45835…
6631	fatty acid metabolic process	25 out of 671 genes, 3.7%	102 out of 10340 background genes, 1.0%	4.18e-06	0	antA:scdA:AN0868:pexG:AN0949:pexE:AN1050:farB:pexM:AN1840:pexF:fatA:acuH:acuD:AN5646:AN5990:pexA:acuJ:AN6555:aoxA:foxA:AN7770:AN7873:orsA:faaB	1900590:51792:9437:6635:42760:45944:1900614:19626:6084:6631:55085:1900815:33540:55114:16558:9062:45461:45733:19748:15867:15976:30437:1900584:45333:16560:1676:15879:1900557:1900593:16562:6853:6351:42758:1900611:34599:6097:33539:44011:44539:1302:6641:7031:42318:38:9405:6625:6633
9062	fatty acid catabolic process	11 out of 671 genes, 1.6%	27 out of 10340 background genes, 0.3%	0.00034	0	antA:scdA:AN0868:pexE:farB:acuD:AN5646:acuJ:aoxA:foxA:AN7770	9437:6635:42760:45944:19626:6084:6631:55085:33540:9062:45733:15867:15976:30437:45333:16560:6853:6351:42758:6097:33539:44011:7031:42318:9405
43436	oxoacid metabolic process	67 out of 671 genes, 10.0%	557 out of 10340 background genes, 5.4%	0.00043	0	antA:AN0300:AN0385:sidI:AN0717:scdA:AN0840:AN0868:pexG:AN0912:AN0949:pexE:AN10298:AN1050:AN10863:AN1150:xprG:farB:pexM:prnD:AN1809:AN1840:metE:AN2389:AN2525:leu2B:pacC:pexF:AN3073:AN3456:AN3524:AN3805:AN4323:fatA:acuH:AN5610:acuD:AN5646:AN5867:luA:AN5957:AN5990:pexA:AN6227:trpB:acuJ:AN6338:AN6555:aoxA:metG:foxA:AN7451:AN7479:AN7722:AN7770:AN7873:AN7876:orsA:AN8060:hapX:faaB:AN8859:alcR:alcA:AN915…	51792:9437:97308:42760:45944:19626:6084:9072:1900549:48315:55085:6567:6116:6338:70791:9097:40009:33540:19346:6520:31171:6563:45461:19748:71467:9113:6553:15867:6995:6807:6555:90375:15976:52699:42594:9082:1900584:42744:6564:1676:6071:1900557:6560:1900695:42316:6696:16562:34198:6355:71266:6853:6351:42758:6525:1903257:1900611:34599:44011:44539:44030:6419:33609:6425:7031:19521:70301:6107:6879:947:6625…
15893	drug transport	8 out of 671 genes, 1.2%	14 out of 10340 background genes, 0.1%	0.00056	0	AN0581:AN0771:AN10949:atrD:AN2349:cntA:AN5656:atrB	42710:55088:30476:46618:30003:34599:45332:70887:15903:6556:6855:15893:15858:10509:71383:1765:15862:35690
6635	fatty acid beta-oxidation	8 out of 671 genes, 1.2%	14 out of 10340 background genes, 0.1%	0.00056	0	antA:scdA:AN0868:pexE:AN5646:acuJ:aoxA:foxA	9437:42760:6084:55085:33540:15867:15976:6853:42758:44011:7031:9405:6635:6631:9062:45733:45333:16560:6097:33539:42318
6082	organic acid metabolic process	67 out of 671 genes, 10.0%	561 out of 10340 background genes, 5.4%	0.00056	0	antA:AN0300:AN0385:sidI:AN0717:scdA:AN0840:AN0868:pexG:AN0912:AN0949:pexE:AN10298:AN1050:AN10863:AN1150:xprG:farB:pexM:prnD:AN1809:AN1840:metE:AN2389:AN2525:leu2B:pacC:pexF:AN3073:AN3456:AN3524:AN3805:AN4323:fatA:acuH:AN5610:acuD:AN5646:AN5867:luA:AN5957:AN5990:pexA:AN6227:trpB:acuJ:AN6338:AN6555:aoxA:metG:foxA:AN7451:AN7479:AN7722:AN7770:AN7873:AN7876:orsA:AN8060:hapX:faaB:AN8859:alcR:alcA:AN915…	51792:9437:97308:42760:45944:19626:6084:9072:1900549:48315:55085:6567:6116:6338:70791:9097:40009:33540:19346:6520:31171:6563:45461:19748:71467:9113:6553:15867:6995:6807:6555:90375:15976:52699:42594:9082:1900584:42744:6564:1676:6071:1900557:6560:1900695:42316:6696:16562:34198:6355:71266:6853:6351:42758:6525:1903257:1900611:34599:44011:44539:44030:6419:33609:6425:7031:19521:70301:6107:6879:947:6625…
19752	carboxylic acid metabolic process	65 out of 671 genes, 9.7%	541 out of 10340 background genes, 5.2%	0.00068	0	antA:AN0300:AN0385:AN0717:scdA:AN0840:AN0868:pexG:AN0912:AN0949:pexE:AN10298:AN1050:AN10863:AN1150:xprG:farB:pexM:prnD:AN1809:AN1840:metE:AN2389:AN2525:leu2B:pacC:pexF:AN3073:AN3456:AN3524:AN3805:AN4323:fatA:acuH:AN5610:acuD:AN5646:AN5867:luA:AN5957:AN5990:pexA:AN6227:trpB:acuJ:AN6338:AN6555:aoxA:metG:foxA:AN7451:AN7479:AN7722:AN7770:AN7873:AN7876:orsA:AN8060:faaB:AN8859:alcR:alcA:AN9157:catB:AN9…	51792:9437:97308:42760:45944:19626:6084:9072:1900549:48315:55085:6567:6116:6338:70791:9097:40009:33540:19346:6520:6563:45461:19748:71467:9113:6553:15867:6995:6807:6555:15976:52699:42594:9082:1900584:42744:6564:1676:6071:1900557:6560:1900695:42316:16562:34198:6355:71266:6853:6351:42758:6525:1903257:1900611:34599:44011:44539:44030:6419:33609:6425:7031:19521:70301:6107:947:9405:6625:70145:6530:19005…
9098	leucine biosynthetic process	5 out of 671 genes, 0.7%	5 out of 10340 background genes, 0.0%	0.001	0	AN0840:AN0912:leu2B:AN4323:luA	97308:9097:9082:9405:55114:6097:9099:9083:9081:9098
6855	drug transmembrane transport	7 out of 671 genes, 1.0%	11 out of 10340 background genes, 0.1%	0.00108	0	AN0581:AN0771:AN10949:atrD:AN2349:AN5656:atrB	42710:55088:30476:46618:30003:34599:45332:70887:15903:6556:6855:10509:71383:1765:35690
19395	fatty acid oxidation	8 out of 671 genes, 1.2%	15 out of 10340 background genes, 0.1%	0.00113	0	antA:scdA:AN0868:pexE:AN5646:acuJ:aoxA:foxA	9437:42760:6084:55085:33540:15867:15976:6853:42758:44011:7031:9405:6635:6631:9062:45733:45333:16560:6097:33539:42318
34440	lipid oxidation	8 out of 671 genes, 1.2%	15 out of 10340 background genes, 0.1%	0.00113	0	antA:scdA:AN0868:pexE:AN5646:acuJ:aoxA:foxA	9437:42760:6084:55085:33540:15867:15976:6853:42758:44011:7031:9405:6635:6631:9062:45733:45333:16560:6097:33539:42318
6810	transport	117 out of 671 genes, 17.4%	1192 out of 10340 background genes, 11.5%	0.0016	0	AN0201:antA:AN0295:AN0404:AN0497:AN0581:AN0601:AN0725:AN0732:AN0770:AN0771:pexG:AN10075:AN1014:pexE:AN10862:AN10949:AN11209:AN1145:AN12074:pexM:AN1788:AN1797:AN2076:AN2282:atrD:AN2349:xtrC:AN2466:AN2468:AN2585:AN2675:AN2707:sB:AN2731:mexA:AN2794:AN2827:pexF:AN3195:AN3210:AN3220:AN3221:xtrB:AN3311:AN3357:AN3408:AN3722:AN3763:AN3876:AN3997:AN4150:AN4912:pmcB:hsp70:atgH:AN5140:nudC:fatA:AN5302:AN530…	43936:1900182:10255:36178:9437:97308:44550:15891:55:6084:48315:6849:1990116:55085:42710:6458:40009:46942:46519:71712:55088:30476:33523:15031:42787:8272:742:34605:15867:16320:97080:15976:226:6814:60:70588:36244:43161:15758:46352:30473:71211:35719:6091:71470:34629:16562:15824:1905136:51306:6853:42026:46618:51228:32258:1900035:30003:51594:15793:35617:34599:31921:9267:1902001:44011:51604:44539:44805:…
51234	establishment of localization	117 out of 671 genes, 17.4%	1234 out of 10340 background genes, 11.9%	0.00868	0	AN0201:antA:AN0295:AN0404:AN0497:AN0581:AN0601:AN0725:AN0732:AN0770:AN0771:pexG:AN10075:AN1014:pexE:AN10862:AN10949:AN11209:AN1145:AN12074:pexM:AN1788:AN1797:AN2076:AN2282:atrD:AN2349:xtrC:AN2466:AN2468:AN2585:AN2675:AN2707:sB:AN2731:mexA:AN2794:AN2827:pexF:AN3195:AN3210:AN3220:AN3221:xtrB:AN3311:AN3357:AN3408:AN3722:AN3763:AN3876:AN3997:AN4150:AN4912:pmcB:hsp70:atgH:AN5140:nudC:fatA:AN5302:AN530…	43936:1900182:10255:36178:9437:97308:44550:15891:55:6084:48315:6849:1990116:55085:42710:6458:40009:46942:46519:71712:55088:30476:33523:15031:42787:8272:742:34605:15867:16320:97080:15976:226:6814:60:70588:36244:43161:15758:46352:30473:71211:35719:6091:71470:34629:16562:15824:1905136:51306:6853:42026:46618:51228:32258:1900035:30003:51594:15793:35617:34599:31921:9267:1902001:44011:51604:44539:44805:…
9082	branched-chain amino acid biosynthetic process	8 out of 671 genes, 1.2%	19 out of 10340 background genes, 0.2%	0.01059	0	AN0385:AN0840:AN0912:leu2B:AN4323:luA:AN5957:AN7876	97308:9097:9082:9405:55114:6097:9099:9083:9081:9098
16558	protein import into peroxisome matrix	7 out of 671 genes, 1.0%	15 out of 10340 background genes, 0.1%	0.01683	0	pexG:pexE:pexM:pexF:AN5681:pexA:AN6258	16562:34599:209:6625:6635:6631:16558:42268:16560:1302:42318
72329	monocarboxylic acid catabolic process	13 out of 671 genes, 1.9%	52 out of 10340 background genes, 0.5%	0.01705	0	antA:AN0300:scdA:AN0868:pexE:farB:acuH:acuD:AN5646:acuJ:aoxA:foxA:AN7770	9437:42760:45944:19626:6084:55085:33540:15867:6995:15976:6853:6351:42758:44011:7031:9405:6530:6528:6635:6631:9062:45733:30437:45333:16560:15879:6097:33539:42318
43574	peroxisomal transport	7 out of 671 genes, 1.0%	17 out of 10340 background genes, 0.2%	0.04536	0	pexG:pexE:pexM:pexF:AN5681:pexA:AN6258	16562:34599:209:6625:6635:6631:16558:42268:16560:1302:42318
6625	protein targeting to peroxisome	7 out of 671 genes, 1.0%	17 out of 10340 background genes, 0.2%	0.04536	0	pexG:pexE:pexM:pexF:AN5681:pexA:AN6258	16562:34599:209:6625:6635:6631:16558:42268:16560:1302:42318
72662	protein localization to peroxisome	7 out of 671 genes, 1.0%	17 out of 10340 background genes, 0.2%	0.04536	0	pexG:pexE:pexM:pexF:AN5681:pexA:AN6258	16562:34599:209:6625:6635:6631:16558:42268:16560:1302:42318
72663	establishment of protein localization to peroxisome	7 out of 671 genes, 1.0%	17 out of 10340 background genes, 0.2%	0.04536	0	pexG:pexE:pexM:pexF:AN5681:pexA:AN6258	16562:34599:209:6625:6635:6631:16558:42268:16560:1302:42318
6551	leucine metabolic process	5 out of 671 genes, 0.7%	8 out of 10340 background genes, 0.1%	0.04751	0.0018	AN0840:AN0912:leu2B:AN4323:luA	97308:9097:9082:9405:55114:6097:9099:9083:9081:9098
2. FungiFun (https://elbe.hki-jena.de/fungifun/fungifun.php)
FunCat ID	FunCat description	FunCat main category	Gene ID(s)	Exact p-value	Adjusted p-value	# genes / category	# genes / input
20.09.03	peroxisomal transport	Cellular transport, transport facilitation and transport routes	ANIA_00257 | ANIA_00880 | ANIA_01014 | ANIA_01511 | ANIA_02925 | ANIA_04403 | ANIA_05681 | ANIA_06161 | ANIA_06279 | ANIA_08280 | ANIA_10215	7.0058e-8	2.5242e-05	11 / 22	11 / 686
2.25	oxidation of fatty acids	Energy	ANIA_00257 | ANIA_00370 | ANIA_00824 | ANIA_00868 | ANIA_01050 | ANIA_01699 | ANIA_01840 | ANIA_05192 | ANIA_05646 | ANIA_05852 | ANIA_05878 | ANIA_06235 | ANIA_06394 | ANIA_06752 | ANIA_06835 | ANIA_07111 | ANIA_07770 | ANIA_08280	1.4649e-7	2.5242e-05	18 / 62	18 / 686
20.09.18.07	non-vesicular cellular import	Cellular transport, transport facilitation and transport routes	ANIA_00497 | ANIA_01797 | ANIA_02282 | ANIA_02358 | ANIA_02466 | ANIA_02468 | ANIA_02585 | ANIA_02730 | ANIA_02794 | ANIA_03195 | ANIA_03210 | ANIA_03220 | ANIA_03221 | ANIA_03408 | ANIA_03722 | ANIA_03763 | ANIA_03876 | ANIA_03997 | ANIA_04150 | ANIA_05304 | ANIA_05917 | ANIA_06118 | ANIA_06669 | ANIA_06804 | ANIA_07137 | ANIA_07344 | ANIA_07800 | ANIA_07898 | ANIA_08337 | ANIA_08365 | ANIA_0850…	1.9618e-7	2.5242e-05	41 / 248	41 / 686
20.03.22	transport ATPases	Cellular transport, transport facilitation and transport routes	ANIA_00404 | ANIA_00771 | ANIA_02300 | ANIA_02349 | ANIA_02669 | ANIA_02827 | ANIA_04912 | ANIA_04920 | ANIA_05350 | ANIA_06237 | ANIA_06397 | ANIA_06642 | ANIA_06718 | ANIA_07091 | ANIA_07254 | ANIA_07549 | ANIA_08104 | ANIA_08365 | ANIA_08489 | ANIA_09344 | ANIA_10949	1.4139e-06	0.00012197	21 / 93	21 / 686
20.01.27	drug/toxin transport	Cellular transport, transport facilitation and transport routes	ANIA_00201 | ANIA_00404 | ANIA_00581 | ANIA_00601 | ANIA_00732 | ANIA_00771 | ANIA_01145 | ANIA_02300 | ANIA_02349 | ANIA_02675 | ANIA_02707 | ANIA_03264 | ANIA_05140 | ANIA_05540 | ANIA_05656 | ANIA_06237 | ANIA_06477 | ANIA_06581 | ANIA_07200 | ANIA_07800 | ANIA_08095 | ANIA_08340 | ANIA_08344 | ANIA_08365 | ANIA_08489 | ANIA_09165 | ANIA_09316 | ANIA_09344 | ANIA_10862 | ANIA_10949	1.5799e-06	0.00012197	30 / 167	30 / 686
32.07.05	detoxification by export	Cell rescue, defense and virulence	ANIA_00201 | ANIA_00404 | ANIA_00581 | ANIA_00601 | ANIA_00732 | ANIA_00771 | ANIA_01145 | ANIA_02300 | ANIA_02349 | ANIA_02675 | ANIA_02707 | ANIA_03264 | ANIA_05540 | ANIA_05656 | ANIA_06237 | ANIA_06477 | ANIA_06581 | ANIA_07200 | ANIA_08095 | ANIA_08340 | ANIA_08344 | ANIA_08489 | ANIA_09165 | ANIA_09344 | ANIA_10862 | ANIA_10949	2.4025e-06	0.00015456	26 / 136	26 / 686
01.06.05	fatty acid metabolism	Metabolism	ANIA_00257 | ANIA_00272 | ANIA_00370 | ANIA_00574 | ANIA_00824 | ANIA_00868 | ANIA_00880 | ANIA_00887 | ANIA_01014 | ANIA_01050 | ANIA_03293 | ANIA_03400 | ANIA_05192 | ANIA_05637 | ANIA_05646 | ANIA_05878 | ANIA_06279 | ANIA_06394 | ANIA_06555 | ANIA_06752 | ANIA_06835 | ANIA_07111 | ANIA_07764 | ANIA_07770 | ANIA_07873 | ANIA_08163 | ANIA_08403 | ANIA_09378 | ANIA_10747	5.4241e-06	0.0002991	29 / 168	29 / 686
01.01.11.04.02	degradation of leucine	Metabolism	ANIA_00385 | ANIA_00887 | ANIA_04323 | ANIA_05886 | ANIA_05957 | ANIA_06394 | ANIA_07764 | ANIA_07876 | ANIA_09131 | ANIA_10783	1.1986e-05	0.00057832	10 / 28	10 / 686
01.01.11.04.01	biosynthesis of leucine	Metabolism	ANIA_00385 | ANIA_00840 | ANIA_00912 | ANIA_02793 | ANIA_04323 | ANIA_05886 | ANIA_05957 | ANIA_06394 | ANIA_07876	1.4008e-05	0.00060079	9 / 23	9 / 686
20.03.25	ABC transporters	Cellular transport, transport facilitation and transport routes	ANIA_00404 | ANIA_00771 | ANIA_01014 | ANIA_02300 | ANIA_02349 | ANIA_02707 | ANIA_06237 | ANIA_06512 | ANIA_06581 | ANIA_07200 | ANIA_07254 | ANIA_08095 | ANIA_08344 | ANIA_08365 | ANIA_08489 | ANIA_09344 | ANIA_10862 | ANIA_10949	1.7447e-05	0.00067192	18 / 84	18 / 686
01.01.11.02.02	degradation of isoleucine	Metabolism	ANIA_00385 | ANIA_00824 | ANIA_04323 | ANIA_05957 | ANIA_07764 | ANIA_07876 | ANIA_10783	1.9148e-05	0.00067192	7 / 14	7 / 686
01.01.11.03.02	degradation of valine	Metabolism	ANIA_00385 | ANIA_00824 | ANIA_04323 | ANIA_05957 | ANIA_07764 | ANIA_07876 | ANIA_10783	3.3721e-05	0.0010847	7 / 15	7 / 686
32.07	detoxification	Cell rescue, defense and virulence	ANIA_00581 | ANIA_00601 | ANIA_00771 | ANIA_00932 | ANIA_01145 | ANIA_02669 | ANIA_02707 | ANIA_02798 | ANIA_03264 | ANIA_03265 | ANIA_03849 | ANIA_04151 | ANIA_04912 | ANIA_05350 | ANIA_05440 | ANIA_05540 | ANIA_05656 | ANIA_06817 | ANIA_07199 | ANIA_07800 | ANIA_07823 | ANIA_07924 | ANIA_08104 | ANIA_08199 | ANIA_08365 | ANIA_08489 | ANIA_09344 | ANIA_10220 | ANIA_10793 | ANIA_10862 | ANIA_10949	7.7876e-05	0.0023123	31 / 212	31 / 686
20.09.16.01	Type I protein secretion system (ABC-type transport systems)	Cellular transport, transport facilitation and transport routes	ANIA_00404 | ANIA_02300 | ANIA_02349 | ANIA_06237 | ANIA_06512 | ANIA_06581 | ANIA_07200 | ANIA_08095 | ANIA_08489	0.00027037	0.0074545	9 / 32	9 / 686
1.2	secondary metabolism	Metabolism	ANIA_00201 | ANIA_00274 | ANIA_00330 | ANIA_00370 | ANIA_00385 | ANIA_00567 | ANIA_00608 | ANIA_00732 | ANIA_00771 | ANIA_00992 | ANIA_01101 | ANIA_01292 | ANIA_01425 | ANIA_01505 | ANIA_01518 | ANIA_01548 | ANIA_01650 | ANIA_01882 | ANIA_02349 | ANIA_02350 | ANIA_02358 | ANIA_02468 | ANIA_02561 | ANIA_02648 | ANIA_02675 | ANIA_02879 | ANIA_02891 | ANIA_03017 | ANIA_03220 | ANIA_03264 | ANIA_0328…	0.00033034	0.0085008	102 / 1054	102 / 686
01.01.06.04.02	degradation of threonine	Metabolism	ANIA_02525 | ANIA_03456 | ANIA_03805 | ANIA_05634 | ANIA_07764	0.00056799	0.013703	5 / 11	5 / 686
32.01.07	unfolded protein response (e.g. ER quality control)	Cell rescue, defense and virulence	ANIA_01047 | ANIA_01296 | ANIA_02051 | ANIA_02238 | ANIA_04192 | ANIA_04583 | ANIA_05129 | ANIA_05602 | ANIA_07254 | ANIA_07321 | ANIA_08269 | ANIA_09124 | ANIA_10778	0.0018665	0.04238	13 / 74	13 / 686
32.07.07	oxygen and radical detoxification	Cell rescue, defense and virulence	ANIA_00932 | ANIA_02846 | ANIA_03298 | ANIA_03581 | ANIA_03849 | ANIA_05440 | ANIA_10220	0.0022047	0.046246	7 / 27	7 / 686
1.01	amino acid metabolism	Metabolism	ANIA_00201 | ANIA_00385 | ANIA_00717 | ANIA_00824 | ANIA_00840 | ANIA_01150 | ANIA_01731 | ANIA_02350 | ANIA_02730 | ANIA_03456 | ANIA_04323 | ANIA_05318 | ANIA_05440 | ANIA_05610 | ANIA_05616 | ANIA_05823 | ANIA_05867 | ANIA_05957 | ANIA_06231 | ANIA_06869 | ANIA_07051 | ANIA_07321 | ANIA_07722 | ANIA_08859 | ANIA_10220 | ANIA_10298 | ANIA_10863	0.0022764	0.046246	27 / 214	27 / 686
Strain:	control
Stress:	tBOOH
Group:	down-regulated genes
1. AspGD Gene Ontology Term Finder (http://www.aspergillusgenome.org/cgi-bin/GO/goTermFinder)
GOID	GO_term	Cluster frequency	Background frequency	Corrected P-value	False discovery rate	Gene(s) annotated to the term	Directly Annotated GOID List
42254	ribosome biogenesis	113 out of 636 genes, 17.8%	181 out of 10340 background genes, 1.8%	1.32e-89	0	AN0074:AN0092:AN0237:AN0247:AN0262:AN0305:AN0421:AN0465:AN0475:AN0647:AN0695:AN0745:AN0776:AN0796:AN0843:AN0946:AN10058:AN1013:rpf2:AN10352:AN10618:AN10712:AN10943:cgrA:AN1166:AN11773:AN1200:AN1215:AN1228:hscA:AN1319:AN1345:bop1:AN1434:AN1666:AN1949:AN1964:AN2079:AN2292:AN2734:nsa2:AN3056:rmtB:nop58:AN3172:spb4:AN3313:AN3413:AN3706:rrs1:AN3827:rps16:AN4087:AN4232:AN4298:AN4460:AN4469:AN4471:AN447…	398:51083:34473:51276:97308:6270:45944:31167:8298:55:6449:27:34462:1902775:44416:42274:463:48315:9409:71039:447:2182:462:42254:71216:71038:1905267:6547:42149:480:6310:30174:71040:31120:7163:71051:467:70476:8361:30010:6450:71036:70317:56:31118:51211:6614:71037:54:71049:6461:71035:470:1902626:44182:469:36180:495:34475:16567:42255:6414:19919:2109:32259:466:31054:973:16973:28:280:34476:33621:30490:19…
22613	ribonucleoprotein complex biogenesis	113 out of 636 genes, 17.8%	205 out of 10340 background genes, 2.0%	5.61e-81	0	AN0074:AN0092:AN0237:AN0247:AN0262:AN0305:AN0421:AN0465:AN0475:AN0647:AN0695:AN0745:AN0776:AN0796:AN0843:AN0946:AN10058:AN1013:rpf2:AN10352:AN10618:AN10712:AN10943:cgrA:AN1166:AN11773:AN1200:AN1215:AN1228:hscA:AN1319:AN1345:bop1:AN1434:AN1666:AN1949:AN1964:AN2079:AN2292:AN2734:nsa2:AN3056:rmtB:nop58:AN3172:spb4:AN3313:AN3413:AN3706:rrs1:AN3827:rps16:AN4087:AN4232:AN4298:AN4460:AN4469:AN4471:AN447…	398:51083:34473:51276:97308:6270:45944:31167:8298:55:6449:27:34462:1902775:44416:42274:463:48315:9409:71039:447:2182:462:42254:71216:71038:1905267:6547:42149:480:6310:30174:71040:31120:7163:71051:467:70476:8361:30010:6450:71036:70317:56:31118:51211:6614:71037:54:71049:6461:71035:470:1902626:44182:469:36180:495:34475:16567:6414:42255:19919:2109:32259:973:31054:466:16973:28:34476:280:33621:30490:19…
6364	rRNA processing	78 out of 636 genes, 12.3%	128 out of 10340 background genes, 1.2%	2.52e-59	0	AN0074:AN0092:AN0237:AN0247:AN0305:AN0421:AN0465:AN0475:AN0647:AN0695:AN0745:AN0776:AN0796:AN10352:AN10618:AN10943:cgrA:AN11773:AN1215:AN1228:hscA:AN1319:AN1345:bop1:AN1434:AN1949:AN1964:AN2079:AN2292:nsa2:AN3056:nop58:AN3172:spb4:AN3313:rrs1:AN4232:AN4298:AN4460:AN4471:AN4594:ssz1:AN4648:AN4771:AN4803:ubi1:AN5222:AN5340:AN5441:AN5520:AN5785:AN5789:AN5865:AN5871:AN5875:AN5960:AN6171:AN6310:AN6374…	398:51083:34473:97308:6270:31167:8298:55:27:34462:44416:42274:463:48315:71039:447:462:71216:71038:1905267:6547:42149:480:6310:30174:71040:31120:7163:71051:467:70476:8361:30010:6450:71036:70317:56:31118:51211:71037:54:71049:6461:71035:470:1902626:44182:469:36180:495:34475:16567:42255:2109:32259:973:31054:466:16973:28:34476:280:33621:30490:1904812:30702:8033:9267:6452:282:6267:6364:1990417:71044:21…
16072	rRNA metabolic process	80 out of 636 genes, 12.6%	140 out of 10340 background genes, 1.4%	8.73e-58	0	AN0074:AN0092:AN0237:AN0247:AN0305:AN0421:AN0465:AN0475:AN0647:AN0695:AN0745:AN0776:AN0796:AN10352:AN10618:AN10943:AN10970:cgrA:AN11773:AN1215:AN1228:hscA:AN1319:AN1345:bop1:AN1434:AN1949:AN1964:AN2079:AN2292:nsa2:AN3056:nop58:AN3172:spb4:AN3313:rrs1:AN3944:AN4232:AN4298:AN4460:AN4471:AN4594:ssz1:AN4648:AN4771:AN4803:ubi1:AN5222:AN5340:AN5441:AN5520:AN5785:AN5789:AN5865:AN5871:AN5875:AN5960:AN617…	398:51083:34473:6363:97308:6270:31167:8298:55:27:34462:44416:42274:463:48315:71039:447:462:71216:71038:1905267:6547:42149:480:6310:30174:71040:31120:7163:71051:467:70476:8361:30010:6450:71036:70317:56:31118:51211:71037:54:71049:6461:71035:470:1902626:44182:469:36180:495:34475:16567:42255:2109:32259:973:31054:466:16973:28:34476:280:33621:30490:1904812:30702:8033:9267:6452:282:6267:6364:122:1990417…
34470	ncRNA processing	91 out of 636 genes, 14.3%	197 out of 10340 background genes, 1.9%	2.32e-55	0	AN0074:AN0092:AN0128:AN0130:AN0141:AN0237:AN0247:AN0305:AN0421:AN0465:AN0475:AN0647:AN0695:AN0745:AN0757:AN0776:AN0796:AN0956:AN10352:AN10551:AN10618:AN10832:AN10943:cgrA:AN11773:AN1215:AN1228:hscA:AN1319:AN1345:bop1:AN1434:AN1949:AN1964:AN2079:AN2292:AN2451:AN2847:nsa2:AN3056:nop58:AN3172:spb4:AN3313:rrs1:AN4232:AN4298:AN4460:AN4471:AN4594:ssz1:AN4648:AN4771:AN4803:ubi1:AN4889:AN5222:AN5340:AN54…	398:51083:34473:6413:97308:32447:6270:31167:8298:55:27:34462:44416:42274:463:48315:71039:447:462:55114:71216:71038:1905267:6547:42149:480:6310:30174:71040:31120:7163:71051:467:70476:8361:30010:6450:6400:71036:70317:56:31118:51211:71037:54:71049:6461:71035:470:1902626:44182:469:36180:495:34475:16567:42255:2109:32259:973:31054:466:16973:28:34476:280:33621:30490:1904812:30702:8033:2098:2127:9267:645…
34660	ncRNA metabolic process	98 out of 636 genes, 15.4%	260 out of 10340 background genes, 2.5%	7.15e-50	0	AN0074:AN0092:AN0128:AN0130:AN0141:AN0237:AN0247:AN0305:AN0421:AN0465:AN0475:AN0647:AN0695:AN0745:AN0757:AN0776:AN0796:AN0956:AN10352:AN10551:AN10618:AN10712:AN10832:AN10943:AN10970:cgrA:AN11773:AN1215:AN1228:hscA:AN1319:AN1345:bop1:AN1434:AN1709:AN1949:AN1964:AN2079:AN2292:AN2415:AN2451:AN2747:AN2847:nsa2:AN3056:nop58:AN3172:spb4:AN3313:rrs1:AN3944:AN4232:AN4298:AN4460:AN4471:AN4594:ssz1:AN4648:…	398:51083:34473:6363:70184:6413:97308:70893:32447:6270:31167:8298:55:27:34462:44416:42274:463:48315:42797:71039:447:462:42254:55114:71216:71038:1905267:6547:42149:480:6310:30174:71040:31120:7163:71051:467:70476:8361:30010:6450:6400:71036:70317:56:31118:51211:34337:71037:54:71049:6461:71035:6360:470:1902626:44182:469:36180:495:34475:16567:42255:2109:32259:973:31054:466:16973:28:34476:280:33621:304…
44085	cellular component biogenesis	143 out of 636 genes, 22.5%	568 out of 10340 background genes, 5.5%	1.83e-49	0	AN0074:AN0092:AN0228:AN0237:AN0247:AN0262:AN0305:tubA:AN0421:AN0465:AN0475:AN0647:AN0695:H4.1:AN0745:AN0776:AN0796:AN0843:AN0946:AN10058:AN1013:rpf2:AN10237:AN10352:FKBP5:AN10618:AN1063:AN10712:AN10943:cgrA:AN1166:AN11773:AN1200:AN1215:AN1228:hscA:AN1319:AN1345:bop1:aspD:AN1434:plkA:AN1666:AN1949:AN1964:AN2079:AN2128:AN2292:rho4:AN2734:hhoA:AN2907:nsa2:AN3056:rmtB:ugmA:nop58:AN3172:spb4:AN3313:bi…	398:42243:43936:34473:31028:30071:1410:916:1903562:97308:6352:45944:6270:921:55:6913:27:1902775:6281:42274:463:48315:9409:90561:9272:1902542:48311:40009:32955:42254:6468:71038:30476:1905267:51056:30174:71040:1990813:742:8361:30010:226:6450:1990942:71036:43945:6038:16226:73:6614:86:6461:71035:7019:44406:1902626:44182:6334:917:6091:46827:6033:727:495:34508:7059:16567:320:90307:19919:2109:1903475:97…
10467	gene expression	166 out of 636 genes, 26.1%	823 out of 10340 background genes, 8.0%	4.53e-44	0	AN0074:AN0092:AN0128:AN0130:AN0141:AN0237:AN0247:AN0262:AN0278:AN0305:AN0312:AN0421:AN0433:AN0445:AN0465:AN0475:AN0570:AN0647:AN0695:H4.1:AN0745:AN0757:AN0776:AN0796:AN0843:AN0907:AN0956:AN1013:AN10182:AN10352:AN10416:rmtA:AN10551:AN10614:AN10618:AN10681:AN10740:AN10832:AN1084:AN10943:AN10970:cgrA:AN1122:AN11411:AN11419:AN1166:AN11773:AN1215:AN12246:AN1228:AN12419:hscA:AN1319:AN1345:bop1:AN1434:A…	398:34473:6363:70184:97308:70893:6352:6270:45944:55:27:42274:463:48315:43558:42797:42254:71038:1905267:30174:71040:43066:8361:30010:60567:6450:71036:34337:6461:71035:6360:1902626:44182:6334:495:43488:31929:16567:71470:2109:32543:973:31054:957:34476:280:6307:30490:6351:6366:30702:2183:2127:9267:282:6267:30488:6302:1990417:71044:2181:18195:6412:1990481:154:494:71042:747:70989:42273:6407:70301:36170…
6396	RNA processing	95 out of 636 genes, 14.9%	287 out of 10340 background genes, 2.8%	1.87e-42	0	AN0074:AN0092:AN0128:AN0130:AN0141:AN0237:AN0247:AN0305:AN0421:AN0465:AN0475:AN0647:AN0695:AN0745:AN0757:AN0776:AN0796:AN0956:AN10352:AN10551:AN10618:AN10832:AN10943:cgrA:AN11773:AN1215:AN1228:hscA:AN1319:AN1345:bop1:AN1434:AN1709:AN1949:AN1964:AN2079:rrp5:AN2292:AN2451:AN2847:nsa2:AN3056:nop58:AN3172:spb4:AN3313:rrs1:AN4232:AN4298:AN4460:AN4471:AN4594:ssz1:AN4648:AN4771:AN4803:ubi1:AN4889:AN5222…	398:34473:70184:97308:6270:55:27:42274:463:48315:71038:1905267:30174:71040:8361:30010:6450:71036:34337:6461:71035:1902626:44182:495:43488:16567:2109:973:31054:957:34476:280:30490:30702:2127:9267:282:6267:30488:6302:1990417:71044:2181:6412:1990481:154:494:71042:747:42273:6407:70301:36170:956:448:372:51083:6413:32447:31167:8298:34462:44416:71039:447:462:55114:71216:6547:42149:480:6310:31120:7163:71…
6412	translation	78 out of 636 genes, 12.3%	199 out of 10340 background genes, 1.9%	1.87e-40	0	AN0262:AN0278:AN0433:AN0445:AN0465:AN0570:AN0776:AN0843:AN0907:AN1013:AN10182:AN10416:AN10614:AN10681:AN10740:AN1084:AN1122:AN11411:AN11419:AN1166:AN12246:AN1228:hscA:AN1345:AN1709:AN1964:AN2275:AN2301:AN2734:AN2980:AN2997:AN3172:AN3411:AN3413:AN3832:rps16:AN4073:AN4087:rpl16a:AN4222:AN4259:AN4475:AN4494:AN4522:AN4594:ssz1:AN4794:AN4802:AN4803:ubi1:AN4916:AN5014:AN5222:AN5441:AN5715:AN5719:AN5960…	70184:97308:45944:27:42274:463:43558:42254:43066:6450:34337:44182:31929:16567:71470:2109:32543:6307:30490:2183:9267:30488:2181:6412:70989:6407:36170:448:372:16236:51083:288:6413:723:70125:2000678:6449:44416:2000679:447:2182:462:71216:42149:6310:71455:56:54:469:36180:42255:6414:28:6452:6364:43433:45903:461:6415:45860:18188:10620:1900153:1901487:35690
43043	peptide biosynthetic process	83 out of 636 genes, 13.1%	234 out of 10340 background genes, 2.3%	2.7e-39	0	AN0262:AN0278:AN0433:AN0445:AN0465:AN0570:AN0776:AN0843:AN0907:sidL:AN1013:AN10182:AN10416:AN10614:AN10681:AN10740:AN1084:AN1122:AN11411:AN11419:AN1166:AN12246:AN1228:hscA:AN1345:AN1709:AN1964:AN2275:AN2301:easA:easB:easD:AN2734:AN2980:AN2997:AN3172:AN3411:AN3413:AN3832:rps16:AN4073:AN4087:rpl16a:AN4222:AN4259:AN4475:AN4494:AN4522:AN4594:ssz1:AN4794:AN4802:AN4803:ubi1:AN4916:AN5014:AN5222:AN5441:…	70184:97308:45944:19290:27:42274:463:43558:2001310:1900617:1900805:42254:45461:19748:43066:6450:9847:34337:1900584:44182:31929:16567:1900557:71470:2109:1900772:32543:6307:30490:2183:19184:9267:30488:2181:6412:70989:6407:36170:448:9405:372:16236:51083:288:6413:723:70125:2000678:6449:44416:2000679:447:2182:462:10106:1900815:55114:71216:42149:6310:31505:71455:56:1900781:54:469:1900809:36180:42255:64…
42274	ribosomal small subunit biogenesis	46 out of 636 genes, 7.2%	70 out of 10340 background genes, 0.7%	3.83e-36	0	AN0247:AN0305:AN0421:AN0465:AN0475:AN0647:AN10618:AN1319:AN1345:AN1434:AN1949:AN1964:AN2079:AN2292:AN3056:nop58:AN3172:AN3313:rrs1:rps16:AN4298:AN4594:AN4803:ubi1:AN5222:AN5340:AN5441:AN5702:AN5785:AN5789:AN5875:AN5960:AN5979:AN6171:AN6556:AN6585:AN6632:AN6651:AN6679:AN7107:AN7305:AN7526:AN8870:AN9097:AN9398:AN9468	398:55:463:42274:1905267:6450:6461:16567:2109:30490:9267:282:2181:1990417:6412:154:42273:6407:36170:8298:34462:447:462:71216:6547:480:6310:70476:70317:56:469:36180:42255:16973:28:1904812:6364:45903:461:1900153:472:35690
6518	peptide metabolic process	83 out of 636 genes, 13.1%	255 out of 10340 background genes, 2.5%	5.04e-36	0	AN0262:AN0278:AN0433:AN0445:AN0465:AN0570:AN0776:AN0843:AN0907:sidL:AN1013:AN10182:AN10416:AN10614:AN10681:AN10740:AN1084:AN1122:AN11411:AN11419:AN1166:AN12246:AN1228:hscA:AN1345:AN1709:AN1964:AN2275:AN2301:easA:easB:easD:AN2734:AN2980:AN2997:AN3172:AN3411:AN3413:AN3832:rps16:AN4073:AN4087:rpl16a:AN4222:AN4259:AN4475:AN4494:AN4522:AN4594:ssz1:AN4794:AN4802:AN4803:ubi1:AN4916:AN5014:AN5222:AN5441:…	70184:97308:45944:19290:27:42274:463:43558:2001310:1900617:1900805:42254:45461:19748:43066:6450:9847:34337:1900584:44182:31929:16567:1900557:71470:2109:1900772:32543:6307:30490:2183:19184:9267:30488:2181:6412:70989:6407:36170:448:9405:372:16236:51083:288:6413:723:70125:2000678:6449:44416:2000679:447:2182:462:10106:1900815:55114:71216:42149:6310:31505:71455:56:1900781:54:469:1900809:36180:42255:64…
42273	ribosomal large subunit biogenesis	41 out of 636 genes, 6.4%	57 out of 10340 background genes, 0.6%	1.57e-34	0	AN0074:AN0237:AN0262:AN0776:AN0946:AN10058:AN1013:rpf2:AN10943:AN1166:AN1200:AN1215:AN1228:bop1:AN1949:AN2734:nsa2:spb4:rrs1:AN4232:AN4469:AN4471:AN4475:AN4560:AN4771:AN5177:AN5520:AN5702:AN5865:AN5871:AN6149:rpl3:AN6310:AN6374:AN6556:AN6612:AN6902:AN7674:AN8247:AN8491:AN8856	55:27:1902775:42274:463:9409:30174:8361:1902626:280:30702:9267:6267:1990417:2181:6412:747:42273:36170:956:448:51276:31167:8298:447:462:71216:480:54:470:36180:6414:42255:466:6364:16070:42493:472:35690
43604	amide biosynthetic process	84 out of 636 genes, 13.2%	290 out of 10340 background genes, 2.8%	3.4e-32	0	AN0262:AN0278:AN0433:AN0445:AN0465:AN0570:AN0776:AN0843:AN0907:sidL:AN1013:AN10182:AN10416:AN10614:AN10681:AN10740:AN1084:pabaB:AN1122:AN11411:AN11419:AN1166:AN12246:AN1228:hscA:AN1345:AN1709:AN1964:AN2275:AN2301:easA:easB:easD:AN2734:AN2980:AN2997:AN3172:AN3411:AN3413:AN3832:rps16:AN4073:AN4087:rpl16a:AN4222:AN4259:AN4475:AN4494:AN4522:AN4594:ssz1:AN4794:AN4802:AN4803:ubi1:AN4916:AN5014:AN5222:A…	70184:97308:45944:19290:27:42274:463:43558:2001310:1900617:1900805:42254:45461:19748:43066:6450:9847:34337:1900584:44182:31929:16567:1900557:71470:2109:1900772:32543:6307:30490:2183:19184:9267:30488:2181:6412:70989:6407:36170:448:9405:372:16236:51083:288:6413:723:70125:2000678:6449:44416:2000679:447:2182:462:10106:1900815:55114:71216:46656:42149:6310:31505:71455:56:1900781:54:469:1900809:36180:42…
30490	maturation of SSU-rRNA	40 out of 636 genes, 6.3%	60 out of 10340 background genes, 0.6%	1.56e-31	0	AN0247:AN0305:AN0421:AN0465:AN0475:AN10618:AN1319:AN1345:AN1434:AN1949:AN1964:AN2079:AN2292:AN3056:nop58:AN3172:AN3313:rrs1:AN4298:AN4594:AN4803:ubi1:AN5222:AN5340:AN5441:AN5785:AN5789:AN5875:AN5960:AN6556:AN6585:AN6632:AN6679:AN7107:AN7305:AN7526:AN8870:AN9097:AN9398:AN9468	398:55:463:1905267:6450:6461:16567:2109:30490:9267:282:2181:1990417:6412:154:42273:6407:36170:8298:34462:447:462:71216:6547:480:6310:70476:70317:56:469:36180:42255:16973:28:1904812:45903:461:1900153:472:35690
34641	cellular nitrogen compound metabolic process	207 out of 636 genes, 32.5%	1507 out of 10340 background genes, 14.6%	1.36e-29	0	AN0067:AN0074:AN0092:AN0128:AN0130:AN0141:AN0228:AN0237:AN0247:AN0262:AN0278:AN0305:AN0312:AN0357:AN0421:AN0433:AN0445:AN0465:AN0475:AN0490:AN0570:AN0647:AN0695:H4.1:AN0745:AN0757:AN0776:AN0796:AN0843:AN0907:AN0956:sidL:AN1013:pyrD:AN10182:AN10352:AN10416:AN10497:AN10551:AN10614:AN10618:AN10681:AN10712:AN10740:AN10832:AN10837:AN1084:AN10943:AN10970:pabaB:cgrA:AN1122:AN11411:AN11419:AN1166:AN11773…	70893:45944:19290:55:1902775:6281:463:48315:43558:7004:1900617:6325:42254:45461:30174:71040:71459:9113:43066:42787:51567:2000060:19563:8361:8295:1902626:44182:6334:6007:6091:6240:727:495:31929:71470:31054:957:34476:280:6307:6351:6366:30702:30466:2183:2127:19184:6267:6302:1990417:32265:154:71042:747:6730:51097:70301:9405:51083:46100:288:723:6015:2000678:34462:44416:35066:2000679:447:2182:6348:4317…
462	maturation of SSU-rRNA from tricistronic rRNA transcript (SSU-rRNA, 5.8S rRNA, LSU-rRNA)	36 out of 636 genes, 5.7%	52 out of 10340 background genes, 0.5%	4.26e-29	0	AN0305:AN0421:AN0465:AN0475:AN10618:AN1319:AN1345:AN1434:AN1949:AN1964:AN2079:AN2292:nop58:AN3172:AN3313:rrs1:AN4298:AN4594:AN4803:AN5222:AN5340:AN5441:AN5785:AN5789:AN5875:AN5960:AN6556:AN6585:AN6679:AN7107:AN7305:AN7526:AN8870:AN9097:AN9398:AN9468	55:463:1990417:154:34462:447:6547:480:70476:45903:472:398:1905267:6450:6461:9267:282:2181:6412:42273:6407:36170:8298:462:71216:6310:56:36180:42255:16973:28:461:35690
71840	cellular component organization or biogenesis	168 out of 636 genes, 26.4%	1111 out of 10340 background genes, 10.7%	9.86e-28	0	AN0074:AN0092:AN0203:AN0228:AN0237:AN0247:AN0262:AN0305:tubA:AN0421:AN0465:AN0475:AN0647:AN0695:H4.1:AN0745:AN0776:AN0796:cdc20:AN0843:AN0946:AN10058:AN1013:AN10137:rpf2:AN10237:AN10352:FKBP5:AN10614:AN10618:AN1063:AN10712:AN10943:cgrA:AN1166:AN11773:AN1200:AN1215:AN1228:hscA:AN1319:AN1345:bop1:aspD:AN1399:AN1434:plkA:AN1666:hepA:AN1949:AN1964:AN2054:AN2079:AN2128:AN2292:mad2:easA:rho4:AN2734:hho…	42243:6974:1410:45944:51312:72480:921:55:1902775:6281:463:48315:43558:7004:9272:1902542:48311:6325:32955:42254:30174:71040:71459:43066:42787:742:51567:2000060:8361:8295:44774:226:51754:6038:16226:73:51229:7019:1902626:44182:6334:917:6091:46827:6033:727:495:31929:320:71470:31054:34476:280:6307:1990598:30702:30466:19184:8105:412:6267:90529:1990417:1903477:154:71042:747:7097:70783:71574:1902408:3461…
43603	cellular amide metabolic process	85 out of 636 genes, 13.4%	339 out of 10340 background genes, 3.3%	1.6e-27	0	AN0262:AN0278:AN0433:AN0445:AN0465:AN0570:AN0776:AN0843:AN0907:sidL:AN1013:AN10182:AN10416:AN10614:AN10681:AN10740:AN1084:pabaB:AN1122:AN11411:AN11419:AN1166:AN12246:AN1228:hscA:AN1345:AN1709:AN1964:AN2275:AN2301:easA:easB:easD:AN2734:AN2980:AN2997:AN3172:AN3411:AN3413:AN3832:rps16:AN4073:AN4087:rpl16a:AN4222:AN4259:AN4475:AN4494:AN4522:AN4594:ssz1:AN4794:AN4802:AN4803:ubi1:AN4916:AN5014:AN5222:A…	45944:19290:463:43558:1900617:42254:45461:43066:44182:31929:71470:6307:2183:19184:9405:51083:288:723:2000678:44416:2000679:447:2182:9062:42149:71455:1900781:1900809:6414:6097:6452:45903:6415:18188:10620:1900153:70184:97308:27:42274:2001310:1900805:19748:15976:6450:9847:34337:1900584:16567:1900557:2109:1900772:32543:30490:9267:30488:2181:6412:70989:6407:36170:448:256:372:16236:6413:70125:6449:462:…
44260	cellular macromolecule metabolic process	205 out of 636 genes, 32.2%	1643 out of 10340 background genes, 15.9%	2.54e-23	0	AN0074:AN0092:AN0128:AN0130:AN0141:AN0228:AN0237:AN0247:AN0262:AN0278:AN0305:AN0312:AN0421:AN0433:AN0445:AN0465:AN0475:AN0570:AN0647:AN0695:H4.1:AN0745:AN0757:AN0776:AN0796:cdc20:AN0843:AN0905:AN0907:AN0956:AN1013:AN10182:AN10189:AN10352:AN10416:AN10433:FKBP5:AN10497:rmtA:AN10551:AN10614:AN10618:AN10681:AN10712:AN10740:AN10832:AN1084:AN10943:AN10970:sepL:cgrA:AN1122:AN11411:AN11419:AN1166:AN11773…	6974:70893:45944:72480:55:1902775:6281:463:48315:43558:7004:9272:1902542:6325:42254:30174:71040:71459:43066:42787:51567:2000060:8361:8295:51754:6038:51229:1902626:44182:6334:46827:727:495:31929:6511:320:71470:31054:957:34476:280:6307:6351:1990598:6366:30702:30466:2183:2127:412:6267:6302:90529:1990417:154:71042:747:1902408:160:51097:34613:6508:70301:9405:35246:30307:6012:51083:288:723:2000678:3446…
42255	ribosome assembly	27 out of 636 genes, 4.2%	40 out of 10340 background genes, 0.4%	7.12e-21	0	AN0262:AN0421:AN10058:AN1013:rpf2:AN1166:AN1200:AN2734:AN3172:spb4:rrs1:AN4232:AN4471:AN4475:AN4771:ubi1:AN5222:AN5715:AN5960:AN5979:AN6149:rpl3:AN6310:AN6632:AN6902:AN7305:AN8856	55:1902775:463:30174:8361:1902626:30702:6267:747:34462:447:480:6414:16070:1900153:472:27:9409:16567:2109:30490:9267:2181:6412:42273:6407:36170:956:462:71216:56:470:469:36180:42255:466:28:6364:461:35690
16070	RNA metabolic process	112 out of 636 genes, 17.6%	683 out of 10340 background genes, 6.6%	6.71e-20	0	AN0074:AN0092:AN0128:AN0130:AN0141:AN0237:AN0247:AN0305:AN0312:AN0421:AN0465:AN0475:AN0647:AN0695:H4.1:AN0745:AN0757:AN0776:AN0796:AN0956:AN10352:AN10551:AN10618:AN10712:AN10832:AN10943:AN10970:cgrA:AN11773:AN1215:AN1228:AN12419:hscA:AN1319:AN1345:bop1:AN1434:AN1709:AN1949:AN1964:AN2079:rrp5:AN2283:AN2292:AN2296:AN2415:AN2451:AN2747:AN2847:nsa2:AN3056:nop58:AN3172:spb4:AN3313:rrs1:AN3944:AN4232:A…	70893:45944:55:1902775:463:48315:42254:30174:71040:8361:1902626:44182:6334:495:31054:957:34476:280:6307:6351:6366:30702:2127:6267:6302:1990417:154:71042:747:70301:51083:288:2000678:34462:44416:2000679:447:6547:42149:480:467:70476:6400:71455:70317:1990516:31118:71049:6396:34475:33621:6452:122:16070:2940:45903:6415:18188:10620:1900153:42790:6357:472:398:34473:6363:70184:97308:6352:6270:27:42274:940…
43170	macromolecule metabolic process	210 out of 636 genes, 33.0%	1828 out of 10340 background genes, 17.7%	3.12e-19	0	AN0074:AN0092:AN0128:AN0130:AN0141:AN0228:AN0237:AN0247:AN0262:AN0278:AN0299:AN0305:AN0312:AN0421:AN0433:AN0445:AN0465:AN0475:AN0570:AN0647:AN0695:H4.1:AN0745:AN0757:AN0776:AN0796:cdc20:AN0843:AN0905:AN0907:AN0956:AN1013:AN10182:AN10189:AN10352:AN10416:AN10433:FKBP5:AN10497:rmtA:AN10551:AN10614:AN10618:AN10681:AN10712:AN10740:AN10832:AN1084:AN10943:AN10970:sepL:cgrA:AN1122:AN11411:AN11419:AN1166:…	6974:70893:45944:72480:55:1902775:6281:463:48315:43558:7004:9272:1902542:6325:42254:30174:71040:71459:43066:42787:51567:2000060:8361:8295:51754:6038:51229:1902626:44182:6334:46827:727:495:31929:6511:320:71470:31054:957:34476:280:6307:6351:1990598:6366:30702:30466:2183:2127:412:6267:6302:90529:1990417:154:71042:747:1902408:160:51097:34613:6508:70301:9405:35246:30307:6012:51083:288:723:2000678:3446…
70925	organelle assembly	35 out of 636 genes, 5.5%	85 out of 10340 background genes, 0.8%	8.66e-18	0	AN0262:AN0421:AN10058:AN1013:rpf2:AN1166:AN1200:aspD:plkA:AN2128:AN2734:AN3172:spb4:bimC:rrs1:AN4232:AN4471:AN4475:kipB:myoB:AN4771:ubi1:AN5222:AN5715:AN5960:AN5979:AN6149:rpl3:AN6310:klpA:AN6632:AN6902:AN7305:AN8187:AN8856	1410:45944:55:921:1902775:463:1902542:30174:742:8361:73:7019:1902626:46827:6033:320:30702:8105:6267:747:70783:1902408:35082:9405:30307:10938:51256:34462:51315:447:44878:30951:480:70317:1905116:910:6414:31031:51455:1902404:40023:16070:22:281:1900153:472:43936:31028:30071:1903562:27:9409:90561:6468:1990813:1990942:86:44406:7059:16567:90307:2109:1903475:30490:51228:9267:2181:6412:1902850:42273:6407:…
90304	nucleic acid metabolic process	126 out of 636 genes, 19.8%	900 out of 10340 background genes, 8.7%	1.34e-16	0	AN0074:AN0092:AN0128:AN0130:AN0141:AN0228:AN0237:AN0247:AN0305:AN0312:AN0421:AN0465:AN0475:AN0647:AN0695:H4.1:AN0745:AN0757:AN0776:AN0796:AN0956:AN10352:AN10497:AN10551:AN10614:AN10618:AN10712:AN10832:AN10943:AN10970:cgrA:AN11773:AN1215:AN1228:AN12419:hscA:AN1319:AN1345:bop1:AN1434:AN1709:hepA:AN1949:AN1964:AN2079:rrp5:AN2283:AN2292:AN2296:AN2415:AN2451:AN2747:AN2847:nsa2:AN3048:AN3056:nop58:AN31…	70893:45944:55:1902775:6281:463:48315:43558:7004:6325:42254:30174:71040:71459:43066:42787:51567:2000060:8361:8295:1902626:44182:6334:727:495:31929:31054:957:34476:280:6307:6351:6366:30702:30466:2127:6267:6302:1990417:154:71042:747:51097:70301:51083:288:723:2000678:34462:44416:35066:2000679:447:6348:6547:6303:42149:480:6260:467:70987:34501:70476:6400:71455:70317:1990516:31118:1902969:71049:6396:34…
6807	nitrogen compound metabolic process	239 out of 636 genes, 37.6%	2324 out of 10340 background genes, 22.5%	4.31e-16	0	AN0067:AN0074:AN0092:AN0128:AN0130:AN0141:AN0228:AN0237:AN0247:AN0262:AN0278:AN0299:AN0305:AN0312:AN0357:AN0421:AN0433:AN0445:AN0465:AN0475:AN0490:AN0570:AN0647:AN0695:H4.1:AN0745:AN0757:AN0776:AN0796:cdc20:AN0843:AN0905:AN0907:AN0956:sidL:AN1013:pyrD:AN10182:AN10189:AN10352:AN10416:AN10433:FKBP5:AN10497:rmtA:AN10551:AN10614:AN10618:AN10681:AN10712:AN10740:AN10832:AN10837:AN1084:AN10943:AN10970:p…	1900409:6974:70893:45944:19290:72480:55:1902775:6281:463:48315:43558:7004:1900617:1902542:6325:42254:45461:30174:71040:71459:9113:43066:42787:51567:6553:2000060:19563:8361:8295:51754:6038:51229:1902626:44182:6334:6007:6091:6240:46827:727:495:31929:6511:320:6527:71470:31054:957:34476:280:6307:6351:1990598:6366:30702:30466:2183:2127:19184:412:6267:6302:90529:1990417:32265:154:71042:747:1902408:160:…
22618	ribonucleoprotein complex assembly	30 out of 636 genes, 4.7%	68 out of 10340 background genes, 0.7%	5.01e-16	0	AN0262:AN0421:AN10058:AN1013:rpf2:AN1166:AN1200:AN2734:AN3172:spb4:rrs1:AN4232:AN4471:AN4475:AN4560:AN4771:ubi1:AN5222:AN5715:AN5865:AN5960:AN5979:AN6149:rpl3:AN6310:AN6632:AN6902:AN7305:AN8491:AN8856	55:1902775:463:30174:8361:1902626:30702:6267:747:34462:447:480:6414:16070:1900153:472:27:9409:16567:2109:30490:9267:2181:6412:42273:6407:36170:956:462:71216:56:54:470:469:36180:42255:466:28:6364:461:35690
71826	ribonucleoprotein complex subunit organization	30 out of 636 genes, 4.7%	71 out of 10340 background genes, 0.7%	2.25e-15	0	AN0262:AN0421:AN10058:AN1013:rpf2:AN1166:AN1200:AN2734:AN3172:spb4:rrs1:AN4232:AN4471:AN4475:AN4560:AN4771:ubi1:AN5222:AN5715:AN5865:AN5960:AN5979:AN6149:rpl3:AN6310:AN6632:AN6902:AN7305:AN8491:AN8856	55:1902775:463:30174:8361:1902626:30702:6267:747:34462:447:480:6414:16070:1900153:472:27:9409:16567:2109:30490:9267:2181:6412:42273:6407:36170:956:462:71216:56:54:470:469:36180:42255:466:28:6364:461:35690
460	maturation of 5.8S rRNA	25 out of 636 genes, 3.9%	48 out of 10340 background genes, 0.5%	2.9e-15	0	AN0237:AN0305:AN0421:AN0475:AN0776:AN10618:AN11773:AN1434:nsa2:nop58:AN3172:rrs1:AN4298:AN4471:AN5340:AN5441:AN5785:AN5789:AN5875:AN6556:AN6612:AN7107:AN7305:AN8247:AN9398	55:463:71040:31054:34476:71042:34462:447:480:467:70476:71049:34475:33621:472:34473:27:71038:1905267:71036:6461:71035:973:9267:282:71044:2181:6412:42273:6407:36170:448:8298:71039:71216:71051:56:71037:36180:42255:466:16973:28:461:35690
466	maturation of 5.8S rRNA from tricistronic rRNA transcript (SSU-rRNA, 5.8S rRNA, LSU-rRNA)	25 out of 636 genes, 3.9%	48 out of 10340 background genes, 0.5%	2.9e-15	0	AN0237:AN0305:AN0421:AN0475:AN0776:AN10618:AN11773:AN1434:nsa2:nop58:AN3172:rrs1:AN4298:AN4471:AN5340:AN5441:AN5785:AN5789:AN5875:AN6556:AN6612:AN7107:AN7305:AN8247:AN9398	55:463:71040:31054:34476:71042:34462:447:480:467:70476:71049:34475:33621:472:34473:27:71038:1905267:71036:6461:71035:973:9267:282:71044:2181:6412:42273:6407:36170:448:8298:71039:71216:71051:56:71037:36180:42255:466:16973:28:461:35690
1901566	organonitrogen compound biosynthetic process	104 out of 636 genes, 16.4%	696 out of 10340 background genes, 6.7%	3.58e-15	0	AN0067:AN0128:AN0130:AN0262:AN0278:AN0433:AN0445:AN0465:AN0490:AN0570:AN0776:AN0843:AN0907:sidL:AN1013:pyrD:AN10182:AN10416:AN10614:AN10681:AN10740:AN10837:AN1084:pabaB:AN1122:AN11411:AN11419:AN1166:AN12246:AN1228:hscA:AN1263:AN1345:oliC:AN1709:AN1964:AN2275:AN2301:easA:easB:easD:AN2734:AN2980:AN2997:AN3172:AN3411:AN3413:AN3593:AN3832:AN3846:rps16:AN4073:AN4087:rpl16a:AN4222:AN4259:AN4290:AN4475:…	45944:19290:463:48315:43558:1900617:42254:45461:9113:43066:6553:8295:6038:44182:6091:6240:31929:71470:280:6307:2183:19184:90529:32265:6730:9405:6012:51083:46100:288:723:2000678:44416:2000679:19878:447:2182:43173:42149:71472:6031:71455:6221:70317:1900781:1900809:6414:6139:19354:6506:6452:45903:6641:6415:18188:10620:1900153:43936:9116:916:70184:19510:97308:27:42274:2001310:6754:40009:1900805:19748:…
6139	nucleobase-containing compound metabolic process	141 out of 636 genes, 22.2%	1140 out of 10340 background genes, 11.0%	4.8e-14	0	AN0067:AN0074:AN0092:AN0128:AN0130:AN0141:AN0228:AN0237:AN0247:AN0305:AN0312:AN0357:AN0421:AN0465:AN0475:AN0490:AN0647:AN0695:H4.1:AN0745:AN0757:AN0776:AN0796:AN0956:pyrD:AN10352:AN10497:AN10551:AN10614:AN10618:AN10712:AN10832:AN10837:AN10943:AN10970:cgrA:AN11773:AN1215:AN1228:AN12419:pgkA:hscA:AN1263:AN1319:AN1345:bop1:AN1434:oliC:AN1709:hepA:acuF:AN1949:AN1964:AN2079:rrp5:AN2283:AN2292:AN2296:A…	70893:45944:55:1902775:6281:463:48315:43558:7004:6325:42254:30174:71040:71459:9113:43066:42787:51567:2000060:19563:8361:8295:1902626:44182:6334:6007:6091:6240:727:495:31929:31054:957:34476:280:6307:6351:6366:30702:30466:2127:6267:6302:1990417:32265:154:71042:747:6730:51097:70301:51083:46100:288:723:6015:2000678:34462:44416:35066:2000679:447:6348:43173:6547:6303:42149:480:6260:467:70987:71472:3450…
44238	primary metabolic process	263 out of 636 genes, 41.4%	2759 out of 10340 background genes, 26.7%	9.22e-14	0	AN0067:AN0074:AN0092:AN0128:AN0130:AN0141:AN0228:AN0237:AN0247:AN0262:AN0278:AN0299:AN0305:AN0312:CYP680A1:AN0357:AN0421:AN0433:AN0445:AN0465:AN0475:AN0490:AN0570:AN0647:AN0695:H4.1:AN0745:AN0757:AN0776:AN0796:cdc20:AN0843:AN0851:AN0905:AN0907:AN0956:AN1013:pyrD:AN10182:AN10189:AN10352:AN10416:AN10433:FKBP5:AN10497:rmtA:AN10551:AN10614:AN10618:AN10648:AN10681:AN10712:AN10740:AN10832:AN10837:AN108…	1900409:6974:6490:70893:45944:72480:55:1902775:6281:463:48315:43558:7004:9272:1900617:1902542:6325:42254:45461:30174:71040:71459:9113:43066:42787:51567:6553:2000060:19563:8361:8295:51754:6038:51229:1902626:44182:6334:6007:6091:6240:6071:46827:727:495:31929:6511:320:6527:71470:31054:957:34476:280:6307:6351:1990598:6366:30702:30466:2183:2127:19184:412:6267:6302:90529:1990417:32265:154:71042:747:820…
34645	cellular macromolecule biosynthetic process	102 out of 636 genes, 16.0%	716 out of 10340 background genes, 6.9%	2.37e-13	0	AN0228:AN0262:AN0278:AN0312:AN0433:AN0445:AN0465:AN0570:H4.1:AN0776:AN0843:AN0907:AN1013:AN10182:AN10416:AN10497:AN10614:AN10681:AN10740:AN1084:AN10970:AN1122:AN11411:AN11419:AN1166:AN12246:AN1228:AN12419:hscA:AN1345:AN1709:AN1964:AN2275:AN2283:AN2296:AN2301:AN2415:AN2734:AN2747:AN2980:AN2997:ugmA:AN3172:AN3411:AN3413:AN3832:AN3846:AN3944:rps16:AN4073:AN4087:rpl16a:AN4222:AN4259:AN4475:AN4494:AN4…	70893:45944:463:48315:43558:7004:9272:42254:30174:43066:8295:6038:44182:6334:727:31929:71470:280:6307:6351:6366:30702:2183:6267:90529:51097:9405:6012:51083:288:723:2000678:44416:2000679:447:2182:42149:6260:70987:6031:71455:1990516:1902969:6414:6506:6452:122:16070:45903:70592:6415:18188:10620:1900153:42790:43936:6363:916:70184:97308:6352:6270:27:42274:42797:40009:6450:9847:34337:6360:16567:2109:32…
9059	macromolecule biosynthetic process	102 out of 636 genes, 16.0%	729 out of 10340 background genes, 7.1%	8.25e-13	0	AN0228:AN0262:AN0278:AN0312:AN0433:AN0445:AN0465:AN0570:H4.1:AN0776:AN0843:AN0907:AN1013:AN10182:AN10416:AN10497:AN10614:AN10681:AN10740:AN1084:AN10970:AN1122:AN11411:AN11419:AN1166:AN12246:AN1228:AN12419:hscA:AN1345:AN1709:AN1964:AN2275:AN2283:AN2296:AN2301:AN2415:AN2734:AN2747:AN2980:AN2997:ugmA:AN3172:AN3411:AN3413:AN3832:AN3846:AN3944:rps16:AN4073:AN4087:rpl16a:AN4222:AN4259:AN4475:AN4494:AN4…	70893:45944:463:48315:43558:7004:9272:42254:30174:43066:8295:6038:44182:6334:727:31929:71470:280:6307:6351:6366:30702:2183:6267:90529:51097:9405:6012:51083:288:723:2000678:44416:2000679:447:2182:42149:6260:70987:6031:71455:1990516:1902969:6414:6506:6452:122:16070:45903:70592:6415:18188:10620:1900153:42790:43936:6363:916:70184:97308:6352:6270:27:42274:42797:40009:6450:9847:34337:6360:16567:2109:32…
447	endonucleolytic cleavage in ITS1 to separate SSU-rRNA from 5.8S rRNA and LSU-rRNA from tricistronic rRNA transcript (SSU-rRNA, 5.8S rRNA, LSU-rRNA)	18 out of 636 genes, 2.8%	28 out of 10340 background genes, 0.3%	9.92e-13	0	AN0305:AN0421:AN0475:AN10618:AN1434:nop58:AN3172:rrs1:AN4298:AN5340:AN5441:AN5785:AN5789:AN5875:AN6556:AN7107:AN7305:AN9398	55:34462:447:480:70476:472:1905267:6461:9267:282:2181:6412:42273:6407:36170:8298:71216:56:36180:42255:16973:28:461:35690
44237	cellular metabolic process	264 out of 636 genes, 41.5%	2829 out of 10340 background genes, 27.4%	1.4e-12	0	AN0067:AN0074:AN0092:AN0128:AN0130:AN0141:AN0228:AN0237:AN0247:AN0262:AN0278:AN0305:AN0312:AN0357:AN0421:AN0433:AN0445:AN0465:AN0475:AN0490:AN0570:AN0647:AN0695:H4.1:AN0745:AN0757:AN0776:AN0796:cdc20:AN0843:AN0905:AN0907:AN0956:sidL:AN1013:pyrD:AN10182:AN10189:AN10237:AN10352:AN10416:AN10433:FKBP5:AN10497:rmtA:AN10551:AN10614:AN10618:AN1063:AN10648:AN10681:AN10712:AN10740:AN10832:AN10837:AN1084:n…	1900409:6974:6490:70893:45944:19290:72480:55:1902775:6281:463:48315:43558:7004:9272:1900617:1902542:6325:42254:45461:30174:71040:71459:9113:43066:42787:51567:6553:2000060:19563:8361:8295:51754:6038:16226:51229:1902626:44182:6334:6007:6091:6240:6071:46827:727:495:31929:6511:320:6527:71470:71451:31054:957:34476:280:6307:6351:1990598:6366:30702:30466:2183:2127:19184:412:6267:6302:90529:1990417:32265…
469	cleavage involved in rRNA processing	22 out of 636 genes, 3.5%	45 out of 10340 background genes, 0.4%	1.84e-12	0	AN0305:AN0421:AN0475:AN0776:AN10618:AN11773:AN1434:nop58:AN3172:rrs1:AN4298:AN5340:AN5441:AN5785:AN5789:AN5875:AN6556:AN6632:AN7107:AN7305:nop10:AN9398	55:71040:31054:34476:71042:34462:447:480:467:70476:31118:71049:34475:33621:1900153:472:34473:71038:1905267:71036:6461:71035:973:30490:9267:282:71044:2181:6412:42273:6407:36170:448:8298:71039:71216:31120:71051:56:71037:469:36180:42255:16973:28:461:35690
44271	cellular nitrogen compound biosynthetic process	109 out of 636 genes, 17.1%	816 out of 10340 background genes, 7.9%	1.98e-12	0	AN0067:AN0262:AN0278:AN0312:AN0433:AN0445:AN0465:AN0490:AN0570:H4.1:AN0776:AN0843:AN0907:sidL:AN1013:pyrD:AN10182:AN10416:AN10614:AN10681:AN10740:AN10837:AN1084:AN10970:pabaB:AN1122:AN11411:AN11419:AN1166:AN12246:AN1228:AN12419:hscA:AN1345:oliC:AN1709:AN1964:AN2275:AN2283:AN2296:AN2301:AN2415:easA:easB:easD:AN2734:AN2747:AN2980:AN2997:AN3172:AN3411:AN3413:AN3832:AN3846:AN3944:rps16:AN4073:AN4087:…	70893:45944:19290:463:43558:7004:1900617:42254:45461:9113:43066:8295:44182:6334:6091:6240:31929:71470:280:6307:6351:6366:2183:19184:32265:9405:51083:46100:288:723:6015:2000678:44416:2000679:447:2182:43173:6547:42149:70987:71472:71455:6221:70317:1900781:910:1900809:6414:6139:19354:6452:122:45903:6415:9165:18188:10620:1900153:42790:6363:9116:70184:97308:6352:27:42274:2001310:42797:6754:1900805:1974…
71428	rRNA-containing ribonucleoprotein complex export from nucleus	18 out of 636 genes, 2.8%	29 out of 10340 background genes, 0.3%	2.46e-12	0	AN0843:AN10618:AN10943:AN1215:hscA:AN1666:AN3172:AN3413:AN3706:rrs1:rps16:AN4087:AN5441:AN5715:AN5789:AN5865:AN5997:AN6632	55:463:1902626:44182:51083:44416:447:42149:480:70476:6452:45903:1900153:472:42274:6450:30490:282:2181:6412:42273:6407:56:54:469:42255:28:6364:461:42493:35690
27	ribosomal large subunit assembly	16 out of 636 genes, 2.5%	23 out of 10340 background genes, 0.2%	6.14e-12	0	AN0262:AN10058:AN1013:AN1166:AN1200:AN2734:spb4:AN4232:AN4471:AN4475:AN4771:AN6149:rpl3:AN6310:AN6902:AN8856	1902775:463:30174:8361:1902626:30702:6267:747:6414:16070:27:9409:9267:2181:6412:36170:956:71216:470:36180:466:6364:35690
479	endonucleolytic cleavage of tricistronic rRNA transcript (SSU-rRNA, 5.8S rRNA, LSU-rRNA)	19 out of 636 genes, 3.0%	34 out of 10340 background genes, 0.3%	6.26e-12	0	AN0305:AN0421:AN0475:AN0776:AN10618:AN1434:nop58:AN3172:rrs1:AN4298:AN5340:AN5441:AN5785:AN5789:AN5875:AN6556:AN7107:AN7305:AN9398	55:34462:447:480:70476:472:1905267:6461:9267:282:2181:6412:42273:6407:36170:448:8298:71216:56:36180:42255:16973:28:461:35690
1901360	organic cyclic compound metabolic process	163 out of 636 genes, 25.6%	1491 out of 10340 background genes, 14.4%	1.16e-11	0	AN0067:AN0074:AN0092:AN0128:AN0130:AN0141:AN0228:AN0237:AN0247:AN0305:AN0312:CYP680A1:AN0357:AN0421:AN0465:AN0475:AN0490:AN0647:AN0695:H4.1:AN0745:AN0757:AN0776:AN0796:AN0851:AN0956:pyrD:AN10352:AN10497:AN10551:AN10614:AN10618:AN10648:AN10712:AN10832:AN10837:AN10943:AN10970:pabaB:AN11081:cgrA:AN11773:AN1215:AN1228:AN12419:pgkA:hscA:AN1263:AN1319:AN1345:bop1:AN1434:oliC:AN1709:hepA:acuF:AN1949:AN1…	70893:45944:55:1902775:6281:463:48315:43558:7004:1900617:6325:42254:45461:30174:71040:71459:9113:43066:42787:51567:2000060:19563:8361:8295:1902626:44182:6334:6007:6091:6240:727:495:31929:31054:957:34476:280:6307:6351:6366:30702:30466:2127:19184:6267:6302:1990417:32265:154:71042:747:8202:6730:51097:70301:6694:9405:51083:46100:43935:288:723:6015:2000678:34462:44416:35066:2000679:447:6348:43173:6547…
478	endonucleolytic cleavage involved in rRNA processing	19 out of 636 genes, 3.0%	35 out of 10340 background genes, 0.3%	1.29e-11	0	AN0305:AN0421:AN0475:AN0776:AN10618:AN1434:nop58:AN3172:rrs1:AN4298:AN5340:AN5441:AN5785:AN5789:AN5875:AN6556:AN7107:AN7305:AN9398	55:34462:447:480:70476:472:1905267:6461:9267:282:2181:6412:42273:6407:36170:448:8298:71216:56:36180:42255:16973:28:461:35690
90502	RNA phosphodiester bond hydrolysis, endonucleolytic	19 out of 636 genes, 3.0%	36 out of 10340 background genes, 0.3%	2.58e-11	0	AN0305:AN0421:AN0475:AN0776:AN10618:AN1434:nop58:AN3172:rrs1:AN4298:AN5340:AN5441:AN5785:AN5789:AN5875:AN6556:AN7107:AN7305:AN9398	55:34462:447:480:70476:472:1905267:6461:9267:282:2181:6412:42273:6407:36170:448:8298:71216:56:36180:42255:16973:28:461:35690
46483	heterocycle metabolic process	151 out of 636 genes, 23.7%	1352 out of 10340 background genes, 13.1%	2.62e-11	0	AN0067:AN0074:AN0092:AN0128:AN0130:AN0141:AN0228:AN0237:AN0247:AN0305:AN0312:AN0357:AN0421:AN0465:AN0475:AN0490:AN0647:AN0695:H4.1:AN0745:AN0757:AN0776:AN0796:AN0956:pyrD:AN10352:AN10497:AN10551:AN10614:AN10618:AN10712:AN10832:AN10837:AN10943:AN10970:pabaB:cgrA:AN11773:AN1215:AN1228:AN12419:pgkA:hscA:AN1263:AN1319:AN1345:bop1:AN1434:oliC:AN1709:hepA:acuF:AN1949:AN1964:AN2079:rrp5:AN2283:AN2292:AN…	70893:45944:55:1902775:6281:463:48315:43558:7004:1900617:6325:42254:45461:30174:71040:71459:9113:43066:42787:51567:2000060:19563:8361:8295:1902626:44182:6334:6007:6091:6240:727:495:31929:31054:957:34476:280:6307:6351:6366:30702:30466:2127:19184:6267:6302:1990417:32265:154:71042:747:6730:51097:70301:9405:51083:46100:43935:288:723:6015:2000678:34462:44416:35066:2000679:447:6348:43173:6547:6303:9062…
9987	cellular process	315 out of 636 genes, 49.5%	3658 out of 10340 background genes, 35.4%	3.18e-11	0	tmpA:AN0067:AN0074:AN0092:AN0128:AN0130:AN0141:AN0203:AN0228:AN0237:AN0247:AN0262:AN0278:AN0305:AN0312:tubA:AN0357:AN0421:AN0433:AN0445:AN0465:AN0475:AN0490:AN0570:AN0647:sepM:AN0695:H4.1:AN0745:AN0757:AN0776:AN0796:cdc20:AN0843:AN0905:AN0907:AN0946:AN0956:AN10058:sidL:AN1013:pyrD:AN10137:AN10182:AN10189:rpf2:AN10237:AN10352:AN10416:AN10433:FKBP5:AN10497:rmtA:AN10551:AN10614:AN10618:AN1063:AN1064…	42243:1900409:6974:6490:1410:70893:45944:51312:19290:72480:921:55:1902775:6281:463:48315:43558:7004:9272:1900617:1902542:48311:70417:70791:6325:75306:32955:42254:45461:30174:71040:71459:9113:43066:42787:742:51567:6553:2000060:19563:8361:8295:44774:226:51754:6038:16226:73:51229:43405:7019:1902626:44182:6334:917:6007:6091:6240:6071:46827:6033:727:495:31929:6511:320:6527:32995:71470:71451:31054:957:…
6725	cellular aromatic compound metabolic process	149 out of 636 genes, 23.4%	1344 out of 10340 background genes, 13.0%	7.75e-11	0	AN0067:AN0074:AN0092:AN0128:AN0130:AN0141:AN0228:AN0237:AN0247:AN0305:AN0312:AN0357:AN0421:AN0465:AN0475:AN0490:AN0647:AN0695:H4.1:AN0745:AN0757:AN0776:AN0796:AN0956:pyrD:AN10352:AN10497:AN10551:AN10614:AN10618:AN10712:AN10832:AN10837:AN10943:AN10970:pabaB:cgrA:AN11773:AN1215:AN1228:AN12419:pgkA:hscA:AN1263:AN1319:AN1345:bop1:AN1434:oliC:AN1709:hepA:acuF:AN1949:AN1964:AN2079:rrp5:AN2283:AN2292:AN…	70893:45944:55:1902775:6281:463:48315:43558:7004:6325:42254:45461:30174:71040:71459:9113:43066:42787:51567:2000060:19563:8361:8295:1902626:44182:6334:6007:6091:6240:727:495:31929:31054:957:34476:280:6307:6351:6366:30702:30466:2127:19184:6267:6302:1990417:32265:154:71042:747:6730:51097:70301:9405:51083:46100:43935:288:723:6015:2000678:34462:44416:35066:2000679:447:6348:43173:6547:6303:42149:480:62…
90501	RNA phosphodiester bond hydrolysis	22 out of 636 genes, 3.5%	52 out of 10340 background genes, 0.5%	8.05e-11	0	AN0305:AN0421:AN0475:AN0776:AN10618:AN11773:AN1434:nop58:AN3172:rrs1:AN4298:AN5340:AN5441:AN5785:AN5789:AN5875:AN6556:AN6632:AN7107:AN7305:nop10:AN9398	55:71040:31054:34476:71042:34462:447:480:467:70476:31118:71049:34475:33621:1900153:472:34473:71038:1905267:71036:6461:71035:973:30490:9267:282:71044:2181:6412:42273:6407:36170:448:8298:71039:71216:31120:71051:56:71037:469:36180:42255:16973:28:461:35690
44267	cellular protein metabolic process	102 out of 636 genes, 16.0%	788 out of 10340 background genes, 7.6%	1.48e-10	0	AN0262:AN0278:AN0433:AN0445:AN0465:AN0570:AN0745:AN0776:cdc20:AN0843:AN0905:AN0907:AN1013:AN10182:AN10189:AN10416:AN10433:FKBP5:rmtA:AN10614:AN10681:AN10740:AN10832:AN1084:sepL:AN1122:AN11411:AN11419:AN1166:AN12246:AN1228:hscA:AN1345:plkA:AN1709:hepA:AN1964:AN2054:AN2275:AN2301:AN2734:mps1:AN2980:AN2997:rmtB:AN3172:AN3411:AN3413:AN3453:AN3832:sldA:rps16:AN4073:AN4087:hk-8-2:ffkF:rpl16a:AN4222:AN4…	6974:45944:72480:463:48315:43558:1902542:42254:71459:43066:42787:51567:2000060:51754:51229:44182:6334:46827:31929:6511:320:71470:6307:1990598:30466:2183:412:1902408:160:34613:6508:35246:30307:6012:51083:288:723:2000678:44416:30433:51315:2000679:447:2182:6348:415:44878:6547:35853:42149:34501:71455:1905116:30437:6457:1903464:6414:1902846:31031:90593:51455:6506:6470:6452:2000775:281:22:45903:1403:64…
470	maturation of LSU-rRNA	15 out of 636 genes, 2.4%	24 out of 10340 background genes, 0.2%	4.85e-10	0	AN0237:AN0776:AN10943:AN1215:AN1228:AN1949:nsa2:spb4:AN4232:AN4471:AN5520:AN6374:AN6612:AN8247:AN8491	55:463:8361:1902626:1990417:747:27:2181:6412:448:462:470:466:42493:35690
2181	cytoplasmic translation	19 out of 636 genes, 3.0%	41 out of 10340 background genes, 0.4%	5.49e-10	0	AN0278:AN0445:AN0570:AN0776:AN10182:AN10681:AN1166:hscA:AN2275:AN2734:AN2980:AN2997:AN3172:AN4259:ssz1:AN5719:AN5996:AN6563:AN9465	45944:42254:44182:71470:2183:51083:44416:447:2182:42149:6414:6452:97308:27:6450:9267:2181:6407:36170:448:16236:6449:71216:54:36180:28:6364:461:45860:35690
71704	organic substance metabolic process	272 out of 636 genes, 42.8%	3088 out of 10340 background genes, 29.9%	7.68e-10	0	AN0067:AN0074:AN0092:AN0128:AN0130:AN0141:AN0228:AN0237:AN0247:AN0262:AN0278:AN0299:AN0305:AN0312:CYP680A1:AN0357:AN0421:AN0433:AN0445:AN0465:AN0475:AN0490:AN0570:AN0647:AN0695:H4.1:AN0745:AN0757:AN0776:AN0796:cdc20:AN0843:AN0851:AN0905:AN0907:AN0956:sidL:AN1013:pyrD:AN10182:AN10189:AN10352:AN10416:AN10433:FKBP5:AN10497:rmtA:AN10551:AN10614:AN10618:AN10648:AN10681:AN10712:AN10740:AN10832:AN10837:…	1900409:6974:6490:70893:45944:19290:72480:55:1902775:6281:463:48315:43558:7004:9272:1900617:1902542:6325:42254:45461:30174:71040:71459:9113:43066:42787:51567:6553:2000060:19563:8361:8295:51754:6038:51229:1902626:44182:6334:6007:6091:6240:6071:46827:727:495:31929:6511:320:6527:71470:31054:957:34476:280:6307:6351:1990598:6366:30702:30466:2183:2127:19184:412:6267:6302:90529:1990417:32265:154:71042:7…
6403	RNA localization	23 out of 636 genes, 3.6%	63 out of 10340 background genes, 0.6%	9.25e-10	0	AN0843:rmtA:AN10618:AN10943:AN11773:AN1215:hscA:AN1666:AN3172:AN3413:AN3706:rrs1:rps16:AN4087:AN5441:AN5715:AN5789:AN5865:AN5997:AN6556:AN6632:AN6651:AN9398	55:463:71040:1902626:44182:31054:34476:71042:35246:51083:44416:447:42149:480:467:70476:71049:34475:33621:6452:45903:1900153:472:34473:42274:71038:60567:6450:71036:71035:973:30490:9267:282:2181:71044:18195:6412:42273:6407:36170:32968:8298:71039:71216:71051:56:71037:54:36180:469:6406:42255:16973:28:6364:461:42493:35690
34622	cellular macromolecular complex assembly	47 out of 636 genes, 7.4%	243 out of 10340 background genes, 2.4%	1.26e-09	0	AN0228:AN0262:tubA:AN0421:H4.1:AN10058:AN1013:rpf2:FKBP5:AN1063:AN1166:AN1200:aspD:rho4:AN2734:hhoA:AN2907:AN3172:spb4:H2A.X:rrs1:AN4232:AN4471:AN4475:AN4560:myoB:AN4771:ubi1:AN5222:AN5703:AN5715:AN5865:AN5960:AN5979:AN6149:rpl3:AN6310:AN6600:AN6632:tubC:AN6902:AN7260:AN7305:napB:AN8187:AN8491:AN8856	1410:55:921:1902775:463:6281:48311:32955:30174:8361:226:1902626:6334:917:6091:6033:727:280:30702:8105:412:6267:747:7097:70783:34613:9405:71963:70196:32436:34462:51418:35066:447:415:6303:480:34501:70317:30437:1902969:910:6457:6414:31991:32956:1902404:40023:16070:281:1900153:472:43936:6352:6270:6913:27:9409:90561:40009:44406:34508:16567:2109:7076:30490:915:9267:7264:2181:6412:42273:45739:6407:36170…
71166	ribonucleoprotein complex localization	21 out of 636 genes, 3.3%	56 out of 10340 background genes, 0.5%	5.02e-09	0	AN0843:rmtA:AN10618:AN10943:AN1215:hscA:AN1666:AN3172:AN3413:AN3706:rrs1:rps16:AN4087:AN5441:AN5715:AN5789:AN5865:AN5997:AN6632:AN6651:AN9398	55:463:1902626:44182:35246:51083:44416:447:42149:480:70476:6452:45903:1900153:472:42274:60567:6450:30490:9267:282:2181:18195:6412:42273:6407:36170:32968:71216:56:54:36180:469:6406:42255:16973:28:6364:461:42493:35690
71426	ribonucleoprotein complex export from nucleus	21 out of 636 genes, 3.3%	56 out of 10340 background genes, 0.5%	5.02e-09	0	AN0843:rmtA:AN10618:AN10943:AN1215:hscA:AN1666:AN3172:AN3413:AN3706:rrs1:rps16:AN4087:AN5441:AN5715:AN5789:AN5865:AN5997:AN6632:AN6651:AN9398	55:463:1902626:44182:35246:51083:44416:447:42149:480:70476:6452:45903:1900153:472:42274:60567:6450:30490:9267:282:2181:18195:6412:42273:6407:36170:32968:71216:56:54:36180:469:6406:42255:16973:28:6364:461:42493:35690
65003	macromolecular complex assembly	48 out of 636 genes, 7.5%	263 out of 10340 background genes, 2.5%	6.57e-09	0	AN0228:AN0262:tubA:AN0421:H4.1:AN10058:AN1013:rpf2:FKBP5:AN1063:AN1166:AN1200:aspD:rho4:AN2734:hhoA:AN2907:AN3172:spb4:H2A.X:rrs1:AN4232:AN4471:AN4475:AN4560:myoB:AN4771:ubi1:AN5222:AN5703:AN5715:AN5785:AN5865:AN5960:AN5979:AN6149:rpl3:AN6310:AN6600:AN6632:tubC:AN6902:AN7260:AN7305:napB:AN8187:AN8491:AN8856	1410:55:921:1902775:463:6281:48311:32955:30174:8361:226:1902626:6334:917:6091:6033:727:280:30702:8105:412:6267:747:7097:70783:34613:9405:71963:70196:32436:34462:51418:35066:447:415:6303:480:34501:70317:30437:1902969:910:6457:6414:31991:32956:1902404:40023:16070:281:1900153:472:43936:6352:6270:6913:27:9409:90561:40009:6461:44406:34508:16567:2109:7076:30490:915:9267:7264:2181:6412:42273:45739:6407:…
6405	RNA export from nucleus	21 out of 636 genes, 3.3%	57 out of 10340 background genes, 0.6%	7.5e-09	0	AN0843:rmtA:AN10618:AN10943:AN1215:hscA:AN1666:AN3172:AN3413:AN3706:rrs1:rps16:AN4087:AN5441:AN5715:AN5789:AN5865:AN5997:AN6632:AN6651:AN9398	55:463:1902626:44182:35246:51083:44416:447:42149:480:70476:6452:45903:1900153:472:42274:60567:6450:30490:9267:282:2181:18195:6412:42273:6407:36170:32968:71216:56:54:36180:469:6406:42255:16973:28:6364:461:42493:35690
51029	rRNA transport	10 out of 636 genes, 1.6%	11 out of 10340 background genes, 0.1%	8.07e-09	0	AN0843:AN3172:AN3413:AN3706:rps16:AN4087:AN5441:AN5715:AN5997:AN6632	447:45903:1900153:42274:30490:2181:6412:6407:56:469:42255:28:461
6407	rRNA export from nucleus	10 out of 636 genes, 1.6%	11 out of 10340 background genes, 0.1%	8.07e-09	0	AN0843:AN3172:AN3413:AN3706:rps16:AN4087:AN5441:AN5715:AN5997:AN6632	447:45903:1900153:42274:30490:2181:6412:6407:56:469:42255:28:461
90305	nucleic acid phosphodiester bond hydrolysis	22 out of 636 genes, 3.5%	63 out of 10340 background genes, 0.6%	8.24e-09	0	AN0305:AN0421:AN0475:AN0776:AN10618:AN11773:AN1434:nop58:AN3172:rrs1:AN4298:AN5340:AN5441:AN5785:AN5789:AN5875:AN6556:AN6632:AN7107:AN7305:nop10:AN9398	55:71040:31054:34476:71042:34462:447:480:467:70476:31118:71049:34475:33621:1900153:472:34473:71038:1905267:71036:6461:71035:973:30490:9267:282:71044:2181:6412:42273:6407:36170:448:8298:71039:71216:31120:71051:56:71037:469:36180:42255:16973:28:461:35690
6611	protein export from nucleus	21 out of 636 genes, 3.3%	58 out of 10340 background genes, 0.6%	1.11e-08	0	AN0843:rmtA:AN10618:AN10943:AN1215:hscA:AN1666:AN3172:AN3413:AN3706:rrs1:rps16:AN4087:AN5441:AN5715:AN5789:AN5865:AN5997:AN6632:AN6651:AN9398	55:463:1902626:44182:35246:51083:44416:447:42149:480:70476:6452:45903:1900153:472:42274:60567:6450:30490:9267:282:2181:18195:6412:42273:6407:36170:32968:71216:56:54:36180:469:6406:42255:16973:28:6364:461:42493:35690
19538	protein metabolic process	105 out of 636 genes, 16.5%	885 out of 10340 background genes, 8.6%	1.6e-08	0	AN0262:AN0278:AN0433:AN0445:AN0465:AN0570:AN0745:AN0776:cdc20:AN0843:AN0905:AN0907:AN1013:AN10182:AN10189:AN10416:AN10433:FKBP5:rmtA:AN10614:AN10681:AN10740:AN10832:AN1084:sepL:AN1122:AN11411:AN11419:AN1166:AN12246:AN1228:hscA:AN1345:plkA:AN1709:hepA:AN1964:AN2054:AN2237:AN2275:AN2301:AN2734:mps1:AN2980:AN2997:rmtB:AN3172:AN3411:AN3413:AN3453:AN3832:sldA:rps16:AN4073:AN4087:hk-8-2:ffkF:rpl16a:AN4…	6974:45944:72480:463:48315:43558:1902542:42254:71459:43066:42787:51567:2000060:51754:51229:44182:6334:46827:31929:6511:320:71470:6307:1990598:30466:2183:412:1902408:160:34613:6508:35246:30307:6012:51083:288:723:2000678:44416:30433:51315:2000679:447:2182:6348:415:44878:6547:35853:42149:34501:71455:1905116:30437:6457:1903464:6414:1902846:31031:90593:51455:6506:6470:6452:2000775:281:22:45903:1403:64…
50658	RNA transport	21 out of 636 genes, 3.3%	59 out of 10340 background genes, 0.6%	1.62e-08	0	AN0843:rmtA:AN10618:AN10943:AN1215:hscA:AN1666:AN3172:AN3413:AN3706:rrs1:rps16:AN4087:AN5441:AN5715:AN5789:AN5865:AN5997:AN6632:AN6651:AN9398	55:463:1902626:44182:35246:51083:44416:447:42149:480:70476:6452:45903:1900153:472:42274:60567:6450:30490:9267:282:2181:18195:6412:42273:6407:36170:32968:71216:56:54:36180:469:6406:42255:16973:28:6364:461:42493:35690
51168	nuclear export	21 out of 636 genes, 3.3%	59 out of 10340 background genes, 0.6%	1.62e-08	0	AN0843:rmtA:AN10618:AN10943:AN1215:hscA:AN1666:AN3172:AN3413:AN3706:rrs1:rps16:AN4087:AN5441:AN5715:AN5789:AN5865:AN5997:AN6632:AN6651:AN9398	55:463:1902626:44182:35246:51083:44416:447:42149:480:70476:6452:45903:1900153:472:42274:60567:6450:30490:9267:282:2181:18195:6412:42273:6407:36170:32968:71216:56:54:36180:469:6406:42255:16973:28:6364:461:42493:35690
51236	establishment of RNA localization	21 out of 636 genes, 3.3%	59 out of 10340 background genes, 0.6%	1.62e-08	0	AN0843:rmtA:AN10618:AN10943:AN1215:hscA:AN1666:AN3172:AN3413:AN3706:rrs1:rps16:AN4087:AN5441:AN5715:AN5789:AN5865:AN5997:AN6632:AN6651:AN9398	55:463:1902626:44182:35246:51083:44416:447:42149:480:70476:6452:45903:1900153:472:42274:60567:6450:30490:9267:282:2181:18195:6412:42273:6407:36170:32968:71216:56:54:36180:469:6406:42255:16973:28:6364:461:42493:35690
463	maturation of LSU-rRNA from tricistronic rRNA transcript (SSU-rRNA, 5.8S rRNA, LSU-rRNA)	13 out of 636 genes, 2.0%	21 out of 10340 background genes, 0.2%	2.21e-08	0	AN0237:AN0776:AN10943:AN1215:AN1228:AN1949:nsa2:AN4232:AN4471:AN6374:AN6612:AN8247:AN8491	55:463:8361:1902626:1990417:747:27:2181:6412:448:462:466:42493:35690
50657	nucleic acid transport	21 out of 636 genes, 3.3%	60 out of 10340 background genes, 0.6%	2.35e-08	0	AN0843:rmtA:AN10618:AN10943:AN1215:hscA:AN1666:AN3172:AN3413:AN3706:rrs1:rps16:AN4087:AN5441:AN5715:AN5789:AN5865:AN5997:AN6632:AN6651:AN9398	55:463:1902626:44182:35246:51083:44416:447:42149:480:70476:6452:45903:1900153:472:42274:60567:6450:30490:9267:282:2181:18195:6412:42273:6407:36170:32968:71216:56:54:36180:469:6406:42255:16973:28:6364:461:42493:35690
22607	cellular component assembly	60 out of 636 genes, 9.4%	392 out of 10340 background genes, 3.8%	3.31e-08	0	AN0228:AN0262:tubA:AN0421:H4.1:AN10058:AN1013:rpf2:AN10237:FKBP5:AN1063:AN1166:AN1200:aspD:plkA:AN2128:rho4:AN2734:hhoA:AN2907:AN3172:spb4:bimC:H2A.X:rrs1:AN4232:AN4471:AN4475:kipB:AN4560:myoB:AN4771:ubi1:AN4873:AN4963:AN5222:AN5703:AN5715:AN5785:AN5865:AN5960:AN5979:AN6149:rpl3:AN6310:klpA:AN6600:AN6632:AN6732:tubC:AN6902:chsA:AN7260:AN7305:napB:AN8187:AN8491:AN8856:AN9380:AN9463	42243:1410:45944:55:921:1902775:463:6281:48315:1902542:48311:32955:30174:742:8361:226:6038:16226:73:7019:1902626:6334:917:6091:46827:6033:727:320:280:30702:8105:412:6267:90529:1903477:747:7097:70783:71574:1902408:34613:35082:9405:30307:10938:71963:61166:51256:70196:32436:34462:51418:35066:51315:447:415:44878:43087:30951:6303:480:34501:6031:70317:60237:1905116:30437:1902969:910:6457:1903478:6414:3…
1901576	organic substance biosynthetic process	141 out of 636 genes, 22.2%	1386 out of 10340 background genes, 13.4%	2.91e-07	0	AN0067:AN0128:AN0130:AN0228:AN0262:AN0278:AN0312:AN0433:AN0445:AN0465:AN0490:AN0570:H4.1:AN0776:AN0843:AN0907:sidL:AN1013:pyrD:AN10182:AN10416:AN10497:AN10614:AN10648:AN10681:AN10740:AN10837:AN1084:AN10970:pabaB:AN11081:AN1122:AN11411:AN11419:AN1166:sasA:AN12246:AN1228:AN12419:pgkA:hscA:AN1263:AN1345:oliC:AN1709:acuF:AN1964:AN2275:AN2283:AN2296:AN2301:AN2415:easA:easB:easD:AN2734:AN2747:AN2980:AN…	6490:70893:45944:19290:463:48315:43558:7004:9272:1900617:42254:45461:30174:9113:43066:6553:19563:8295:6038:44182:6334:6007:6091:6240:727:31929:71470:280:6307:6351:6366:30702:2183:19184:6267:90529:32265:6730:51097:6694:9405:6012:51083:46100:43935:288:723:6015:2000678:44416:2000679:19878:447:2182:43173:6547:42149:6260:6979:70987:71472:6031:10913:71455:6221:70317:1990516:1900781:1902969:910:1900809:…
43933	macromolecular complex subunit organization	50 out of 636 genes, 7.9%	316 out of 10340 background genes, 3.1%	4.94e-07	0	AN0228:AN0262:tubA:AN0421:H4.1:AN10058:AN1013:rpf2:FKBP5:AN1063:AN1166:AN1200:aspD:rho4:AN2734:hhoA:AN2907:AN3172:spb4:H2A.X:rrs1:AN4232:AN4471:AN4475:kipB:AN4560:myoB:AN4771:ubi1:AN5222:AN5703:AN5715:AN5785:AN5865:AN5960:AN5979:AN6149:rpl3:AN6310:AN6600:AN6632:tubC:AN6902:AN7260:AN7305:AN7554:napB:AN8187:AN8491:AN8856	1410:55:921:1902775:463:6281:48311:32955:30174:8361:226:7019:1902626:6334:917:6091:6033:727:280:6307:30702:8105:412:6267:747:7097:70783:34613:35082:9405:10938:71963:288:70196:2000678:32436:34462:51418:35066:51315:2000679:447:415:6303:480:34501:70317:71455:30437:1902969:910:6457:6414:31991:32956:1902404:40023:16070:281:6415:18188:10620:1900153:472:43936:6352:6270:6913:27:9409:90561:40009:6461:4440…
51656	establishment of organelle localization	24 out of 636 genes, 3.8%	90 out of 10340 background genes, 0.9%	5.6e-07	0	AN10618:AN10943:AN1215:hscA:aspD:AN1666:nudK:AN2128:rho4:AN3124:bimC:rrs1:AN3910:sldA:AN4087:kipB:myoB:AN4963:cdcA:AN5789:AN5815:AN5865:klpA:AN6632	6974:1410:72480:921:55:463:48315:32955:742:51754:73:51229:7019:1902626:44182:917:6033:320:71470:1990598:8105:7097:70783:34613:35082:9405:10938:51083:1905121:61166:51256:51418:44416:51315:447:44878:35853:30951:42149:480:34501:70476:910:1902846:31031:31991:32956:6998:6470:1902404:6452:2000775:40023:22:281:1403:72370:1900153:472:43007:43936:98783:1903562:31536:6913:90561:40009:1902406:6450:1990942:4…
9451	RNA modification	21 out of 636 genes, 3.3%	72 out of 10340 background genes, 0.7%	1.13e-06	0	AN0128:AN0130:AN0141:AN0247:AN0695:AN0745:AN0757:AN0956:AN10551:AN10712:AN10832:AN2451:AN3313:AN4889:AN5789:AN5871:AN6604:AN8066:nop10:swoC:trm1	48315:42254:495:2127:6302:154:70301:447:6547:70476:6400:70317:31118:2940:6357:30010:282:30488:1990481:494:42273:6413:32447:31167:462:55114:31120:56:51211:469:1904812:8033:2098:1990258:6897:31591
9058	biosynthetic process	145 out of 636 genes, 22.8%	1472 out of 10340 background genes, 14.2%	1.5e-06	0	AN0067:AN0128:AN0130:AN0228:AN0262:AN0278:AN0312:AN0433:AN0445:AN0465:AN0490:AN0570:H4.1:AN0776:AN0843:AN0907:sidL:AN1013:pyrD:AN10182:AN10237:AN10416:AN10497:AN10614:AN10648:AN10681:AN10740:AN10837:AN1084:AN10970:pabaB:AN11081:AN1122:AN11411:AN11419:AN1166:sasA:AN12246:AN1228:AN12419:pgkA:hscA:AN1263:AN1345:oliC:AN1709:acuF:AN1964:AN2275:AN2283:AN2296:AN2301:AN2415:easA:easB:easD:AN2734:AN2747:A…	6490:70893:45944:19290:463:48315:43558:7004:9272:1900617:42254:45461:30174:9113:43066:6553:19563:8295:6038:16226:44182:6334:6007:6091:6240:727:31929:71470:280:6307:6351:6366:30702:2183:19184:6267:90529:32265:6730:51097:6694:9405:6012:51083:46100:43935:288:723:6015:2000678:44416:2000679:19878:447:2182:43173:6547:42149:6260:6979:70987:71472:6031:10913:71455:6221:70317:1990516:1900781:1902969:910:19…
34471	ncRNA 5'-end processing	10 out of 636 genes, 1.6%	15 out of 10340 background genes, 0.1%	1.75e-06	0	AN0305:AN0421:AN0475:AN10618:AN1434:nop58:AN4298:AN5785:AN6556:AN7305	34462:447:480:472:6461:9267:42273:36170:8298:71216:56:36180:35690
472	endonucleolytic cleavage to generate mature 5'-end of SSU-rRNA from (SSU-rRNA, 5.8S rRNA, LSU-rRNA)	10 out of 636 genes, 1.6%	15 out of 10340 background genes, 0.1%	1.75e-06	0	AN0305:AN0421:AN0475:AN10618:AN1434:nop58:AN4298:AN5785:AN6556:AN7305	34462:447:480:472:6461:9267:42273:36170:8298:71216:56:36180:35690
480	endonucleolytic cleavage in 5'-ETS of tricistronic rRNA transcript (SSU-rRNA, 5.8S rRNA, LSU-rRNA)	10 out of 636 genes, 1.6%	15 out of 10340 background genes, 0.1%	1.75e-06	0	AN0305:AN0421:AN0475:AN10618:AN1434:nop58:AN4298:AN5340:AN6556:AN7305	34462:447:480:472:9267:42273:36170:8298:71216:56:36180:35690
966	RNA 5'-end processing	10 out of 636 genes, 1.6%	15 out of 10340 background genes, 0.1%	1.75e-06	0	AN0305:AN0421:AN0475:AN10618:AN1434:nop58:AN4298:AN5785:AN6556:AN7305	34462:447:480:472:6461:9267:42273:36170:8298:71216:56:36180:35690
967	rRNA 5'-end processing	10 out of 636 genes, 1.6%	15 out of 10340 background genes, 0.1%	1.75e-06	0	AN0305:AN0421:AN0475:AN10618:AN1434:nop58:AN4298:AN5785:AN6556:AN7305	34462:447:480:472:6461:9267:42273:36170:8298:71216:56:36180:35690
51640	organelle localization	25 out of 636 genes, 3.9%	106 out of 10340 background genes, 1.0%	3.99e-06	0	tubA:AN10618:AN10943:AN1215:hscA:aspD:AN1666:nudK:AN2128:rho4:AN3124:bimC:rrs1:AN3910:sldA:AN4087:kipB:myoB:AN4963:cdcA:AN5789:AN5815:AN5865:klpA:AN6632	6974:1410:72480:921:55:463:48315:48311:32955:742:226:51754:73:51229:7019:1902626:44182:917:6033:320:71470:280:1990598:8105:7097:70783:34613:35082:9405:10938:71963:51083:1905121:61166:51256:51418:44416:51315:447:44878:35853:30951:42149:480:34501:70476:910:1902846:31031:31991:32956:6998:6470:1902404:6452:2000775:40023:22:281:1403:72370:1900153:472:43007:43936:98783:1903562:31536:6913:90561:40009:19…
44249	cellular biosynthetic process	134 out of 636 genes, 21.1%	1350 out of 10340 background genes, 13.1%	4.75e-06	0	AN0067:AN0228:AN0262:AN0278:AN0312:AN0433:AN0445:AN0465:AN0490:AN0570:H4.1:AN0776:AN0843:AN0907:sidL:AN1013:pyrD:AN10182:AN10237:AN10416:AN10497:AN10614:AN10648:AN10681:AN10740:AN10837:AN1084:AN10970:pabaB:AN1122:AN11411:AN11419:AN1166:sasA:AN12246:AN1228:AN12419:hscA:AN1263:AN1345:oliC:AN1709:AN1964:AN2275:AN2283:AN2296:AN2301:AN2415:easA:easB:easD:AN2734:AN2747:AN2980:AN2997:ugmA:AN3172:micA:AN…	70893:45944:19290:463:48315:43558:7004:9272:1900617:42254:45461:30174:9113:43066:6553:8295:6038:16226:44182:6334:6091:6240:727:31929:71470:280:6307:6351:6366:30702:2183:19184:6267:90529:32265:6730:51097:9405:6012:51083:46100:43935:288:723:6015:2000678:44416:2000679:19878:447:2182:43173:6547:42149:6260:6979:70987:71472:6031:10913:71455:6221:70317:1990516:1900781:1902969:910:1900809:6414:6139:19354…
15931	nucleobase-containing compound transport	22 out of 636 genes, 3.5%	89 out of 10340 background genes, 0.9%	1.37e-05	0	AN0843:rmtA:AN10618:AN10943:AN1215:hscA:AN1666:AN3172:AN3413:AN3706:rrs1:rps16:AN4064:AN4087:AN5441:AN5715:AN5789:AN5865:AN5997:AN6632:AN6651:AN9398	55:463:1902626:44182:6091:35246:51083:9060:44416:447:42149:480:6979:70476:6915:6452:45903:1900153:472:42274:9061:60567:6450:15886:1990544:30490:9267:282:2181:18195:6412:42273:6407:36170:32968:71216:56:15866:54:36180:469:6406:42255:16973:28:6364:461:42493:35690
6414	translational elongation	9 out of 636 genes, 1.4%	14 out of 10340 background genes, 0.1%	1.93e-05	0	AN10614:AN1084:hscA:AN2734:AN3832:ssz1:AN5719:AN5996:AN6563	45944:43558:42254:43066:44182:31929:51083:723:44416:2182:42149:6414:6452:97308:27:6450:32543:2181:70125:6449:54:6364:45860
6913	nucleocytoplasmic transport	22 out of 636 genes, 3.5%	91 out of 10340 background genes, 0.9%	2.13e-05	0	AN0843:rmtA:AN10618:AN10943:AN1215:hscA:AN1666:rho4:AN3172:AN3413:AN3706:rrs1:rps16:AN4087:AN5441:AN5715:AN5789:AN5865:AN5997:AN6632:AN6651:AN9398	55:463:32955:1902626:44182:917:7097:34613:35246:51083:51418:44416:447:42149:480:70476:910:31991:32956:6452:45903:1900153:472:43936:6913:42274:60567:6450:30490:915:9267:282:7264:2181:18195:6412:42273:6407:36170:32968:6886:71216:56:54:36180:469:6406:42255:8360:16973:28:31114:6364:461:42493:35690
51169	nuclear transport	22 out of 636 genes, 3.5%	92 out of 10340 background genes, 0.9%	2.64e-05	0	AN0843:rmtA:AN10618:AN10943:AN1215:hscA:AN1666:rho4:AN3172:AN3413:AN3706:rrs1:rps16:AN4087:AN5441:AN5715:AN5789:AN5865:AN5997:AN6632:AN6651:AN9398	55:463:32955:1902626:44182:917:7097:34613:35246:51083:51418:44416:447:42149:480:70476:910:31991:32956:6452:45903:1900153:472:43936:6913:42274:60567:6450:30490:915:9267:282:7264:2181:18195:6412:42273:6407:36170:32968:6886:71216:56:54:36180:469:6406:42255:8360:16973:28:31114:6364:461:42493:35690
28	ribosomal small subunit assembly	8 out of 636 genes, 1.3%	11 out of 10340 background genes, 0.1%	2.94e-05	0	AN0421:AN3172:ubi1:AN5222:AN5960:AN5979:AN6632:AN7305	34462:447:480:1900153:472:16567:2109:30490:2181:6412:6407:462:56:469:28:461
1901564	organonitrogen compound metabolic process	145 out of 636 genes, 22.8%	1553 out of 10340 background genes, 15.0%	5.53e-05	0	AN0067:AN0092:AN0128:AN0130:AN0262:AN0278:AN0299:AN0357:AN0433:AN0445:AN0465:AN0490:AN0570:AN0745:AN0776:cdc20:AN0843:AN0905:AN0907:sidL:AN1013:pyrD:AN10182:AN10189:AN10416:AN10433:FKBP5:rmtA:AN10614:AN10681:AN10740:AN10832:AN10837:AN1084:pabaB:sepL:AN1122:AN11411:AN11419:AN1166:sasA:AN12246:AN1228:pgkA:hscA:AN1263:AN1345:codA:plkA:oliC:AN1709:hepA:acuF:AN1964:AN2054:AN2237:AN2275:AN2301:easA:eas…	1900409:6974:45944:19290:72480:463:48315:43558:1900617:1902542:42254:45461:71459:9113:43066:42787:51567:6553:2000060:19563:8295:51754:6038:51229:44182:6334:6007:6091:6240:46827:31929:6511:320:6527:71470:280:6307:1990598:30466:2183:19184:412:90529:32265:154:1902408:160:6730:34613:6508:9405:35246:30307:6012:51083:46100:43935:288:723:6015:2000678:44416:30433:16998:51315:2000679:19878:447:2182:6348:4…
33750	ribosome localization	10 out of 636 genes, 1.6%	21 out of 10340 background genes, 0.2%	0.00014	0	AN10618:AN10943:AN1215:hscA:AN1666:rrs1:AN4087:AN5789:AN5865:AN6632	55:463:1902626:44182:51083:44416:447:42149:480:70476:6452:1900153:472:6450:30490:282:2181:6412:42273:6407:56:54:469:42255:28:6364:42493:35690
33753	establishment of ribosome localization	10 out of 636 genes, 1.6%	21 out of 10340 background genes, 0.2%	0.00014	0	AN10618:AN10943:AN1215:hscA:AN1666:rrs1:AN4087:AN5789:AN5865:AN6632	55:463:1902626:44182:51083:44416:447:42149:480:70476:6452:1900153:472:6450:30490:282:2181:6412:42273:6407:56:54:469:42255:28:6364:42493:35690
54	ribosomal subunit export from nucleus	10 out of 636 genes, 1.6%	21 out of 10340 background genes, 0.2%	0.00014	0	AN10618:AN10943:AN1215:hscA:AN1666:rrs1:AN4087:AN5789:AN5865:AN6632	55:463:1902626:44182:51083:44416:447:42149:480:70476:6452:1900153:472:6450:30490:282:2181:6412:42273:6407:56:54:469:42255:28:6364:42493:35690
70	mitotic sister chromatid segregation	17 out of 636 genes, 2.7%	66 out of 10340 background genes, 0.6%	0.00032	0	cdc20:AN10137:plkA:hepA:AN2128:AN3124:bimC:H2A.X:AN3910:sldA:kipB:cdcA:top2:AN5815:klpA:AN6600:AN8187	6974:45944:72480:6281:1902542:6325:71459:742:51567:51754:73:51229:7019:6334:46827:320:71470:1990598:30466:1902408:34613:35082:30307:10938:1905121:51256:51315:6348:44878:35853:30951:42149:34501:70317:1905116:910:1902846:31031:51455:6998:6470:2000775:281:22:1403:72370:7064:43007:43936:31028:98783:30071:1903562:31536:90561:1902406:1902440:6468:6306:1990813:1990141:1990942:6265:86:7094:33316:34508:70…
154	rRNA modification	8 out of 636 genes, 1.3%	14 out of 10340 background genes, 0.1%	0.00045	0	AN0247:AN0695:AN0745:AN3313:AN5789:AN5871:nop10:swoC	48315:495:154:447:6547:70476:70317:31118:30010:282:1990481:494:42273:31167:462:31120:56:51211:469:1904812:8033:1990258:6897
819	sister chromatid segregation	17 out of 636 genes, 2.7%	72 out of 10340 background genes, 0.7%	0.00125	0	cdc20:AN10137:plkA:hepA:AN2128:AN3124:bimC:H2A.X:AN3910:sldA:kipB:cdcA:top2:AN5815:klpA:AN6600:AN8187	6974:45944:72480:6281:1902542:6325:71459:742:51567:51754:73:51229:7019:6334:46827:320:71470:1990598:30466:1902408:34613:35082:30307:10938:1905121:51256:51315:6348:44878:35853:30951:42149:34501:70317:1905116:910:1902846:31031:51455:6998:6470:2000775:281:22:1403:72370:7064:43007:43936:31028:98783:30071:1903562:31536:90561:1902406:1902440:6468:6306:1990813:1990141:1990942:6265:86:7094:33316:34508:70…
6450	regulation of translational fidelity	6 out of 636 genes, 0.9%	8 out of 10340 background genes, 0.1%	0.00142	0	AN10681:hscA:AN1345:AN3413:ssz1:AN4803	44182:51083:44416:42149:6452:45903:97308:6450:2181:6412:6407:462:54:6364
140014	mitotic nuclear division	17 out of 636 genes, 2.7%	74 out of 10340 background genes, 0.7%	0.00189	0	cdc20:AN10137:plkA:hepA:AN2128:AN3124:bimC:H2A.X:AN3910:sldA:kipB:cdcA:top2:AN5815:klpA:AN6600:AN8187	6974:45944:72480:6281:1902542:6325:71459:742:51567:51754:73:51229:7019:6334:46827:320:71470:1990598:30466:1902408:34613:35082:30307:10938:1905121:51256:51315:6348:44878:35853:30951:42149:34501:70317:1905116:910:1902846:31031:51455:6998:6470:2000775:281:22:1403:72370:7064:43007:43936:31028:98783:30071:1903562:31536:90561:1902406:1902440:6468:6306:1990813:1990141:1990942:6265:86:7094:33316:34508:70…
280	nuclear division	22 out of 636 genes, 3.5%	116 out of 10340 background genes, 1.1%	0.00196	0	AN0074:tubA:cdc20:AN10137:AN1399:plkA:hepA:AN2128:mad2:AN3124:bimC:H2A.X:AN3846:AN3910:sldA:kipB:cdcA:top2:AN5815:klpA:AN6600:AN8187	6974:45944:51312:72480:6281:1902542:48311:6325:71459:742:51567:8295:44774:226:51754:73:51229:7019:6334:46827:320:71470:280:1990598:30466:1902408:34613:35082:30307:10938:71963:1905121:51256:51315:6348:44878:35853:30951:42149:34501:1905318:70317:1905116:910:1902846:31031:51455:6998:6470:2000775:281:22:1403:1990492:72370:7064:43007:43936:31028:98783:30071:1903562:31536:90561:1902406:1902440:6468:630…
6996	organelle organization	74 out of 636 genes, 11.6%	704 out of 10340 background genes, 6.8%	0.00301	0	AN0074:AN0203:AN0228:AN0262:tubA:AN0421:H4.1:AN0745:cdc20:AN10058:AN1013:AN10137:rpf2:FKBP5:AN10614:AN1063:AN1166:AN11773:AN1200:aspD:AN1399:plkA:hepA:AN2054:AN2128:mad2:rho4:AN2734:hhoA:AN3124:AN3172:spb4:bimC:H2A.X:rrs1:AN3846:AN3910:sldA:AN4232:AN4469:AN4471:AN4475:kipB:myoB:AN4771:ubi1:AN4963:cdcA:AN5222:top2:acoA:AN5648:AN5703:AN5715:AN5815:AN5960:AN5979:AN6149:rpl3:AN6310:klpA:AN6600:AN6632…	6974:1410:45944:51312:72480:55:921:1902775:463:6281:43558:7004:1902542:48311:6325:32955:30174:71040:71459:43066:42787:742:51567:2000060:8361:8295:44774:226:51754:73:51229:7019:1902626:6334:917:6091:46827:6033:727:31929:320:71470:31054:34476:280:1990598:30702:30466:8105:412:6267:1903477:71042:747:7097:70783:71574:1902408:34613:6508:35082:9405:30307:10938:71963:1905121:723:61166:51256:34462:44416:5…
8152	metabolic process	306 out of 636 genes, 48.1%	4092 out of 10340 background genes, 39.6%	0.00428	0	AN0054:AN0067:AN0074:AN0092:AN0128:AN0130:AN0141:AN0228:AN0237:AN0247:AN0262:AN0278:AN0299:AN0305:AN0312:CYP680A1:AN0357:AN0421:AN0433:AN0445:AN0465:AN0475:AN0490:AN0570:AN0647:AN0695:H4.1:AN0745:AN0757:AN0776:AN0796:cdc20:AN0843:AN0851:AN0905:AN0907:AN0956:sidL:AN1013:pyrD:AN10182:AN10189:AN10237:AN10352:AN10416:AN10433:FKBP5:AN10497:rmtA:AN10551:AN10614:AN10618:AN1063:AN10648:AN10681:AN10712:AN…	1900409:6974:6490:70893:45944:19290:72480:55:1902775:6281:463:48315:43558:7004:9272:1900617:1902542:6325:42254:45461:30174:71040:71459:9113:43066:42787:51567:6553:2000060:19563:8361:8295:51754:6038:16226:51229:1902626:44182:6334:6007:6091:6240:6071:46827:727:495:31929:6511:320:6527:71470:71451:31054:957:34476:280:6307:6351:1990598:6366:30702:30466:2183:2127:34599:19184:412:6267:6302:90529:1990417…
48285	organelle fission	22 out of 636 genes, 3.5%	123 out of 10340 background genes, 1.2%	0.00538	0	AN0074:tubA:cdc20:AN10137:AN1399:plkA:hepA:AN2128:mad2:AN3124:bimC:H2A.X:AN3846:AN3910:sldA:kipB:cdcA:top2:AN5815:klpA:AN6600:AN8187	6974:45944:51312:72480:6281:1902542:48311:6325:71459:742:51567:8295:44774:226:51754:73:51229:7019:6334:46827:320:71470:280:1990598:30466:1902408:34613:35082:30307:10938:71963:1905121:51256:51315:6348:44878:35853:30951:42149:34501:1905318:70317:1905116:910:1902846:31031:51455:6998:6470:2000775:281:22:1403:1990492:72370:7064:43007:43936:31028:98783:30071:1903562:31536:90561:1902406:1902440:6468:630…
98813	nuclear chromosome segregation	18 out of 636 genes, 2.8%	88 out of 10340 background genes, 0.9%	0.00558	0	cdc20:AN10137:AN1399:plkA:hepA:AN2128:AN3124:bimC:H2A.X:AN3910:sldA:kipB:cdcA:top2:AN5815:klpA:AN6600:AN8187	6974:45944:72480:6281:1902542:6325:71459:742:51567:51754:73:51229:7019:6334:46827:320:71470:1990598:30466:1902408:34613:35082:30307:10938:1905121:51256:51315:6348:44878:35853:30951:42149:34501:70317:1905116:910:1902846:31031:51455:6998:6470:2000775:281:22:1403:72370:7064:43007:43936:31028:98783:30071:1903562:31536:90561:1902406:1902440:6468:6306:1990813:1990141:1990942:6265:86:7094:33316:34508:70…
71459	protein localization to chromosome, centromeric region	7 out of 636 genes, 1.1%	15 out of 10340 background genes, 0.1%	0.01439	0	hepA:AN2054:H2A.X:sldA:cdcA:AN5815:AN6600	6974:72480:6281:71459:51567:51754:51229:6334:320:71470:1990598:30466:51315:6348:44878:35853:42149:34501:1902846:31031:6470:2000775:281:1403:72370:7064:98783:31536:1902406:6306:1990141:7094:33316:34508:7076:2000751:1902425:45739:7534:90699:920:30448:40008:61641:70:34503:45736:1990975:61587:7535:51316:35690
6417	regulation of translation	13 out of 636 genes, 2.0%	53 out of 10340 background genes, 0.5%	0.0146	0	AN10315:AN10614:AN10681:AN11773:hscA:AN1345:AN3055:AN3413:cpcB:ssz1:AN4803:AN6563:AN9093	45944:43558:70417:70791:42254:71040:43066:44182:31929:71470:32995:31054:34476:34198:71042:747:9405:51083:723:44416:2182:42149:467:71049:34475:6414:33621:6452:45903:70798:34473:97308:40009:31954:71038:6450:71036:71035:973:71044:2181:6412:60733:45727:6407:6449:71039:462:71051:71037:54:6521:6446:6364:35690
18216	peptidyl-arginine methylation	4 out of 636 genes, 0.6%	4 out of 10340 background genes, 0.0%	0.0152	0	AN10189:rmtA:rmtB:AN6072	42254:6508:35246:6547:60567:19919:18195:32968:6406:18216
910	cytokinesis	16 out of 636 genes, 2.5%	78 out of 10340 background genes, 0.8%	0.01785	0	sepM:sepL:aspD:plkA:AN2128:rho4:myoB:AN4963:cdcA:AN5789:AN5815:bud4:prs1:AN6732:chsA:AN9463	6974:1410:45944:921:48315:1902542:32955:6038:51229:917:46827:6033:320:71470:1990598:8105:90529:1903477:7097:70783:71574:1902408:34613:9405:30307:61166:6015:51418:447:6547:902:44878:35853:43087:42149:34501:70476:6031:1905116:30437:910:1903478:1902846:31031:31991:32956:51455:6470:1902404:2000775:40023:22:281:1403:9165:43936:31028:98783:30071:916:1903562:31536:6913:90561:1902406:6468:51056:1990813:8…
16043	cellular component organization	91 out of 636 genes, 14.3%	964 out of 10340 background genes, 9.3%	0.01835	0	AN0074:AN0203:AN0228:AN0262:tubA:AN0421:H4.1:AN0745:cdc20:AN10058:AN1013:AN10137:rpf2:AN10237:FKBP5:AN10614:AN1063:AN1166:AN11773:AN1200:aspD:AN1399:plkA:hepA:AN2054:AN2128:mad2:easA:rho4:AN2734:hhoA:AN2907:ugmA:AN3124:AN3172:spb4:bimC:H2A.X:rrs1:AN3846:AN3910:sldA:AN4232:AN4469:AN4471:AN4475:kipB:AN4560:myoB:AN4771:ubi1:AN4873:AN4963:cdcA:AN5222:top2:acoA:AN5648:AN5703:AN5715:AN5785:AN5815:AN586…	42243:6974:1410:45944:51312:72480:55:921:1902775:463:6281:48315:43558:7004:9272:1902542:48311:6325:32955:30174:71040:71459:43066:42787:742:51567:2000060:8361:8295:44774:226:51754:6038:16226:73:51229:7019:1902626:6334:917:6091:46827:6033:727:31929:320:71470:31054:34476:280:6307:1990598:30702:30466:19184:8105:412:6267:90529:1903477:71042:747:7097:70783:71574:1902408:34613:6508:35082:9405:30307:1093…
10608	posttranscriptional regulation of gene expression	14 out of 636 genes, 2.2%	62 out of 10340 background genes, 0.6%	0.01905	0	AN10315:AN10614:AN10681:AN11773:hscA:AN1345:AN3055:AN3413:cpcB:ssz1:AN4803:AN6540:AN6563:AN9093	45944:43558:70417:70791:42254:71040:43066:44182:31929:71470:32995:31054:957:34476:34198:71042:747:9405:51083:723:44416:2182:42149:467:71049:6396:34475:6414:33621:6452:45903:70798:34473:97308:40009:31954:71038:6450:71036:71035:43488:973:71044:2181:6412:60733:45727:6407:6449:71039:462:71051:71037:54:6521:6446:6364:35690
7059	chromosome segregation	18 out of 636 genes, 2.8%	96 out of 10340 background genes, 0.9%	0.01986	0	cdc20:AN10137:AN1399:plkA:hepA:AN2128:AN3124:bimC:H2A.X:AN3910:sldA:kipB:cdcA:top2:AN5815:klpA:AN6600:AN8187	6974:45944:72480:6281:1902542:6325:71459:742:51567:51754:73:51229:7019:6334:46827:320:71470:1990598:30466:1902408:34613:35082:30307:10938:1905121:51256:51315:6348:44878:35853:30951:42149:34501:70317:1905116:910:1902846:31031:51455:6998:6470:2000775:281:22:1403:72370:7064:43007:43936:31028:98783:30071:1903562:31536:90561:1902406:1902440:6468:6306:1990813:1990141:1990942:6265:86:7094:33316:34508:70…
8033	tRNA processing	15 out of 636 genes, 2.4%	72 out of 10340 background genes, 0.7%	0.02689	0.0002	AN0128:AN0130:AN0141:AN0745:AN0757:AN0956:AN10551:AN10832:AN2451:AN2847:AN4889:AN6604:AN7107:AN8066:trm1	2127:6302:70301:447:6400:2940:6357:1905267:30488:494:6413:32447:31167:55114:8033:2098:1990258:31591
32259	methylation	14 out of 636 genes, 2.2%	64 out of 10340 background genes, 0.6%	0.02796	0.0002	AN0092:AN0128:AN0130:AN0745:AN0757:AN10189:rmtA:hepA:rmtB:AN5789:AN5871:AN6072:AN8066:trm1	42254:71459:51567:30466:2127:6508:70301:35246:447:6348:6547:70476:2940:7064:6306:1990141:60567:19919:282:30488:18195:494:42273:7534:6413:32968:31167:40008:56:6406:18216:32259:8033:6364:1990258:7535:31591
1510	RNA methylation	8 out of 636 genes, 1.3%	22 out of 10340 background genes, 0.2%	0.03106	0.0002	AN0128:AN0130:AN0745:AN0757:AN5789:AN5871:AN8066:trm1	2127:70301:447:70476:2940:282:30488:494:42273:6413:31167:56:8033:1990258:31591
7017	microtubule-based process	16 out of 636 genes, 2.5%	83 out of 10340 background genes, 0.8%	0.04025	0.0002	tubA:AN10137:plkA:nudK:AN2128:rho4:AN3124:bimC:AN3721:kipB:myoB:cdcA:klpA:tubC:uncB:bimB	6974:45944:921:48315:1902542:48311:32955:742:226:73:51229:7019:917:46827:320:71470:280:1990598:7097:1902408:34613:6508:35082:30307:10938:71963:1905121:51256:51418:51315:44878:35853:30951:42149:34501:1905116:910:1902846:31031:31991:32956:51455:6470:1902404:22:1403:43936:31028:98783:30071:1903562:31536:6913:90561:7052:40009:1902406:1902440:6468:1990813:1990942:86:30473:7059:90307:1903475:51228:915:…
2. FungiFun (https://elbe.hki-jena.de/fungifun/fungifun.php)
FunCat ID	FunCat description	FunCat main category	Gene ID(s)	Exact p-value	Adjusted p-value	# genes / category	# genes / input
12.01	ribosome biogenesis	Protein synthesis	ANIA_00074 | ANIA_00204 | ANIA_00262 | ANIA_00445 | ANIA_00465 | ANIA_00475 | ANIA_00570 | ANIA_00583 | ANIA_00647 | ANIA_00695 | ANIA_00757 | ANIA_00776 | ANIA_00843 | ANIA_00844 | ANIA_00907 | ANIA_00946 | ANIA_01013 | ANIA_01122 | ANIA_01200 | ANIA_01215 | ANIA_01228 | ANIA_01319 | ANIA_01345 | ANIA_01366 | ANIA_01367 | ANIA_01434 | ANIA_01666 | ANIA_01964 | ANIA_02120 | ANIA_02275 | ANIA_0230…	3.0528e-102	1.1112e-99	120 / 173	120 / 645
12.01.01	ribosomal proteins	Protein synthesis	ANIA_00204 | ANIA_00262 | ANIA_00278 | ANIA_00421 | ANIA_00433 | ANIA_00445 | ANIA_00465 | ANIA_00570 | ANIA_00583 | ANIA_00647 | ANIA_00745 | ANIA_00776 | ANIA_00843 | ANIA_00907 | ANIA_01013 | ANIA_01122 | ANIA_01166 | ANIA_01200 | ANIA_01228 | ANIA_01256 | ANIA_01345 | ANIA_01954 | ANIA_01964 | ANIA_02147 | ANIA_02275 | ANIA_02301 | ANIA_02734 | ANIA_02980 | ANIA_03172 | ANIA_03176 | ANIA_0341…	6.5833e-68	1.1982e-65	94 / 163	94 / 645
12.04	translation	Protein synthesis	ANIA_00262 | ANIA_00278 | ANIA_00359 | ANIA_00421 | ANIA_00445 | ANIA_00465 | ANIA_00570 | ANIA_00776 | ANIA_00843 | ANIA_01013 | ANIA_01084 | ANIA_01122 | ANIA_01166 | ANIA_01228 | ANIA_01345 | ANIA_01964 | ANIA_02275 | ANIA_02301 | ANIA_02734 | ANIA_02932 | ANIA_02980 | ANIA_02989 | ANIA_02997 | ANIA_03055 | ANIA_03172 | ANIA_03411 | ANIA_03413 | ANIA_03706 | ANIA_04060 | ANIA_04073 | ANIA_0408…	6.6246e-50	8.0379e-48	82 / 173	82 / 645
11.04.01	rRNA processing	Transcription	ANIA_00074 | ANIA_00092 | ANIA_00204 | ANIA_00237 | ANIA_00305 | ANIA_00421 | ANIA_00475 | ANIA_00583 | ANIA_00589 | ANIA_00647 | ANIA_00695 | ANIA_00745 | ANIA_00757 | ANIA_00796 | ANIA_01215 | ANIA_01319 | ANIA_01367 | ANIA_01434 | ANIA_01949 | ANIA_01983 | ANIA_02077 | ANIA_02079 | ANIA_02147 | ANIA_02292 | ANIA_02734 | ANIA_02932 | ANIA_03167 | ANIA_03176 | ANIA_03313 | ANIA_03745 | ANIA_0379…	1.2927e-46	1.1764e-44	81 / 182	81 / 645
16.03.03	RNA binding	Protein with binding function or cofactor requirement (structural or analytic)	ANIA_00204 | ANIA_00262 | ANIA_00305 | ANIA_00310 | ANIA_00359 | ANIA_00421 | ANIA_00445 | ANIA_00475 | ANIA_00570 | ANIA_00583 | ANIA_00647 | ANIA_00695 | ANIA_00745 | ANIA_00776 | ANIA_00796 | ANIA_01013 | ANIA_01166 | ANIA_01434 | ANIA_01452 | ANIA_01983 | ANIA_02147 | ANIA_02847 | ANIA_02932 | ANIA_02989 | ANIA_03167 | ANIA_03176 | ANIA_03411 | ANIA_03427 | ANIA_03794 | ANIA_03938 | ANIA_0420…	2.1471e-26	1.5631e-24	79 / 302	79 / 645
11.02.01	rRNA synthesis	Transcription	ANIA_00074 | ANIA_00312 | ANIA_00421 | ANIA_00589 | ANIA_00647 | ANIA_00695 | ANIA_00745 | ANIA_01949 | ANIA_02283 | ANIA_02415 | ANIA_02747 | ANIA_03167 | ANIA_03176 | ANIA_03313 | ANIA_03745 | ANIA_03827 | ANIA_03944 | ANIA_04346 | ANIA_04456 | ANIA_04618 | ANIA_04865 | ANIA_06171 | ANIA_06558 | ANIA_07205 | ANIA_08073 | ANIA_08272 | ANIA_09102 | ANIA_10352 | ANIA_10970	8.1522e-16	4.9457e-14	29 / 71	29 / 645
11.06.01	rRNA modification	Transcription	ANIA_00092 | ANIA_00647 | ANIA_00695 | ANIA_00745 | ANIA_03167 | ANIA_03313 | ANIA_04298 | ANIA_04456 | ANIA_05340 | ANIA_06171 | ANIA_08254 | ANIA_08851 | ANIA_10352 | ANIA_10712	5.625e-13	2.925e-11	14 / 19	14 / 645
16.01	protein binding	Protein with binding function or cofactor requirement (structural or analytic)	ANIA_00067 | ANIA_00074 | ANIA_00228 | ANIA_00262 | ANIA_00278 | ANIA_00310 | ANIA_00316 | ANIA_00433 | ANIA_00445 | ANIA_00465 | ANIA_00570 | ANIA_00610 | ANIA_00647 | ANIA_00695 | ANIA_00745 | ANIA_00776 | ANIA_00796 | ANIA_00814 | ANIA_00843 | ANIA_01013 | ANIA_01063 | ANIA_01122 | ANIA_01166 | ANIA_01215 | ANIA_01228 | ANIA_01256 | ANIA_01345 | ANIA_01367 | ANIA_01394 | ANIA_01560 | ANIA_0166…	2.2891e-12	1.0415e-10	164 / 1435	164 / 645
12.04.01	translation initiation	Protein synthesis	ANIA_00359 | ANIA_01256 | ANIA_02907 | ANIA_02932 | ANIA_02997 | ANIA_03055 | ANIA_03411 | ANIA_04290 | ANIA_04908 | ANIA_05954 | ANIA_06651 | ANIA_07540 | ANIA_08066 | ANIA_10182	4.5805e-05	0.0018526	14 / 59	14 / 645
11.02.03	mRNA synthesis	Transcription	ANIA_00204 | ANIA_00745 | ANIA_01256 | ANIA_01319 | ANIA_01709 | ANIA_01949 | ANIA_01962 | ANIA_02296 | ANIA_02747 | ANIA_02907 | ANIA_03176 | ANIA_04456 | ANIA_04873 | ANIA_06085 | ANIA_06374 | ANIA_06585 | ANIA_07305 | ANIA_09090 | ANIA_10125	0.000178	0.0064792	19 / 108	19 / 645
16.21.08	Fe/S binding	Protein with binding function or cofactor requirement (structural or analytic)	ANIA_00896 | ANIA_01063 | ANIA_02332 | ANIA_02916 | ANIA_05111 | ANIA_05525 | ANIA_05703 | ANIA_08793 | ANIA_09093 | ANIA_09103	0.00028575	0.0091398	10 / 39	10 / 645
12.04.02	translation elongation	Protein synthesis	ANIA_01084 | ANIA_02734 | ANIA_03832 | ANIA_05719 | ANIA_05996 | ANIA_06563 | ANIA_06651 | ANIA_10315	0.00030131	0.0091398	8 / 26	8 / 645
12.07	translational control	Protein synthesis	ANIA_00421 | ANIA_01345 | ANIA_02932 | ANIA_03411 | ANIA_03413 | ANIA_04290 | ANIA_04330 | ANIA_04803 | ANIA_04865 | ANIA_05222 | ANIA_05770 | ANIA_06156 | ANIA_06540 | ANIA_06563 | ANIA_06585 | ANIA_09090	0.00057453	0.016087	16 / 91	16 / 645
42.10.07	nucleolus	Biogenesis of cellular components	ANIA_03167 | ANIA_03827 | ANIA_08851	0.0013458	0.033625	3 / 4	3 / 645
16.03	nucleic acid binding	Protein with binding function or cofactor requirement (structural or analytic)	ANIA_00204 | ANIA_00359 | ANIA_00583 | ANIA_00589 | ANIA_01452 | ANIA_01949 | ANIA_02932 | ANIA_02989 | ANIA_03096 | ANIA_03176 | ANIA_03427 | ANIA_04233 | ANIA_04873 | ANIA_04903 | ANIA_05111 | ANIA_05222 | ANIA_05526 | ANIA_06156 | ANIA_06374 | ANIA_06585 | ANIA_07538 | ANIA_09093 | ANIA_09406	0.0013856	0.033625	23 / 166	23 / 645
10.03.05.01	spindle pole body/centrosome and microtubule cycle	Cell cycle and DNA processing	ANIA_00316 | ANIA_02128 | ANIA_02847 | ANIA_02927 | ANIA_03363 | ANIA_04460 | ANIA_04513 | ANIA_05815 | ANIA_07540 | ANIA_08783	0.0016518	0.037199	10 / 48	10 / 645
34.05.02	motor activity	Interaction with the environment	ANIA_03124 | ANIA_03363 | ANIA_03721 | ANIA_04513 | ANIA_04706 | ANIA_04908 | ANIA_06863	0.0017373	0.037199	7 / 26	7 / 645
16.19.05	GTP binding	Protein with binding function or cofactor requirement (structural or analytic)	ANIA_00316 | ANIA_01084 | ANIA_01215 | ANIA_01322 | ANIA_01394 | ANIA_01666 | ANIA_02687 | ANIA_03832 | ANIA_04708 | ANIA_05865 | ANIA_06150 | ANIA_06266 | ANIA_06334 | ANIA_06563 | ANIA_06838 | ANIA_08631 | ANIA_10315	0.001944	0.039312	17 / 111	17 / 645
01.05.13	transfer of activated C-1 groups	Metabolism	ANIA_00092 | ANIA_00128 | ANIA_00130 | ANIA_00745 | ANIA_03096 | ANIA_03313 | ANIA_05789 | ANIA_05871 | ANIA_09406 | ANIA_10526	0.0022833	0.043743	10 / 50	10 / 645
16.19	nucleotide/nucleoside/nucleobase binding	Protein with binding function or cofactor requirement (structural or analytic)	ANIA_00316 | ANIA_00359 | ANIA_00421 | ANIA_00583 | ANIA_01215 | ANIA_01222 | ANIA_01246 | ANIA_01366 | ANIA_01394 | ANIA_01452 | ANIA_01560 | ANIA_01666 | ANIA_02054 | ANIA_02646 | ANIA_02687 | ANIA_02932 | ANIA_02989 | ANIA_03124 | ANIA_03176 | ANIA_03363 | ANIA_03396 | ANIA_03427 | ANIA_03721 | ANIA_03832 | ANIA_04233 | ANIA_04330 | ANIA_04346 | ANIA_04513 | ANIA_04706 | ANIA_04903 | ANIA_0540…	0.0027414	0.049893	41 / 372	41 / 645
Strain:	control
Stress:	diamide
Group:	up-regulated genes
1. AspGD Gene Ontology Term Finder (http://www.aspergillusgenome.org/cgi-bin/GO/goTermFinder)
GOID	GO_term	Cluster frequency	Background frequency	Corrected P-value	False discovery rate	Gene(s) annotated to the term	Directly Annotated GOID List
No significant ontology term can be found for input genes.
2. FungiFun (https://elbe.hki-jena.de/fungifun/fungifun.php)
FunCat ID	FunCat description	FunCat main category	Gene ID(s)	Exact p-value	Adjusted p-value	# genes / category	# genes / input
1.2	secondary metabolism	Metabolism	ANIA_00195 | ANIA_00201 | ANIA_00274 | ANIA_00330 | ANIA_00370 | ANIA_00374 | ANIA_00567 | ANIA_00992 | ANIA_01199 | ANIA_01505 | ANIA_01548 | ANIA_01650 | ANIA_01679 | ANIA_01680 | ANIA_02039 | ANIA_02349 | ANIA_02407 | ANIA_02559 | ANIA_02561 | ANIA_02746 | ANIA_02781 | ANIA_02891 | ANIA_02959 | ANIA_03017 | ANIA_03041 | ANIA_03220 | ANIA_03281 | ANIA_03805 | ANIA_03963 | ANIA_04363 | ANIA_0457…	5.4205e-9	1.6912e-06	83 / 1054	83 / 493
20.01.27	drug/toxin transport	Cellular transport, transport facilitation and transport routes	ANIA_00201 | ANIA_00374 | ANIA_02349 | ANIA_03041 | ANIA_04492 | ANIA_05369 | ANIA_05690 | ANIA_06019 | ANIA_06063 | ANIA_08077 | ANIA_08095 | ANIA_08340 | ANIA_08365 | ANIA_08459 | ANIA_10036 | ANIA_10207 | ANIA_10221 | ANIA_10958	0.00028561	0.040782	18 / 167	18 / 493
01.05.03	polysaccharide metabolism	Metabolism	ANIA_00799 | ANIA_01046 | ANIA_01273 | ANIA_01332 | ANIA_02018 | ANIA_02227 | ANIA_02633 | ANIA_02697 | ANIA_03418 | ANIA_03504 | ANIA_03727 | ANIA_04367 | ANIA_05176 | ANIA_05449 | ANIA_06324 | ANIA_06428 | ANIA_07199 | ANIA_07230 | ANIA_07349 | ANIA_08341 | ANIA_08761 | ANIA_10277	0.00039214	0.040782	22 / 232	22 / 493
Strain:	control
Stress:	diamide
Group:	down-regulated genes
1. AspGD Gene Ontology Term Finder (http://www.aspergillusgenome.org/cgi-bin/GO/goTermFinder)
GOID	GO_term	Cluster frequency	Background frequency	Corrected P-value	False discovery rate	Gene(s) annotated to the term	Directly Annotated GOID List
22613	ribonucleoprotein complex biogenesis	34 out of 352 genes, 9.7%	205 out of 10340 background genes, 2.0%	8.81e-12	0	AN0074:AN0421:AN0647:AN10164:AN10194:rpf2:AN10352:AN10712:AN11773:bop1:AN1533:AN1666:spb4:AN3313:rrs1:AN3827:AN4232:AN4298:AN4460:AN4648:AN4771:AN5177:AN5340:AN5865:AN5910:AN6067:AN6310:AN6556:AN6585:AN6612:AN6651:edc3:AN6902:AN7526	34473:32968:8298:6353:55:27:34462:31938:463:42274:33962:71039:447:31087:462:16570:42254:71038:45910:6547:480:30174:31120:71040:7163:467:71051:2001255:2001165:8361:45947:71036:1732:2001209:393:71037:54:71049:71035:470:6368:1902626:43488:34475:42255:466:31054:973:16973:280:34476:83:33621:184:30702:90262:2001173:31126:9267:6364:6267:122:71044:16070:34063:154:51569:42256:71042:747:42273:1900153:183:3…
42254	ribosome biogenesis	31 out of 352 genes, 8.8%	181 out of 10340 background genes, 1.8%	5.7e-11	0	AN0074:AN0421:AN0647:rpf2:AN10352:AN10712:AN11773:bop1:AN1533:AN1666:spb4:AN3313:rrs1:AN3827:AN4232:AN4298:AN4460:AN4648:AN4771:AN5177:AN5340:AN5865:AN5910:AN6067:AN6310:AN6556:AN6585:AN6612:AN6651:AN6902:AN7526	34473:32968:8298:6353:55:27:34462:31938:463:42274:71039:447:462:16570:42254:71038:45910:6547:480:30174:71040:31120:7163:71051:467:2001255:2001165:8361:45947:71036:1732:2001209:71037:54:71049:71035:6368:470:1902626:34475:42255:466:973:31054:16973:83:34476:280:33621:30702:90262:2001173:31126:6267:6364:122:71044:16070:154:51569:42256:71042:747:42273:183:31124:1015:956:472:35690:70911:6362
34470	ncRNA processing	30 out of 352 genes, 8.5%	197 out of 10340 background genes, 1.9%	3.46e-09	0	AN0074:AN0128:AN0141:AN0421:AN0647:AN0757:AN10352:AN10832:AN11773:bop1:AN1533:elp3:spb4:AN3313:rrs1:AN4232:AN4298:AN4460:AN4648:AN4771:AN5340:AN5865:AN5910:AN6310:AN6556:AN6585:AN6612:AN6902:AN7526:AN8066	34473:6413:32447:32968:8298:6353:55:27:34462:31938:463:42274:71039:447:462:16570:71038:45910:6547:480:30174:71040:7163:71051:467:2001255:2001165:8361:6400:71036:2001209:71037:54:71049:71035:6368:470:1902626:34475:42255:466:973:31054:83:34476:280:33621:30702:90262:2001173:2098:2127:31126:6267:30488:6364:122:6302:71044:154:51569:71042:747:42273:183:31124:1015:70301:31591:956:6357:472:35690:70911:63…
6364	rRNA processing	24 out of 352 genes, 6.8%	128 out of 10340 background genes, 1.2%	5.75e-09	0	AN0074:AN0421:AN0647:AN10352:AN11773:bop1:AN1533:spb4:AN3313:rrs1:AN4232:AN4298:AN4460:AN4648:AN4771:AN5340:AN5865:AN5910:AN6310:AN6556:AN6585:AN6612:AN6902:AN7526	34473:32968:8298:6353:55:27:34462:31938:463:42274:71039:447:462:16570:71038:45910:6547:480:30174:71040:7163:71051:467:2001255:2001165:8361:71036:2001209:71037:54:71049:71035:6368:470:1902626:34475:42255:466:973:31054:83:34476:280:33621:30702:90262:2001173:31126:6267:6364:122:71044:154:51569:71042:747:42273:183:31124:1015:956:472:35690:70911:6362
16072	rRNA metabolic process	25 out of 352 genes, 7.1%	140 out of 10340 background genes, 1.4%	6.41e-09	0	AN0074:AN0421:AN0647:AN10352:AN11773:bop1:AN1533:AN1929:spb4:AN3313:rrs1:AN4232:AN4298:AN4460:AN4648:AN4771:AN5340:AN5865:AN5910:AN6310:AN6556:AN6585:AN6612:AN6902:AN7526	34473:32968:8298:6353:55:27:34462:31938:6337:463:42274:71039:447:462:16570:71038:45910:6547:480:30174:9303:71040:7163:71051:467:2001255:2001165:8361:71036:2001209:71037:54:71049:71035:470:6368:1902626:34475:42255:466:973:31054:83:34476:280:33621:30702:90262:2001173:61587:31126:6267:6364:122:71044:154:51569:71042:747:42273:183:43044:31124:1015:70301:956:472:35690:70911:6362
34660	ncRNA metabolic process	32 out of 352 genes, 9.1%	260 out of 10340 background genes, 2.5%	2.05e-07	0	AN0074:AN0128:AN0141:AN0421:AN0647:AN0757:AN10352:AN10712:AN10832:AN11773:bop1:AN1533:AN1929:elp3:spb4:AN3313:rrs1:AN4232:AN4298:AN4460:AN4648:AN4771:AN5340:AN5865:AN5910:AN6310:AN6556:AN6585:AN6612:AN6902:AN7526:AN8066	34473:6413:32447:32968:8298:6353:55:27:34462:31938:6337:463:42274:71039:447:462:16570:42254:71038:45910:6547:480:30174:9303:71040:31120:7163:71051:467:2001255:2001165:8361:6400:71036:2001209:71037:54:71049:71035:470:6368:1902626:34475:42255:466:973:31054:83:34476:280:33621:30702:90262:2001173:2098:2127:61587:31126:6267:30488:6364:122:6302:71044:154:51569:71042:747:42273:183:43044:31124:1015:70301…
6396	RNA processing	32 out of 352 genes, 9.1%	287 out of 10340 background genes, 2.8%	2.54e-06	0	AN0074:AN0128:AN0141:AN0421:AN0647:AN0757:AN10194:AN10352:AN10832:AN11773:bop1:AN1533:elp3:spb4:AN3313:rrs1:nimX:AN4232:AN4298:AN4460:AN4648:AN4771:AN5340:AN5865:AN5910:AN6310:AN6556:AN6585:AN6612:AN6902:AN7526:AN8066	34473:1900182:30448:1902506:6413:32447:32968:45944:1902424:8298:6353:55:27:1990804:72429:34462:31938:463:42274:71039:447:1990820:462:16570:1990803:6468:71038:45910:6547:480:30174:10971:71040:7163:71051:467:2001255:1902845:51446:18105:1900087:18107:2001165:8361:45819:31138:45875:6400:70317:71036:2001209:393:71037:54:35308:71049:71035:1901319:6368:470:1902626:51447:34475:42255:1904537:31031:10568:8…
44085	cellular component biogenesis	46 out of 352 genes, 13.1%	568 out of 10340 background genes, 5.5%	2.78e-05	0	AN0074:AN0228:AN0421:AN0647:AN10164:AN10194:rpf2:AN10352:AN10712:AN11773:bop1:AN1533:AN1666:AN1956:gcpD:ugmA:spb4:AN3313:apsB:rrs1:AN3827:nimX:AN4232:AN4298:AN4460:kipB:AN4648:AN4771:AN5177:AN5340:AN5865:AN5910:AN6067:AN6070:AN6310:AN6556:AN6585:AN6612:AN6651:edc3:AN6902:chsA:AN7526:shoA:AN9380:AN9463	43936:34473:1900182:36178:916:6279:45944:6270:1902424:55:27:1990804:72429:48478:463:42274:48315:31023:9272:1402:31087:1990803:42254:6468:71038:30476:51056:30174:71040:2001255:34605:742:2001165:8361:45947:7232:45819:30010:71036:1732:2001209:6038:36244:71035:7019:1901319:6368:30473:1902626:727:43488:70795:82:973:31054:34476:280:706:184:10696:30702:90262:30466:10898:34599:9267:7130:2001033:7264:3221…
42273	ribosomal large subunit biogenesis	13 out of 352 genes, 3.7%	57 out of 10340 background genes, 0.6%	3.72e-05	0	AN0074:rpf2:bop1:spb4:rrs1:AN4232:AN4771:AN5177:AN5865:AN6310:AN6556:AN6612:AN6902	55:27:463:30174:8361:1902626:280:30702:6267:747:42273:956:8298:447:480:54:470:42255:466:6364:472:35690
90304	nucleic acid metabolic process	62 out of 352 genes, 17.6%	900 out of 10340 background genes, 8.7%	4.22e-05	0	AN0074:AN0128:AN0141:AN0228:AN0260:AN0421:AN0647:AN0757:AN10164:AN10194:AN10352:AN10497:AN10712:AN10755:AN10832:AN11098:AN11773:bop1:AN1479:AN1533:mshA:nosA:AN1929:elp3:AN3050:AN3067:spb4:AN3313:rrs1:AN3749:AN3846:nimX:AN4232:AN4298:AN4460:AN4648:AN4771:AN5114:AN5340:AN5865:smcB:AN5910:AN5992:AN6067:AN6070:AN6300:AN6310:AN6556:AN6585:AN6612:edc3:AN6895:AN6902:AN7007:bimD:AN7308:AN7325:AN7526:AN76…	34473:1900182:6279:45944:6270:1902424:55:27:1990804:72429:6281:48478:463:42274:48315:31087:70791:6284:1990803:42254:6468:71038:1905412:43111:30174:71040:2001255:2001165:8361:8295:45947:45819:70914:71036:35961:1900413:1732:2001209:1903459:9847:71035:1901319:6368:1902626:727:43488:82:10964:42276:973:31054:32933:7076:34476:280:6355:706:6351:6525:184:6366:10696:30702:90262:10898:71168:2127:2000817:45…
1903047	mitotic cell cycle process	24 out of 352 genes, 6.8%	206 out of 10340 background genes, 2.0%	0.00011	0	AN0228:AN10225:AN10755:AN2143:AN3067:AN3124:rgdA:apsB:nimE:nimX:kipB:teaA:AN4685:AN5676:smcB:AN5910:AN6070:AN7007:bimD:AN7325:AN7499:AN8236:bimB:AN9463	1900182:98783:6279:45944:6270:1902424:30011:70507:1990804:72429:6281:48478:48315:71921:31023:7052:71931:36289:6284:1990803:6468:51056:1905412:43111:51445:2001255:742:51666:2001165:45819:1903468:2001209:1903459:86:7019:1901319:6368:30473:727:82:10964:42276:7076:706:10696:90262:10898:71168:2000817:45004:9267:7130:2001033:282:7264:32210:6267:1990802:79:1934:1903477:60303:51569:10570:31573:1902425:71…
278	mitotic cell cycle	24 out of 352 genes, 6.8%	210 out of 10340 background genes, 2.0%	0.00016	0	AN0228:AN10225:AN10755:AN2143:AN3067:AN3124:rgdA:apsB:nimE:nimX:kipB:teaA:AN4685:AN5676:smcB:AN5910:AN6070:AN7007:bimD:AN7325:AN7499:AN8236:bimB:AN9463	1900182:98783:6279:45944:6270:1902424:30011:70507:1990804:72429:6281:48478:48315:71921:31023:7052:71931:36289:6284:1990803:6468:51056:1905412:43111:51445:2001255:742:51666:2001165:45819:1903468:2001209:1903459:86:7019:1901319:6368:30473:727:82:10964:42276:7076:706:10696:90262:10898:71168:2000817:45004:9267:7130:2001033:282:7264:32210:6267:1990802:79:1934:1903477:60303:51569:10570:31573:1902425:71…
6260	DNA replication	15 out of 352 genes, 4.3%	88 out of 10340 background genes, 0.9%	0.0002	0	AN0228:AN0260:AN10497:AN10755:AN3067:AN3749:AN4771:AN5114:AN5992:AN6070:AN6300:AN7007:AN7308:AN7325:AN8236	6279:6270:27:48478:6284:43111:30174:70914:1903459:727:10964:42276:30702:45004:6298:6267:31573:51097:6271:7534:33314:6269:7131:31297:6297:1990426:1902981:70868:6303:6260:1903460:1990516:1902969:35822:734:61500:1902450:6268:1902975:43570:45950:6364:16070:1904161:70829:7064
6261	DNA-dependent DNA replication	14 out of 352 genes, 4.0%	78 out of 10340 background genes, 0.8%	0.00027	0	AN0228:AN0260:AN10497:AN10755:AN3067:AN3749:AN4771:AN5114:AN5992:AN6070:AN6300:AN7007:AN7325:AN8236	6279:6270:27:48478:6284:43111:30174:70914:1903459:727:10964:42276:30702:45004:6298:6267:31573:51097:6271:7534:33314:6269:7131:31297:6297:1990426:1902981:70868:6303:1903460:1990516:1902969:35822:734:61500:1902450:6268:1902975:43570:45950:6364:16070:1904161:70829:7064
22618	ribonucleoprotein complex assembly	13 out of 352 genes, 3.7%	68 out of 10340 background genes, 0.7%	0.00034	0	AN0421:AN10164:AN10194:rpf2:spb4:rrs1:AN4232:AN4771:AN5865:AN6067:AN6310:edc3:AN6902	55:27:463:31087:30174:8361:45947:1732:1902626:43488:184:30702:9267:6267:42256:747:42273:36170:956:34462:33962:447:480:393:54:470:42255:6364:16070:34063:1900153:472:35690
71826	ribonucleoprotein complex subunit organization	13 out of 352 genes, 3.7%	71 out of 10340 background genes, 0.7%	0.00057	0	AN0421:AN10164:AN10194:rpf2:spb4:rrs1:AN4232:AN4771:AN5865:AN6067:AN6310:edc3:AN6902	55:27:463:31087:30174:8361:45947:1732:1902626:43488:184:30702:9267:6267:42256:747:42273:36170:956:34462:33962:447:480:393:54:470:42255:6364:16070:34063:1900153:472:35690
22402	cell cycle process	33 out of 352 genes, 9.4%	381 out of 10340 background genes, 3.7%	0.00064	0	tmpA:AN0228:AN10225:AN10755:nosA:ste20:AN2143:AN3067:AN3124:rgdA:apsB:nimE:AN3749:nimX:kipB:teaA:AN4685:AN4771:ppoC:AN5676:smcB:AN5910:AN6070:prs1:AN7007:chsA:bimD:AN7325:AN7499:AN8236:bimB:AN9380:AN9463	43936:1900182:98783:1410:916:43941:6279:45944:6270:1902424:30011:27:70507:1990804:72429:6281:48478:48315:71921:31023:7052:70791:71931:36289:6284:1990803:75306:6468:30476:51056:1905412:43111:51445:30174:2001255:742:51666:2001165:31030:45819:1900436:1903468:2001209:1903459:6038:86:7019:1901319:6368:165:43944:30473:727:1516:82:10964:42276:7076:6355:706:6351:10696:30702:90262:10898:71168:2000817:4500…
71840	cellular component organization or biogenesis	68 out of 352 genes, 19.3%	1111 out of 10340 background genes, 10.7%	0.00078	0	AN0074:AN0228:AN0421:AN0647:AN10164:AN10194:rpf2:AN10225:AN10352:AN10712:AN11773:AN12408:bop1:AN1533:AN1666:mshA:AN1929:AN1956:ste20:AN2143:gcpD:easA:AN3067:ugmA:AN3124:spb4:AN3313:apsB:nimE:rrs1:AN3749:AN3827:AN3846:nimX:AN4232:schA:AN4298:AN4460:kipB:AN4648:AN4771:AN5177:AN5340:AN5865:smcB:AN5910:AN6067:AN6070:AN6310:AN6556:AN6585:AN6612:AN6651:prs1:edc3:AN6895:AN6902:chsA:brr6:bimD:AN7499:AN75…	1902660:1410:6279:45944:55:70507:72429:6281:48478:463:48315:31023:9272:1402:42254:11:1905412:30174:71040:2001255:742:2001165:8361:8295:31030:7232:45819:1732:2001209:6038:7019:1901319:1902626:727:70795:42276:31054:34476:280:706:184:10696:30702:30466:10898:71168:45004:34599:19184:1558:32210:6267:90529:1990802:1903477:60303:154:10570:71042:747:7097:9651:71574:61780:34613:6508:1015:70301:35082:190516…
7049	cell cycle	33 out of 352 genes, 9.4%	394 out of 10340 background genes, 3.8%	0.00137	0	tmpA:AN0228:AN10225:AN10755:nosA:ste20:AN2143:AN3067:AN3124:rgdA:apsB:nimE:AN3749:nimX:kipB:teaA:AN4685:AN4771:ppoC:AN5676:smcB:AN5910:AN6070:prs1:AN7007:chsA:bimD:AN7325:AN7499:AN8236:bimB:AN9380:AN9463	1410:6279:45944:70507:72429:6281:48478:48315:31023:70791:36289:75306:1905412:30174:2001255:742:51666:2001165:31030:45819:2001209:1903459:6038:7019:1901319:727:42276:706:6351:10696:30702:10898:71168:45004:1558:32210:6267:90529:1990802:1934:1903477:60303:10570:71257:7097:71574:61780:34613:6508:1015:35082:1905168:10571:9405:45176:33314:10938:43935:1905121:1990443:1905411:6015:6353:6297:34184:51315:1…
16070	RNA metabolic process	47 out of 352 genes, 13.4%	683 out of 10340 background genes, 6.6%	0.00232	0	AN0074:AN0128:AN0141:AN0260:AN0421:AN0647:AN0757:AN10164:AN10194:AN10352:AN10712:AN10755:AN10832:AN11098:AN11773:bop1:AN1533:nosA:AN1929:elp3:AN3050:AN3067:spb4:AN3313:rrs1:nimX:AN4232:AN4298:AN4460:AN4648:AN4771:AN5114:AN5340:AN5865:AN5910:AN6067:AN6310:AN6556:AN6585:AN6612:edc3:AN6902:AN7325:AN7526:AN7661:AN8066:AN8125	6279:45944:55:72429:463:48315:70791:42254:30174:71040:2001255:2001165:8361:45819:1900413:1732:2001209:1903459:1901319:1902626:42276:31054:32933:34476:280:706:6351:184:6366:10696:30702:10898:2127:45004:6267:32210:6302:1990802:60303:154:10570:71042:747:1015:70301:1905168:6879:10571:9405:33314:6269:6353:6297:34462:6337:447:6547:6303:42752:480:9303:467:1902845:18105:1900087:31138:45875:6400:70317:199…
70925	organelle assembly	13 out of 352 genes, 3.7%	85 out of 10340 background genes, 0.8%	0.00474	0	AN0421:AN10164:rpf2:spb4:rrs1:nimX:AN4232:kipB:AN4771:AN6067:AN6310:edc3:AN6902	45944:55:72429:463:30174:8361:45819:1732:7019:1901319:1902626:706:184:10696:30702:10898:6267:32210:1990802:60303:10570:747:35082:1905168:10571:10938:34462:51315:447:480:1902845:18105:1900087:31138:45875:70317:35308:51447:1904537:31031:10568:1990801:1990139:16070:1902002:70816:1900153:472:1990758:6370:1900182:1902424:27:1990804:31087:1990803:6468:45947:43488:82:9267:7130:2001033:42256:1902425:1902…
42255	ribosome assembly	9 out of 352 genes, 2.6%	40 out of 10340 background genes, 0.4%	0.00531	0	AN0421:rpf2:spb4:rrs1:AN4232:AN4771:AN6067:AN6310:AN6902	55:463:30174:8361:1732:1902626:30702:6267:747:34462:447:480:16070:472:27:45947:42256:42273:956:470:42255:6364:35690
6139	nucleobase-containing compound metabolic process	66 out of 352 genes, 18.8%	1140 out of 10340 background genes, 11.0%	0.00792	0	AN0074:AN0128:AN0141:AN0228:AN0260:AN0421:AN0647:AN0757:AN10164:AN10194:AN10352:AN10497:AN10712:AN10755:AN10832:AN11098:AN11773:bop1:AN1479:AN1480:AN1533:mshA:nosA:acuF:AN1929:elp3:AN3050:AN3067:spb4:AN3313:rrs1:AN3749:AN3846:nimX:AN4232:AN4298:AN4460:AN4648:AN4771:pmaA:AN5114:AN5340:AN5865:smcB:AN5910:AN5992:AN6067:AN6070:AN6300:AN6310:AN6556:AN6585:AN6612:prs1:edc3:AN6895:AN6902:AN7007:bimD:AN7…	6279:45944:55:72429:6281:48478:463:48315:70791:42254:1905412:30174:71040:2001255:2001165:8361:8295:45819:1900413:1732:2001209:1903459:1901319:1902626:6091:727:42276:31054:32933:34476:280:706:6351:184:6366:10696:30702:10898:71168:2127:45004:32210:6267:6302:1990802:60303:154:10570:71042:747:51097:1015:70301:1905168:6879:10571:9405:33314:6269:43935:723:1905411:6015:6353:6297:34462:6337:1990426:447:6…
70	mitotic sister chromatid segregation	11 out of 352 genes, 3.1%	66 out of 10340 background genes, 0.6%	0.01088	0	AN10225:AN2143:AN3067:AN3124:apsB:nimE:nimX:kipB:smcB:bimD:AN7499	6279:45944:72429:6281:48315:31023:1905412:742:45819:7019:1901319:42276:706:10696:10898:71168:45004:32210:1990802:60303:10570:7097:61780:34613:35082:1905168:10571:33314:10938:43935:1905121:1905411:6297:34184:51315:33566:6303:1902845:18105:1900087:31138:45875:70317:35308:35822:51447:1904537:31031:10568:30989:1990801:51455:1990139:1902002:733:70816:75297:1990758:7064:6370:1900182:98783:1902424:19908…
6259	DNA metabolic process	24 out of 352 genes, 6.8%	270 out of 10340 background genes, 2.6%	0.01449	0	AN0141:AN0228:AN0260:AN10497:AN10755:AN1479:mshA:AN3067:AN3749:AN3846:nimX:AN4771:AN5114:smcB:AN5910:AN5992:AN6070:AN6300:AN6895:AN7007:bimD:AN7308:AN7325:AN8236	6279:45944:72429:6281:48478:1905412:30174:2001255:2001165:8295:45819:2001209:1903459:1901319:727:42276:280:706:10696:30702:10898:71168:45004:32210:6267:6302:1990802:60303:10570:51097:1015:1905168:10571:33314:6269:43935:723:1905411:6353:6297:1990426:6303:6260:1902845:18105:1900087:31138:45875:6400:70317:1990516:1902969:35308:35822:734:51447:61500:1904537:31031:10568:83:1990801:51455:31126:45950:19…
42274	ribosomal small subunit biogenesis	11 out of 352 genes, 3.1%	70 out of 10340 background genes, 0.7%	0.01941	0.0008	AN0421:AN0647:AN1533:AN3313:rrs1:AN4298:AN5340:AN6556:AN6585:AN6651:AN7526	55:154:34462:447:6547:480:472:42274:42273:8298:462:42255:16973:6364:35690
819	sister chromatid segregation	11 out of 352 genes, 3.1%	72 out of 10340 background genes, 0.7%	0.02551	0.0007	AN10225:AN2143:AN3067:AN3124:apsB:nimE:nimX:kipB:smcB:bimD:AN7499	6279:45944:72429:6281:48315:31023:1905412:742:45819:7019:1901319:42276:706:10696:10898:71168:45004:32210:1990802:60303:10570:7097:61780:34613:35082:1905168:10571:33314:10938:43935:1905121:1905411:6297:34184:51315:33566:6303:1902845:18105:1900087:31138:45875:70317:35308:35822:51447:1904537:31031:10568:30989:1990801:51455:1990139:1902002:733:70816:75297:1990758:7064:6370:1900182:98783:1902424:19908…
140014	mitotic nuclear division	11 out of 352 genes, 3.1%	74 out of 10340 background genes, 0.7%	0.0332	0.0007	AN10225:AN2143:AN3067:AN3124:apsB:nimE:nimX:kipB:smcB:bimD:AN7499	6279:45944:72429:6281:48315:31023:1905412:742:45819:7019:1901319:42276:706:10696:10898:71168:45004:32210:1990802:60303:10570:7097:61780:34613:35082:1905168:10571:33314:10938:43935:1905121:1905411:6297:34184:51315:33566:6303:1902845:18105:1900087:31138:45875:70317:35308:35822:51447:1904537:31031:10568:30989:1990801:51455:1990139:1902002:733:70816:75297:1990758:7064:6370:1900182:98783:1902424:19908…
280	nuclear division	14 out of 352 genes, 4.0%	116 out of 10340 background genes, 1.1%	0.03365	0.0007	AN0074:AN10225:AN2143:AN3067:AN3124:apsB:nimE:AN3749:AN3846:nimX:kipB:smcB:bimD:AN7499	6279:45944:72429:6281:48315:31023:1905412:742:8295:45819:7019:1901319:42276:280:706:10696:10898:71168:45004:32210:1990802:60303:10570:7097:61780:34613:35082:1905168:10571:33314:10938:43935:1905121:1905411:6297:34184:51315:33566:6303:1902845:18105:1900087:31138:45875:70317:35308:35822:51447:61500:1904537:31031:10568:30989:1990801:51455:1990139:1902002:733:70816:75297:1990758:7064:6370:1900182:9878…
7080	mitotic metaphase plate congression	6 out of 352 genes, 1.7%	20 out of 10340 background genes, 0.2%	0.03443	0.0007	AN3124:apsB:nimE:nimX:kipB:AN7499	45944:72429:48315:31023:742:45819:7019:1901319:706:10696:10898:32210:1990802:60303:10570:7097:35082:1905168:10571:10938:43935:1905121:34184:51315:33566:1902845:18105:1900087:31138:45875:70317:35308:51447:1904537:31031:10568:30989:1990801:1990139:1902002:70816:75297:1990758:6370:1900182:98783:1902424:1990804:71921:1990803:6468:86:30473:82:7130:2001033:79:1902425:1902850:30448:1902506:1990820:10971…
45875	negative regulation of sister chromatid cohesion	3 out of 352 genes, 0.9%	3 out of 10340 background genes, 0.0%	0.03494	0.0006	AN2143:nimX:bimD	45944:72429:6281:1905412:45819:1901319:706:10696:10898:71168:32210:1990802:60303:10570:61780:1905168:10571:43935:1905411:1902845:18105:1900087:31138:45875:70317:35308:51447:1904537:31031:10568:1990801:51455:1990139:1902002:70816:1990758:7064:6370:1900182:1902424:1990804:1990803:6468:82:2000817:7130:2001033:1902425:30448:1902506:1990820:10971:51446:18107:278:61781:7070:90169:1904667:45931:16192
7063	regulation of sister chromatid cohesion	4 out of 352 genes, 1.1%	7 out of 10340 background genes, 0.1%	0.03804	0.0012	AN2143:nimX:bimD:AN7499	45944:72429:6281:1905412:45819:1901319:706:10696:10898:71168:32210:1990802:60303:10570:61780:1905168:10571:43935:1905411:34184:51315:1902845:18105:1900087:31138:45875:70317:35308:51447:1904537:31031:10568:1990801:51455:1990139:1902002:70816:1990758:7064:6370:1900182:1902424:1990804:71921:1990803:6468:82:2000817:7130:2001033:1902425:30448:1902506:1990820:10971:51446:18107:1905406:278:61781:7070:90…
51310	metaphase plate congression	6 out of 352 genes, 1.7%	21 out of 10340 background genes, 0.2%	0.04683	0.0012	AN3124:apsB:nimE:nimX:kipB:AN7499	45944:72429:48315:31023:742:45819:7019:1901319:706:10696:10898:32210:1990802:60303:10570:7097:35082:1905168:10571:10938:43935:1905121:34184:51315:33566:1902845:18105:1900087:31138:45875:70317:35308:51447:1904537:31031:10568:30989:1990801:1990139:1902002:70816:75297:1990758:6370:1900182:98783:1902424:1990804:71921:1990803:6468:86:30473:82:7130:2001033:79:1902425:1902850:30448:1902506:1990820:10971…
462	maturation of SSU-rRNA from tricistronic rRNA transcript (SSU-rRNA, 5.8S rRNA, LSU-rRNA)	9 out of 352 genes, 2.6%	52 out of 10340 background genes, 0.5%	0.04988	0.0012	AN0421:AN1533:AN3313:rrs1:AN4298:AN5340:AN6556:AN6585:AN7526	55:154:34462:447:6547:480:472:42273:8298:462:42255:35690
46483	heterocycle metabolic process	72 out of 352 genes, 20.5%	1352 out of 10340 background genes, 13.1%	0.0499	0.0011	AN0074:AN0128:AN0141:AN0228:AN0260:AN0421:AN0647:AN0757:AN10164:AN10194:AN10352:AN10497:AN10712:AN10755:AN10832:AN11098:AN11773:bop1:AN1479:AN1480:AN1533:mshA:nosA:acuF:AN1929:elp3:easA:easB:easD:AN3050:AN3067:spb4:AN3313:rrs1:AN3749:AN3846:nimX:AN4232:AN4298:AN4460:AN4648:AN4771:pmaA:ppoC:AN5114:AN5340:AN5865:smcB:AN5910:AN5992:AN6067:AN6070:AN6300:AN6310:AN6556:AN6585:AN6612:prs1:edc3:AN6895:AN…	6279:45944:55:72429:6281:48478:463:48315:1900617:70791:42254:1905412:45461:30174:71040:2001255:2001165:8361:8295:45819:1900413:1732:2001209:1903459:1901319:1902626:6091:727:42276:31054:32933:34476:280:706:6351:184:6366:10696:30702:10898:71168:2127:45004:19184:32210:6267:6302:1990802:60303:154:10570:71042:747:51097:1015:70301:1905168:6879:10571:9405:33314:6269:43935:723:1905411:6015:6353:6297:3446…
2. FungiFun (https://elbe.hki-jena.de/fungifun/fungifun.php)
FunCat ID	FunCat description	FunCat main category	Gene ID(s)	Exact p-value	Adjusted p-value	# genes / category	# genes / input
11.04.01	rRNA processing	Transcription	ANIA_00074 | ANIA_00421 | ANIA_00647 | ANIA_00757 | ANIA_00944 | ANIA_01367 | ANIA_01533 | ANIA_01956 | ANIA_01983 | ANIA_03176 | ANIA_03313 | ANIA_03745 | ANIA_03794 | ANIA_03827 | ANIA_04298 | ANIA_04330 | ANIA_04460 | ANIA_04648 | ANIA_04748 | ANIA_04771 | ANIA_04865 | ANIA_05340 | ANIA_06200 | ANIA_06310 | ANIA_06585 | ANIA_06902 | ANIA_07350 | ANIA_07538 | ANIA_10194 | ANIA_10200 | ANIA_1035…	2.8411e-15	8.8357e-13	34 / 182	34 / 357
12.01	ribosome biogenesis	Protein synthesis	ANIA_00074 | ANIA_00647 | ANIA_00757 | ANIA_00844 | ANIA_01366 | ANIA_01367 | ANIA_01533 | ANIA_01666 | ANIA_02120 | ANIA_03313 | ANIA_03745 | ANIA_03827 | ANIA_04298 | ANIA_04330 | ANIA_04346 | ANIA_04648 | ANIA_04865 | ANIA_05865 | ANIA_06067 | ANIA_06200 | ANIA_06612 | ANIA_06902 | ANIA_07526 | ANIA_10055 | ANIA_10194 | ANIA_10200 | ANIA_10352	2.0375e-10	3.1683e-8	27 / 173	27 / 357
11.02.01	rRNA synthesis	Transcription	ANIA_00074 | ANIA_00421 | ANIA_00647 | ANIA_00944 | ANIA_01929 | ANIA_03176 | ANIA_03313 | ANIA_03745 | ANIA_03827 | ANIA_04346 | ANIA_04865 | ANIA_10352	1.1592e-05	0.0011616	12 / 71	12 / 357
10.01.03.03	ori recognition and priming complex formation	Cell cycle and DNA processing	ANIA_00228 | ANIA_00260 | ANIA_05676 | ANIA_05992 | ANIA_06070 | ANIA_10497 | ANIA_10755	1.494e-05	0.0011616	7 / 23	7 / 357
16.03.03	RNA binding	Protein with binding function or cofactor requirement (structural or analytic)	ANIA_00359 | ANIA_00421 | ANIA_00647 | ANIA_00944 | ANIA_01533 | ANIA_01983 | ANIA_03176 | ANIA_03427 | ANIA_03794 | ANIA_04232 | ANIA_04298 | ANIA_04330 | ANIA_04346 | ANIA_04460 | ANIA_04648 | ANIA_04865 | ANIA_05114 | ANIA_05340 | ANIA_06585 | ANIA_07350 | ANIA_10055 | ANIA_10164 | ANIA_10200 | ANIA_10352 | ANIA_10406 | ANIA_10712 | ANIA_11162	2.3303e-05	0.0014495	27 / 302	27 / 357
10.03.01.01	mitotic cell cycle	Cell cycle and DNA processing	ANIA_00228 | ANIA_02143 | ANIA_03648 | ANIA_05899 | ANIA_06070 | ANIA_07296 | ANIA_08783 | ANIA_10497	3.6503e-05	0.0018921	8 / 35	8 / 357
11.06.01	rRNA modification	Transcription	ANIA_00647 | ANIA_03313 | ANIA_04298 | ANIA_05340 | ANIA_10352 | ANIA_10712	4.9715e-05	0.0020251	6 / 19	6 / 357
16.19	nucleotide/nucleoside/nucleobase binding	Protein with binding function or cofactor requirement (structural or analytic)	ANIA_00359 | ANIA_00404 | ANIA_00421 | ANIA_00944 | ANIA_01366 | ANIA_01666 | ANIA_01956 | ANIA_02067 | ANIA_02646 | ANIA_03124 | ANIA_03176 | ANIA_03427 | ANIA_03721 | ANIA_04330 | ANIA_04346 | ANIA_04483 | ANIA_04513 | ANIA_04659 | ANIA_04685 | ANIA_05674 | ANIA_05865 | ANIA_06067 | ANIA_06300 | ANIA_06585 | ANIA_06875 | ANIA_07538 | ANIA_09077 | ANIA_09289 | ANIA_10164 | ANIA_10194	5.8006e-05	0.0020251	30 / 372	30 / 357
10.01.02	DNA topology	Cell cycle and DNA processing	ANIA_00228 | ANIA_01366 | ANIA_01956 | ANIA_05992 | ANIA_06070 | ANIA_06585 | ANIA_06895 | ANIA_07007 | ANIA_07538 | ANIA_09077 | ANIA_10194 | ANIA_10497	5.8605e-05	0.0020251	12 / 83	12 / 357
10.01.03	DNA synthesis and replication	Cell cycle and DNA processing	ANIA_00228 | ANIA_00260 | ANIA_03067 | ANIA_03154 | ANIA_04182 | ANIA_05114 | ANIA_05676 | ANIA_05992 | ANIA_06070 | ANIA_06300 | ANIA_07325 | ANIA_08236 | ANIA_09077 | ANIA_10497 | ANIA_10755	8.0115e-05	0.0024916	15 / 127	15 / 357
16.03.01	DNA binding	Protein with binding function or cofactor requirement (structural or analytic)	ANIA_00228 | ANIA_00260 | ANIA_00421 | ANIA_01708 | ANIA_01848 | ANIA_01929 | ANIA_01956 | ANIA_03067 | ANIA_03154 | ANIA_03721 | ANIA_03749 | ANIA_04094 | ANIA_04182 | ANIA_04865 | ANIA_05114 | ANIA_05583 | ANIA_05676 | ANIA_05770 | ANIA_05899 | ANIA_05992 | ANIA_06070 | ANIA_06300 | ANIA_06875 | ANIA_07325 | ANIA_07350 | ANIA_07538 | ANIA_07661 | ANIA_09077 | ANIA_10497 | ANIA_10755 | ANIA_10848	0.00024478	0.0069207	31 / 422	31 / 357
10.03.01	mitotic cell cycle and cell cycle control	Cell cycle and DNA processing	ANIA_00228 | ANIA_00359 | ANIA_00715 | ANIA_00844 | ANIA_01366 | ANIA_01666 | ANIA_03124 | ANIA_03154 | ANIA_03648 | ANIA_03721 | ANIA_04182 | ANIA_04238 | ANIA_04483 | ANIA_04513 | ANIA_04564 | ANIA_04685 | ANIA_05676 | ANIA_05899 | ANIA_05992 | ANIA_06070 | ANIA_06612 | ANIA_07526 | ANIA_08783 | ANIA_10497 | ANIA_11162	0.00038951	0.010095	25 / 319	25 / 357
10.03.01.01.09	G2/M transition of mitotic cell cycle	Cell cycle and DNA processing	ANIA_00715 | ANIA_02143 | ANIA_03648 | ANIA_04182 | ANIA_06300 | ANIA_07296 | ANIA_07499	0.0011841	0.028328	7 / 44	7 / 357
34.01.01.01	homeostasis of metal ions (Na, K, Ca etc.)	Interaction with the environment	ANIA_00773 | ANIA_01628 | ANIA_01833 | ANIA_01920 | ANIA_03681 | ANIA_04131 | ANIA_04906 | ANIA_05035 | ANIA_05610 | ANIA_06115 | ANIA_06642 | ANIA_08100 | ANIA_08499 | ANIA_08540 | ANIA_09289	0.0022188	0.049289	15 / 173	15 / 357

## Sheet: atfA mutant
Supplementary Table 3		Gene enrichment analysis of stress responsive genes.				Sheet 2 - DatfA mutant strain (up- and down-regulated gene groups)
Strain:	DatfA
Stress:	MSB
Group:	up-regulated genes
1. AspGD Gene Ontology Term Finder (http://www.aspergillusgenome.org/cgi-bin/GO/goTermFinder)
GOID	GO_term	Cluster frequency	Background frequency	Corrected P-value	False discovery rate	Gene(s) annotated to the term	Directly Annotated GOID List
8652	cellular amino acid biosynthetic process	35 out of 536 genes, 6.5%	132 out of 10340 background genes, 1.3%	2.63e-13	0	trxA:AN0385:AN0717:AN0840:AN0912:AN10298:AN1150:prnD:fahA:hmgA:hpdA:AN2526:leu2B:lysA:AN2882:idpA:AN3031:ileA:gmdA:AN4323:AN4401:AN4430:AN5019:AN5610:AN5731:luA:AN5957:AN6227:trpB:AN6338:AN6346:metG:AN7722:AN7876:AN8886	1900409:6528:6890:97308:1990355:162:9073:42144:6099:9072:6567:6572:19878:45454:6102:70791:9097:6888:19346:11:55114:1902987:6520:6559:6547:6537:19379:9113:9088:6553:6555:6562:80058:6529:52699:9082:6749:6526:42744:6564:10045:9108:44182:6662:2:6560:43605:71470:42438:1900429:34614:34198:71266:6525:6592:1903257:34599:6097:9099:9086:44030:9081:9083:105:9098:9405:9090
6520	cellular amino acid metabolic process	48 out of 536 genes, 9.0%	277 out of 10340 background genes, 2.7%	5.95e-11	0	trxA:AN0300:AN0385:AN0705:AN0717:AN0840:AN0912:AN10298:AN10863:AN1150:prnD:fahA:hmgA:AN1898:hpdA:AN2525:AN2526:leu2B:lysA:AN2882:agaA:idpA:AN3031:AN3073:ileA:gmdA:AN4323:AN4401:AN4430:mccA:AN5019:AN5610:AN5731:luA:AN5957:AN6227:trpB:AN6338:AN6346:mcdB:metG:AN7722:AN7876:AN8060:AN8354:AN8886:alcA:AN9157	6096:46416:1900409:6528:30448:6890:97308:1990355:162:10121:9073:42144:6099:9072:6567:6572:19878:45454:6116:6102:70791:9097:6888:19346:55114:11:1902987:6520:6559:6547:6563:6537:6094:9113:19379:9088:6553:46187:6995:6066:6555:6562:6552:80058:6529:52699:9082:6749:70178:6526:6564:42744:90368:10045:19629:9108:44182:2:6662:6071:43605:6560:71470:42438:1900429:34614:34198:71266:6525:6592:1903257:19541:345…
9082	branched-chain amino acid biosynthetic process	12 out of 536 genes, 2.2%	19 out of 10340 background genes, 0.2%	8.94e-09	0	AN0385:AN0840:AN0912:AN2526:leu2B:ileA:AN4323:AN4430:luA:AN5957:AN6346:AN7876	97308:6567:9097:55114:6520:9082:9108:2:6097:9099:9083:9081:9098:9405
16053	organic acid biosynthetic process	41 out of 536 genes, 7.6%	248 out of 10340 background genes, 2.4%	2e-08	0	trxA:AN0385:AN0717:AN0840:AN0912:AN10298:AN1150:AN12331:prnD:fahA:hmgA:hpdA:AN2389:AN2526:leu2B:lysA:AN2882:idpA:AN3031:ileA:gmdA:AN4323:AN4401:AN4430:mccA:AN5019:AN5610:AN5731:luA:AN5957:AN6227:trpB:ppoB:AN6338:AN6346:metG:AN7722:stcJ:AN7876:pkeA:AN8886	6096:1900590:1900409:6528:6890:97308:44550:1990355:162:9073:42144:6099:45460:9072:6567:6572:19878:45454:6102:70791:9097:6888:19346:55114:11:1902987:6520:6559:6547:6537:45461:6094:19748:9113:19379:9088:6979:6553:1900760:6555:6562:6552:80058:6529:52699:9082:6749:1900584:6526:6564:42744:10045:9108:44182:2:6662:43605:6560:71470:42173:42438:1900593:1900429:42316:34614:34198:71266:6525:6592:1903257:345…
46394	carboxylic acid biosynthetic process	41 out of 536 genes, 7.6%	248 out of 10340 background genes, 2.4%	2e-08	0	trxA:AN0385:AN0717:AN0840:AN0912:AN10298:AN1150:AN12331:prnD:fahA:hmgA:hpdA:AN2389:AN2526:leu2B:lysA:AN2882:idpA:AN3031:ileA:gmdA:AN4323:AN4401:AN4430:mccA:AN5019:AN5610:AN5731:luA:AN5957:AN6227:trpB:ppoB:AN6338:AN6346:metG:AN7722:stcJ:AN7876:pkeA:AN8886	6096:1900590:1900409:6528:6890:97308:44550:1990355:162:9073:42144:6099:45460:9072:6567:6572:19878:45454:6102:70791:9097:6888:19346:55114:11:1902987:6520:6559:6547:6537:45461:6094:19748:9113:19379:9088:6979:6553:1900760:6555:6562:6552:80058:6529:52699:9082:6749:1900584:6526:6564:42744:10045:9108:44182:2:6662:43605:6560:71470:42173:42438:1900593:1900429:42316:34614:34198:71266:6525:6592:1903257:345…
9081	branched-chain amino acid metabolic process	13 out of 536 genes, 2.4%	25 out of 10340 background genes, 0.2%	3.67e-08	0	AN0385:AN0840:AN0912:AN2526:leu2B:ileA:AN4323:AN4430:mccA:luA:AN5957:AN6346:AN7876	6096:97308:6567:9097:55114:6520:6094:6552:9082:9108:2:6097:9099:9083:9081:9098:9405:6633
1901605	alpha-amino acid metabolic process	33 out of 536 genes, 6.2%	181 out of 10340 background genes, 1.8%	1.33e-07	0	trxA:AN0300:AN0717:AN0840:AN0912:AN10298:AN10863:AN1150:prnD:fahA:hmgA:AN1898:hpdA:AN2525:leu2B:lysA:AN2882:agaA:idpA:AN3031:ileA:gmdA:AN4323:AN4401:mccA:AN5019:AN5610:luA:trpB:mcdB:metG:AN7722:alcA	6096:46416:1900409:6528:30448:6890:97308:1990355:162:10121:9073:42144:6099:6567:6572:19878:45454:6116:6102:70791:9097:6888:19346:55114:11:1902987:6520:6559:6547:6563:6537:6094:9113:19379:9088:6553:46187:6995:6066:6555:6562:6552:80058:6529:9082:6749:70178:6526:6564:42744:90368:10045:19629:44182:6662:6071:43605:6560:71470:42438:1900429:34614:34198:71266:6525:6592:19541:34599:6097:9099:44030:9086:33…
6082	organic acid metabolic process	66 out of 536 genes, 12.3%	561 out of 10340 background genes, 5.4%	1.43e-07	0	trxA:AN0300:AN0385:sidI:AN0705:AN0717:AN0840:AN0912:xanA:AN10298:AN10863:AN1150:AN12331:prnD:fahA:hmgA:AN1898:hpdA:AN2389:AN2525:AN2526:gpdC:leu2B:lysA:AN2882:agaA:pexF:idpA:AN3031:AN3073:AN3805:ileA:gmdA:AN4323:AN4401:AN4430:mccA:AN5019:AN5610:acuD:AN5731:luA:AN5957:swoM:AN6227:trpB:ppoB:AN6338:AN6346:mcdB:aoxA:metG:AN7722:stcJ:AN7876:pkeA:AN8060:AN8099:hapX:AN8354:mclA:AN8886:alcA:AN9157:AN9297…	6096:1900409:6890:97308:44550:9072:48315:6567:6572:45454:6116:6102:70791:9097:19346:11:6520:31171:6559:6563:45461:19748:9113:19379:6553:6995:1900760:6555:90375:15976:6529:52699:9082:6749:1900584:6564:42744:90368:19629:9108:44182:2:6662:6071:43605:6560:71470:42316:6696:16562:34198:71266:42758:6525:1903257:19541:34599:44030:1900197:33609:6425:6098:19547:19521:70301:6107:6879:6151:947:6625:9405:7014…
43436	oxoacid metabolic process	65 out of 536 genes, 12.1%	557 out of 10340 background genes, 5.4%	2.82e-07	0	trxA:AN0300:AN0385:sidI:AN0705:AN0717:AN0840:AN0912:AN10298:AN10863:AN1150:AN12331:prnD:fahA:hmgA:AN1898:hpdA:AN2389:AN2525:AN2526:gpdC:leu2B:lysA:AN2882:agaA:pexF:idpA:AN3031:AN3073:AN3805:ileA:gmdA:AN4323:AN4401:AN4430:mccA:AN5019:AN5610:acuD:AN5731:luA:AN5957:swoM:AN6227:trpB:ppoB:AN6338:AN6346:mcdB:aoxA:metG:AN7722:stcJ:AN7876:pkeA:AN8060:AN8099:hapX:AN8354:mclA:AN8886:alcA:AN9157:AN9297:catB	6096:1900409:6890:97308:44550:9072:48315:6567:6572:45454:6116:6102:70791:9097:19346:11:6520:31171:6559:6563:45461:19748:9113:19379:6553:6995:1900760:6555:90375:15976:6529:52699:9082:6749:1900584:6564:42744:90368:19629:9108:44182:2:6662:6071:43605:6560:71470:42316:6696:16562:34198:71266:42758:6525:1903257:19541:34599:44030:1900197:33609:6425:6098:19547:19521:70301:6107:6879:947:6625:9405:70145:653…
19752	carboxylic acid metabolic process	63 out of 536 genes, 11.8%	541 out of 10340 background genes, 5.2%	5.91e-07	0	trxA:AN0300:AN0385:AN0705:AN0717:AN0840:AN0912:AN10298:AN10863:AN1150:AN12331:prnD:fahA:hmgA:AN1898:hpdA:AN2389:AN2525:AN2526:gpdC:leu2B:lysA:AN2882:agaA:pexF:idpA:AN3031:AN3073:AN3805:ileA:gmdA:AN4323:AN4401:AN4430:mccA:AN5019:AN5610:acuD:AN5731:luA:AN5957:swoM:AN6227:trpB:ppoB:AN6338:AN6346:mcdB:aoxA:metG:AN7722:stcJ:AN7876:pkeA:AN8060:AN8099:AN8354:mclA:AN8886:alcA:AN9157:AN9297:catB	6096:1900409:6890:97308:44550:9072:48315:6567:6572:45454:6116:6102:70791:9097:19346:11:6520:6559:6563:45461:19748:9113:19379:6553:6995:1900760:6555:15976:6529:52699:9082:6749:1900584:6564:42744:90368:19629:9108:44182:2:6662:6071:43605:6560:71470:42316:16562:34198:71266:42758:6525:1903257:19541:34599:44030:1900197:33609:6425:6098:19547:19521:70301:6107:947:6625:9405:70145:6530:1900590:46416:6528:3…
44710	single-organism metabolic process	158 out of 536 genes, 29.5%	1965 out of 10340 background genes, 19.0%	8.82e-07	0	AN0034:AN0158:trxA:AN0300:AN0330:AN0385:AN0394:AN0484:AN0495:sidI:AN0705:AN0717:AN0840:lamA:AN0912:glrA:xanA:AN10098:ccp1:AN10298:AN10486:AN10495:AN10602:AN10783:AN10863:AN10921:AN11023:AN11094:AN11124:AN11198:AN11251:AN1150:AN12294:AN12331:AN1271:prnD:fahA:hmgA:AN1898:hpdA:AN2039:AN2197:hemA:AN2333:sarA:AN2389:AN2390:lacF:AN2525:AN2526:gpdC:AN2606:AN2704:leu2B:gpxA:lysA:AN2882:agaA:pexF:gsdA:idp…	1900381:6096:6974:1900409:6006:6890:97308:9712:44550:35837:19740:19594:9435:10914:9231:9072:55085:48315:6567:6572:2001310:71361:45454:6116:6102:70791:9097:43419:19346:11:6520:31171:30476:6559:6145:6563:9442:45461:19748:9113:19379:34605:6553:43455:6995:1900760:6807:6555:6740:10731:19563:1901426:90375:15976:6529:6741:52699:43942:9082:6749:1900584:46952:1900778:6564:42744:90368:19629:9108:44182:5977…
44283	small molecule biosynthetic process	49 out of 536 genes, 9.1%	372 out of 10340 background genes, 3.6%	8.92e-07	0	trxA:AN0385:sidI:AN0717:AN0840:AN0912:xanA:AN10298:AN1150:AN12331:prnD:fahA:hmgA:hpdA:AN2389:AN2526:gpdC:leu2B:lysA:AN2882:idpA:AN3031:AN3197:ileA:gmdA:AN4323:AN4401:AN4430:rsmA:mccA:AN5019:AN5497:AN5610:AN5731:luA:AN5957:swoM:AN6227:trpB:ppoB:AN6338:AN6346:metG:AN7722:stcJ:AN7876:pkeA:AN8886:alcA	1900381:6096:1900409:6890:97308:44550:10914:9231:9072:48315:6567:6572:2001310:45454:6116:6102:70791:9097:19346:11:6520:31171:6559:45461:19748:9113:19379:6553:43455:1900760:6555:6529:52699:9082:6749:1900584:6564:42744:9108:44182:2:6662:6071:43605:6560:71470:42316:6696:34198:71266:6525:1903257:34599:44030:1900197:33609:6098:70301:6151:947:9405:1900590:9060:6528:30448:1900376:1990355:162:9073:42144:…
1901607	alpha-amino acid biosynthetic process	21 out of 536 genes, 3.9%	89 out of 10340 background genes, 0.9%	2.44e-06	0	trxA:AN0717:AN0840:AN0912:AN10298:AN1150:prnD:leu2B:lysA:AN2882:idpA:AN3031:ileA:AN4323:AN4401:AN5019:AN5610:luA:trpB:metG:AN7722	1900409:6890:97308:6567:45454:6102:70791:9097:19346:11:6520:9113:19379:6553:6555:6529:9082:6749:6564:42744:44182:6662:6560:71470:34198:71266:6525:34599:44030:9405:6528:1990355:162:9073:42144:6099:19878:6888:55114:1902987:6547:6537:9088:6562:80058:6526:10045:1900429:34614:6592:6097:9099:9086:9083:9081:105:9098:9090
55114	oxidation-reduction process	81 out of 536 genes, 15.1%	827 out of 10340 background genes, 8.0%	8.11e-06	0	AN0158:trxA:AN0330:AN0394:AN0912:glrA:xanA:AN10098:ccp1:AN10602:AN10783:AN10863:AN11094:AN11198:AN11251:AN12294:prnD:hmgA:hpdA:AN2197:sarA:AN2389:AN2390:AN2526:gpdC:AN2606:AN2704:leu2B:gpxA:AN2882:gsdA:idpA:AN3030:AN3197:trxR:AN3612:AN3873:AN3963:AN4082:fmoB:AN4111:AN4120:AN4355:AN4755:phk:AN5228:AN5232:AN5354:AN5440:AN5497:AN5610:AN5986:AN6023:AN6167:ppoB:AN6394:CYP672A1:aoxA:AN6753:AN7162:fhbA:…	6096:1900409:6006:6890:97308:9712:44550:35837:9231:48315:6567:6572:2001310:45454:6116:6102:11:6520:6559:45461:19748:19379:6553:1900760:6740:10731:1901426:43942:9082:6749:1900778:42744:9108:44182:5977:2:6662:6071:19566:6560:71470:42316:15671:34198:42758:34599:1900197:33609:6098:8202:19521:42542:70301:6151:947:9405:6012:19662:46416:9060:43935:5975:6635:1990355:44114:9073:42144:6099:36245:45460:1987…
44281	small molecule metabolic process	87 out of 536 genes, 16.2%	932 out of 10340 background genes, 9.0%	2.09e-05	0	AN0034:trxA:AN0300:AN0385:AN0484:AN0495:sidI:AN0705:AN0717:AN0840:lamA:AN0912:xanA:AN10298:AN10495:AN10783:AN10863:AN11124:AN1150:AN12331:AN1271:prnD:fahA:hmgA:AN1898:hpdA:AN2389:AN2525:AN2526:gpdC:leu2B:lysA:AN2882:agaA:pexF:gsdA:idpA:AN3031:AN3073:AN3197:AN3805:ileA:gmdA:AN4323:AN4401:AN4430:rsmA:AN4603:mccA:AN5019:AN5497:AN5610:acuD:AN5669:AN5731:luA:AN5957:AN5986:swoM:AN6227:trpB:ppoB:AN6325:…	1900381:6096:1900409:6006:6890:97308:44550:19740:19594:9435:10914:9231:9072:48315:6567:6572:2001310:45454:6116:6102:70791:9097:43419:19346:11:6520:31171:6559:6145:6563:9442:45461:19748:9113:19379:6553:43455:6995:1900760:6807:6555:6740:19563:90375:15976:6529:6741:52699:9082:6749:1900584:46952:6564:42744:90368:19629:9108:44182:2:6662:6071:5997:19566:43605:6560:71470:42316:6696:16562:34198:71266:427…
9098	leucine biosynthetic process	5 out of 536 genes, 0.9%	5 out of 10340 background genes, 0.0%	0.00027	0	AN0840:AN0912:leu2B:AN4323:luA	97308:9097:9082:9405:55114:6097:9099:9083:9081:9098
6551	leucine metabolic process	6 out of 536 genes, 1.1%	8 out of 10340 background genes, 0.1%	0.00035	0	AN0840:AN0912:leu2B:AN4323:mccA:luA	6096:97308:9097:9082:9405:55114:6094:6552:6097:9099:9083:9081:9098:6633
9066	aspartate family amino acid metabolic process	12 out of 536 genes, 2.2%	50 out of 10340 background genes, 0.5%	0.00491	0.0011	trxA:AN0300:lysA:AN2882:AN3031:ileA:AN4401:AN5019:AN5610:mcdB:metG:alcA	1900409:6890:97308:6567:45454:6116:9097:19346:11:6520:19379:6553:6995:6555:6529:6749:42744:19629:44182:6662:6071:71470:71266:19541:34599:44030:33609:947:6530:6528:1990355:42144:19878:6888:55114:1902987:9088:46187:6066:80058:1900429:34614:9099:9086:6068:43458:9090
8152	metabolic process	261 out of 536 genes, 48.7%	4092 out of 10340 background genes, 39.6%	0.00506	0.0011	AN0034:AN0096:nirA:AN0122:AN0158:trxA:AN0226:AN0300:AN0330:AN0385:AN0394:AN0484:AN0495:AN0563:AN0581:AN0604:sidI:furA:AN0705:AN0717:AN0840:lamA:AN0912:glrA:xanA:AN10098:AN10192:ccp1:gst3:AN10298:AN10432:AN10486:AN10495:AN10602:AN10783:AN10863:AN10877:AN10880:AN10921:AN11023:AN11060:AN11094:AN11124:AN11149:AN11198:AN11251:AN1150:AN1193:AN12293:AN12294:AN12331:AN1271:AN1426:AN1566:AN1573:AN1614:AN1…	1900381:6974:1900409:6006:70485:6890:9712:44237:45944:19594:9435:9072:48315:55085:6567:71361:1402:6116:70791:9097:11:492:45461:9113:45848:42787:6553:43455:1900760:6807:6740:10731:19563:6814:6529:6725:43248:43942:70588:16226:9082:6749:46952:6564:90368:9108:44182:6290:6662:6091:6071:43605:1080:6511:71470:6505:15671:34198:6351:6366:42026:1900035:35617:19541:34599:1904262:32208:6425:6616:6098:15809:8…
6979	response to oxidative stress	20 out of 536 genes, 3.7%	134 out of 10340 background genes, 1.3%	0.013	0.004	AN0158:trxA:AN0297:AN0394:sidI:glrA:ccp1:AN10949:gpxA:gsdA:prpA:trxR:gstA:dlpA:AN5440:gstB:ppoB:AN7567:prxA:catB	6974:1900409:6006:6890:48315:11:45461:1900760:6740:10731:6749:44182:6662:71470:30466:71466:34599:1903026:6098:42542:45332:6471:70301:6879:9405:1990355:15903:6888:6855:6979:6915:98869:6750:18158:42173:34614:6139:43065:10378:51220:31408:30436:30036:97308:45454:31171:19379:34605:1900436:42744:42316:6696:46618:30003:31065:1900197:19521:71248:42144:36245:45460:1900551:16119:10106:97190:55114:304:80058…
1901700	response to oxygen-containing compound	16 out of 536 genes, 3.0%	102 out of 10340 background genes, 1.0%	0.04836	0.0086	trxA:AN0394:sidI:glrA:AN11094:gpxA:gsdA:trxR:hsp70:dlpA:luA:trpB:AN7590:alcA:catB:treA	1900409:6006:6890:19594:48315:6567:71361:6116:70791:11:45461:6740:10731:6749:44182:6662:6071:71470:42026:1900035:35617:34599:6616:6098:42542:70301:9405:90344:1990355:162:9073:6888:30150:98869:6750:18158:34614:6139:43065:10378:6068:43458:97308:45454:31171:19379:34605:1901426:60:43161:42744:5997:6696:5993:2181:33609:19521:209:947:42144:36245:1900551:16119:10106:55114:7163:46187:6066:304:80058:9051:…
2. FungiFun (https://elbe.hki-jena.de/fungifun/fungifun.php)
FunCat ID	FunCat description	FunCat main category	Gene ID(s)	Exact p-value	Adjusted p-value	# genes / category	# genes / input
01.01.11.04.01	biosynthesis of leucine	Metabolism	ANIA_00385 | ANIA_00840 | ANIA_00912 | ANIA_02526 | ANIA_02793 | ANIA_04323 | ANIA_04430 | ANIA_05886 | ANIA_05957 | ANIA_06346 | ANIA_06394 | ANIA_07876	1.227e-9	4.2087e-7	12 / 23	12 / 546
1.02	nitrogen, sulfur and selenium metabolism	Metabolism	ANIA_00300 | ANIA_00366 | ANIA_00399 | ANIA_00717 | ANIA_00828 | ANIA_01008 | ANIA_01150 | ANIA_02197 | ANIA_02944 | ANIA_03581 | ANIA_03957 | ANIA_04110 | ANIA_04111 | ANIA_04120 | ANIA_04401 | ANIA_04603 | ANIA_04655 | ANIA_05411 | ANIA_05616 | ANIA_06421 | ANIA_07051 | ANIA_07162 | ANIA_07169 | ANIA_07881 | ANIA_07921 | ANIA_07922 | ANIA_08206 | ANIA_08451 | ANIA_08653 | ANIA_11149	3.4936e-7	5.9915e-05	30 / 185	30 / 546
01.01.11.04.02	degradation of leucine	Metabolism	ANIA_00385 | ANIA_00887 | ANIA_04323 | ANIA_04690 | ANIA_05886 | ANIA_05957 | ANIA_06394 | ANIA_07876 | ANIA_09131 | ANIA_10783	2.4557e-06	0.00028077	10 / 28	10 / 546
01.01.11.02.01	biosynthesis of isoleucine	Metabolism	ANIA_00385 | ANIA_02526 | ANIA_03830 | ANIA_04323 | ANIA_04430 | ANIA_05957 | ANIA_06346 | ANIA_07876	1.4921e-05	0.0012795	8 / 21	8 / 546
01.01.11.03.01	biosynthesis of valine	Metabolism	ANIA_00385 | ANIA_02526 | ANIA_04323 | ANIA_04430 | ANIA_05957 | ANIA_06346 | ANIA_07876	4.4769e-05	0.0023233	7 / 18	7 / 546
01.20.37.01	metabolism of thioredoxin, glutaredoxin, glutathion	Metabolism	ANIA_00932 | ANIA_02981 | ANIA_03581 | ANIA_03963 | ANIA_04905 | ANIA_05652 | ANIA_05658	4.4769e-05	0.0023233	7 / 18	7 / 546
16.21.17	pyridoxal phosphate binding	Protein with binding function or cofactor requirement (structural or analytic)	ANIA_00385 | ANIA_00717 | ANIA_02284 | ANIA_02525 | ANIA_03830 | ANIA_04323 | ANIA_05616 | ANIA_06231 | ANIA_06338 | ANIA_07051 | ANIA_07876 | ANIA_08172	4.7413e-05	0.0023233	12 / 53	12 / 546
1.01	amino acid metabolism	Metabolism	ANIA_00385 | ANIA_00717 | ANIA_00840 | ANIA_01150 | ANIA_01731 | ANIA_02350 | ANIA_02526 | ANIA_02882 | ANIA_03031 | ANIA_03707 | ANIA_04323 | ANIA_04401 | ANIA_04430 | ANIA_05440 | ANIA_05610 | ANIA_05616 | ANIA_05652 | ANIA_05957 | ANIA_06231 | ANIA_06346 | ANIA_06869 | ANIA_07051 | ANIA_07722 | ANIA_07903 | ANIA_07952 | ANIA_10220 | ANIA_10298 | ANIA_10863	5.7851e-05	0.0024804	28 / 214	28 / 546
01.02.02.09.01	urea catabolism (not urea cycle)	Metabolism	ANIA_00887 | ANIA_04690 | ANIA_05411 | ANIA_06421	0.00016813	0.0064077	4 / 6	4 / 546
01.01.06.04.02	degradation of threonine	Metabolism	ANIA_02525 | ANIA_03805 | ANIA_03830 | ANIA_05634 | ANIA_08755	0.00024875	0.0085321	5 / 11	5 / 546
01.01.13	regulation of amino acid metabolism	Metabolism	ANIA_00098 | ANIA_00226 | ANIA_01731 | ANIA_02882 | ANIA_02944 | ANIA_05651 | ANIA_05658 | ANIA_06338 | ANIA_07921 | ANIA_08172	0.00059217	0.017623	10 / 50	10 / 546
32.01.01	oxidative stress response	Cell rescue, defense and virulence	ANIA_00170 | ANIA_00297 | ANIA_00932 | ANIA_02846 | ANIA_03581 | ANIA_03798 | ANIA_03963 | ANIA_05440 | ANIA_05781 | ANIA_05977 | ANIA_07567 | ANIA_08489 | ANIA_09339 | ANIA_10220	0.00061655	0.017623	14 / 88	14 / 546
01.01.09	metabolism of the cysteine - aromatic group	Metabolism	ANIA_01896 | ANIA_01899 | ANIA_05658 | ANIA_05672 | ANIA_05731 | ANIA_06338 | ANIA_08172 | ANIA_08886	0.00082713	0.021823	8 / 35	8 / 546
01.01.11.02.02	degradation of isoleucine	Metabolism	ANIA_00385 | ANIA_04323 | ANIA_05957 | ANIA_07876 | ANIA_10783	0.00092866	0.022752	5 / 14	5 / 546
1.05	C-compound and carbohydrate metabolism	Metabolism	ANIA_00034 | ANIA_00158 | ANIA_00887 | ANIA_00912 | ANIA_01193 | ANIA_01548 | ANIA_01677 | ANIA_01734 | ANIA_01786 | ANIA_02177 | ANIA_02351 | ANIA_02583 | ANIA_02704 | ANIA_02793 | ANIA_02892 | ANIA_02981 | ANIA_02999 | ANIA_03017 | ANIA_03030 | ANIA_03357 | ANIA_03400 | ANIA_03805 | ANIA_03873 | ANIA_03883 | ANIA_04082 | ANIA_04186 | ANIA_04430 | ANIA_04473 | ANIA_04576 | ANIA_04690 | ANIA_0491…	0.0010916	0.02496	76 / 916	76 / 546
01.01.11.03.02	degradation of valine	Metabolism	ANIA_00385 | ANIA_04323 | ANIA_05957 | ANIA_07876 | ANIA_10783	0.0013257	0.028419	5 / 15	5 / 546
01.02.07	regulation of nitrogen, sulfur and selenium metabolism	Metabolism	ANIA_02901 | ANIA_02944 | ANIA_03159 | ANIA_04109 | ANIA_04608 | ANIA_04905 | ANIA_05274 | ANIA_07921	0.0014695	0.029649	8 / 38	8 / 546
01.01.11.03	metabolism of valine	Metabolism	ANIA_04323 | ANIA_05957 | ANIA_10783	0.0019099	0.036395	3 / 5	3 / 546
01.01.09.04	metabolism of phenylalanine	Metabolism	ANIA_01899 | ANIA_03031 | ANIA_05731 | ANIA_06338 | ANIA_08172 | ANIA_08886	0.002292	0.041377	6 / 24	6 / 546
01.02.02.09	catabolism of nitrogenous compounds	Metabolism	ANIA_00330 | ANIA_02901 | ANIA_04603 | ANIA_06753 | ANIA_07324	0.0024746	0.04244	5 / 17	5 / 546
01.01.11	metabolism of the pyruvate family (alanine, isoleucine, leucine, valine) and D-alanine	Metabolism	ANIA_00840 | ANIA_03830 | ANIA_04323 | ANIA_05957 | ANIA_06394 | ANIA_09131	0.0028673	0.045396	6 / 25	6 / 546
01.01.03.05.02	degradation of arginine	Metabolism	ANIA_01896 | ANIA_02901 | ANIA_06869 | ANIA_07669	0.0029117	0.045396	4 / 11	4 / 546
01.01.03.03.02	degradation of proline	Metabolism	ANIA_01731 | ANIA_04355 | ANIA_05651 | ANIA_06869 | ANIA_07669	0.0032616	0.046084	5 / 18	5 / 546
32.05.01.03	chemical agent resistance	Cell rescue, defense and virulence	ANIA_00601 | ANIA_02625 | ANIA_03433 | ANIA_07149 | ANIA_07169 | ANIA_08489 | ANIA_10862 | ANIA_10949	0.0033589	0.046084	8 / 43	8 / 546
32.01.05	heat shock response	Cell rescue, defense and virulence	ANIA_00122 | ANIA_02333 | ANIA_04583 | ANIA_05129 | ANIA_05781 | ANIA_05977 | ANIA_06193 | ANIA_08269	0.0033589	0.046084	8 / 43	8 / 546
01.01.06.04.01	biosynthesis of threonine	Metabolism	ANIA_02525 | ANIA_02882 | ANIA_03031	0.0036517	0.048175	3 / 6	3 / 546
01.01.03	assimilation of ammonia, metabolism of the glutamate group	Metabolism	ANIA_00399 | ANIA_01008 | ANIA_01731 | ANIA_02197 | ANIA_04355 | ANIA_05652 | ANIA_08206	0.0039315	0.049945	7 / 35	7 / 546
Strain:	DatfA
Stress:	MSB
Group:	down-regulated genes
1. AspGD Gene Ontology Term Finder (http://www.aspergillusgenome.org/cgi-bin/GO/goTermFinder)
GOID	GO_term	Cluster frequency	Background frequency	Corrected P-value	False discovery rate	Gene(s) annotated to the term	Directly Annotated GOID List
42254	ribosome biogenesis	108 out of 549 genes, 19.7%	181 out of 10340 background genes, 1.8%	9.64e-90	0	AN0074:AN0092:AN0133:AN0237:AN0247:AN0262:AN0305:AN0421:AN0465:AN0475:AN0647:AN0695:AN0745:AN0796:AN0843:AN0946:AN10058:rpf2:AN10352:AN10618:AN10712:AN10943:AN10955:cgrA:AN11250:AN1166:AN1175:AN11773:AN11929:AN1200:AN1215:AN1228:hscA:AN1319:AN1345:bop1:AN1434:AN1533:AN1666:AN1711:AN1949:AN1964:AN2079:AN2292:AN2734:nsa2:AN3056:nop58:AN3172:spb4:AN3313:AN3413:AN3455:AN3706:rrs1:AN3827:rps16:AN4232:…	16075:398:51083:34473:51276:97308:6270:31167:8298:55:27:34462:44416:42274:463:48315:71039:447:462:42254:71216:71038:6547:42149:480:30174:71040:31120:7163:71051:467:70476:8361:45947:6999:30010:6450:34427:71036:70317:1732:56:31118:51211:6614:71037:54:71049:6461:71035:470:1902626:44182:469:36180:495:34475:6414:42255:70481:32259:466:31054:973:16973:28:280:34476:33621:30490:1904812:30702:8033:9267:645…
22613	ribonucleoprotein complex biogenesis	108 out of 549 genes, 19.7%	205 out of 10340 background genes, 2.0%	1.16e-81	0	AN0074:AN0092:AN0133:AN0237:AN0247:AN0262:AN0305:AN0421:AN0465:AN0475:AN0647:AN0695:AN0745:AN0796:AN0843:AN0946:AN10058:rpf2:AN10352:AN10618:AN10712:AN10943:AN10955:cgrA:AN11250:AN1166:AN1175:AN11773:AN11929:AN1200:AN1215:AN1228:hscA:AN1319:AN1345:bop1:AN1434:AN1533:AN1666:AN1711:AN1949:AN1964:AN2079:AN2292:AN2734:nsa2:AN3056:nop58:AN3172:spb4:AN3313:AN3413:AN3455:AN3706:rrs1:AN3827:rps16:AN4232:…	16075:398:51083:34473:51276:97308:6270:31167:8298:55:27:34462:44416:42274:463:48315:71039:447:462:42254:71216:71038:6547:42149:480:30174:71040:31120:7163:71051:467:70476:8361:45947:6999:30010:6450:34427:71036:70317:1732:56:31118:51211:6614:71037:54:71049:6461:71035:470:1902626:44182:469:36180:495:34475:6414:42255:70481:32259:973:31054:466:28:16973:34476:280:33621:30490:1904812:30702:8033:9267:645…
6364	rRNA processing	83 out of 549 genes, 15.1%	128 out of 10340 background genes, 1.2%	2.72e-72	0	AN0074:AN0092:AN0133:AN0237:AN0247:AN0305:AN0421:AN0465:AN0475:AN0647:AN0695:AN0745:AN0796:AN10352:AN10618:AN10943:AN10955:cgrA:AN11250:AN1175:AN11773:AN11929:AN1215:AN1228:hscA:AN1319:AN1345:bop1:AN1434:AN1533:AN1949:AN1964:AN2079:AN2292:nsa2:AN3056:nop58:AN3172:spb4:AN3313:AN3455:rrs1:AN4232:AN4298:AN4460:AN4471:AN4534:AN4594:ssz1:AN4648:AN4771:AN5222:AN5340:AN5785:AN5789:AN5865:AN5871:AN5875:A…	16075:398:51083:34473:97308:6270:31167:8298:55:27:34462:44416:42274:463:48315:71039:447:462:71216:71038:6547:42149:480:30174:71040:31120:7163:71051:467:70476:8361:30010:6450:34427:71036:70317:56:31118:51211:71037:54:71049:6461:71035:470:1902626:44182:469:36180:495:34475:42255:70481:32259:973:31054:466:28:16973:34476:280:33621:30490:1904812:30702:8033:9267:6452:282:6267:6364:1990417:2181:71044:199…
16072	rRNA metabolic process	85 out of 549 genes, 15.5%	140 out of 10340 background genes, 1.4%	1.64e-70	0	AN0074:AN0092:AN0133:AN0237:AN0247:AN0305:AN0421:AN0465:AN0475:AN0647:AN0695:AN0745:AN0796:AN10352:AN10618:AN10943:AN10955:AN10970:cgrA:AN11250:AN1175:AN11773:AN11929:AN1215:AN1228:hscA:AN1319:AN1345:bop1:AN1434:AN1533:AN1949:AN1964:AN2079:AN2292:nsa2:AN3056:nop58:AN3172:spb4:AN3313:AN3455:rrs1:AN3944:AN4232:AN4298:AN4460:AN4471:AN4534:AN4594:ssz1:AN4648:AN4771:AN5222:AN5340:AN5785:AN5789:AN5865:…	16075:398:51083:34473:6363:97308:6270:31167:8298:55:27:34462:44416:42274:463:48315:71039:447:462:71216:71038:6547:42149:480:30174:71040:31120:7163:71051:467:70476:8361:30010:6450:34427:71036:70317:56:31118:51211:71037:54:71049:6461:71035:470:1902626:44182:469:36180:495:34475:42255:70481:32259:973:31054:466:28:16973:34476:280:33621:30490:1904812:30702:8033:9267:6452:282:6267:6364:122:1990417:2181:…
34470	ncRNA processing	95 out of 549 genes, 17.3%	197 out of 10340 background genes, 1.9%	1.81e-66	0	AN0072:AN0074:AN0092:AN0133:AN0190:AN0237:AN0247:AN0305:AN0421:AN0465:AN0475:AN0647:AN0695:AN0745:AN0796:AN0956:AN10248:AN10352:AN10361:AN10551:AN10618:AN10943:AN10955:cgrA:AN11250:AN1175:AN11773:AN11929:AN1215:AN12203:AN1228:hscA:AN1319:AN1345:bop1:AN1434:AN1533:AN1949:AN1964:AN2079:AN2292:AN2451:AN2847:nsa2:AN3056:nop58:AN3172:spb4:AN3313:AN3455:rrs1:AN4232:AN4298:AN4460:AN4471:AN4534:AN4594:ss…	16075:398:51083:34473:6413:97308:6270:31167:8298:55:2939:27:34462:44416:42274:463:48315:71039:447:379:462:55114:71216:71038:6547:42149:480:70901:30174:71040:31120:7163:71051:467:17183:70476:8361:30010:6450:34427:6400:71036:70317:56:31118:51211:71037:54:71049:6461:71035:470:1902626:44182:469:36180:495:34475:42255:70481:32259:973:31054:466:28:16973:34476:280:33621:6139:30490:1904812:30702:8033:2098…
34660	ncRNA metabolic process	103 out of 549 genes, 18.8%	260 out of 10340 background genes, 2.5%	7.69e-62	0	AN0072:AN0074:AN0092:AN0133:AN0190:AN0237:AN0247:AN0305:AN0421:AN0465:AN0475:AN0647:AN0695:AN0745:AN0796:AN0956:AN10248:AN10352:AN10361:AN10551:AN10618:AN10712:AN10943:AN10955:AN10970:cgrA:AN11183:AN11250:AN1175:AN11773:AN11929:AN1215:AN12203:AN1228:hscA:AN1319:AN1345:bop1:AN1434:AN1533:AN1709:AN1949:AN1964:AN2079:AN2292:AN2415:AN2451:AN2747:AN2847:nsa2:AN3056:nop58:AN3172:spb4:AN3313:AN3455:rrs1…	16075:398:51083:34473:6363:70184:6413:97308:70893:6270:31167:8298:55:2939:27:34462:44416:42274:463:48315:71039:42797:447:379:462:42254:55114:71216:71038:6547:42149:480:70901:30174:71040:31120:7163:71051:467:17183:70476:8361:30010:6450:34427:6400:71036:70317:56:31118:51211:34337:71037:54:71049:6461:71035:6360:470:1902626:44182:469:36180:495:34475:42255:70481:32259:973:31054:466:28:16973:34476:280:…
6396	RNA processing	100 out of 549 genes, 18.2%	287 out of 10340 background genes, 2.8%	1.28e-53	0	AN0072:AN0074:AN0092:AN0133:AN0190:AN0237:AN0247:AN0305:AN0421:AN0465:AN0475:AN0647:AN0695:AN0745:AN0796:AN0956:AN10248:AN10352:AN10361:AN1045:AN10551:AN10618:AN10943:AN10955:cgrA:AN11250:AN1175:AN11773:AN11929:AN1215:AN12203:AN1228:hscA:AN1319:AN1345:bop1:AN1434:AN1533:AN1709:AN1949:AN1964:AN2079:rrp5:AN2292:AN2451:AN2847:nsa2:AN3056:nop58:AN3172:spb4:AN3313:AN3455:rrs1:AN4232:AN4298:AN4460:AN44…	16075:398:51083:34473:70184:6413:97308:6270:31167:8298:55:2939:27:34462:44416:42274:463:48315:71039:447:45292:379:462:55114:71216:71038:6547:42149:480:70901:30174:71040:31120:7163:71051:467:17183:70476:8361:30010:6450:34427:6400:71036:70317:56:31118:51211:34337:71037:54:71049:6461:71035:6396:470:1902626:44182:469:36180:495:43488:34475:42255:70481:32259:973:31054:466:28:16973:957:34476:280:33621:6…
10467	gene expression	153 out of 549 genes, 27.9%	823 out of 10340 background genes, 8.0%	3.28e-44	0	AN0072:AN0074:AN0092:AN0133:AN0142:AN0190:AN0237:AN0247:AN0262:AN0305:AN0312:AN0421:AN0465:AN0475:AN0647:AN0695:AN0745:AN0796:AN0843:AN0889:AN0907:AN0956:AN10182:AN10248:AN10352:AN10361:AN1045:rmtA:AN10551:AN10614:AN10618:AN10740:AN10943:AN10955:AN10970:cgrA:AN11183:AN11250:AN11411:AN1166:AN1175:AN11773:AN11929:AN1215:AN12203:AN1228:AN12419:hscA:AN1319:AN1345:bop1:AN1434:AN1533:AN1709:AN1949:AN19…	398:34473:6363:70184:97308:70893:6270:55:27:42274:463:48315:43558:42797:45292:71038:70901:30174:71040:43066:17183:8361:45947:30010:60567:6450:34427:71036:1732:34337:6461:71035:31638:6360:1902626:44182:495:43488:31929:71470:70481:32543:973:31054:957:34476:280:6307:30490:6351:6366:30702:2183:9267:51604:44030:30488:282:6267:1990417:71044:2181:18195:6412:1990481:154:494:42256:71042:6606:6390:747:7098…
44085	cellular component biogenesis	124 out of 549 genes, 22.6%	568 out of 10340 background genes, 5.5%	2.35e-42	0	AN0074:AN0092:AN0133:AN0228:AN0237:AN0247:AN0262:AN0305:tubA:AN0421:AN0465:AN0475:AN0647:AN0695:AN0745:AN0796:AN0843:AN0946:AN10058:rpf2:AN10352:FKBP5:AN10618:AN10712:AN10943:AN10955:cgrA:AN11250:AN1166:AN1175:AN11773:benA:AN11929:AN1200:AN1215:AN1228:hscA:AN1319:AN1345:bop1:aspD:AN1434:AN1533:AN1666:AN1711:AN1949:AN1964:bipA:AN2079:AN2292:AN2734:AN2907:nsa2:AN3056:nop58:AN3172:spb4:AN3313:AN3413…	398:34473:1410:6279:97308:6270:30011:921:55:27:1932:48478:42274:463:48315:55085:48311:40009:6486:42254:71038:30476:30174:71040:33523:742:6336:8361:45947:30010:226:6450:34427:71036:1732:6614:6461:71035:44406:7019:1902626:44182:30473:6334:6033:727:495:34508:70481:973:31054:31204:34476:280:30490:15784:30702:51228:30466:1903087:6986:8105:9267:412:282:16573:6267:48312:1990417:71044:2181:6412:1990481:1…
42274	ribosomal small subunit biogenesis	43 out of 549 genes, 7.8%	70 out of 10340 background genes, 0.7%	1.26e-34	0	AN0133:AN0247:AN0305:AN0421:AN0465:AN0475:AN0647:AN10618:AN11929:AN1319:AN1345:AN1434:AN1533:AN1949:AN1964:AN2079:AN2292:AN3056:nop58:AN3172:AN3313:rrs1:rps16:AN4298:AN4594:AN5222:AN5340:AN5702:AN5785:AN5789:AN5875:AN5960:AN6171:AN6265:AN6556:AN6561:AN6632:AN6651:AN6679:AN7305:AN7526:AN8870:AN9398	398:55:42274:463:6450:6461:30490:9267:282:2181:1990417:6412:154:42273:6407:36170:8298:34462:447:462:71216:6547:480:70476:70317:56:469:36180:42255:466:16973:28:1904812:6364:461:1900153:390:472:35690
16070	RNA metabolic process	122 out of 549 genes, 22.2%	683 out of 10340 background genes, 6.6%	3.85e-32	0	AN0072:AN0074:AN0092:AN0133:AN0190:AN0237:AN0247:AN0260:AN0305:AN0312:AN0421:AN0465:AN0475:AN0647:AN0695:AN0745:AN0796:AN0956:AN10248:AN10352:AN10361:AN1045:AN10551:AN10618:AN10712:AN10755:AN10943:AN10955:AN10970:cgrA:AN11183:AN11250:AN1175:AN11773:AN11929:AN1215:AN12203:AN1228:AN12419:hscA:AN1319:AN1345:bop1:AN1434:AN1533:AN1709:AN1949:AN1964:AN2079:rrp5:AN2283:AN2292:AN2415:AN2451:AN2747:AN2847…	398:34473:6363:70184:97308:70893:6279:6270:55:27:42274:463:48315:42797:45292:42254:71038:70901:30174:71040:17183:8361:45947:30010:6450:34427:71036:1732:1903459:34337:6461:71035:6360:1902626:44182:495:43488:70481:973:31054:957:34476:280:6307:30490:6351:6366:30702:9267:44030:30488:282:6267:1990417:2181:71044:6412:1990481:154:494:42256:71042:6390:747:70989:42273:6407:36170:956:372:16075:51083:6269:2…
42273	ribosomal large subunit biogenesis	37 out of 549 genes, 6.7%	57 out of 10340 background genes, 0.6%	8.04e-31	0	AN0074:AN0133:AN0237:AN0262:AN0946:AN10058:rpf2:AN10943:AN10955:AN1166:AN1200:AN1215:AN1228:bop1:AN1949:AN2734:nsa2:spb4:rrs1:AN4232:AN4469:AN4471:AN4560:AN4771:AN5702:AN5865:AN5871:AN6310:AN6374:AN6556:AN6612:AN6902:AN7424:AN7674:AN8247:AN8491:AN8834	55:27:42274:463:30174:8361:1902626:280:30702:9267:6267:1990417:2181:6412:747:42273:36170:956:51276:31167:8298:447:462:71216:480:54:470:36180:6414:42255:466:6364:464:42493:390:472:35690
30490	maturation of SSU-rRNA	37 out of 549 genes, 6.7%	60 out of 10340 background genes, 0.6%	1.33e-29	0	AN0133:AN0247:AN0305:AN0421:AN0465:AN0475:AN10618:AN1319:AN1345:AN1434:AN1533:AN1949:AN1964:AN2079:AN2292:AN3056:nop58:AN3172:AN3313:rrs1:AN4298:AN4594:AN5222:AN5340:AN5785:AN5789:AN5875:AN5960:AN6265:AN6556:AN6561:AN6632:AN6679:AN7305:AN7526:AN8870:AN9398	398:55:463:6450:6461:30490:9267:282:2181:1990417:6412:154:42273:6407:36170:8298:34462:447:462:71216:6547:480:70476:70317:56:469:36180:42255:466:16973:28:1904812:461:1900153:390:472:35690
90304	nucleic acid metabolic process	138 out of 549 genes, 25.1%	900 out of 10340 background genes, 8.7%	1.58e-29	0	AN0072:AN0074:AN0092:AN0133:AN0190:AN0228:AN0237:AN0247:AN0260:AN0305:AN0312:AN0421:AN0465:AN0475:AN0647:AN0695:AN0745:AN0796:AN0956:AN10087:AN10248:AN10352:AN10361:AN1045:AN10497:AN10551:AN10614:AN10618:AN10712:AN10755:AN10943:AN10955:AN10970:cgrA:AN11183:AN11250:AN1175:AN11773:AN11929:AN1215:AN12203:AN1228:AN12419:hscA:AN1319:AN1345:bop1:AN1434:AN1533:AN1709:AN1859:hepA:AN1949:AN1964:AN2079:rrp…	398:34473:6363:15074:70184:97308:70893:6279:6270:55:27:48478:6281:42274:463:48315:43558:7004:42797:45292:6284:42254:71038:43111:6306:70901:30174:71040:71459:43066:51567:17183:8361:45947:1990141:30010:70914:6450:34427:71036:1732:1903459:34337:6461:71035:6360:6334:1902626:44182:727:495:43488:31929:70481:42276:973:31054:957:34476:280:6307:30490:6355:6351:6366:30702:30466:9267:44030:30488:282:6267:19…
34641	cellular nitrogen compound metabolic process	187 out of 549 genes, 34.1%	1507 out of 10340 background genes, 14.6%	2.26e-29	0	AN0067:AN0072:AN0074:AN0092:AN0133:AN0142:AN0190:AN0228:AN0237:AN0247:AN0260:AN0262:AN0271:AN0305:AN0312:AN0421:AN0465:AN0475:AN0490:AN0647:AN0695:AN0745:AN0796:AN0843:AN0889:AN0907:AN0956:AN10087:AN10182:AN10248:AN10352:AN10361:AN1045:AN10497:AN10551:AN10614:AN10618:AN10712:AN10740:AN10755:AN10943:AN10955:AN10970:pabaB:cgrA:AN11183:AN11250:AN11411:AN1166:AN1175:AN11773:AN11929:AN1215:AN12203:AN1…	6096:398:34473:9116:6363:15074:70184:1901907:97308:70893:6279:6270:55:27:48478:6281:42274:463:48315:43558:2001310:7004:42797:1900617:45292:6284:1900805:42254:71038:43111:6306:70901:30174:71040:19748:71459:9113:43066:51567:17183:46081:8361:8295:45947:1990141:30010:70914:6450:34427:71036:1732:1903459:9847:34337:6461:71035:6360:6334:1902626:44182:46855:6007:6240:727:495:43488:31929:1900557:71470:704…
462	maturation of SSU-rRNA from tricistronic rRNA transcript (SSU-rRNA, 5.8S rRNA, LSU-rRNA)	34 out of 549 genes, 6.2%	52 out of 10340 background genes, 0.5%	2.51e-28	0	AN0133:AN0305:AN0421:AN0465:AN0475:AN10618:AN1319:AN1345:AN1434:AN1533:AN1949:AN1964:AN2079:AN2292:nop58:AN3172:AN3313:rrs1:AN4298:AN4594:AN5222:AN5340:AN5785:AN5789:AN5875:AN5960:AN6265:AN6556:AN6561:AN6679:AN7305:AN7526:AN8870:AN9398	398:55:463:6450:6461:9267:282:2181:1990417:6412:154:42273:6407:36170:8298:34462:447:462:71216:6547:480:70476:56:469:36180:42255:466:16973:28:461:390:472:35690
44260	cellular macromolecule metabolic process	188 out of 549 genes, 34.2%	1643 out of 10340 background genes, 15.9%	7.57e-25	0	AN0072:AN0074:AN0092:AN0133:AN0142:AN0190:AN0228:AN0237:AN0247:AN0260:AN0262:AN0305:AN0312:AN0421:AN0465:AN0475:AN0647:AN0695:AN0745:AN0796:AN0843:AN0889:AN0907:AN0956:AN10087:AN10182:AN10189:AN10248:AN10352:AN10361:AN10433:AN1045:FKBP5:AN10497:rmtA:AN10551:AN10614:AN10618:AN10712:AN10740:AN10755:AN10943:AN10955:AN10970:cgrA:AN11183:AN11250:AN11411:AN1166:AN1175:AN11773:AN11929:AN1215:AN12203:AN1…	70893:6279:55:1932:48478:6281:463:48315:55085:43558:7004:45292:36289:42254:70901:30174:71040:33523:71459:43066:742:51567:8361:70843:1732:1903459:1902626:44182:6334:727:495:31929:320:71470:70481:42276:31054:957:34476:280:6307:15784:6351:6366:30702:6489:30466:2183:412:6267:1990417:30100:1934:154:6616:71042:747:51097:6508:35246:33314:51083:6269:9060:288:723:1990443:2000678:2939:34462:6337:44416:3043…
6139	nucleobase-containing compound metabolic process	149 out of 549 genes, 27.1%	1140 out of 10340 background genes, 11.0%	2.03e-24	0	AN0067:AN0072:AN0074:AN0092:AN0133:AN0190:AN0228:AN0237:AN0247:AN0260:AN0271:AN0305:AN0312:AN0421:AN0465:AN0475:AN0490:AN0647:AN0695:AN0745:AN0796:AN0956:AN10087:AN10248:AN10352:AN10361:AN1045:AN10497:AN10551:AN10614:AN10618:AN10712:AN10755:AN10943:AN10955:AN10970:cgrA:AN11183:AN11250:AN1175:AN11773:AN11929:AN1215:AN12203:AN1228:AN12419:hscA:AN1319:AN1345:bop1:AN1434:AN1524:AN1533:AN1709:AN1806:A…	1901907:70893:6279:55:48478:6281:463:48315:43558:7004:45292:42254:70901:30174:71040:71459:9113:43066:51567:46081:8361:1732:1903459:6334:1902626:44182:6007:6240:727:495:31929:70481:42276:31054:957:34476:280:6307:6351:6366:30702:30466:1901911:6267:1990417:35863:32265:154:71042:747:6730:51097:9405:33314:51083:46100:6269:288:723:2000678:2939:34462:44416:35066:2000679:447:6348:379:43173:6547:6303:4214…
43170	macromolecule metabolic process	196 out of 549 genes, 35.7%	1828 out of 10340 background genes, 17.7%	1.74e-22	0	AN0072:AN0074:AN0092:AN0133:AN0142:AN0190:AN0228:AN0237:AN0247:AN0260:AN0262:AN0299:AN0305:AN0312:AN0421:AN0465:AN0475:AN0647:AN0695:AN0745:AN0796:AN0843:AN0889:AN0907:AN0956:AN10087:AN10182:AN10189:AN10248:AN10352:AN10361:AN10433:AN1045:FKBP5:AN10497:rmtA:AN10551:AN10614:AN10618:AN10712:AN10740:AN10755:AN10943:AN10955:AN10970:cgrA:AN11183:AN11250:AN11411:AN1166:AN1175:AN11773:AN11929:AN1215:AN12…	70893:6279:55:1932:48478:6281:463:48315:55085:43558:7004:45292:36289:42254:70901:30174:71040:33523:71459:43066:742:51567:8361:70843:1732:1903459:1902626:44182:6334:727:495:31929:320:71470:70481:42276:31054:957:34476:280:6307:15784:6351:6366:30702:6489:30466:2183:412:51604:6267:1990417:30100:1934:154:6616:71042:747:51097:6508:9405:35246:33314:51083:6269:9060:288:723:1990443:2000678:2939:34462:6337…
460	maturation of 5.8S rRNA	29 out of 549 genes, 5.3%	48 out of 10340 background genes, 0.5%	2.01e-22	0	AN0133:AN0237:AN0305:AN0421:AN0475:AN10618:AN11250:AN11773:AN1434:AN1533:nsa2:nop58:AN3172:rrs1:AN4298:AN4471:AN5340:AN5785:AN5789:AN5875:AN6244:AN6265:AN6556:AN6612:AN7305:AN7424:AN8247:AN8834:AN9398	55:463:71040:70481:31054:34476:71042:34462:447:480:467:70476:71049:34475:33621:464:472:34473:27:71038:34427:71036:6461:71035:973:9267:282:2181:71044:42273:6407:36170:16075:8298:71039:462:71216:71051:56:71037:36180:42255:466:28:16973:461:390:35690
466	maturation of 5.8S rRNA from tricistronic rRNA transcript (SSU-rRNA, 5.8S rRNA, LSU-rRNA)	29 out of 549 genes, 5.3%	48 out of 10340 background genes, 0.5%	2.01e-22	0	AN0133:AN0237:AN0305:AN0421:AN0475:AN10618:AN11250:AN11773:AN1434:AN1533:nsa2:nop58:AN3172:rrs1:AN4298:AN4471:AN5340:AN5785:AN5789:AN5875:AN6244:AN6265:AN6556:AN6612:AN7305:AN7424:AN8247:AN8834:AN9398	55:463:71040:70481:31054:34476:71042:34462:447:480:467:70476:71049:34475:33621:464:472:34473:27:71038:34427:71036:6461:71035:973:9267:282:2181:71044:42273:6407:36170:16075:8298:71039:462:71216:71051:56:71037:36180:42255:466:28:16973:461:390:35690
1901360	organic cyclic compound metabolic process	168 out of 549 genes, 30.6%	1491 out of 10340 background genes, 14.4%	1.12e-20	0	AN0067:AN0072:AN0074:AN0092:AN0133:AN0190:AN0228:ivoB:AN0237:AN0247:AN0260:AN0271:AN0305:AN0312:AN0421:AN0465:AN0475:AN0490:AN0647:AN0695:AN0745:AN0796:AN0851:AN0956:AN10087:AN10248:AN10352:AN10361:AN10396:AN1045:AN10497:AN10551:AN10614:AN10618:AN10648:AN10712:AN10755:AN10943:AN10955:AN10970:pabaB:cgrA:AN11183:AN11250:AN1175:AN11773:AN11929:AN1215:AN12203:AN1228:AN12419:hscA:AN1319:AN1345:bop1:AN…	1901907:70893:6279:55:48478:6281:463:48315:43558:7004:1900617:45292:42254:70901:30174:71040:71459:9113:43066:51567:46081:8361:1732:1903459:6334:1902626:44182:6007:6240:727:495:31929:70481:42276:31054:957:34476:280:6307:6351:6366:30702:30466:1901911:19184:6267:1990417:35863:32265:154:71042:747:6730:51097:9405:33314:51083:46100:6269:288:723:9073:2000678:2939:34462:44416:35066:2000679:447:6348:379:4…
71840	cellular component organization or biogenesis	138 out of 549 genes, 25.1%	1111 out of 10340 background genes, 10.7%	5e-20	0	AN0074:AN0092:AN0133:AN0228:AN0237:AN0247:AN0262:AN0305:tubA:AN0421:AN0465:AN0475:gelB:AN0647:AN0695:AN0745:AN0796:AN0843:AN0946:AN10058:rpf2:mnpA:AN10352:AN10361:FKBP5:AN10614:AN10618:AN10712:AN10943:AN10955:AN11136:cgrA:AN11250:AN1166:AN1175:AN11773:benA:AN11929:AN1200:AN1215:AN1228:hscA:AN1319:AN1345:bop1:aspD:AN1434:AN1533:AN1666:AN1711:AN1859:hepA:AN1949:AN1964:bipA:AN2079:AN2292:AN2477:easA…	1410:6279:921:55:1932:48478:6281:463:55085:48315:43558:7004:48311:42254:70901:30174:71040:33523:71459:43066:742:51567:8361:226:1732:7019:1902626:44182:6334:6033:727:495:31929:320:70481:31054:34476:280:6307:15784:30702:30466:19184:8105:412:6267:1990417:154:6616:71042:747:70783:45332:34613:9405:71963:51083:288:723:70196:2000678:32436:2939:34462:6337:30433:44416:35066:2000679:447:6348:415:70880:6547…
6725	cellular aromatic compound metabolic process	155 out of 549 genes, 28.2%	1344 out of 10340 background genes, 13.0%	1.12e-19	0	AN0067:AN0072:AN0074:AN0092:AN0133:AN0190:AN0228:ivoB:AN0237:AN0247:AN0260:AN0271:AN0305:AN0312:AN0421:AN0465:AN0475:AN0490:AN0647:AN0695:AN0745:AN0796:AN0956:AN10087:AN10248:AN10352:AN10361:AN1045:AN10497:AN10551:AN10614:AN10618:AN10712:AN10755:AN10943:AN10955:AN10970:pabaB:cgrA:AN11183:AN11250:AN1175:AN11773:AN11929:AN1215:AN12203:AN1228:AN12419:hscA:AN1319:AN1345:bop1:AN1434:AN1524:AN1533:AN17…	1901907:70893:6279:55:48478:6281:463:48315:43558:7004:45292:42254:70901:30174:71040:71459:9113:43066:51567:46081:8361:1732:1903459:6334:1902626:44182:6007:6240:727:495:31929:70481:42276:31054:957:34476:280:6307:6351:6366:30702:30466:1901911:19184:6267:1990417:35863:32265:154:71042:747:6730:51097:9405:33314:51083:46100:6269:288:723:9073:2000678:2939:34462:44416:35066:2000679:447:6348:379:43173:654…
46483	heterocycle metabolic process	155 out of 549 genes, 28.2%	1352 out of 10340 background genes, 13.1%	2.09e-19	0	AN0067:AN0072:AN0074:AN0092:AN0133:AN0190:AN0228:AN0237:AN0247:AN0260:AN0271:AN0305:AN0312:AN0421:AN0465:AN0475:AN0490:AN0647:AN0695:AN0745:AN0796:AN0956:AN10087:AN10248:AN10352:AN10361:AN1045:AN10497:AN10551:AN10614:AN10618:AN10712:AN10755:AN10943:AN10955:AN10970:pabaB:cgrA:AN11183:AN11250:AN1175:AN11773:AN11929:AN1215:AN12203:AN1228:AN12419:hscA:AN1319:AN1345:bop1:AN1434:AN1524:AN1533:AN1709:AN…	1901907:70893:6279:55:48478:6281:463:48315:43558:7004:1900617:45292:42254:70901:30174:71040:71459:9113:43066:51567:46081:8361:1732:1903459:6334:1902626:44182:6007:6240:727:495:31929:70481:42276:31054:957:34476:280:6307:6351:6366:30702:30466:1901911:19184:6267:1990417:35863:32265:154:71042:747:6730:51097:9405:33314:51083:46100:6269:288:723:2000678:2939:34462:44416:35066:2000679:447:6348:379:43173:…
469	cleavage involved in rRNA processing	25 out of 549 genes, 4.6%	45 out of 10340 background genes, 0.4%	7.97e-18	0	AN0305:AN0421:AN0475:AN10618:AN11250:AN11773:AN1434:AN1533:nop58:AN3172:rrs1:AN4298:AN5340:AN5785:AN5789:AN5875:AN6244:AN6265:AN6556:AN6561:AN6632:AN7305:AN7424:nop10:AN9398	55:71040:70481:31054:34476:71042:34462:447:480:467:70476:31118:71049:34475:33621:464:1900153:472:34473:71038:34427:71036:6461:71035:973:30490:9267:282:2181:71044:6412:42273:6407:36170:16075:8298:71039:462:71216:31120:71051:56:71037:469:36180:42255:28:16973:461:35690
6412	translation	49 out of 549 genes, 8.9%	199 out of 10340 background genes, 1.9%	2.59e-17	0	AN0142:AN0262:AN0465:AN0843:AN0889:AN0907:AN10182:AN10614:AN10740:AN11411:AN1166:AN1228:hscA:AN1345:AN1709:AN1964:AN2275:AN2734:AN2980:AN2997:AN3172:AN3411:AN3413:AN3595:AN3832:rps16:rpl16a:AN4222:AN4251:AN4594:AN4613:ssz1:AN4652:AN5014:AN5222:AN5719:AN5960:AN6067:AN6500:AN6629:AN6632:AN6679:AN6698:AN6843:AN7003:AN7554:AN8066:AN8256:AN8870	463:43558:43066:1732:44182:31929:71470:6307:2183:51083:288:723:2000678:44416:2000679:447:42149:71455:6414:6452:16070:45903:6415:18188:10620:1900153:70184:97308:27:42274:45947:6450:34337:32543:30490:9267:30488:2181:6412:42256:70989:6407:36170:16236:372:6413:462:71216:56:54:469:36180:28:6364:43433:461:45860:1901487:35690
6807	nitrogen compound metabolic process	216 out of 549 genes, 39.3%	2324 out of 10340 background genes, 22.5%	3.91e-17	0	AN0067:AN0072:AN0074:AN0092:AN0133:AN0142:AN0190:AN0228:AN0237:AN0247:AN0260:AN0262:AN0271:AN0299:AN0305:AN0312:AN0421:AN0465:AN0475:AN0490:AN0647:AN0695:AN0745:AN0796:AN0843:AN0889:AN0907:AN0956:AN10087:AN10182:AN10189:AN10248:AN10352:AN10361:AN10433:AN1045:FKBP5:AN10497:rmtA:AN10551:AN10614:AN10618:AN10701:AN10712:AN10740:AN10755:AN10943:AN10955:AN10970:pabaB:cgrA:AN11183:AN11250:AN11411:AN1166…	1901907:70893:6279:55:1932:48478:6281:463:48315:55085:43558:7004:1900617:45292:36289:42254:70901:30174:71040:33523:71459:9113:43066:742:51567:46081:8361:8295:70843:1732:10512:1903459:1902626:44182:6334:6007:6240:727:495:31929:320:71470:70481:42276:31054:957:34476:280:6307:15784:6351:6366:30702:6489:30466:2183:1901911:19184:412:51604:6267:1990417:30100:35863:32265:1934:154:6616:71042:747:6730:5109…
90501	RNA phosphodiester bond hydrolysis	26 out of 549 genes, 4.7%	52 out of 10340 background genes, 0.5%	4.69e-17	0	AN0305:AN0421:AN0475:AN10618:AN11250:AN11773:AN12203:AN1434:AN1533:nop58:AN3172:rrs1:AN4298:AN5340:AN5785:AN5789:AN5875:AN6244:AN6265:AN6556:AN6561:AN6632:AN7305:AN7424:nop10:AN9398	55:71040:70481:31054:34476:71042:34462:447:379:480:467:70476:31118:71049:34475:33621:464:1900153:6379:472:34473:71038:34427:71036:6461:71035:973:30490:9267:282:2181:71044:6412:42273:6407:36170:16075:8298:71039:462:71216:31120:71051:56:71037:469:36180:42255:28:16973:461:35690
42255	ribosome assembly	23 out of 549 genes, 4.2%	40 out of 10340 background genes, 0.4%	9.99e-17	0	AN0262:AN0421:AN10058:rpf2:AN10955:AN1166:AN11929:AN1200:AN2734:AN3172:spb4:rrs1:AN4232:AN4471:AN4771:AN5222:AN5960:AN6067:AN6310:AN6632:AN6902:AN7305:AN8834	55:463:30174:8361:1732:1902626:30702:6267:747:34462:447:480:6414:16070:1900153:472:27:45947:30490:9267:2181:6412:42256:42273:6407:36170:956:462:71216:56:470:469:36180:42255:466:28:6364:461:35690
43043	peptide biosynthetic process	52 out of 549 genes, 9.5%	234 out of 10340 background genes, 2.3%	2.37e-16	0	AN0142:AN0262:AN0465:AN0843:AN0889:AN0907:AN10182:AN10614:AN10740:AN11411:AN1166:AN1228:hscA:AN1345:AN1709:AN1964:AN2275:easA:easD:AN2734:AN2980:AN2997:AN3172:AN3411:AN3413:AN3595:AN3832:rps16:rpl16a:AN4222:AN4251:AN4594:AN4613:ssz1:AN4652:AN5014:AN5222:AN5719:AN5960:AN6067:AN6500:AN6629:AN6632:AN6679:AN6698:AN6843:AN7003:AN7554:AN8066:trxB:AN8256:AN8870	463:43558:1900617:43066:1732:44182:31929:71470:6307:2183:19184:9405:51083:288:723:2000678:44416:2000679:447:42149:71455:1900781:1900809:6414:6452:16070:45903:6415:18188:10620:1900153:70184:97308:27:42274:2001310:1900805:19748:45947:6450:9847:34337:1900557:1900772:32543:30490:9267:30488:2181:6412:42256:70989:6407:36170:16236:372:6413:462:55114:71216:31505:56:54:469:36180:28:36146:6364:43433:461:45…
43604	amide biosynthetic process	56 out of 549 genes, 10.2%	290 out of 10340 background genes, 2.8%	9.29e-15	0	AN0142:AN0262:AN0465:AN0843:AN0889:AN0907:AN10182:AN10614:AN10740:pabaB:AN11411:AN1166:AN1228:hscA:AN1345:AN1524:AN1709:AN1964:AN2275:easA:easD:ipnA:aatA:AN2734:AN2980:AN2997:AN3172:AN3411:AN3413:AN3595:AN3832:rps16:rpl16a:AN4222:AN4251:AN4594:AN4613:ssz1:AN4652:AN5014:AN5222:AN5719:AN5960:AN6067:AN6500:AN6629:AN6632:AN6679:AN6698:AN6843:AN7003:AN7554:AN8066:trxB:AN8256:AN8870	463:43558:1900617:9113:43066:1732:44182:31929:71470:6307:2183:19184:6730:9405:51083:288:723:2000678:44416:2000679:447:42149:71455:1900781:1900809:9396:6414:6452:16070:45903:6415:18188:10620:1900153:70184:97308:27:42274:2001310:1900805:19748:45947:6450:9847:34337:1900557:1900772:32543:30490:9267:30488:2181:6412:42256:70989:6407:36170:16236:372:6413:462:55114:71216:46656:31505:56:54:469:36180:28:36…
6518	peptide metabolic process	52 out of 549 genes, 9.5%	255 out of 10340 background genes, 2.5%	1.27e-14	0	AN0142:AN0262:AN0465:AN0843:AN0889:AN0907:AN10182:AN10614:AN10740:AN11411:AN1166:AN1228:hscA:AN1345:AN1709:AN1964:AN2275:easA:easD:AN2734:AN2980:AN2997:AN3172:AN3411:AN3413:AN3595:AN3832:rps16:rpl16a:AN4222:AN4251:AN4594:AN4613:ssz1:AN4652:AN5014:AN5222:AN5719:AN5960:AN6067:AN6500:AN6629:AN6632:AN6679:AN6698:AN6843:AN7003:AN7554:AN8066:trxB:AN8256:AN8870	463:43558:1900617:43066:1732:44182:31929:71470:6307:2183:19184:9405:51083:288:723:2000678:44416:2000679:447:42149:71455:1900781:1900809:6414:6452:16070:45903:6415:18188:10620:1900153:70184:97308:27:42274:2001310:1900805:19748:45947:6450:9847:34337:1900557:1900772:32543:30490:9267:30488:2181:6412:42256:70989:6407:36170:16236:372:6413:462:55114:71216:31505:56:54:469:36180:28:36146:6364:43433:461:45…
90305	nucleic acid phosphodiester bond hydrolysis	26 out of 549 genes, 4.7%	63 out of 10340 background genes, 0.6%	1.94e-14	0	AN0305:AN0421:AN0475:AN10618:AN11250:AN11773:AN12203:AN1434:AN1533:nop58:AN3172:rrs1:AN4298:AN5340:AN5785:AN5789:AN5875:AN6244:AN6265:AN6556:AN6561:AN6632:AN7305:AN7424:nop10:AN9398	55:71040:70481:31054:34476:71042:34462:447:379:480:467:70476:31118:71049:34475:33621:464:1900153:6379:472:34473:71038:34427:71036:6461:71035:973:30490:9267:282:2181:71044:6412:42273:6407:36170:16075:8298:71039:462:71216:31120:71051:56:71037:469:36180:42255:28:16973:461:35690
71826	ribonucleoprotein complex subunit organization	27 out of 549 genes, 4.9%	71 out of 10340 background genes, 0.7%	5.72e-14	0	AN0133:AN0262:AN0421:AN10058:rpf2:AN10955:AN1166:AN11929:AN1200:AN2734:AN3172:spb4:rrs1:AN4232:AN4471:AN4560:AN4771:AN5222:AN5865:AN5960:AN6067:AN6310:AN6632:AN6902:AN7305:AN8491:AN8834	55:463:30174:8361:1732:1902626:30702:6267:747:34462:447:480:6414:16070:1900153:472:27:45947:30490:9267:2181:6412:42256:42273:6407:36170:956:462:71216:56:54:470:469:36180:42255:466:28:6364:461:390:35690
447	endonucleolytic cleavage in ITS1 to separate SSU-rRNA from 5.8S rRNA and LSU-rRNA from tricistronic rRNA transcript (SSU-rRNA, 5.8S rRNA, LSU-rRNA)	18 out of 549 genes, 3.3%	28 out of 10340 background genes, 0.3%	5.93e-14	0	AN0305:AN0421:AN0475:AN10618:AN1434:AN1533:nop58:AN3172:rrs1:AN4298:AN5340:AN5785:AN5789:AN5875:AN6265:AN6556:AN7305:AN9398	55:34462:447:480:70476:472:6461:9267:282:2181:42273:6407:36170:8298:71216:56:36180:42255:16973:28:461:35690
22618	ribonucleoprotein complex assembly	26 out of 549 genes, 4.7%	68 out of 10340 background genes, 0.7%	1.85e-13	0	AN0262:AN0421:AN10058:rpf2:AN10955:AN1166:AN11929:AN1200:AN2734:AN3172:spb4:rrs1:AN4232:AN4471:AN4560:AN4771:AN5222:AN5865:AN5960:AN6067:AN6310:AN6632:AN6902:AN7305:AN8491:AN8834	55:463:30174:8361:1732:1902626:30702:6267:747:34462:447:480:6414:16070:1900153:472:27:45947:30490:9267:2181:6412:42256:42273:6407:36170:956:462:71216:56:54:470:469:36180:42255:466:28:6364:461:35690
479	endonucleolytic cleavage of tricistronic rRNA transcript (SSU-rRNA, 5.8S rRNA, LSU-rRNA)	19 out of 549 genes, 3.5%	34 out of 10340 background genes, 0.3%	3.36e-13	0	AN0305:AN0421:AN0475:AN10618:AN1434:AN1533:nop58:AN3172:rrs1:AN4298:AN5340:AN5785:AN5789:AN5875:AN6265:AN6556:AN7305:AN7424:AN9398	55:34462:447:480:70476:464:472:6461:9267:282:2181:42273:6407:36170:8298:71216:56:36180:42255:16973:28:461:35690
44238	primary metabolic process	231 out of 549 genes, 42.1%	2759 out of 10340 background genes, 26.7%	6.43e-13	0	AN0067:AN0072:AN0074:AN0092:AN0133:AN0142:AN0190:AN0228:AN0237:AN0247:AN0260:AN0262:AN0271:AN0299:AN0305:AN0312:AN0421:AN0465:AN0475:AN0490:gelB:AN0647:AN0695:AN0745:AN0796:AN0843:AN0851:AN0889:AN0907:AN0956:AN10087:AN10182:AN10189:AN10248:AN10352:AN10361:AN10396:AN10433:AN1045:FKBP5:AN10497:rmtA:AN10551:AN10614:AN10618:AN10648:AN10701:AN10712:AN10740:AN10755:AN10943:AN10955:AN10970:cgrA:AN11183:…	6490:1901907:70893:6279:55:1932:48478:6281:463:48315:55085:43558:7004:1900617:45292:36289:42254:70901:30174:71040:33523:71459:9113:43066:742:51567:46081:8361:8295:70843:1732:10512:1903459:16052:1902626:44182:6334:6007:6240:727:495:31929:320:71470:70481:42276:31054:957:34476:280:6307:15784:6351:6366:30702:6489:30466:2183:1901911:19184:412:51604:6267:1990417:30100:35863:32265:1934:154:6616:71042:74…
478	endonucleolytic cleavage involved in rRNA processing	19 out of 549 genes, 3.5%	35 out of 10340 background genes, 0.3%	6.99e-13	0	AN0305:AN0421:AN0475:AN10618:AN1434:AN1533:nop58:AN3172:rrs1:AN4298:AN5340:AN5785:AN5789:AN5875:AN6265:AN6556:AN7305:AN7424:AN9398	55:34462:447:480:70476:464:472:6461:9267:282:2181:42273:6407:36170:8298:71216:56:36180:42255:16973:28:461:35690
470	maturation of LSU-rRNA	16 out of 549 genes, 2.9%	24 out of 10340 background genes, 0.2%	1.38e-12	0	AN0133:AN0237:AN10943:AN1215:AN1228:AN1949:nsa2:spb4:AN4232:AN4471:AN6374:AN6612:AN7424:AN8247:AN8491:AN8834	55:463:8361:1902626:1990417:747:464:27:6412:462:470:466:42493:390
90502	RNA phosphodiester bond hydrolysis, endonucleolytic	19 out of 549 genes, 3.5%	36 out of 10340 background genes, 0.3%	1.4e-12	0	AN0305:AN0421:AN0475:AN10618:AN1434:AN1533:nop58:AN3172:rrs1:AN4298:AN5340:AN5785:AN5789:AN5875:AN6265:AN6556:AN7305:AN7424:AN9398	55:34462:447:480:70476:464:472:6461:9267:282:2181:42273:6407:36170:8298:71216:56:36180:42255:16973:28:461:35690
463	maturation of LSU-rRNA from tricistronic rRNA transcript (SSU-rRNA, 5.8S rRNA, LSU-rRNA)	15 out of 549 genes, 2.7%	21 out of 10340 background genes, 0.2%	2.18e-12	0	AN0133:AN0237:AN10943:AN1215:AN1228:AN1949:nsa2:AN4232:AN4471:AN6374:AN6612:AN7424:AN8247:AN8491:AN8834	55:463:8361:1902626:1990417:747:464:27:6412:462:466:42493:390
6403	RNA localization	24 out of 549 genes, 4.4%	63 out of 10340 background genes, 0.6%	2.98e-12	0	AN0843:rmtA:AN10618:AN10943:AN11250:AN11773:AN1215:hscA:AN1666:AN1711:AN3172:AN3413:AN3455:AN3706:rrs1:rps16:AN5789:AN5865:AN6556:AN6632:AN6651:nic96:AN8834:AN9398	55:463:71040:1902626:44182:70481:31054:34476:71042:35246:51083:44416:447:42149:480:467:70476:6999:71049:34475:33621:6452:45903:6409:1900153:472:34473:27:42274:71038:60567:6450:34427:71036:71035:973:30490:9267:282:2181:71044:18195:6412:6606:42273:6407:36170:32968:8298:71039:71216:71051:56:71037:54:36180:469:6406:42255:466:28:16973:6364:461:42493:35690
6611	protein export from nucleus	23 out of 549 genes, 4.2%	58 out of 10340 background genes, 0.6%	4.02e-12	0	AN0843:rmtA:AN10618:AN10943:AN11250:AN1215:hscA:AN1666:AN1711:AN3172:AN3413:AN3455:AN3706:rrs1:rps16:AN5789:AN5865:cse1:AN6632:AN6651:nic96:AN8834:AN9398	55:463:1902626:44182:70481:6611:35246:51083:44416:447:42149:480:467:70476:6999:6452:45903:6409:1900153:472:27:42274:71038:60567:6450:34427:71035:30490:9267:282:2181:18195:6412:6606:42273:6407:36170:32968:71216:56:54:36180:469:6406:42255:466:28:16973:6364:461:42493:35690
71428	rRNA-containing ribonucleoprotein complex export from nucleus	17 out of 549 genes, 3.1%	29 out of 10340 background genes, 0.3%	4.12e-12	0	AN0843:AN10618:AN10943:AN1215:hscA:AN1666:AN1711:AN3172:AN3413:AN3706:rrs1:rps16:AN5789:AN5865:AN6632:nic96:AN8834	55:463:1902626:44182:51083:44416:447:42149:480:70476:6999:6452:45903:1900153:472:27:42274:6450:30490:282:2181:6412:6606:42273:6407:56:54:469:42255:466:16973:28:6364:461:42493:35690
51168	nuclear export	23 out of 549 genes, 4.2%	59 out of 10340 background genes, 0.6%	6.26e-12	0	AN0843:rmtA:AN10618:AN10943:AN11250:AN1215:hscA:AN1666:AN1711:AN3172:AN3413:AN3455:AN3706:rrs1:rps16:AN5789:AN5865:cse1:AN6632:AN6651:nic96:AN8834:AN9398	55:463:1902626:44182:70481:6611:35246:51083:44416:447:42149:480:467:70476:6999:6452:45903:6409:1900153:472:27:42274:71038:60567:6450:34427:71035:30490:9267:282:2181:18195:6412:6606:42273:6407:36170:32968:71216:56:54:36180:469:6406:42255:466:28:16973:6364:461:42493:35690
70925	organelle assembly	27 out of 549 genes, 4.9%	85 out of 10340 background genes, 0.8%	1.06e-11	0	AN0262:AN0421:AN10058:rpf2:AN10955:AN1166:benA:AN11929:AN1200:aspD:AN2734:AN3172:spb4:rrs1:AN4232:AN4471:AN4771:AN5222:AN5960:AN6067:AN6310:AN6632:AN6902:AN7305:aspC:AN8187:AN8834	1410:55:921:463:30174:8361:1732:7019:1902626:6033:30702:8105:6267:747:70783:34613:9405:71963:34462:447:480:70317:6414:40023:16070:281:1900153:472:30011:27:45947:44406:30473:30490:51228:1903087:9267:48312:2181:6412:42256:70787:42273:6407:36170:956:920:30448:462:71216:61641:51258:7017:31505:56:470:70:469:36180:42255:31122:466:28:6364:461:45860:51382:35690
43603	cellular amide metabolic process	56 out of 549 genes, 10.2%	339 out of 10340 background genes, 3.3%	1.24e-11	0	AN0142:AN0262:AN0465:AN0843:AN0889:AN0907:AN10182:AN10614:AN10740:pabaB:AN11411:AN1166:AN1228:hscA:AN1345:AN1524:AN1709:AN1964:AN2275:easA:easD:ipnA:aatA:AN2734:AN2980:AN2997:AN3172:AN3411:AN3413:AN3595:AN3832:rps16:rpl16a:AN4222:AN4251:AN4594:AN4613:ssz1:AN4652:AN5014:AN5222:AN5719:AN5960:AN6067:AN6500:AN6629:AN6632:AN6679:AN6698:AN6843:AN7003:AN7554:AN8066:trxB:AN8256:AN8870	463:43558:1900617:9113:43066:1732:44182:31929:71470:6307:2183:19184:6730:9405:51083:288:723:2000678:44416:2000679:447:42149:71455:1900781:1900809:9396:6414:6452:16070:45903:6415:18188:10620:1900153:70184:97308:27:42274:2001310:1900805:19748:45947:6450:9847:34337:1900557:1900772:32543:30490:9267:30488:2181:6412:42256:70989:6407:36170:16236:372:6413:462:55114:71216:46656:31505:56:54:469:36180:28:36…
71166	ribonucleoprotein complex localization	22 out of 549 genes, 4.0%	56 out of 10340 background genes, 0.5%	2.01e-11	0	AN0843:rmtA:AN10618:AN10943:AN11250:AN1215:hscA:AN1666:AN1711:AN3172:AN3413:AN3455:AN3706:rrs1:rps16:AN5789:AN5865:AN6632:AN6651:nic96:AN8834:AN9398	55:463:1902626:44182:70481:35246:51083:44416:447:42149:480:467:70476:6999:6452:45903:6409:1900153:472:27:42274:71038:60567:6450:34427:71035:30490:9267:282:2181:18195:6412:6606:42273:6407:36170:32968:71216:56:54:36180:469:6406:42255:466:28:16973:6364:461:42493:35690
71426	ribonucleoprotein complex export from nucleus	22 out of 549 genes, 4.0%	56 out of 10340 background genes, 0.5%	2.01e-11	0	AN0843:rmtA:AN10618:AN10943:AN11250:AN1215:hscA:AN1666:AN1711:AN3172:AN3413:AN3455:AN3706:rrs1:rps16:AN5789:AN5865:AN6632:AN6651:nic96:AN8834:AN9398	55:463:1902626:44182:70481:35246:51083:44416:447:42149:480:467:70476:6999:6452:45903:6409:1900153:472:27:42274:71038:60567:6450:34427:71035:30490:9267:282:2181:18195:6412:6606:42273:6407:36170:32968:71216:56:54:36180:469:6406:42255:466:28:16973:6364:461:42493:35690
6405	RNA export from nucleus	22 out of 549 genes, 4.0%	57 out of 10340 background genes, 0.6%	3.12e-11	0	AN0843:rmtA:AN10618:AN10943:AN11250:AN1215:hscA:AN1666:AN1711:AN3172:AN3413:AN3455:AN3706:rrs1:rps16:AN5789:AN5865:AN6632:AN6651:nic96:AN8834:AN9398	55:463:1902626:44182:70481:35246:51083:44416:447:42149:480:467:70476:6999:6452:45903:6409:1900153:472:27:42274:71038:60567:6450:34427:71035:30490:9267:282:2181:18195:6412:6606:42273:6407:36170:32968:71216:56:54:36180:469:6406:42255:466:28:16973:6364:461:42493:35690
50658	RNA transport	22 out of 549 genes, 4.0%	59 out of 10340 background genes, 0.6%	7.26e-11	0	AN0843:rmtA:AN10618:AN10943:AN11250:AN1215:hscA:AN1666:AN1711:AN3172:AN3413:AN3455:AN3706:rrs1:rps16:AN5789:AN5865:AN6632:AN6651:nic96:AN8834:AN9398	55:463:1902626:44182:70481:35246:51083:44416:447:42149:480:467:70476:6999:6452:45903:6409:1900153:472:27:42274:71038:60567:6450:34427:71035:30490:9267:282:2181:18195:6412:6606:42273:6407:36170:32968:71216:56:54:36180:469:6406:42255:466:28:16973:6364:461:42493:35690
51236	establishment of RNA localization	22 out of 549 genes, 4.0%	59 out of 10340 background genes, 0.6%	7.26e-11	0	AN0843:rmtA:AN10618:AN10943:AN11250:AN1215:hscA:AN1666:AN1711:AN3172:AN3413:AN3455:AN3706:rrs1:rps16:AN5789:AN5865:AN6632:AN6651:nic96:AN8834:AN9398	55:463:1902626:44182:70481:35246:51083:44416:447:42149:480:467:70476:6999:6452:45903:6409:1900153:472:27:42274:71038:60567:6450:34427:71035:30490:9267:282:2181:18195:6412:6606:42273:6407:36170:32968:71216:56:54:36180:469:6406:42255:466:28:16973:6364:461:42493:35690
50657	nucleic acid transport	22 out of 549 genes, 4.0%	60 out of 10340 background genes, 0.6%	1.09e-10	0	AN0843:rmtA:AN10618:AN10943:AN11250:AN1215:hscA:AN1666:AN1711:AN3172:AN3413:AN3455:AN3706:rrs1:rps16:AN5789:AN5865:AN6632:AN6651:nic96:AN8834:AN9398	55:463:1902626:44182:70481:35246:51083:44416:447:42149:480:467:70476:6999:6452:45903:6409:1900153:472:27:42274:71038:60567:6450:34427:71035:30490:9267:282:2181:18195:6412:6606:42273:6407:36170:32968:71216:56:54:36180:469:6406:42255:466:28:16973:6364:461:42493:35690
34471	ncRNA 5'-end processing	12 out of 549 genes, 2.2%	15 out of 10340 background genes, 0.1%	1.52e-10	0	AN0305:AN0421:AN0475:AN10618:AN1434:AN1533:nop58:AN4298:AN5785:AN6265:AN6556:AN7305	34462:447:480:472:6461:9267:42273:36170:8298:71216:56:36180:35690
472	endonucleolytic cleavage to generate mature 5'-end of SSU-rRNA from (SSU-rRNA, 5.8S rRNA, LSU-rRNA)	12 out of 549 genes, 2.2%	15 out of 10340 background genes, 0.1%	1.52e-10	0	AN0305:AN0421:AN0475:AN10618:AN1434:AN1533:nop58:AN4298:AN5785:AN6265:AN6556:AN7305	34462:447:480:472:6461:9267:42273:36170:8298:71216:56:36180:35690
480	endonucleolytic cleavage in 5'-ETS of tricistronic rRNA transcript (SSU-rRNA, 5.8S rRNA, LSU-rRNA)	12 out of 549 genes, 2.2%	15 out of 10340 background genes, 0.1%	1.52e-10	0	AN0305:AN0421:AN0475:AN10618:AN1434:AN1533:nop58:AN4298:AN5340:AN6265:AN6556:AN7305	34462:447:480:472:9267:42273:36170:8298:71216:56:36180:35690
966	RNA 5'-end processing	12 out of 549 genes, 2.2%	15 out of 10340 background genes, 0.1%	1.52e-10	0	AN0305:AN0421:AN0475:AN10618:AN1434:AN1533:nop58:AN4298:AN5785:AN6265:AN6556:AN7305	34462:447:480:472:6461:9267:42273:36170:8298:71216:56:36180:35690
967	rRNA 5'-end processing	12 out of 549 genes, 2.2%	15 out of 10340 background genes, 0.1%	1.52e-10	0	AN0305:AN0421:AN0475:AN10618:AN1434:AN1533:nop58:AN4298:AN5785:AN6265:AN6556:AN7305	34462:447:480:472:6461:9267:42273:36170:8298:71216:56:36180:35690
44237	cellular metabolic process	226 out of 549 genes, 41.2%	2829 out of 10340 background genes, 27.4%	4.26e-10	0	AN0067:AN0072:AN0074:AN0092:AN0133:AN0142:AN0190:AN0228:ivoB:AN0237:AN0247:AN0260:AN0262:AN0271:AN0305:AN0312:AN0421:AN0465:AN0475:AN0490:AN0647:AN0695:AN0745:AN0796:AN0843:AN0889:AN0907:AN0956:AN10087:AN10182:AN10189:AN10248:AN10352:AN10361:AN10396:AN10433:AN1045:FKBP5:AN10497:rmtA:AN10551:AN10614:AN10618:AN10648:AN10701:AN10712:AN10740:AN10755:ndiF:AN10943:AN10955:AN10970:pabaB:cgrA:AN11183:AN1…	6490:1901907:70893:6279:55:1932:48478:6281:463:48315:55085:43558:7004:1900617:45292:36289:42254:70901:30174:71040:33523:71459:9113:43066:742:51567:46081:8361:8295:70843:1732:10512:1903459:1902626:44182:6334:6007:6091:6240:727:495:31929:320:71470:70481:42276:31054:957:34476:280:6307:15784:6351:6366:30702:6489:30466:2183:1901911:19184:412:6267:1990417:30100:35863:32265:1934:154:6616:71042:747:6730:…
71704	organic substance metabolic process	239 out of 549 genes, 43.5%	3088 out of 10340 background genes, 29.9%	1.91e-09	0	AN0067:AN0072:AN0074:AN0092:AN0133:AN0142:AN0190:AN0228:ivoB:AN0237:AN0247:AN0260:AN0262:AN0271:AN0299:AN0305:AN0312:AN0421:AN0465:AN0475:AN0490:gelB:AN0647:AN0695:AN0745:AN0796:AN0843:AN0851:AN0889:AN0907:AN0956:AN10087:AN10182:AN10189:AN10248:AN10352:AN10361:AN10396:AN10433:AN1045:FKBP5:AN10497:rmtA:AN10551:AN10614:AN10618:AN10648:AN10701:AN10712:AN10740:AN10755:AN10943:AN10955:AN10970:pabaB:cg…	6490:1901907:70893:6279:55:1932:48478:6281:463:48315:55085:43558:7004:1900617:45292:36289:42254:70901:30174:71040:33523:71459:9113:43066:742:51567:46081:8361:8295:70843:1732:10512:1903459:16052:1902626:44182:6334:6007:6240:727:495:31929:320:71470:70481:42276:31054:957:34476:280:6307:15784:6351:6366:30702:6489:30466:2183:1901911:19184:412:51604:6267:1990417:30100:35863:32265:1934:154:6616:71042:74…
34645	cellular macromolecule biosynthetic process	82 out of 549 genes, 14.9%	716 out of 10340 background genes, 6.9%	1.13e-08	0	AN0142:AN0228:AN0260:AN0262:AN0312:AN0465:AN0843:AN0889:AN0907:AN10087:AN10182:AN10497:AN10614:AN10740:AN10755:AN10970:AN11183:AN11411:AN1166:AN1228:AN12419:hscA:AN1345:AN1709:AN1964:bipA:AN2148:AN2275:AN2283:AN2415:AN2734:AN2747:AN2980:AN2997:AN3172:AN3411:AN3413:AN3595:AN3832:AN3944:rps16:rpl16a:AN4222:AN4251:AN4594:AN4613:ssz1:AN4652:AN4771:AN5014:AN5114:AN5222:AN5719:AN5824:AN5888:AN5960:AN59…	70893:6279:48478:463:55085:43558:7004:30174:43066:742:1732:1903459:44182:727:31929:71470:42276:6307:15784:6351:6366:30702:6489:2183:6267:30100:6616:51097:33314:51083:6269:9060:288:723:2000678:30433:44416:2000679:447:70880:42149:70987:71455:1990516:1902969:734:6414:45950:6452:122:16070:45903:1904161:6415:18188:10620:1900153:42790:6363:70184:97308:10969:6270:27:42274:42797:6486:43111:6612:45947:709…
9059	macromolecule biosynthetic process	83 out of 549 genes, 15.1%	729 out of 10340 background genes, 7.1%	1.13e-08	0	AN0142:AN0228:AN0260:AN0262:AN0312:AN0465:AN0843:AN0889:AN0907:AN10087:AN10182:AN10497:AN10614:AN10740:AN10755:AN10970:AN11183:AN11411:AN1166:AN1228:AN12419:hscA:AN1345:AN1709:AN1964:bipA:AN2148:AN2275:AN2283:AN2415:AN2734:AN2747:AN2980:AN2997:AN3172:AN3411:AN3413:AN3595:AN3832:AN3944:rps16:rpl16a:AN4222:AN4251:AN4594:AN4613:ssz1:AN4652:AN4771:AN5014:AN5114:AN5222:AN5719:AN5824:AN5888:AN5960:AN59…	70893:6279:48478:463:55085:43558:7004:30174:43066:742:1732:1903459:44182:727:31929:71470:42276:6307:15784:6351:6366:30702:6489:2183:6267:30100:6616:51097:9405:33314:51083:6269:9060:288:723:2000678:30433:44416:2000679:447:70880:42149:70987:6031:71455:1990516:1902969:734:6414:45950:6452:122:16070:45903:1904161:6415:18188:10620:1900153:42790:6363:70184:97308:10969:6270:27:42274:42797:6486:43111:6612…
27	ribosomal large subunit assembly	13 out of 549 genes, 2.4%	23 out of 10340 background genes, 0.2%	1.4e-08	0	AN0262:AN10058:AN10955:AN1166:AN1200:AN2734:spb4:AN4232:AN4471:AN4771:AN6310:AN6902:AN8834	55:463:30174:8361:1902626:30702:6267:747:6414:27:9267:2181:6412:36170:956:71216:470:36180:466:6364:35690
15931	nucleobase-containing compound transport	24 out of 549 genes, 4.4%	89 out of 10340 background genes, 0.9%	1.67e-08	0	AN0843:rmtA:AN10618:AN10943:AN11250:AN1215:hscA:AN1666:AN1711:AN3172:AN3413:AN3455:AN3706:rrs1:rps16:AN4068:AN5789:AN5865:AN6632:AN6651:nic96:AN8834:gmtA:AN9398	55:463:55085:1902626:44182:70481:15784:35246:51083:44416:447:42149:480:467:70476:6999:6452:45903:6409:1900153:472:27:42274:6486:71038:60567:6450:34427:71035:30490:9267:282:2181:18195:6412:6606:15786:42273:6407:36170:30448:32968:71216:51278:7163:72334:56:54:36180:469:6406:42255:466:28:16973:6364:461:42493:35690
33750	ribosome localization	12 out of 549 genes, 2.2%	21 out of 10340 background genes, 0.2%	7.31e-08	0	AN10618:AN10943:AN1215:hscA:AN1666:AN1711:rrs1:AN5789:AN5865:AN6632:nic96:AN8834	55:463:1902626:44182:51083:44416:447:42149:480:70476:6999:6452:1900153:472:27:6450:30490:282:2181:6412:6606:42273:6407:56:54:469:42255:466:16973:28:6364:42493:35690
33753	establishment of ribosome localization	12 out of 549 genes, 2.2%	21 out of 10340 background genes, 0.2%	7.31e-08	0	AN10618:AN10943:AN1215:hscA:AN1666:AN1711:rrs1:AN5789:AN5865:AN6632:nic96:AN8834	55:463:1902626:44182:51083:44416:447:42149:480:70476:6999:6452:1900153:472:27:6450:30490:282:2181:6412:6606:42273:6407:56:54:469:42255:466:16973:28:6364:42493:35690
54	ribosomal subunit export from nucleus	12 out of 549 genes, 2.2%	21 out of 10340 background genes, 0.2%	7.31e-08	0	AN10618:AN10943:AN1215:hscA:AN1666:AN1711:rrs1:AN5789:AN5865:AN6632:nic96:AN8834	55:463:1902626:44182:51083:44416:447:42149:480:70476:6999:6452:1900153:472:27:6450:30490:282:2181:6412:6606:42273:6407:56:54:469:42255:466:16973:28:6364:42493:35690
34622	cellular macromolecular complex assembly	40 out of 549 genes, 7.3%	243 out of 10340 background genes, 2.4%	9.84e-08	0	AN0228:AN0262:tubA:AN0421:AN10058:rpf2:FKBP5:AN10955:AN1166:benA:AN11929:AN1200:aspD:AN2734:AN2907:AN3172:spb4:rrs1:AN4232:AN4471:AN4560:AN4771:AN4891:AN5222:AN5865:AN5960:AN6067:AN6070:AN6310:AN6600:AN6632:AN6902:AN7260:AN7305:AN7440:napB:aspC:AN8187:AN8491:AN8834	1410:6279:55:921:1932:48478:463:48311:30174:33523:8361:226:1732:7019:1902626:6334:6033:727:280:30702:30466:8105:412:6267:747:70783:34613:9405:71963:70196:32436:34462:6337:35066:447:6348:415:6303:480:34501:34080:70317:1902969:43486:6457:6414:40023:16070:281:1900153:472:43618:6270:30011:27:40009:6336:45947:44406:30473:34508:30490:51228:1903087:9267:16573:48312:2181:6412:42256:70787:42273:6407:36170…
6913	nucleocytoplasmic transport	23 out of 549 genes, 4.2%	91 out of 10340 background genes, 0.9%	1.84e-07	0	AN0843:rmtA:AN10618:AN10943:AN11250:AN1215:hscA:AN1666:AN1711:AN3172:AN3413:AN3455:AN3706:rrs1:rps16:AN5789:AN5865:cse1:AN6632:AN6651:nic96:AN8834:AN9398	55:463:1902626:44182:70481:6611:35246:51083:44416:447:42149:480:467:70476:6999:6452:45903:6409:1900153:472:27:42274:71038:60567:6450:34427:71035:30490:9267:282:2181:18195:6412:6606:42273:6407:36170:32968:71216:56:54:36180:469:6406:42255:466:28:16973:6364:461:42493:35690
51169	nuclear transport	23 out of 549 genes, 4.2%	92 out of 10340 background genes, 0.9%	2.34e-07	0	AN0843:rmtA:AN10618:AN10943:AN11250:AN1215:hscA:AN1666:AN1711:AN3172:AN3413:AN3455:AN3706:rrs1:rps16:AN5789:AN5865:cse1:AN6632:AN6651:nic96:AN8834:AN9398	55:463:1902626:44182:70481:6611:35246:51083:44416:447:42149:480:467:70476:6999:6452:45903:6409:1900153:472:27:42274:71038:60567:6450:34427:71035:30490:9267:282:2181:18195:6412:6606:42273:6407:36170:32968:71216:56:54:36180:469:6406:42255:466:28:16973:6364:461:42493:35690
65003	macromolecular complex assembly	41 out of 549 genes, 7.5%	263 out of 10340 background genes, 2.5%	3.22e-07	0	AN0228:AN0262:tubA:AN0421:AN10058:rpf2:FKBP5:AN10955:AN1166:benA:AN11929:AN1200:aspD:AN2734:AN2907:AN3172:spb4:rrs1:AN4232:AN4471:AN4560:AN4771:AN4891:AN5222:AN5785:AN5865:AN5960:AN6067:AN6070:AN6310:AN6600:AN6632:AN6902:AN7260:AN7305:AN7440:napB:aspC:AN8187:AN8491:AN8834	1410:6279:55:921:1932:48478:463:48311:30174:33523:8361:226:1732:7019:1902626:6334:6033:727:280:30702:30466:8105:412:6267:747:70783:34613:9405:71963:70196:32436:34462:6337:35066:447:6348:415:6303:480:34501:34080:70317:1902969:43486:6457:6414:40023:16070:281:1900153:472:43618:6270:30011:27:40009:6336:45947:6461:44406:30473:34508:30490:51228:1903087:9267:16573:48312:2181:6412:42256:70787:42273:6407:…
43933	macromolecular complex subunit organization	45 out of 549 genes, 8.2%	316 out of 10340 background genes, 3.1%	8.94e-07	0	AN0133:AN0228:AN0262:tubA:AN0421:AN10058:rpf2:FKBP5:AN10955:AN1166:benA:AN11929:AN1200:aspD:AN1859:AN2734:AN2907:AN3172:spb4:rrs1:AN4232:AN4471:AN4560:AN4771:AN4891:AN5222:AN5785:AN5865:AN5960:AN6067:AN6070:AN6310:AN6600:AN6632:AN6902:nic96:AN7260:AN7305:AN7440:AN7554:napB:aspC:AN8187:AN8491:AN8834	1410:6279:55:921:1932:48478:6281:463:48311:30174:33523:8361:226:1732:7019:1902626:6334:6033:727:280:6307:30702:30466:8105:412:6267:747:70783:34613:9405:71963:288:70196:2000678:32436:34462:6337:35066:2000679:447:6348:415:6303:480:34501:6999:34080:70317:71455:1902969:43486:6457:6414:40023:16070:281:6415:18188:10620:1900153:472:43618:6270:30011:27:40009:6336:45947:6461:44406:30473:34508:30490:51228:…
9987	cellular process	258 out of 549 genes, 47.0%	3658 out of 10340 background genes, 35.4%	5.05e-06	0	tmpA:AN0067:AN0072:AN0074:AN0092:AN0133:AN0142:AN0190:AN0228:ivoB:AN0237:AN0247:AN0260:AN0262:AN0271:AN0305:AN0312:tubA:AN0421:AN0465:vcxA:AN0475:AN0490:gelB:AN0647:AN0695:AN0745:AN0796:AN0843:AN0889:AN0907:AN0946:AN0956:AN10058:AN10087:AN10182:AN10189:rpf2:AN10248:mnpA:AN10352:AN10361:AN10396:AN10433:AN1045:FKBP5:AN10497:rmtA:AN10551:AN10614:AN10618:AN10648:AN10701:AN10712:AN10740:AN10755:ndiF:A…	6974:6490:1410:1901907:70893:6279:921:55:1932:48478:6281:463:55085:48315:43558:7004:1900617:48311:70417:45292:36289:75306:42254:70901:30174:71040:33523:71459:9113:43066:742:51567:46081:8361:8295:226:70843:1732:10512:1903459:7019:1902626:44182:6334:6007:6091:6240:6033:727:495:31929:320:71470:70481:42276:31054:957:34476:280:6307:15784:6351:6366:30702:6489:30466:2183:34599:1901911:19184:8105:412:626…
9451	RNA modification	18 out of 549 genes, 3.3%	72 out of 10340 background genes, 0.7%	2.09e-05	0	AN0072:AN0247:AN0695:AN0745:AN0956:AN10248:AN10361:AN10551:AN10712:AN2451:AN3313:AN5789:AN5871:AN8066:nop10:AN8799:swoC:trm1	48315:42254:70901:495:154:2939:447:6547:70476:6400:70317:31118:6139:2940:6357:17183:30010:44030:30488:282:1990481:494:42273:6413:31167:462:55114:31120:56:51211:469:1904812:8033:2098:1990258:6897
55	ribosomal large subunit export from nucleus	7 out of 549 genes, 1.3%	9 out of 10340 background genes, 0.1%	3.25e-05	0	AN10943:AN1215:AN1666:AN1711:rrs1:nic96:AN8834	55:463:447:6999:27:6606:42273:42255:466:16973:42493:35690
44271	cellular nitrogen compound biosynthetic process	80 out of 549 genes, 14.6%	816 out of 10340 background genes, 7.9%	3.34e-05	0	AN0067:AN0142:AN0260:AN0262:AN0312:AN0465:AN0490:AN0843:AN0889:AN0907:AN10087:AN10182:AN10614:AN10740:AN10755:AN10970:pabaB:AN11183:AN11411:AN1166:AN1228:AN12419:hscA:AN1345:AN1524:AN1709:AN1964:AN2275:AN2283:AN2415:easA:easD:ipnA:aatA:AN2734:AN2747:AN2980:AN2997:AN3172:AN3411:AN3413:AN3595:AN3832:AN3944:rps16:rpl16a:AN4222:AN4251:AN4594:AN4613:ssz1:AN4652:AN5014:AN5222:AN5719:AN5960:AN6067:AN650…	70893:6279:463:43558:7004:1900617:9113:43066:8295:1732:1903459:44182:6240:31929:71470:42276:6307:6351:6366:2183:19184:32265:6730:9405:51083:46100:6269:288:723:2000678:44416:2000679:447:43173:42149:70987:6031:71455:6221:70317:1900781:1900809:734:9396:6414:6139:6452:122:16070:45903:1904161:6415:18188:10620:1900153:42790:6363:70184:97308:27:42274:2001310:42797:1900805:19748:45947:70914:6450:9847:343…
154	rRNA modification	8 out of 549 genes, 1.5%	14 out of 10340 background genes, 0.1%	0.00011	0	AN0247:AN0695:AN0745:AN3313:AN5789:AN5871:nop10:swoC	48315:495:154:447:6547:70476:70317:31118:30010:282:1990481:494:42273:31167:462:31120:56:51211:469:1904812:8033:1990258:6897
28	ribosomal small subunit assembly	7 out of 549 genes, 1.3%	11 out of 10340 background genes, 0.1%	0.00027	0	AN0421:AN11929:AN3172:AN5222:AN5960:AN6632:AN7305	34462:447:480:1900153:472:30490:2181:6412:6407:462:56:469:28:6364:461
1901566	organonitrogen compound biosynthetic process	68 out of 549 genes, 12.4%	696 out of 10340 background genes, 6.7%	0.00045	0	AN0067:AN0142:AN0262:AN0465:AN0490:AN0843:AN0889:AN0907:AN10182:AN10614:AN10701:AN10740:pabaB:AN11411:AN1166:AN1228:hscA:AN1345:AN1524:AN1709:AN1964:AN2275:easA:easD:ipnA:aatA:AN2734:AN2980:AN2997:AN3172:AN3411:AN3413:AN3595:AN3832:rps16:rpl16a:AN4222:AN4251:AN4290:AN4594:AN4613:ssz1:AN4652:AN5014:AN5222:AN5444:AN5719:AN5824:AN5888:AN5959:AN5960:AN6067:AN6500:AN6629:AN6632:AN6679:AN6698:AN6843:AN…	463:55085:43558:1900617:9113:43066:8295:1732:10512:44182:6240:31929:71470:6307:15784:6489:2183:19184:30100:32265:6730:9405:51083:46100:9060:288:723:9073:70887:2000678:44416:2000679:447:43173:42149:6031:71455:6221:70317:1900781:1900809:9396:6414:6139:6452:16070:45903:6415:18188:10620:1900153:70184:97308:10969:27:42274:2001310:1900805:6486:6612:19748:6659:45947:6450:9847:34337:1900557:1900772:32543…
2181	cytoplasmic translation	12 out of 549 genes, 2.2%	41 out of 10340 background genes, 0.4%	0.00073	0	AN0889:AN10182:AN1166:hscA:AN2275:AN2734:AN2980:AN2997:AN3172:ssz1:AN5719:AN6067	1732:44182:71470:2183:51083:44416:447:42149:6414:6452:16070:97308:27:45947:6450:9267:2181:42256:6407:36170:71216:54:36180:28:6364:461:45860:35690
6399	tRNA metabolic process	21 out of 549 genes, 3.8%	123 out of 10340 background genes, 1.2%	0.00152	0.0007	AN0072:AN0190:AN0745:AN0956:AN10248:AN10361:AN10551:AN11183:AN11250:AN11773:AN12203:AN1709:AN2415:AN2451:AN2747:AN2847:AN6244:AN6558:AN8066:AN8799:trm1	70893:70901:71040:70481:31054:34476:6366:71042:2939:379:467:6400:71049:34475:33621:6139:2940:6379:6357:34473:70184:42797:71038:17183:34427:71036:34337:71035:6360:973:44030:30488:71044:1990481:494:372:16075:6413:31167:71039:55114:71051:71037:16973:8033:2098:1990258:35690
44249	cellular biosynthetic process	108 out of 549 genes, 19.7%	1350 out of 10340 background genes, 13.1%	0.00428	0.001	AN0067:AN0142:AN0228:ivoB:AN0260:AN0262:AN0312:AN0465:AN0490:AN0843:AN0889:AN0907:AN10087:AN10182:AN10248:AN10396:AN10497:AN10614:AN10648:AN10701:AN10740:AN10755:AN10970:pabaB:AN11183:AN11411:AN1166:AN1228:AN12419:hscA:AN1345:AN1524:AN1709:AN1964:bipA:AN2148:AN2275:AN2283:AN2415:easA:easD:ipnA:aatA:AN2734:AN2747:AN2980:AN2997:AN3172:AN3411:AN3413:AN3595:AN3638:AN3832:AN3944:rps16:rpl16a:AN4222:AN…	70893:6279:48478:463:55085:43558:7004:1900617:30174:9113:43066:742:8295:1732:10512:1903459:44182:6240:727:31929:71470:42276:6307:15784:6351:6366:30702:6489:2183:19184:6267:30100:32265:6616:6730:51097:9405:33314:51083:46100:6269:9060:288:723:9073:70887:2000678:30433:44416:2000679:447:43173:70880:42149:70987:6031:71455:6221:70317:1990516:1900781:1902969:1900809:734:43324:9396:6414:42438:6139:45950:…
51029	rRNA transport	6 out of 549 genes, 1.1%	11 out of 10340 background genes, 0.1%	0.00693	0.0014	AN0843:AN3172:AN3413:AN3706:rps16:AN6632	447:45903:1900153:42274:30490:2181:6412:6407:56:469:28:461
6407	rRNA export from nucleus	6 out of 549 genes, 1.1%	11 out of 10340 background genes, 0.1%	0.00693	0.0014	AN0843:AN3172:AN3413:AN3706:rps16:AN6632	447:45903:1900153:42274:30490:2181:6412:6407:56:469:28:461
1901576	organic substance biosynthetic process	109 out of 549 genes, 19.9%	1386 out of 10340 background genes, 13.4%	0.0084	0.0016	AN0067:AN0142:AN0228:ivoB:AN0260:AN0262:AN0312:AN0465:AN0490:AN0843:AN0889:AN0907:AN10087:AN10182:AN10396:AN10497:AN10614:AN10648:AN10701:AN10740:AN10755:AN10970:pabaB:AN11183:AN11411:AN1166:AN1228:AN12419:hscA:AN1345:AN1524:AN1709:AN1964:bipA:AN2148:AN2275:AN2283:AN2415:easA:easD:ipnA:aatA:AN2734:AN2747:AN2980:AN2997:pgmA:AN3172:AN3411:AN3413:AN3595:AN3638:AN3832:AN3944:rps16:rpl16a:AN4222:AN425…	6490:70893:6279:48478:463:55085:43558:7004:1900617:30174:9113:43066:742:8295:1732:10512:1903459:44182:6007:6240:727:31929:71470:42276:6307:15784:6351:6366:30702:6489:2183:19184:6267:30100:32265:6616:6730:51097:9405:33314:51083:46100:6269:9060:288:723:9073:70887:2000678:30433:44416:2000679:447:43173:70880:42149:70987:6031:71455:6221:70317:1990516:1900781:1902969:1900809:734:43324:9396:6414:42438:6…
22607	cellular component assembly	42 out of 549 genes, 7.7%	392 out of 10340 background genes, 3.8%	0.00871	0.0016	AN0228:AN0262:tubA:AN0421:AN10058:rpf2:FKBP5:AN10955:AN1166:benA:AN11929:AN1200:aspD:AN2734:AN2907:AN3172:spb4:rrs1:AN4232:AN4471:AN4560:AN4771:AN4891:AN5222:AN5785:AN5865:AN5960:AN6067:AN6070:AN6310:AN6600:AN6632:AN6902:AN7260:AN7305:AN7440:napB:aspC:AN8187:AN8491:AN8834:AN9380	1410:6279:55:921:1932:48478:463:48311:30174:33523:8361:226:1732:7019:1902626:6334:6033:727:280:30702:30466:8105:412:6267:747:70783:34613:9405:71963:70196:32436:34462:6337:35066:447:6348:415:6303:480:34501:34080:70317:1902969:43486:6457:6414:40023:16070:281:1900153:472:43618:6270:30011:27:40009:30476:6336:45947:6461:44406:30473:34508:30490:51228:1903087:9267:16573:48312:2181:6412:42256:70787:42273…
51656	establishment of organelle localization	16 out of 549 genes, 2.9%	90 out of 10340 background genes, 0.9%	0.01532	0.002	AN10618:AN10943:benA:AN1215:hscA:aspD:AN1666:AN1711:nudK:rrs1:AN5789:AN5815:AN5865:AN6632:nic96:AN8834	1410:921:55:463:48315:7019:1902626:44182:6033:320:8105:7097:70783:9405:71963:51083:44416:447:42149:480:34501:70476:6999:6452:2000775:40023:281:1900153:472:98783:27:40009:6450:44406:7094:33316:30473:7076:30490:51228:1903087:282:48312:2181:6412:6606:70787:42273:6407:90699:30448:51258:7017:31505:56:54:70:34503:469:42255:31122:466:16973:28:6364:42493:51316:35690
9058	biosynthetic process	113 out of 549 genes, 20.6%	1472 out of 10340 background genes, 14.2%	0.01679	0.002	AN0067:AN0142:AN0228:ivoB:AN0260:AN0262:AN0312:AN0465:AN0490:AN0843:AN0889:AN0907:AN10087:AN10182:AN10248:AN10396:AN10497:AN10614:AN10648:AN10701:AN10740:AN10755:AN10970:pabaB:AN11183:AN11411:AN1166:AN11823:AN1228:AN12419:hscA:AN1345:AN1524:AN1709:AN1964:bipA:AN2148:AN2275:AN2283:AN2415:easA:easD:ipnA:aatA:AN2734:AN2747:AN2980:AN2997:pgmA:AN3172:AN3411:AN3413:AN3595:AN3638:AN3832:AN3944:rps16:rpl…	6490:70893:6279:48478:463:55085:43558:7004:1900617:30174:9113:43066:742:8295:1732:10512:1903459:44182:6007:6240:727:31929:71470:42276:6307:15784:6351:6366:30702:6489:2183:19184:6267:30100:32265:6616:6730:51097:9405:33314:51083:46100:6269:9060:288:723:9073:70887:2000678:30433:44416:2000679:447:43173:70880:42149:70987:6031:71455:6221:70317:1990516:1900781:1902969:1900809:734:43324:9058:9396:6414:42…
42493	response to drug	26 out of 549 genes, 4.7%	200 out of 10340 background genes, 1.9%	0.01739	0.0022	AN0305:tubA:AN0946:AN10058:AN11773:benA:AN1200:AN1215:AN12203:bop1:AN1533:easA:AN2997:AN3455:rrs1:AN4456:AN4560:AN4923:AN5148:AN5865:AN5888:AN6902:AN7146:AN7260:cyp51B:AN9093	55:463:48311:70417:71040:226:7019:1902626:71470:31054:34476:280:6489:2183:19184:6267:71042:9405:71963:9060:6801:447:379:480:467:70317:1900781:71049:1900809:34475:33621:6409:6379:472:16125:34473:6270:27:6084:1900805:71038:19748:71036:9847:71035:30473:1900557:1900772:6696:973:51228:1903087:9267:48312:71044:45727:42273:36170:956:10142:6491:71039:55114:71216:51258:7163:71051:6487:7017:31505:71037:54:…
6360	transcription from RNA polymerase I promoter	7 out of 549 genes, 1.3%	18 out of 10340 background genes, 0.2%	0.01888	0.0022	AN0312:AN10970:AN11183:AN2415:AN2747:AN3944:AN6558	70893:6366:122:42790:6363:42797:6360
32259	methylation	13 out of 549 genes, 2.4%	64 out of 10340 background genes, 0.6%	0.02159	0.0024	AN0092:AN0745:AN10189:AN10361:rmtA:AN1445:hepA:AN5789:AN5871:AN6072:AN8066:AN8799:trm1	70901:71459:51567:30466:6508:35246:2939:447:6348:6547:70476:2940:7064:6306:1990141:60567:44030:30488:282:18195:494:42273:7534:6413:32968:31167:40008:56:6406:18216:32259:8033:6364:1990258:7535:42038
44267	cellular protein metabolic process	68 out of 549 genes, 12.4%	788 out of 10340 background genes, 7.6%	0.03243	0.0026	AN0142:AN0262:AN0465:AN0745:AN0843:AN0889:AN0907:AN10182:AN10189:AN10248:AN10433:FKBP5:rmtA:AN10614:AN10740:AN11411:AN1166:AN1228:hscA:AN1345:AN1445:AN1709:hepA:AN1964:bipA:cct1:AN2275:AN2734:AN2980:AN2997:AN3172:AN3411:AN3413:AN3595:AN3832:rps16:rpl16a:AN4222:AN4251:AN4594:AN4613:ssz1:AN4652:AN4891:AN5014:AN5222:AN5676:cct7:AN5719:AN5815:AN5824:AN5888:AN5960:AN6067:AN6072:AN6500:AN6629:AN6632:AN…	1932:463:55085:43558:36289:33523:71459:43066:742:51567:70843:1732:44182:6334:31929:320:71470:6307:15784:6489:30466:2183:412:30100:1934:6616:6508:35246:33314:51083:9060:288:723:1990443:2000678:6337:44416:30433:30970:35066:2000679:447:6348:415:70880:42149:34501:71455:43486:6457:44267:6414:6452:2000775:16070:281:45903:6415:18188:10620:1900153:43618:7064:98783:70184:97308:10969:44743:27:42274:40009:6…
1902626	assembly of large subunit precursor of preribosome	4 out of 549 genes, 0.7%	5 out of 10340 background genes, 0.0%	0.03261	0.0025	spb4:AN4560:AN5865:AN8491	463:1902626:27:42273:54:470:6364:35690
51640	organelle localization	17 out of 549 genes, 3.1%	106 out of 10340 background genes, 1.0%	0.03393	0.0025	tubA:AN10618:AN10943:benA:AN1215:hscA:aspD:AN1666:AN1711:nudK:rrs1:AN5789:AN5815:AN5865:AN6632:nic96:AN8834	1410:921:55:463:48315:48311:226:7019:1902626:44182:6033:320:280:8105:7097:70783:9405:71963:51083:44416:447:42149:480:34501:70476:6999:6452:2000775:40023:281:1900153:472:98783:27:40009:6450:44406:7094:33316:30473:7076:30490:51228:1903087:282:48312:2181:6412:6606:70787:42273:6407:90699:30448:51258:7017:31505:56:54:70:34503:469:42255:31122:466:16973:28:6364:42493:46785:51316:35690
1903362	regulation of cellular protein catabolic process	5 out of 549 genes, 0.9%	9 out of 10340 background genes, 0.1%	0.03783	0.0025	AN10087:AN10249:AN2148:AN2907:AN7554	6279:42276:6307:34613:288:70196:2000678:32436:2000679:70987:71455:32435:6415:18188:10620:70914:70989:6271:1903364:2000058:1900264:43433:1901487
6414	translational elongation	6 out of 549 genes, 1.1%	14 out of 10340 background genes, 0.1%	0.03931	0.0024	AN10614:hscA:AN2734:AN3832:ssz1:AN5719	43558:43066:44182:31929:51083:723:44416:42149:6414:6452:97308:27:6450:32543:2181:54:6364:45860
6261	DNA-dependent DNA replication	14 out of 549 genes, 2.6%	78 out of 10340 background genes, 0.8%	0.04565	0.0024	AN0228:AN0260:AN10087:AN10497:AN10755:AN2148:AN4771:AN5114:AN5992:AN6070:AN6300:AN7007:AN7260:AN7325	6279:48478:30174:1903459:727:42276:30702:6267:51097:33314:6269:70987:1990516:1902969:734:45950:16070:1904161:6270:27:43111:70914:6271:7534:31297:1902981:1903364:2000058:1902450:6268:1902975:6364:1900264:42493
2. FungiFun (https://elbe.hki-jena.de/fungifun/fungifun.php)
FunCat ID	FunCat description	FunCat main category	Gene ID(s)	Exact p-value	Adjusted p-value	# genes / category	# genes / input
12.01	ribosome biogenesis	Protein synthesis	ANIA_00074 | ANIA_00142 | ANIA_00204 | ANIA_00262 | ANIA_00465 | ANIA_00475 | ANIA_00583 | ANIA_00647 | ANIA_00695 | ANIA_00843 | ANIA_00844 | ANIA_00889 | ANIA_00907 | ANIA_00946 | ANIA_01175 | ANIA_01200 | ANIA_01215 | ANIA_01228 | ANIA_01319 | ANIA_01345 | ANIA_01366 | ANIA_01367 | ANIA_01434 | ANIA_01533 | ANIA_01666 | ANIA_01711 | ANIA_01964 | ANIA_02120 | ANIA_02275 | ANIA_02734 | ANIA_0292…	1.2202e-73	3.6971e-71	97 / 173	97 / 557
11.04.01	rRNA processing	Transcription	ANIA_00074 | ANIA_00092 | ANIA_00133 | ANIA_00204 | ANIA_00237 | ANIA_00305 | ANIA_00421 | ANIA_00475 | ANIA_00583 | ANIA_00589 | ANIA_00647 | ANIA_00695 | ANIA_00745 | ANIA_00796 | ANIA_00944 | ANIA_01164 | ANIA_01175 | ANIA_01215 | ANIA_01319 | ANIA_01367 | ANIA_01434 | ANIA_01533 | ANIA_01750 | ANIA_01949 | ANIA_01983 | ANIA_02077 | ANIA_02079 | ANIA_02147 | ANIA_02292 | ANIA_02734 | ANIA_0293…	9.1334e-67	1.3837e-64	94 / 182	94 / 557
12.01.01	ribosomal proteins	Protein synthesis	ANIA_00142 | ANIA_00204 | ANIA_00262 | ANIA_00421 | ANIA_00465 | ANIA_00583 | ANIA_00647 | ANIA_00745 | ANIA_00843 | ANIA_00907 | ANIA_01166 | ANIA_01200 | ANIA_01228 | ANIA_01345 | ANIA_01711 | ANIA_01750 | ANIA_01964 | ANIA_02147 | ANIA_02275 | ANIA_02734 | ANIA_02980 | ANIA_03172 | ANIA_03176 | ANIA_03413 | ANIA_03706 | ANIA_03744 | ANIA_04060 | ANIA_04202 | ANIA_04222 | ANIA_04232 | ANIA_0425…	9.5263e-36	9.6216e-34	64 / 163	64 / 557
16.03.03	RNA binding	Protein with binding function or cofactor requirement (structural or analytic)	ANIA_00133 | ANIA_00204 | ANIA_00211 | ANIA_00262 | ANIA_00305 | ANIA_00310 | ANIA_00359 | ANIA_00421 | ANIA_00475 | ANIA_00583 | ANIA_00647 | ANIA_00695 | ANIA_00745 | ANIA_00796 | ANIA_00944 | ANIA_01045 | ANIA_01164 | ANIA_01166 | ANIA_01434 | ANIA_01452 | ANIA_01533 | ANIA_01711 | ANIA_01750 | ANIA_01983 | ANIA_02147 | ANIA_02847 | ANIA_02932 | ANIA_03167 | ANIA_03176 | ANIA_03411 | ANIA_0342…	3.797e-33	2.8762e-31	83 / 302	83 / 557
11.02.01	rRNA synthesis	Transcription	ANIA_00074 | ANIA_00312 | ANIA_00421 | ANIA_00589 | ANIA_00647 | ANIA_00695 | ANIA_00745 | ANIA_00944 | ANIA_01949 | ANIA_02283 | ANIA_02415 | ANIA_02747 | ANIA_03167 | ANIA_03176 | ANIA_03313 | ANIA_03745 | ANIA_03827 | ANIA_03944 | ANIA_04346 | ANIA_04456 | ANIA_04618 | ANIA_04865 | ANIA_06171 | ANIA_06244 | ANIA_06558 | ANIA_07205 | ANIA_07424 | ANIA_08073 | ANIA_08272 | ANIA_08293 | ANIA_0910…	7.5333e-24	4.5652e-22	35 / 71	35 / 557
12.04	translation	Protein synthesis	ANIA_00133 | ANIA_00142 | ANIA_00262 | ANIA_00359 | ANIA_00421 | ANIA_00465 | ANIA_00843 | ANIA_01166 | ANIA_01228 | ANIA_01270 | ANIA_01345 | ANIA_01408 | ANIA_01964 | ANIA_02275 | ANIA_02734 | ANIA_02932 | ANIA_02980 | ANIA_02997 | ANIA_03055 | ANIA_03172 | ANIA_03411 | ANIA_03413 | ANIA_03706 | ANIA_04060 | ANIA_04202 | ANIA_04222 | ANIA_04290 | ANIA_04560 | ANIA_04594 | ANIA_04648 | ANIA_0501…	8.0491e-22	4.0648e-20	51 / 173	51 / 557
11.06.01	rRNA modification	Transcription	ANIA_00092 | ANIA_00647 | ANIA_00695 | ANIA_00745 | ANIA_03167 | ANIA_03313 | ANIA_04298 | ANIA_04456 | ANIA_05340 | ANIA_06171 | ANIA_08254 | ANIA_08834 | ANIA_08851 | ANIA_10352 | ANIA_10712	2.5932e-15	1.1225e-13	15 / 19	15 / 557
12.04.01	translation initiation	Protein synthesis	ANIA_00359 | ANIA_00944 | ANIA_01270 | ANIA_02907 | ANIA_02932 | ANIA_02997 | ANIA_03055 | ANIA_03411 | ANIA_04290 | ANIA_04908 | ANIA_05954 | ANIA_06067 | ANIA_06651 | ANIA_06700 | ANIA_07540 | ANIA_08066 | ANIA_10182 | ANIA_10765	1.1002e-8	4.1671e-7	18 / 59	18 / 557
16.01	protein binding	Protein with binding function or cofactor requirement (structural or analytic)	ANIA_00067 | ANIA_00074 | ANIA_00142 | ANIA_00190 | ANIA_00211 | ANIA_00228 | ANIA_00260 | ANIA_00262 | ANIA_00310 | ANIA_00316 | ANIA_00465 | ANIA_00610 | ANIA_00647 | ANIA_00695 | ANIA_00745 | ANIA_00796 | ANIA_00843 | ANIA_00889 | ANIA_01164 | ANIA_01166 | ANIA_01175 | ANIA_01182 | ANIA_01215 | ANIA_01228 | ANIA_01345 | ANIA_01367 | ANIA_01394 | ANIA_01408 | ANIA_01533 | ANIA_01666 | ANIA_0171…	6.2515e-8	2.1047e-06	136 / 1435	136 / 557
11.04.02	tRNA processing	Transcription	ANIA_00072 | ANIA_00190 | ANIA_00583 | ANIA_00956 | ANIA_01045 | ANIA_01750 | ANIA_05931 | ANIA_07424 | ANIA_08066 | ANIA_08799 | ANIA_09406 | ANIA_10125 | ANIA_10361	9.1349e-06	0.00027679	13 / 50	13 / 557
11.02.03	mRNA synthesis	Transcription	ANIA_00133 | ANIA_00204 | ANIA_00745 | ANIA_01319 | ANIA_01408 | ANIA_01709 | ANIA_01949 | ANIA_01962 | ANIA_02747 | ANIA_02907 | ANIA_03176 | ANIA_04456 | ANIA_05452 | ANIA_06085 | ANIA_06374 | ANIA_07305 | ANIA_07424 | ANIA_10125 | ANIA_11183	3.9807e-05	0.0010108	19 / 108	19 / 557
16.03	nucleic acid binding	Protein with binding function or cofactor requirement (structural or analytic)	ANIA_00133 | ANIA_00204 | ANIA_00359 | ANIA_00583 | ANIA_00589 | ANIA_01452 | ANIA_01750 | ANIA_01949 | ANIA_02748 | ANIA_02932 | ANIA_03176 | ANIA_03427 | ANIA_04233 | ANIA_04412 | ANIA_04903 | ANIA_05111 | ANIA_05222 | ANIA_05452 | ANIA_05931 | ANIA_06156 | ANIA_06374 | ANIA_08268 | ANIA_09093 | ANIA_09406 | ANIA_10765	4.0031e-05	0.0010108	25 / 166	25 / 557
10.01.03.03	ori recognition and priming complex formation	Cell cycle and DNA processing	ANIA_00228 | ANIA_00260 | ANIA_05676 | ANIA_05992 | ANIA_06070 | ANIA_07260 | ANIA_10497 | ANIA_10755	5.168e-05	0.0012045	8 / 23	8 / 557
10.01.03	DNA synthesis and replication	Cell cycle and DNA processing	ANIA_00067 | ANIA_00228 | ANIA_00260 | ANIA_01750 | ANIA_03035 | ANIA_03944 | ANIA_04233 | ANIA_04903 | ANIA_05114 | ANIA_05676 | ANIA_05992 | ANIA_06070 | ANIA_06300 | ANIA_07325 | ANIA_07609 | ANIA_08073 | ANIA_08187 | ANIA_10497 | ANIA_10755 | ANIA_10917	0.0001269	0.0027465	20 / 127	20 / 557
11.04.03.01	splicing	Transcription	ANIA_00133 | ANIA_00211 | ANIA_00310 | ANIA_00583 | ANIA_00695 | ANIA_00745 | ANIA_00944 | ANIA_01319 | ANIA_01408 | ANIA_01709 | ANIA_01750 | ANIA_02932 | ANIA_03427 | ANIA_04232 | ANIA_04233 | ANIA_04298 | ANIA_04412 | ANIA_04903 | ANIA_05452 | ANIA_05931 | ANIA_06085 | ANIA_06374 | ANIA_06690 | ANIA_07424 | ANIA_09085 | ANIA_10125 | ANIA_10765	0.00013771	0.0027818	27 / 200	27 / 557
12.07	translational control	Protein synthesis	ANIA_00421 | ANIA_01345 | ANIA_02932 | ANIA_03411 | ANIA_03413 | ANIA_04290 | ANIA_04330 | ANIA_04865 | ANIA_05222 | ANIA_05770 | ANIA_06067 | ANIA_06156 | ANIA_06540 | ANIA_08799 | ANIA_10249 | ANIA_10765	0.00016268	0.0030808	16 / 91	16 / 557
11.04	RNA processing	Transcription	ANIA_00583 | ANIA_00695 | ANIA_01354 | ANIA_01533 | ANIA_02147 | ANIA_03427 | ANIA_04298 | ANIA_04456 | ANIA_04617 | ANIA_06540 | ANIA_08293 | ANIA_11250	0.00018774	0.0031855	12 / 57	12 / 557
10.01.02	DNA topology	Cell cycle and DNA processing	ANIA_00133 | ANIA_00228 | ANIA_00583 | ANIA_01366 | ANIA_01750 | ANIA_02932 | ANIA_04233 | ANIA_04412 | ANIA_04903 | ANIA_05931 | ANIA_05992 | ANIA_06070 | ANIA_06374 | ANIA_07007 | ANIA_10497	0.00018924	0.0031855	15 / 83	15 / 557
01.05.13	transfer of activated C-1 groups	Metabolism	ANIA_00092 | ANIA_00745 | ANIA_01445 | ANIA_03313 | ANIA_05789 | ANIA_05871 | ANIA_08283 | ANIA_08799 | ANIA_09406 | ANIA_10361 | ANIA_10526	0.00023022	0.0036714	11 / 50	11 / 557
20.09.05	non-vesicular ER transport	Cellular transport, transport facilitation and transport routes	ANIA_02062 | ANIA_04616 | ANIA_07721 | ANIA_10202 | ANIA_11227	0.00054873	0.0083132	5 / 12	5 / 557
12.04.02	translation elongation	Protein synthesis	ANIA_01408 | ANIA_02734 | ANIA_03832 | ANIA_05719 | ANIA_06651 | ANIA_06700 | ANIA_08256	0.00090174	0.013011	7 / 26	7 / 557
42.10.07	nucleolus	Biogenesis of cellular components	ANIA_03167 | ANIA_03827 | ANIA_08851	0.00096849	0.013339	3 / 4	3 / 557
16.03.01	DNA binding	Protein with binding function or cofactor requirement (structural or analytic)	ANIA_00228 | ANIA_00260 | ANIA_00421 | ANIA_01200 | ANIA_01962 | ANIA_02147 | ANIA_02415 | ANIA_02747 | ANIA_02748 | ANIA_02847 | ANIA_02932 | ANIA_03035 | ANIA_03944 | ANIA_04618 | ANIA_04865 | ANIA_05111 | ANIA_05114 | ANIA_05676 | ANIA_05770 | ANIA_05992 | ANIA_06070 | ANIA_06156 | ANIA_06300 | ANIA_06558 | ANIA_06682 | ANIA_07143 | ANIA_07305 | ANIA_07325 | ANIA_07435 | ANIA_07609 | ANIA_0826…	0.0011307	0.014895	43 / 422	43 / 557
10.01.05.03	DNA recombination	Cell cycle and DNA processing	ANIA_00133 | ANIA_00583 | ANIA_01750 | ANIA_02847 | ANIA_02932 | ANIA_03035 | ANIA_04233 | ANIA_04412 | ANIA_04903 | ANIA_05931 | ANIA_06374 | ANIA_10917	0.0024584	0.031038	12 / 75	12 / 557
11.02.02	tRNA synthesis	Transcription	ANIA_00072 | ANIA_01045 | ANIA_02415 | ANIA_02747 | ANIA_06558 | ANIA_08272 | ANIA_09125 | ANIA_09406 | ANIA_11183	0.002797	0.033899	9 / 48	9 / 557
16.19.05	GTP binding	Protein with binding function or cofactor requirement (structural or analytic)	ANIA_00316 | ANIA_00889 | ANIA_01182 | ANIA_01215 | ANIA_01394 | ANIA_01408 | ANIA_01666 | ANIA_03832 | ANIA_04708 | ANIA_05865 | ANIA_06067 | ANIA_06266 | ANIA_06334 | ANIA_08182 | ANIA_08268	0.0041449	0.048304	15 / 111	15 / 557
Strain:	DatfA
Stress:	tBOOH
Group:	up-regulated genes
1. AspGD Gene Ontology Term Finder (http://www.aspergillusgenome.org/cgi-bin/GO/goTermFinder)
GOID	GO_term	Cluster frequency	Background frequency	Corrected P-value	False discovery rate	Gene(s) annotated to the term	Directly Annotated GOID List
15893	drug transport	7 out of 495 genes, 1.4%	14 out of 10340 background genes, 0.1%	0.00095	0	AN0581:AN0771:AN10949:AN12457:atrD:AN2349:atrB	71383:45332:6556:15903:6855:46618:35690:30003:70887:34599
6855	drug transmembrane transport	6 out of 495 genes, 1.2%	11 out of 10340 background genes, 0.1%	0.00296	0	AN0581:AN0771:AN10949:atrD:AN2349:atrB	71383:45332:6556:15903:46618:6855:35690:30003:70887:34599
55085	transmembrane transport	57 out of 495 genes, 11.5%	676 out of 10340 background genes, 6.5%	0.01177	0	antA:AN0404:AN0581:AN0601:AN0732:AN0771:pexG:AN10862:AN10949:AN10994:AN11209:enaB:atrD:AN2349:xtrC:AN2432:AN2468:AN2585:AN2707:AN2827:AN3210:AN3220:AN3221:xtrB:AN3311:AN3357:AN3722:AN3763:AN3997:AN4150:pmcB:hsp70:AN5140:AN5369:AN5540:AN5549:AN5681:AN6089:agtA:AN6258:acuJ:xtrA:AN6477:enaA:uapA:AN7137:AN7173:AN7200:mirA:AN8095:AN8365:atrB:AN8507:AN8768:AN8901:AN8955:AN9316	30448:90344:51131:6513:9437:97308:70778:44550:6813:6635:70887:15813:6084:15837:6631:55085:42906:71242:15903:6458:6556:30476:16558:9062:42268:45733:7163:6855:34605:50821:15867:30150:15976:6814:60:70588:43161:71383:16560:45333:6091:44267:71470:72318:16562:1905136:6853:46618:42026:1905135:97623:30003:51208:1900035:35617:34599:15747:51604:44011:51865:2181:6826:6616:3333:7031:45332:6874:209:45041:3569…
42026	protein refolding	5 out of 495 genes, 1.0%	9 out of 10340 background genes, 0.1%	0.01788	0	AN2432:AN2731:cyp7:hsp70:AN6089	90344:51131:97308:30433:6458:7163:413:42787:34605:50821:45047:30150:226:60:43161:35719:44267:71470:72318:42026:1900035:35617:51604:2181:6616:6626:209:45041
2. FungiFun (https://elbe.hki-jena.de/fungifun/fungifun.php)
FunCat ID	FunCat description	FunCat main category	Gene ID(s)	Exact p-value	Adjusted p-value	# genes / category	# genes / input
20.03.22	transport ATPases	Cellular transport, transport facilitation and transport routes	ANIA_00404 | ANIA_00771 | ANIA_01628 | ANIA_02300 | ANIA_02349 | ANIA_02669 | ANIA_02827 | ANIA_04912 | ANIA_04920 | ANIA_05350 | ANIA_06397 | ANIA_06642 | ANIA_07549 | ANIA_08365 | ANIA_08489 | ANIA_09344 | ANIA_10949	9.2666e-7	0.00028535	17 / 93	17 / 504
20.01.27	drug/toxin transport	Cellular transport, transport facilitation and transport routes	ANIA_00404 | ANIA_00581 | ANIA_00601 | ANIA_00732 | ANIA_00771 | ANIA_02300 | ANIA_02349 | ANIA_02707 | ANIA_03264 | ANIA_05140 | ANIA_05369 | ANIA_05540 | ANIA_06477 | ANIA_07200 | ANIA_07800 | ANIA_08095 | ANIA_08344 | ANIA_08365 | ANIA_08489 | ANIA_09316 | ANIA_09344 | ANIA_10862 | ANIA_10949	2.1432e-06	0.00028535	23 / 167	23 / 504
32.01.05	heat shock response	Cell rescue, defense and virulence	ANIA_00122 | ANIA_01047 | ANIA_02432 | ANIA_02731 | ANIA_04583 | ANIA_05129 | ANIA_05781 | ANIA_06089 | ANIA_06193 | ANIA_07892 | ANIA_08269	2.6752e-06	0.00028535	11 / 43	11 / 504
34.01.01.01	homeostasis of metal ions (Na, K, Ca etc.)	Interaction with the environment	ANIA_00771 | ANIA_00885 | ANIA_01628 | ANIA_02427 | ANIA_02827 | ANIA_03159 | ANIA_03763 | ANIA_04655 | ANIA_04920 | ANIA_05318 | ANIA_05610 | ANIA_05668 | ANIA_06272 | ANIA_06642 | ANIA_07173 | ANIA_07662 | ANIA_07800 | ANIA_08365 | ANIA_08489 | ANIA_09344 | ANIA_10486 | ANIA_10949	1.3422e-05	0.00087989	22 / 173	22 / 504
32.07.05	detoxification by export	Cell rescue, defense and virulence	ANIA_00404 | ANIA_00581 | ANIA_00601 | ANIA_00732 | ANIA_00771 | ANIA_02300 | ANIA_02349 | ANIA_02707 | ANIA_03264 | ANIA_05369 | ANIA_05540 | ANIA_06477 | ANIA_07200 | ANIA_08095 | ANIA_08344 | ANIA_08489 | ANIA_09344 | ANIA_10862 | ANIA_10949	1.3748e-05	0.00087989	19 / 136	19 / 504
32.01.07	unfolded protein response (e.g. ER quality control)	Cell rescue, defense and virulence	ANIA_01047 | ANIA_01163 | ANIA_01296 | ANIA_02051 | ANIA_02238 | ANIA_02432 | ANIA_04583 | ANIA_05129 | ANIA_05602 | ANIA_08269 | ANIA_09124 | ANIA_10778 | ANIA_10994	2.8446e-05	0.0015171	13 / 74	13 / 504
32.07	detoxification	Cell rescue, defense and virulence	ANIA_00581 | ANIA_00601 | ANIA_00771 | ANIA_02578 | ANIA_02669 | ANIA_02707 | ANIA_02798 | ANIA_03264 | ANIA_03849 | ANIA_04151 | ANIA_04912 | ANIA_05350 | ANIA_05369 | ANIA_05440 | ANIA_05540 | ANIA_05668 | ANIA_07199 | ANIA_07800 | ANIA_08365 | ANIA_08489 | ANIA_09344 | ANIA_10862 | ANIA_10949	0.00011008	0.0044838	23 / 212	23 / 504
20.03.25	ABC transporters	Cellular transport, transport facilitation and transport routes	ANIA_00404 | ANIA_00771 | ANIA_02300 | ANIA_02349 | ANIA_02707 | ANIA_07200 | ANIA_08095 | ANIA_08344 | ANIA_08365 | ANIA_08489 | ANIA_09344 | ANIA_10862 | ANIA_10949	0.00011209	0.0044838	13 / 84	13 / 504
2.45	energy conversion and regeneration	Energy	ANIA_00330 | ANIA_01840 | ANIA_05228 | ANIA_05843 | ANIA_06167 | ANIA_06753 | ANIA_08099 | ANIA_09384	0.00023053	0.0081966	8 / 37	8 / 504
20.09.03	peroxisomal transport	Cellular transport, transport facilitation and transport routes	ANIA_00257 | ANIA_00880 | ANIA_05681 | ANIA_06161 | ANIA_06279 | ANIA_08280	0.00037477	0.011993	6 / 22	6 / 504
Strain:	DatfA
Stress:	tBOOH
Group:	down-regulated genes
1. AspGD Gene Ontology Term Finder (http://www.aspergillusgenome.org/cgi-bin/GO/goTermFinder)
GOID	GO_term	Cluster frequency	Background frequency	Corrected P-value	False discovery rate	Gene(s) annotated to the term	Directly Annotated GOID List
42254	ribosome biogenesis	102 out of 625 genes, 16.3%	181 out of 10340 background genes, 1.8%	8.37e-75	0	AN0074:AN0092:rio2:AN0237:AN0247:AN0262:AN0305:AN0421:AN0465:AN0475:AN0647:AN0695:AN0745:AN0776:AN0796:AN0843:AN0946:AN10058:AN1013:rpf2:AN10352:AN10618:AN10712:AN10943:cgrA:AN1166:AN11773:AN11929:AN1200:AN1228:hscA:AN1319:AN1345:bop1:AN1533:AN1666:AN1711:AN1949:AN2292:AN2734:nsa2:AN3056:rmtB:nop58:AN3172:spb4:AN3313:AN3413:AN3706:rrs1:AN3827:rps16:AN4087:AN4232:AN4298:AN4469:AN4471:AN4475:AN4560…	398:51083:34473:51276:97308:6270:45944:31167:8298:55:6449:27:34462:44416:42274:463:48315:71039:447:2182:462:42254:71216:71038:6468:1905267:6547:42149:480:6310:30174:71040:31120:71051:467:70476:8361:30010:6450:71036:70317:56:31118:51211:71037:54:71049:6461:71035:470:1902626:44182:469:36180:495:34475:6414:42255:19919:32259:466:31054:973:16973:28:280:34476:33621:30490:1904812:30702:8033:9267:6452:28…
22613	ribonucleoprotein complex biogenesis	102 out of 625 genes, 16.3%	205 out of 10340 background genes, 2.0%	1.61e-67	0	AN0074:AN0092:rio2:AN0237:AN0247:AN0262:AN0305:AN0421:AN0465:AN0475:AN0647:AN0695:AN0745:AN0776:AN0796:AN0843:AN0946:AN10058:AN1013:rpf2:AN10352:AN10618:AN10712:AN10943:cgrA:AN1166:AN11773:AN11929:AN1200:AN1228:hscA:AN1319:AN1345:bop1:AN1533:AN1666:AN1711:AN1949:AN2292:AN2734:nsa2:AN3056:rmtB:nop58:AN3172:spb4:AN3313:AN3413:AN3706:rrs1:AN3827:rps16:AN4087:AN4232:AN4298:AN4469:AN4471:AN4475:AN4560…	398:51083:34473:51276:97308:6270:45944:31167:8298:55:6449:27:34462:44416:42274:463:48315:71039:447:2182:462:42254:71216:71038:6468:1905267:6547:42149:480:6310:30174:71040:31120:71051:467:70476:8361:30010:6450:71036:70317:56:31118:51211:71037:54:71049:6461:71035:470:1902626:44182:469:36180:495:34475:6414:42255:19919:32259:973:31054:466:16973:28:34476:280:33621:30490:1904812:30702:8033:9267:6452:28…
6364	rRNA processing	73 out of 625 genes, 11.7%	128 out of 10340 background genes, 1.2%	5.44e-53	0	AN0074:AN0092:rio2:AN0237:AN0247:AN0305:AN0421:AN0465:AN0475:AN0647:AN0695:AN0745:AN0776:AN0796:AN10352:AN10618:AN10943:cgrA:AN11773:AN11929:AN1228:hscA:AN1319:AN1345:bop1:AN1533:AN1949:AN2292:nsa2:AN3056:nop58:AN3172:spb4:AN3313:rrs1:AN4232:AN4298:AN4471:AN4594:ssz1:AN4648:AN4771:AN4803:AN5222:AN5340:AN5441:AN5520:AN5785:AN5789:AN5865:AN5871:AN6171:AN6265:AN6310:AN6374:AN6556:AN6612:AN6632:AN667…	398:51083:34473:97308:6270:31167:8298:55:27:34462:44416:42274:463:48315:71039:447:462:71216:71038:6468:1905267:6547:42149:480:6310:30174:71040:31120:71051:467:70476:8361:30010:6450:71036:70317:56:31118:51211:71037:54:71049:6461:71035:470:1902626:44182:469:36180:495:34475:42255:32259:973:31054:466:16973:28:34476:280:33621:30490:1904812:30702:8033:9267:6452:282:6267:6364:1990417:71044:2181:1990258:…
16072	rRNA metabolic process	75 out of 625 genes, 12.0%	140 out of 10340 background genes, 1.4%	8.88e-52	0	AN0074:AN0092:rio2:AN0237:AN0247:AN0305:AN0421:AN0465:AN0475:AN0647:AN0695:AN0745:AN0776:AN0796:AN10352:AN10618:AN10943:AN10970:cgrA:AN11773:AN11929:AN1228:hscA:AN1319:AN1345:bop1:AN1533:AN1949:AN2292:nsa2:AN3056:nop58:AN3172:spb4:AN3313:rrs1:AN3944:AN4232:AN4298:AN4471:AN4594:ssz1:AN4648:AN4771:AN4803:AN5222:AN5340:AN5441:AN5520:AN5785:AN5789:AN5865:AN5871:AN6171:AN6265:AN6310:AN6374:AN6556:AN66…	398:51083:34473:6363:97308:6270:31167:8298:55:27:34462:44416:42274:463:48315:71039:447:462:71216:71038:6468:1905267:6547:42149:480:6310:30174:71040:31120:71051:467:70476:8361:30010:6450:71036:70317:56:31118:51211:71037:54:71049:6461:71035:470:1902626:44182:469:36180:495:34475:42255:32259:973:31054:466:16973:28:34476:280:33621:30490:1904812:30702:8033:9267:6452:282:6267:6364:122:1990417:71044:2181…
34470	ncRNA processing	84 out of 625 genes, 13.4%	197 out of 10340 background genes, 1.9%	4.93e-48	0	AN0074:AN0092:rio2:AN0141:AN0237:AN0247:AN0305:AN0421:AN0465:AN0475:AN0647:AN0695:AN0745:AN0776:AN0796:AN0804:AN0956:AN10352:AN10551:AN10618:AN10832:AN10943:cgrA:AN11773:AN11929:AN1228:hscA:AN1319:AN1345:bop1:AN1533:AN1949:AN2153:AN2292:AN2451:nsa2:AN3056:nop58:AN3172:spb4:AN3313:rrs1:AN4232:AN4298:AN4471:AN4594:ssz1:AN4648:AN4771:AN4803:AN5222:AN5340:AN5441:AN5520:AN5785:AN5789:AN5865:AN5871:AN6…	398:51083:34473:6413:97308:32447:6270:45944:31167:8298:55:27:34462:44416:42274:463:48315:71039:447:70525:722:462:55114:71216:71038:6468:1905267:6547:42149:480:6310:30174:71040:31120:71051:467:70476:8361:30010:6450:6400:71036:70317:56:31118:51211:71037:54:71049:6461:71035:470:1902626:44182:469:36180:495:34475:42255:32259:973:31054:466:16973:28:34476:280:33621:30490:1904812:30702:8033:2098:9267:645…
34660	ncRNA metabolic process	91 out of 625 genes, 14.6%	260 out of 10340 background genes, 2.5%	1.41e-43	0	AN0074:AN0092:rio2:AN0141:AN0192:AN0237:AN0247:AN0305:AN0421:AN0465:AN0475:AN0647:AN0695:AN0745:AN0776:AN0796:AN0804:AN0956:AN10352:AN10551:AN10618:AN10712:AN10832:AN10943:AN10970:cgrA:AN11773:AN11929:AN1228:hscA:AN1319:AN1345:bop1:AN1533:AN1949:AN2153:AN2292:AN2415:AN2451:AN2747:nsa2:AN3056:nop58:AN3172:spb4:AN3313:rrs1:AN3944:AN4232:AN4298:AN4471:AN4594:ssz1:AN4648:AN4771:AN4803:AN5222:AN5340:A…	398:51083:34473:6363:6413:97308:70893:32447:6270:45944:31167:8298:55:27:34462:44416:42274:463:48315:71039:42797:447:70525:722:462:42254:55114:71216:71038:6468:1905267:6547:42149:480:6310:30174:71040:31120:71051:467:70476:8361:30010:6450:6400:71036:70317:56:31118:51211:71037:54:71049:6461:71035:6360:470:1902626:44182:469:36180:495:34475:42255:32259:973:31054:466:16973:28:34476:280:33621:30490:1904…
6396	RNA processing	87 out of 625 genes, 13.9%	287 out of 10340 background genes, 2.8%	7.49e-36	0	AN0074:AN0092:rio2:AN0141:AN0237:AN0247:AN0305:AN0421:AN0465:AN0475:AN0647:AN0695:AN0745:AN0776:AN0796:AN0804:AN0956:AN10352:AN10551:AN10618:AN10832:AN10943:cgrA:AN11773:AN11929:AN1228:hscA:AN1319:AN1345:bop1:AN1533:AN1949:rrp5:AN2153:AN2292:AN2451:nsa2:AN3056:nop58:AN3172:spb4:AN3313:rrs1:AN4232:AN4298:AN4471:AN4594:ssz1:AN4648:AN4771:AN4803:AN5222:AN5340:AN5408:AN5441:AN5520:AN5785:AN5789:AN586…	398:51083:34473:6413:97308:32447:6270:45944:31167:8298:55:27:34462:44416:42274:463:48315:71039:447:70525:722:462:55114:71216:71038:6468:1905267:6547:42149:480:6310:30174:71040:31120:71051:467:70476:8361:30010:6450:6400:71036:70317:56:31118:51211:71037:54:71049:6461:71035:6396:470:1902626:44182:469:36180:495:43488:34475:42255:32259:973:31054:466:16973:28:957:34476:280:33621:30490:1904812:30702:803…
42274	ribosomal small subunit biogenesis	42 out of 625 genes, 6.7%	70 out of 10340 background genes, 0.7%	9.01e-31	0	rio2:AN0247:AN0305:AN0421:AN0465:AN0475:AN0647:AN10618:AN11929:AN1319:AN1345:AN1533:AN1949:AN2292:AN3056:nop58:AN3172:AN3313:rrs1:rps16:AN4298:AN4594:AN4803:AN5222:AN5340:AN5441:AN5702:AN5785:AN5789:AN5979:AN6171:AN6265:AN6556:AN6632:AN6679:AN7107:AN7305:AN7526:AN8870:AN9097:AN9398:AN9468	398:8298:55:34462:463:42274:447:462:71216:6468:1905267:6547:480:6310:70476:6450:70317:56:6461:469:36180:42255:16973:28:30490:1904812:9267:282:6364:2181:1990417:6412:45903:46830:154:461:42273:1900153:6407:36170:472:35690
44085	cellular component biogenesis	115 out of 625 genes, 18.4%	568 out of 10340 background genes, 5.5%	8.51e-30	0	AN0074:AN0092:rio2:AN0237:AN0247:AN0262:AN0305:AN0421:AN0465:AN0475:AN0647:AN0695:AN0745:AN0776:AN0796:AN0843:AN0946:AN10058:AN1013:rpf2:AN10352:FKBP5:AN10618:AN10712:AN10943:cgrA:AN1166:AN11773:AN11929:AN1200:AN1228:hscA:AN1319:AN1345:bop1:AN1533:AN1666:AN1711:AN1837:AN1949:AN2292:AN2734:AN2907:nsa2:AN3056:rmtB:nop58:AN3172:spb4:AN3313:AN3413:AN3706:rrs1:AN3827:rps16:AN4087:AN4232:AN4298:AN4469:…	398:43936:42243:34473:916:97308:6270:45944:55:27:42274:463:48315:90561:9272:40009:42254:71038:6468:30476:1905267:51056:30174:71040:742:8361:30010:6450:1990942:71036:6038:9847:31671:6461:71035:7019:1902626:44182:6334:6091:495:90307:19919:7023:973:31054:70596:34476:280:30490:30702:9267:412:7264:282:6267:90529:1990417:71044:2181:18195:6412:1990481:1903477:154:494:71042:747:1902850:42273:71574:34613:…
10467	gene expression	142 out of 625 genes, 22.7%	823 out of 10340 background genes, 8.0%	9.75e-30	0	AN0074:AN0092:rio2:AN0141:AN0192:AN0237:AN0247:AN0262:AN0305:AN0312:AN0421:AN0433:AN0445:AN0465:AN0475:AN0647:AN0695:AN0745:AN0776:AN0796:AN0804:AN0843:AN0907:AN0956:AN1013:AN10182:AN10352:AN10416:AN10501:rmtA:AN10551:AN10614:AN10618:AN10681:AN10832:AN10943:AN10970:cgrA:AN11197:AN1122:AN1166:AN11773:AN11929:AN12246:AN1228:AN12419:hscA:AN1319:AN1345:bop1:AN1533:nosA:AN1949:rrp5:AN2153:AN2292:AN241…	398:34473:6363:97308:70893:6270:45944:55:27:42274:463:48315:43558:42797:70525:70791:722:42254:71038:6468:1905267:30174:71040:43066:8361:30010:60567:6450:71036:6461:71035:6360:1902626:44182:495:43488:31929:71470:32543:973:31054:957:34476:280:6307:30490:6355:6351:6366:30702:2183:9267:30488:282:6267:6302:1990417:71044:2181:18195:6412:1990481:154:494:71042:70787:747:70989:42273:6407:36170:956:448:352…
42273	ribosomal large subunit biogenesis	37 out of 625 genes, 5.9%	57 out of 10340 background genes, 0.6%	1.02e-28	0	AN0074:AN0237:AN0262:AN0776:AN0946:AN10058:AN1013:rpf2:AN10943:AN1166:AN1200:AN1228:bop1:AN1949:AN2734:nsa2:spb4:rrs1:AN4232:AN4469:AN4471:AN4475:AN4560:AN4771:AN5520:AN5702:AN5865:AN5871:rpl3:AN6310:AN6374:AN6556:AN6612:AN6902:AN7674:AN8247:AN8491	55:27:42274:463:30174:8361:1902626:280:30702:9267:6267:1990417:2181:6412:747:42273:36170:956:448:51276:31167:8298:447:462:71216:480:54:470:36180:6414:42255:466:6364:472:35690
30490	maturation of SSU-rRNA	36 out of 625 genes, 5.8%	60 out of 10340 background genes, 0.6%	4.25e-26	0	rio2:AN0247:AN0305:AN0421:AN0465:AN0475:AN10618:AN1319:AN1345:AN1533:AN1949:AN2292:AN3056:nop58:AN3172:AN3313:rrs1:AN4298:AN4594:AN4803:AN5222:AN5340:AN5441:AN5785:AN5789:AN6265:AN6556:AN6632:AN6679:AN7107:AN7305:AN7526:AN8870:AN9097:AN9398:AN9468	398:55:463:6468:1905267:6450:6461:30490:9267:282:2181:1990417:6412:154:42273:6407:36170:8298:34462:447:462:71216:6547:480:6310:70476:70317:56:469:36180:42255:16973:28:1904812:45903:46830:461:1900153:472:35690
462	maturation of SSU-rRNA from tricistronic rRNA transcript (SSU-rRNA, 5.8S rRNA, LSU-rRNA)	33 out of 625 genes, 5.3%	52 out of 10340 background genes, 0.5%	6.34e-25	0	rio2:AN0305:AN0421:AN0465:AN0475:AN10618:AN1319:AN1345:AN1533:AN1949:AN2292:nop58:AN3172:AN3313:rrs1:AN4298:AN4594:AN4803:AN5222:AN5340:AN5441:AN5785:AN5789:AN6265:AN6556:AN6679:AN7107:AN7305:AN7526:AN8870:AN9097:AN9398:AN9468	398:55:463:6468:1905267:6450:6461:9267:282:2181:1990417:6412:154:42273:6407:36170:8298:34462:447:462:71216:6547:480:6310:70476:56:36180:42255:16973:28:45903:46830:461:472:35690
6412	translation	57 out of 625 genes, 9.1%	199 out of 10340 background genes, 1.9%	3.28e-21	0	AN0262:AN0433:AN0445:AN0465:AN0776:AN0843:AN0907:AN1013:AN10182:AN10416:AN10614:AN10681:AN1122:AN1166:AN12246:AN1228:hscA:AN1345:AN2734:AN2980:AN2997:AN3172:AN3411:AN3413:AN3894:rps16:AN4073:AN4087:rpl16a:AN4222:AN4475:AN4494:AN4594:ssz1:AN4794:AN4802:AN4803:AN5014:AN5222:AN5441:AN5719:AN5979:AN5997:AN6181:rpl3:AN6500:AN6563:AN6629:AN6632:AN6679:AN6698:AN7554:AN8066:AN8870:AN9097:AN9465:AN9468	97308:45944:27:42274:463:43558:42254:43066:6450:44182:31929:71470:32543:6307:30490:2183:9267:30488:2181:6412:70989:6407:36170:448:16236:51083:288:6413:723:2000678:6099:6449:44416:2000679:447:2182:462:71216:42149:6310:71455:56:54:469:36180:6414:28:6452:6364:43433:45903:461:6415:45860:18188:10620:1900153:1901487:35690
43043	peptide biosynthetic process	60 out of 625 genes, 9.6%	234 out of 10340 background genes, 2.3%	1.1e-19	0	AN0262:AN0433:AN0445:AN0465:AN0776:AN0843:AN0907:AN1013:AN10182:AN10416:AN10614:AN10681:AN1122:AN1166:AN12246:AN1228:hscA:AN1345:easA:easD:AN2734:AN2980:AN2997:AN3172:AN3411:AN3413:AN3894:rps16:AN4073:AN4087:rpl16a:AN4222:AN4475:AN4494:AN4594:ssz1:AN4794:AN4802:AN4803:AN5014:AN5222:AN5441:AN5719:AN5979:AN5997:AN6181:rpl3:AN6500:AN6563:AN6629:AN6632:AN6679:AN6698:AN7554:AN8066:trxB:AN8870:AN9097:A…	97308:45944:27:42274:463:43558:2001310:1900617:1900805:42254:19748:43066:6450:9847:44182:31929:1900557:71470:1900772:32543:6307:30490:2183:19184:9267:30488:2181:6412:70989:6407:36170:448:9405:16236:51083:288:6413:723:2000678:6099:6449:44416:2000679:447:2182:462:55114:71216:42149:6310:31505:71455:56:1900781:54:469:1900809:36180:6414:28:36146:6452:6364:43433:45903:461:6415:45860:18188:10620:1900153…
6518	peptide metabolic process	60 out of 625 genes, 9.6%	255 out of 10340 background genes, 2.5%	1.23e-17	0	AN0262:AN0433:AN0445:AN0465:AN0776:AN0843:AN0907:AN1013:AN10182:AN10416:AN10614:AN10681:AN1122:AN1166:AN12246:AN1228:hscA:AN1345:easA:easD:AN2734:AN2980:AN2997:AN3172:AN3411:AN3413:AN3894:rps16:AN4073:AN4087:rpl16a:AN4222:AN4475:AN4494:AN4594:ssz1:AN4794:AN4802:AN4803:AN5014:AN5222:AN5441:AN5719:AN5979:AN5997:AN6181:rpl3:AN6500:AN6563:AN6629:AN6632:AN6679:AN6698:AN7554:AN8066:trxB:AN8870:AN9097:A…	97308:45944:27:42274:463:43558:2001310:1900617:1900805:42254:19748:43066:6450:9847:44182:31929:1900557:71470:1900772:32543:6307:30490:2183:19184:9267:30488:2181:6412:70989:6407:36170:448:9405:16236:51083:288:6413:723:2000678:6099:6449:44416:2000679:447:2182:462:55114:71216:42149:6310:31505:71455:56:1900781:54:469:1900809:36180:6414:28:36146:6452:6364:43433:45903:461:6415:45860:18188:10620:1900153…
16070	RNA metabolic process	105 out of 625 genes, 16.8%	683 out of 10340 background genes, 6.6%	6.32e-17	0	AN0074:AN0092:rio2:AN0141:AN0192:AN0237:AN0247:AN0305:AN0312:AN0421:AN0465:AN0475:AN0647:AN0695:AN0745:AN0776:AN0796:AN0804:AN0956:AN10352:AN10501:AN10551:AN10618:AN10712:AN10832:AN10943:AN10970:cgrA:AN11197:AN11773:AN11929:AN1228:AN12419:hscA:AN1319:AN1345:bop1:AN1533:nosA:AN1949:rrp5:AN2153:AN2292:AN2415:AN2451:AN2747:nsa2:AN3056:nop58:AN3172:spb4:AN3313:rrs1:AN3944:AN4232:AN4298:AN4471:AN4530:…	398:34473:6363:97308:70893:6270:45944:55:27:42274:463:48315:42797:70525:70791:722:42254:71038:6468:1905267:30174:71040:8361:30010:6450:71036:6461:71035:6360:1902626:44182:495:43488:70481:973:31054:957:34476:280:6307:30490:6355:6351:6366:30702:9267:30488:282:6267:6302:1990417:71044:2181:6412:1990481:154:494:71042:70787:747:70989:42273:6407:36170:956:448:51083:30448:288:70966:6413:32447:31167:8298:…
34641	cellular nitrogen compound metabolic process	175 out of 625 genes, 28.0%	1507 out of 10340 background genes, 14.6%	1.83e-16	0	AN0074:AN0092:rio2:AN0141:AN0192:AN0237:AN0247:AN0262:AN0305:AN0312:AN0421:AN0433:AN0445:AN0465:AN0475:AN0490:AN0501:AN0593:AN0647:spdA:AN0695:AN0745:AN0776:AN0796:AN0804:AN0843:AN0907:AN0956:brlA:AN1013:pyrD:AN10182:AN10352:AN10416:AN10501:AN10551:AN10614:AN10618:AN10681:AN10712:AN10832:AN10837:AN10943:AN10970:AN11080:AN11111:cgrA:AN11197:AN1122:AN1166:AN11773:AN11929:AN12246:AN1228:AN12419:hscA…	398:34473:43936:6363:9116:15074:1901907:70893:97308:35837:6270:45944:55:27:42274:463:48315:55085:6567:43558:2001310:7004:42797:1900617:70525:70791:722:1900805:19280:42254:6520:71038:6468:1905267:45461:30174:71040:19748:9113:43066:42426:45329:6555:8361:8295:30010:6450:71036:43945:42594:9847:6461:71035:6360:6334:1902626:44182:46855:495:43488:31929:1900557:71470:19919:70481:1900772:32543:973:31054:9…
43604	amide biosynthetic process	62 out of 625 genes, 9.9%	290 out of 10340 background genes, 2.8%	5.01e-16	0	AN0262:AN0433:AN0445:AN0465:spdA:AN0776:AN0843:AN0907:AN1013:AN10182:AN10416:AN10614:AN10681:AN1122:AN1166:AN12246:AN1228:hscA:AN1345:easA:easD:AN2734:AN2980:AN2997:AN3172:AN3411:AN3413:AN3894:rps16:AN4073:AN4087:rpl16a:AN4222:AN4475:AN4494:AN4594:ssz1:AN4794:AN4802:AN4803:AN5014:AN5222:AN5441:AN5719:AN5979:AN5997:AN6181:rpl3:AN6500:AN6563:AN6629:AN6632:AN6679:AN6698:aatB:AN7554:AN8066:trxB:AN887…	97308:45944:27:42274:463:43558:2001310:1900617:1900805:42254:19748:43066:8295:6450:9847:44182:31929:1900557:71470:1900772:32543:6307:30490:6525:2183:19184:9267:30488:2181:6412:70989:6407:36170:448:9405:16236:51083:288:6413:723:2000678:6099:6449:44416:2000679:447:2182:462:55114:71216:42149:6310:31505:71455:56:1900781:54:469:1900809:36180:6414:28:36146:6452:6364:43433:45903:461:6415:45860:18188:106…
460	maturation of 5.8S rRNA	25 out of 625 genes, 4.0%	48 out of 10340 background genes, 0.5%	1.62e-15	0	AN0237:AN0305:AN0421:AN0475:AN0776:AN10618:AN11773:AN1533:nsa2:nop58:AN3172:rrs1:AN4298:AN4471:AN5340:AN5441:AN5785:AN5789:AN6265:AN6556:AN6612:AN7107:AN7305:AN8247:AN9398	34473:55:27:463:71038:1905267:71040:71036:6461:71035:973:31054:34476:9267:282:71044:2181:6412:71042:42273:6407:36170:448:8298:34462:71039:447:71216:480:71051:467:70476:56:71037:71049:36180:34475:42255:466:16973:28:33621:461:472:35690
466	maturation of 5.8S rRNA from tricistronic rRNA transcript (SSU-rRNA, 5.8S rRNA, LSU-rRNA)	25 out of 625 genes, 4.0%	48 out of 10340 background genes, 0.5%	1.62e-15	0	AN0237:AN0305:AN0421:AN0475:AN0776:AN10618:AN11773:AN1533:nsa2:nop58:AN3172:rrs1:AN4298:AN4471:AN5340:AN5441:AN5785:AN5789:AN6265:AN6556:AN6612:AN7107:AN7305:AN8247:AN9398	34473:55:27:463:71038:1905267:71040:71036:6461:71035:973:31054:34476:9267:282:71044:2181:6412:71042:42273:6407:36170:448:8298:34462:71039:447:71216:480:71051:467:70476:56:71037:71049:36180:34475:42255:466:16973:28:33621:461:472:35690
42255	ribosome assembly	23 out of 625 genes, 3.7%	40 out of 10340 background genes, 0.4%	1.93e-15	0	AN0262:AN0421:AN10058:AN1013:rpf2:AN1166:AN11929:AN1200:AN2734:AN3172:spb4:rrs1:AN4232:AN4471:AN4475:AN4771:AN5222:AN5979:rpl3:AN6310:AN6632:AN6902:AN7305	55:27:463:30174:8361:1902626:30490:30702:9267:6267:2181:6412:747:42273:6407:36170:956:34462:447:462:71216:480:56:470:469:36180:6414:42255:466:28:6364:461:1900153:472:35690
71840	cellular component organization or biogenesis	136 out of 625 genes, 21.8%	1111 out of 10340 background genes, 10.7%	9.1e-14	0	AN0074:AN0092:rio2:AN0203:AN0237:AN0247:AN0262:AN0305:AN0421:AN0465:AN0475:AN0647:AN0695:AN0745:AN0776:AN0796:cdc20:AN0843:AN0946:AN10058:AN1013:AN10137:rpf2:AN10352:FKBP5:AN10614:AN10618:AN10712:AN10943:AN11062:cgrA:AN1166:AN11773:AN11929:AN1200:AN1223:AN1228:AN12408:hscA:AN1319:AN1345:bop1:AN1399:AN1533:AN1666:AN1711:AN1837:AN1949:AN2054:AN2292:mad2:easA:AN2734:AN2907:nsa2:AN3056:rmtB:AN3124:no…	398:43936:42243:34473:98783:916:97308:6270:45944:51312:46580:72480:55:27:42274:463:48315:43558:7004:90561:9272:70525:6338:722:1900805:40009:42254:11:1902440:71038:6468:30476:1905267:51056:30174:71040:19748:43066:44376:742:8361:8295:44774:30010:6450:1990942:71036:51754:6038:9847:31671:6461:71035:7019:7094:33316:1902626:44182:6334:2:6091:495:31929:90307:320:1900557:19919:32005:7023:1900772:973:3105…
447	endonucleolytic cleavage in ITS1 to separate SSU-rRNA from 5.8S rRNA and LSU-rRNA from tricistronic rRNA transcript (SSU-rRNA, 5.8S rRNA, LSU-rRNA)	18 out of 625 genes, 2.9%	28 out of 10340 background genes, 0.3%	6.19e-13	0	AN0305:AN0421:AN0475:AN10618:AN1533:nop58:AN3172:rrs1:AN4298:AN5340:AN5441:AN5785:AN5789:AN6265:AN6556:AN7107:AN7305:AN9398	55:1905267:6461:9267:282:2181:6412:42273:6407:36170:8298:34462:447:71216:480:70476:56:36180:42255:16973:28:461:472:35690
469	cleavage involved in rRNA processing	22 out of 625 genes, 3.5%	45 out of 10340 background genes, 0.4%	1.08e-12	0	AN0305:AN0421:AN0475:AN0776:AN10618:AN11773:AN1533:nop58:AN3172:rrs1:AN4298:AN5340:AN5441:AN5785:AN5789:AN6265:AN6556:AN6632:AN7107:AN7305:nop10:AN9398	34473:55:71038:1905267:71040:71036:6461:71035:973:31054:34476:30490:9267:282:71044:2181:6412:71042:42273:6407:36170:448:8298:34462:71039:447:71216:480:31120:71051:467:70476:56:31118:71037:71049:469:36180:34475:42255:16973:28:33621:461:1900153:472:35690
43603	cellular amide metabolic process	62 out of 625 genes, 9.9%	339 out of 10340 background genes, 3.3%	1.48e-12	0	AN0262:AN0433:AN0445:AN0465:spdA:AN0776:AN0843:AN0907:AN1013:AN10182:AN10416:AN10614:AN10681:AN1122:AN1166:AN12246:AN1228:hscA:AN1345:easA:easD:AN2734:AN2980:AN2997:AN3172:AN3411:AN3413:AN3894:rps16:AN4073:AN4087:rpl16a:AN4222:AN4475:AN4494:AN4594:ssz1:AN4794:AN4802:AN4803:AN5014:AN5222:AN5441:AN5719:AN5979:AN5997:AN6181:rpl3:AN6500:AN6563:AN6629:AN6632:AN6679:AN6698:aatB:AN7554:AN8066:trxB:AN887…	97308:45944:27:42274:463:43558:2001310:1900617:1900805:42254:19748:43066:8295:6450:9847:44182:31929:1900557:71470:1900772:32543:6307:30490:6525:2183:19184:9267:30488:2181:6412:70989:6407:36170:448:9405:16236:51083:288:6413:723:2000678:6099:6449:44416:2000679:447:2182:462:55114:71216:42149:6310:31505:71455:56:1900781:54:469:1900809:36180:6414:28:36146:6452:6364:43433:45903:461:6415:45860:18188:106…
479	endonucleolytic cleavage of tricistronic rRNA transcript (SSU-rRNA, 5.8S rRNA, LSU-rRNA)	19 out of 625 genes, 3.0%	34 out of 10340 background genes, 0.3%	3.86e-12	0	AN0305:AN0421:AN0475:AN0776:AN10618:AN1533:nop58:AN3172:rrs1:AN4298:AN5340:AN5441:AN5785:AN5789:AN6265:AN6556:AN7107:AN7305:AN9398	55:1905267:6461:9267:282:2181:6412:42273:6407:36170:448:8298:34462:447:71216:480:70476:56:36180:42255:16973:28:461:472:35690
22618	ribonucleoprotein complex assembly	26 out of 625 genes, 4.2%	68 out of 10340 background genes, 0.7%	4.47e-12	0	AN0262:AN0421:AN10058:AN1013:rpf2:AN1166:AN11929:AN1200:AN2734:AN3172:spb4:rrs1:AN4232:AN4471:AN4475:AN4560:AN4771:AN5222:AN5865:AN5979:rpl3:AN6310:AN6632:AN6902:AN7305:AN8491	55:27:463:30174:8361:1902626:30490:30702:9267:6267:2181:6412:747:42273:6407:36170:956:34462:447:462:71216:480:56:54:470:469:36180:6414:42255:466:28:6364:461:1900153:472:35690
478	endonucleolytic cleavage involved in rRNA processing	19 out of 625 genes, 3.0%	35 out of 10340 background genes, 0.3%	7.98e-12	0	AN0305:AN0421:AN0475:AN0776:AN10618:AN1533:nop58:AN3172:rrs1:AN4298:AN5340:AN5441:AN5785:AN5789:AN6265:AN6556:AN7107:AN7305:AN9398	55:1905267:6461:9267:282:2181:6412:42273:6407:36170:448:8298:34462:447:71216:480:70476:56:36180:42255:16973:28:461:472:35690
71826	ribonucleoprotein complex subunit organization	26 out of 625 genes, 4.2%	71 out of 10340 background genes, 0.7%	1.51e-11	0	AN0262:AN0421:AN10058:AN1013:rpf2:AN1166:AN11929:AN1200:AN2734:AN3172:spb4:rrs1:AN4232:AN4471:AN4475:AN4560:AN4771:AN5222:AN5865:AN5979:rpl3:AN6310:AN6632:AN6902:AN7305:AN8491	55:27:463:30174:8361:1902626:30490:30702:9267:6267:2181:6412:747:42273:6407:36170:956:34462:447:462:71216:480:56:54:470:469:36180:6414:42255:466:28:6364:461:1900153:472:35690
90502	RNA phosphodiester bond hydrolysis, endonucleolytic	19 out of 625 genes, 3.0%	36 out of 10340 background genes, 0.3%	1.59e-11	0	AN0305:AN0421:AN0475:AN0776:AN10618:AN1533:nop58:AN3172:rrs1:AN4298:AN5340:AN5441:AN5785:AN5789:AN6265:AN6556:AN7107:AN7305:AN9398	55:1905267:6461:9267:282:2181:6412:42273:6407:36170:448:8298:34462:447:71216:480:70476:56:36180:42255:16973:28:461:472:35690
44260	cellular macromolecule metabolic process	171 out of 625 genes, 27.4%	1643 out of 10340 background genes, 15.9%	3.09e-11	0	AN0074:AN0092:rio2:AN0141:AN0192:AN0237:AN0247:AN0262:AN0305:AN0312:AN0421:AN0433:AN0445:AN0465:AN0475:AN0647:AN0695:AN0745:AN0776:AN0796:AN0804:cdc20:AN0843:AN0905:AN0907:AN0956:AN1013:AN10182:AN10189:AN10352:AN10416:AN10433:FKBP5:AN10501:rmtA:AN10551:AN10614:AN10618:AN10681:AN10712:AN10832:AN10943:AN10970:AN11080:cgrA:AN11197:AN1122:AN1166:AN11773:AN11929:AN12246:AN1228:AN12419:hscA:AN1319:AN13…	398:43936:34473:98783:6363:916:15074:97308:70893:35837:6270:45944:72480:55:27:42274:463:48315:43558:7004:42797:9272:70525:70791:722:40009:42254:71038:6468:1905267:30174:71040:413:43066:5982:8361:8295:30010:60567:6450:71036:51754:6038:9847:31671:6461:71035:6360:7094:33316:1902626:44182:6334:495:43488:31929:19566:320:16567:71470:19919:70481:1900772:9253:32543:973:31054:957:70596:7076:34476:280:6307…
71428	rRNA-containing ribonucleoprotein complex export from nucleus	17 out of 625 genes, 2.7%	29 out of 10340 background genes, 0.3%	3.71e-11	0	AN0843:AN10618:AN10943:hscA:AN1666:AN1711:AN3172:AN3413:AN3706:rrs1:rps16:AN4087:AN5441:AN5789:AN5865:AN5997:AN6632	55:42274:463:6450:1902626:44182:30490:282:2181:6412:42273:6407:51083:44416:447:42149:480:70476:56:54:469:42255:28:6452:6364:45903:461:1900153:472:35690
90501	RNA phosphodiester bond hydrolysis	22 out of 625 genes, 3.5%	52 out of 10340 background genes, 0.5%	4.78e-11	0	AN0305:AN0421:AN0475:AN0776:AN10618:AN11773:AN1533:nop58:AN3172:rrs1:AN4298:AN5340:AN5441:AN5785:AN5789:AN6265:AN6556:AN6632:AN7107:AN7305:nop10:AN9398	34473:55:71038:1905267:71040:71036:6461:71035:973:31054:34476:30490:9267:282:71044:2181:6412:71042:42273:6407:36170:448:8298:34462:71039:447:71216:480:31120:71051:467:70476:56:31118:71037:71049:469:36180:34475:42255:16973:28:33621:461:1900153:472:35690
90304	nucleic acid metabolic process	110 out of 625 genes, 17.6%	900 out of 10340 background genes, 8.7%	1.74e-10	0	AN0074:AN0092:rio2:AN0141:AN0192:AN0237:AN0247:AN0305:AN0312:AN0421:AN0465:AN0475:AN0647:AN0695:AN0745:AN0776:AN0796:AN0804:AN0956:AN10352:AN10501:AN10551:AN10614:AN10618:AN10712:AN10832:AN10943:AN10970:cgrA:AN11197:AN11773:AN11929:AN1228:AN12419:hscA:AN1319:AN1345:bop1:AN1533:nosA:AN1949:rrp5:AN2153:AN2292:AN2415:AN2451:AN2747:nsa2:AN3048:AN3056:nop58:AN3172:spb4:AN3313:rrs1:AN3846:AN3944:AN4232…	398:34473:6363:15074:97308:70893:6270:45944:55:27:42274:463:48315:43558:7004:42797:70525:70791:722:42254:71038:6468:1905267:30174:71040:43066:8361:8295:30010:6450:71036:9847:6461:71035:6360:6334:1902626:44182:495:43488:31929:70481:973:31054:957:34476:280:6307:30490:6355:6351:6525:6366:30702:9267:30488:282:6267:6302:1990417:71044:2181:6412:1990481:6285:154:494:71042:70787:747:70989:42273:6407:3617…
27	ribosomal large subunit assembly	14 out of 625 genes, 2.2%	23 out of 10340 background genes, 0.2%	3.38e-09	0	AN0262:AN10058:AN1013:AN1166:AN1200:AN2734:spb4:AN4232:AN4471:AN4475:AN4771:rpl3:AN6310:AN6902	27:463:30174:8361:1902626:30702:9267:6267:2181:6412:747:36170:956:71216:470:36180:6414:466:6364:35690
90305	nucleic acid phosphodiester bond hydrolysis	22 out of 625 genes, 3.5%	63 out of 10340 background genes, 0.6%	4.95e-09	0	AN0305:AN0421:AN0475:AN0776:AN10618:AN11773:AN1533:nop58:AN3172:rrs1:AN4298:AN5340:AN5441:AN5785:AN5789:AN6265:AN6556:AN6632:AN7107:AN7305:nop10:AN9398	34473:55:71038:1905267:71040:71036:6461:71035:973:31054:34476:30490:9267:282:71044:2181:6412:71042:42273:6407:36170:448:8298:34462:71039:447:71216:480:31120:71051:467:70476:56:31118:71037:71049:469:36180:34475:42255:16973:28:33621:461:1900153:472:35690
470	maturation of LSU-rRNA	14 out of 625 genes, 2.2%	24 out of 10340 background genes, 0.2%	7.66e-09	0	AN0237:AN0776:AN10943:AN1228:AN1949:nsa2:spb4:AN4232:AN4471:AN5520:AN6374:AN6612:AN8247:AN8491	55:27:463:8361:1902626:1990417:2181:6412:747:448:462:470:466:35690
70925	organelle assembly	25 out of 625 genes, 4.0%	85 out of 10340 background genes, 0.8%	1.36e-08	0	AN0262:AN0421:AN10058:AN1013:rpf2:AN1166:AN11929:AN1200:AN2734:AN3172:spb4:rrs1:AN4232:AN4471:AN4475:kipB:AN4771:AN5222:AN5979:rpl3:AN6310:klpA:AN6632:AN6902:AN7305	55:27:463:90561:30174:742:8361:1990942:7019:1902626:90307:30490:30702:9267:6267:2181:6412:747:1902850:42273:6407:36170:956:35082:10938:31534:34462:51315:447:462:71216:30951:480:56:470:469:36180:6414:42255:31122:7018:466:28:6364:22:461:1900153:472:35690
43170	macromolecule metabolic process	176 out of 625 genes, 28.2%	1828 out of 10340 background genes, 17.7%	1.41e-08	0	AN0074:AN0092:rio2:AN0141:AN0192:AN0237:AN0247:AN0262:AN0305:AN0312:AN0421:AN0433:AN0445:AN0465:AN0475:AN0647:AN0695:AN0745:AN0776:AN0796:AN0804:cdc20:AN0843:AN0905:AN0907:AN0956:AN1013:AN10182:AN10189:AN10351:AN10352:AN10416:AN10433:FKBP5:AN10501:rmtA:AN10551:AN10614:AN10618:AN10681:AN10712:AN10832:AN10943:AN10970:AN11080:cgrA:AN11197:AN1122:AN1166:AN11773:AN11929:AN12246:AN1228:AN12419:hscA:AN1…	398:43936:34473:98783:6363:916:15074:97308:70893:35837:6270:45944:72480:55:27:42274:463:48315:43558:7004:42797:9272:70525:70791:722:40009:42254:71038:6468:1905267:30174:71040:413:43066:5982:8361:8295:30010:60567:6450:71036:51754:6038:9847:31671:6461:71035:6360:7094:33316:1902626:44182:6334:495:43488:31929:19566:320:16567:71470:19919:70481:1900772:9253:32543:973:31054:957:70596:7076:34476:280:6307…
34471	ncRNA 5'-end processing	11 out of 625 genes, 1.8%	15 out of 10340 background genes, 0.1%	3.59e-08	0	AN0305:AN0421:AN0475:AN10618:AN1533:nop58:AN4298:AN5785:AN6265:AN6556:AN7305	6461:9267:42273:36170:8298:34462:447:71216:480:56:36180:472:35690
472	endonucleolytic cleavage to generate mature 5'-end of SSU-rRNA from (SSU-rRNA, 5.8S rRNA, LSU-rRNA)	11 out of 625 genes, 1.8%	15 out of 10340 background genes, 0.1%	3.59e-08	0	AN0305:AN0421:AN0475:AN10618:AN1533:nop58:AN4298:AN5785:AN6265:AN6556:AN7305	6461:9267:42273:36170:8298:34462:447:71216:480:56:36180:472:35690
480	endonucleolytic cleavage in 5'-ETS of tricistronic rRNA transcript (SSU-rRNA, 5.8S rRNA, LSU-rRNA)	11 out of 625 genes, 1.8%	15 out of 10340 background genes, 0.1%	3.59e-08	0	AN0305:AN0421:AN0475:AN10618:AN1533:nop58:AN4298:AN5340:AN6265:AN6556:AN7305	9267:42273:36170:8298:34462:447:71216:480:56:36180:472:35690
966	RNA 5'-end processing	11 out of 625 genes, 1.8%	15 out of 10340 background genes, 0.1%	3.59e-08	0	AN0305:AN0421:AN0475:AN10618:AN1533:nop58:AN4298:AN5785:AN6265:AN6556:AN7305	6461:9267:42273:36170:8298:34462:447:71216:480:56:36180:472:35690
967	rRNA 5'-end processing	11 out of 625 genes, 1.8%	15 out of 10340 background genes, 0.1%	3.59e-08	0	AN0305:AN0421:AN0475:AN10618:AN1533:nop58:AN4298:AN5785:AN6265:AN6556:AN7305	6461:9267:42273:36170:8298:34462:447:71216:480:56:36180:472:35690
6403	RNA localization	21 out of 625 genes, 3.4%	63 out of 10340 background genes, 0.6%	4.19e-08	0	AN0843:rmtA:AN10618:AN10943:AN11773:hscA:AN1666:AN1711:AN3172:AN3413:AN3706:rrs1:rps16:AN4087:AN5441:AN5789:AN5865:AN5997:AN6556:AN6632:AN9398	34473:55:42274:463:71038:71040:60567:6450:71036:71035:1902626:44182:973:31054:34476:30490:9267:282:2181:71044:18195:6412:71042:42273:6407:36170:35246:51083:32968:8298:44416:71039:447:71216:42149:480:71051:467:70476:56:71037:54:71049:36180:469:34475:6406:42255:16973:28:33621:6452:6364:45903:461:1900153:472:35690
6611	protein export from nucleus	20 out of 625 genes, 3.2%	58 out of 10340 background genes, 0.6%	6.03e-08	0	AN0843:rmtA:AN10618:AN10943:hscA:AN1666:AN1711:AN3172:AN3413:AN3706:rrs1:rps16:AN4087:AN5441:AN5789:AN5865:AN5997:cse1:AN6632:AN9398	55:42274:463:60567:6450:1902626:44182:30490:6611:9267:282:2181:18195:6412:42273:6407:36170:35246:51083:32968:44416:447:71216:42149:480:70476:56:54:36180:469:6406:42255:16973:28:6452:6364:45903:461:1900153:472:35690
6139	nucleobase-containing compound metabolic process	122 out of 625 genes, 19.5%	1140 out of 10340 background genes, 11.0%	7.36e-08	0	AN0074:AN0092:rio2:AN0141:AN0192:AN0237:AN0247:AN0305:AN0312:AN0421:AN0465:AN0475:AN0490:AN0593:AN0647:AN0695:AN0745:AN0776:AN0796:AN0804:AN0956:pyrD:AN10352:AN10501:AN10551:AN10614:AN10618:AN10712:AN10832:AN10837:AN10943:AN10970:cgrA:AN11197:AN11773:AN11929:AN1228:AN12419:hscA:AN1319:AN1345:bop1:AN1533:AN1806:nosA:AN1949:rrp5:AN2153:AN2292:AN2415:AN2451:AN2747:nsa2:AN3048:AN3056:nop58:AN3172:spb…	398:34473:6363:9116:15074:1901907:97308:70893:6270:45944:55:27:42274:463:48315:43558:7004:42797:70525:70791:722:19280:42254:71038:6468:1905267:30174:71040:9113:43066:6555:8361:8295:30010:6450:71036:9847:6461:71035:6360:6334:1902626:44182:46855:495:43488:31929:70481:973:31054:957:34476:280:6307:30490:6355:6351:6525:6366:30702:1901911:9267:32263:44030:30488:282:6267:6302:1990417:71044:2181:46132:64…
51168	nuclear export	20 out of 625 genes, 3.2%	59 out of 10340 background genes, 0.6%	8.61e-08	0	AN0843:rmtA:AN10618:AN10943:hscA:AN1666:AN1711:AN3172:AN3413:AN3706:rrs1:rps16:AN4087:AN5441:AN5789:AN5865:AN5997:cse1:AN6632:AN9398	55:42274:463:60567:6450:1902626:44182:30490:6611:9267:282:2181:18195:6412:42273:6407:36170:35246:51083:32968:44416:447:71216:42149:480:70476:56:54:36180:469:6406:42255:16973:28:6452:6364:45903:461:1900153:472:35690
71166	ribonucleoprotein complex localization	19 out of 625 genes, 3.0%	56 out of 10340 background genes, 0.5%	2.5e-07	0	AN0843:rmtA:AN10618:AN10943:hscA:AN1666:AN1711:AN3172:AN3413:AN3706:rrs1:rps16:AN4087:AN5441:AN5789:AN5865:AN5997:AN6632:AN9398	55:42274:463:60567:6450:1902626:44182:30490:9267:282:2181:18195:6412:42273:6407:36170:35246:51083:32968:44416:447:71216:42149:480:70476:56:54:36180:469:6406:42255:16973:28:6452:6364:45903:461:1900153:472:35690
71426	ribonucleoprotein complex export from nucleus	19 out of 625 genes, 3.0%	56 out of 10340 background genes, 0.5%	2.5e-07	0	AN0843:rmtA:AN10618:AN10943:hscA:AN1666:AN1711:AN3172:AN3413:AN3706:rrs1:rps16:AN4087:AN5441:AN5789:AN5865:AN5997:AN6632:AN9398	55:42274:463:60567:6450:1902626:44182:30490:9267:282:2181:18195:6412:42273:6407:36170:35246:51083:32968:44416:447:71216:42149:480:70476:56:54:36180:469:6406:42255:16973:28:6452:6364:45903:461:1900153:472:35690
463	maturation of LSU-rRNA from tricistronic rRNA transcript (SSU-rRNA, 5.8S rRNA, LSU-rRNA)	12 out of 625 genes, 1.9%	21 out of 10340 background genes, 0.2%	3.47e-07	0	AN0237:AN0776:AN10943:AN1228:AN1949:nsa2:AN4232:AN4471:AN6374:AN6612:AN8247:AN8491	55:27:463:8361:1902626:1990417:2181:6412:747:448:462:466:35690
6405	RNA export from nucleus	19 out of 625 genes, 3.0%	57 out of 10340 background genes, 0.6%	3.55e-07	0	AN0843:rmtA:AN10618:AN10943:hscA:AN1666:AN1711:AN3172:AN3413:AN3706:rrs1:rps16:AN4087:AN5441:AN5789:AN5865:AN5997:AN6632:AN9398	55:42274:463:60567:6450:1902626:44182:30490:9267:282:2181:18195:6412:42273:6407:36170:35246:51083:32968:44416:447:71216:42149:480:70476:56:54:36180:469:6406:42255:16973:28:6452:6364:45903:461:1900153:472:35690
46483	heterocycle metabolic process	136 out of 625 genes, 21.8%	1352 out of 10340 background genes, 13.1%	3.61e-07	0	AN0074:AN0092:rio2:AN0141:mdpC:mdpG:AN0192:AN0237:AN0247:AN0305:AN0312:AN0421:AN0465:AN0475:AN0490:AN0501:AN0593:AN0647:AN0695:AN0745:AN0776:AN0796:AN0804:AN0956:brlA:mdpB:pyrD:AN10352:AN10501:AN10551:AN10614:AN10618:AN10712:AN10832:AN10837:AN10943:AN10970:AN11080:AN11111:cgrA:AN11197:AN11773:AN11929:AN1228:AN12419:hscA:AN1319:AN1345:bop1:AN1533:AN1806:nosA:AN1949:rrp5:AN2153:AN2292:AN2415:AN2451…	398:34473:43936:6363:9116:15074:1901907:43941:97308:70893:44550:35837:6270:45944:1900602:55:27:42274:463:48315:55085:43558:2001310:7004:42797:1900617:70525:70791:722:1900805:19280:42254:71038:6468:1905267:45461:30174:71040:9113:43066:19748:6555:8361:8295:30010:6450:71036:43945:42594:9847:6461:71035:1900584:6360:43944:6334:1902626:44182:46855:495:43488:31929:1516:1900557:19919:70481:1900772:973:31…
51029	rRNA transport	9 out of 625 genes, 1.4%	11 out of 10340 background genes, 0.1%	4.57e-07	0	AN0843:AN3172:AN3413:AN3706:rps16:AN4087:AN5441:AN5997:AN6632	42274:30490:2181:6412:6407:447:56:469:28:45903:461:1900153
6407	rRNA export from nucleus	9 out of 625 genes, 1.4%	11 out of 10340 background genes, 0.1%	4.57e-07	0	AN0843:AN3172:AN3413:AN3706:rps16:AN4087:AN5441:AN5997:AN6632	42274:30490:2181:6412:6407:447:56:469:28:45903:461:1900153
50658	RNA transport	19 out of 625 genes, 3.0%	59 out of 10340 background genes, 0.6%	6.95e-07	0	AN0843:rmtA:AN10618:AN10943:hscA:AN1666:AN1711:AN3172:AN3413:AN3706:rrs1:rps16:AN4087:AN5441:AN5789:AN5865:AN5997:AN6632:AN9398	55:42274:463:60567:6450:1902626:44182:30490:9267:282:2181:18195:6412:42273:6407:36170:35246:51083:32968:44416:447:71216:42149:480:70476:56:54:36180:469:6406:42255:16973:28:6452:6364:45903:461:1900153:472:35690
51236	establishment of RNA localization	19 out of 625 genes, 3.0%	59 out of 10340 background genes, 0.6%	6.95e-07	0	AN0843:rmtA:AN10618:AN10943:hscA:AN1666:AN1711:AN3172:AN3413:AN3706:rrs1:rps16:AN4087:AN5441:AN5789:AN5865:AN5997:AN6632:AN9398	55:42274:463:60567:6450:1902626:44182:30490:9267:282:2181:18195:6412:42273:6407:36170:35246:51083:32968:44416:447:71216:42149:480:70476:56:54:36180:469:6406:42255:16973:28:6452:6364:45903:461:1900153:472:35690
50657	nucleic acid transport	19 out of 625 genes, 3.0%	60 out of 10340 background genes, 0.6%	9.6e-07	0	AN0843:rmtA:AN10618:AN10943:hscA:AN1666:AN1711:AN3172:AN3413:AN3706:rrs1:rps16:AN4087:AN5441:AN5789:AN5865:AN5997:AN6632:AN9398	55:42274:463:60567:6450:1902626:44182:30490:9267:282:2181:18195:6412:42273:6407:36170:35246:51083:32968:44416:447:71216:42149:480:70476:56:54:36180:469:6406:42255:16973:28:6452:6364:45903:461:1900153:472:35690
1901360	organic cyclic compound metabolic process	144 out of 625 genes, 23.0%	1491 out of 10340 background genes, 14.4%	1.67e-06	0	AN0074:AN0092:rio2:AN0141:mdpC:mdpG:AN0192:ivoB:AN0237:AN0247:AN0305:AN0312:CYP680A1:AN0421:AN0465:AN0475:AN0490:AN0501:AN0593:AN0647:AN0695:AN0745:AN0776:AN0796:AN0804:AN0851:AN0956:brlA:mdpB:pyrD:AN10352:AN10501:AN10551:AN10614:AN10618:AN10648:AN10712:AN10832:AN10837:AN10943:AN10970:AN11080:AN11111:cgrA:AN11197:AN11773:AN11929:AN1228:AN12419:hscA:AN1319:AN1345:bop1:AN1533:AN1806:nosA:AN1949:rrp…	398:34473:43936:6363:9116:15074:1901907:43941:97308:70893:44550:35837:6270:45944:1900602:55:27:6084:42274:463:48315:55085:43558:2001310:7004:42797:9272:1900617:70525:70791:722:1900805:19280:42254:71038:6468:1905267:45461:30174:71040:9113:43066:19748:6555:8361:8295:30010:6450:71036:43945:42594:9847:31671:6461:71035:1900584:6360:43944:6334:1902626:44182:46855:495:43488:31929:1516:1900557:19919:7048…
6725	cellular aromatic compound metabolic process	133 out of 625 genes, 21.3%	1344 out of 10340 background genes, 13.0%	1.78e-06	0	AN0074:AN0092:rio2:AN0141:mdpC:mdpG:AN0192:ivoB:AN0237:AN0247:AN0305:AN0312:AN0421:AN0465:AN0475:AN0490:AN0593:AN0647:AN0695:AN0745:AN0776:AN0796:AN0804:AN0956:brlA:mdpB:pyrD:AN10352:AN10501:AN10551:AN10614:AN10618:AN10712:AN10832:AN10837:AN10943:AN10970:AN11111:cgrA:AN11197:AN11773:AN11929:AN1228:AN12419:hscA:AN1319:AN1345:bop1:AN1533:AN1806:nosA:AN1949:rrp5:AN2153:AN2292:AN2415:AN2451:easA:AN27…	398:34473:43936:6363:9116:15074:1901907:43941:97308:70893:44550:6270:45944:1900602:55:27:42274:463:48315:43558:7004:42797:9272:70525:70791:722:1900805:19280:42254:71038:6468:1905267:45461:30174:71040:9113:43066:19748:6555:8361:8295:30010:6450:71036:43945:42594:9847:31671:6461:71035:1900584:6360:43944:6334:1902626:44182:46855:495:43488:31929:1516:1900557:19919:70481:1900772:973:31054:957:70596:344…
44271	cellular nitrogen compound biosynthetic process	92 out of 625 genes, 14.7%	816 out of 10340 background genes, 7.9%	1.79e-06	0	AN0192:AN0262:AN0312:AN0433:AN0445:AN0465:AN0490:AN0501:spdA:AN0776:AN0843:AN0907:brlA:AN1013:pyrD:AN10182:AN10416:AN10501:AN10614:AN10681:AN10837:AN10970:AN11080:AN11111:AN11197:AN1122:AN1166:AN12246:AN1228:AN12419:hscA:AN1345:nosA:AN2415:easA:easD:AN2734:AN2747:AN2980:AN2997:AN3172:AN3411:AN3413:AN3846:AN3894:AN3944:rps16:AN4073:AN4087:rpl16a:AN4222:metH:AN4475:AN4494:AN4594:ssz1:AN4774:AN4794:…	43936:6363:9116:70893:97308:35837:45944:27:42274:463:48315:55085:6567:43558:2001310:7004:42797:1900617:70791:1900805:19280:42254:6520:45461:19748:9113:43066:45329:6555:8295:6450:43945:42594:9847:6360:44182:31929:1900557:71470:1900772:32543:280:6307:30490:6355:6351:6525:6366:2183:19184:9267:32263:44030:30488:9821:2181:46132:6412:32265:6285:46083:70787:9228:70989:48023:6407:36170:448:9405:16236:510…
6807	nitrogen compound metabolic process	200 out of 625 genes, 32.0%	2324 out of 10340 background genes, 22.5%	8.78e-06	0	AN0074:AN0092:rio2:AN0141:AN0192:AN0237:AN0247:AN0262:AN0305:AN0312:AN0421:AN0433:AN0445:AN0465:AN0475:AN0490:AN0501:AN0593:AN0647:spdA:AN0695:AN0745:AN0776:AN0796:AN0804:cdc20:AN0843:AN0905:AN0907:AN0956:brlA:AN1013:pyrD:AN10182:AN10189:AN10351:AN10352:AN10416:AN10433:FKBP5:AN10501:rmtA:AN10551:AN10614:AN10618:AN10681:AN10712:AN10832:AN10837:AN10943:AN10970:AN11080:AN11111:cgrA:AN11197:AN1122:AN…	1901907:70893:45944:72480:55:463:48315:55085:6567:43558:7004:1900617:70525:70791:722:19280:42254:45461:30174:71040:9113:43066:6553:45329:8361:8295:51754:6038:1902626:44182:6334:495:31929:320:71470:70481:31054:957:34476:280:6307:6351:6366:30702:2183:1901911:19184:412:6267:9821:6302:90529:1990417:32265:154:71042:6098:747:48023:34613:6508:9405:35246:51083:46100:288:70966:723:6015:2000678:34462:44416…
1901566	organonitrogen compound biosynthetic process	80 out of 625 genes, 12.8%	696 out of 10340 background genes, 6.7%	9.92e-06	0	AN0262:AN0433:AN0445:AN0465:AN0490:AN0501:spdA:AN0776:AN0843:AN0907:brlA:AN1013:pyrD:AN10182:AN10416:AN10614:AN10681:AN10837:AN11080:AN11111:AN1122:AN1166:AN12246:AN1228:hscA:AN1345:easA:easD:AN2734:AN2980:AN2997:AN3172:AN3411:AN3413:AN3593:AN3846:AN3894:rps16:AN4073:AN4087:rpl16a:AN4222:AN4290:metH:AN4475:AN4494:AN4594:ssz1:AN4774:AN4794:AN4802:AN4803:AN5014:AN5222:AN5441:AN5719:pyrF:AN5979:AN59…	45944:463:48315:55085:6567:43558:1900617:19280:42254:45461:9113:43066:6553:45329:8295:6038:44182:31929:71470:280:6307:2183:19184:9821:90529:32265:48023:9405:51083:46100:288:723:2000678:44416:2000679:19878:447:2182:43173:42149:905:6031:10913:71455:6221:70317:1900781:1900809:18342:6414:42438:46084:6139:19354:75307:6452:45903:6415:18188:10620:1900153:6357:43936:9116:916:97308:35837:27:42274:2001310:…
9451	RNA modification	19 out of 625 genes, 3.0%	72 out of 10340 background genes, 0.7%	2.78e-05	0	AN0141:AN0247:AN0695:AN0745:AN0804:AN0956:AN10551:AN10712:AN10832:AN2451:AN3313:AN5789:AN5871:kaeA:AN6604:AN8066:nop10:swoC:trm1	45944:48315:70525:722:42254:495:6302:154:447:6547:70476:6400:70317:31118:2940:6357:30010:30488:282:1990481:494:42273:6413:32447:31167:462:55114:31120:56:51211:469:1904812:8033:2098:1990258:6897
2181	cytoplasmic translation	14 out of 625 genes, 2.2%	41 out of 10340 background genes, 0.4%	5.26e-05	0	AN0445:AN0776:AN10182:AN10681:AN1166:hscA:AN2734:AN2980:AN2997:AN3172:ssz1:AN5719:AN6563:AN9465	45944:42254:44182:71470:2183:51083:44416:447:2182:42149:6414:6452:97308:27:6450:9267:2181:6407:36170:448:16236:6449:71216:54:36180:28:6364:461:45860:35690
6913	nucleocytoplasmic transport	21 out of 625 genes, 3.4%	91 out of 10340 background genes, 0.9%	6.73e-05	0	AN0843:rmtA:AN10618:AN10943:AN1223:hscA:AN1666:AN1711:AN3172:AN3413:AN3706:rrs1:rps16:AN4087:AN5441:AN5789:AN5865:AN5997:cse1:AN6632:AN9398	55:463:1902626:44182:6611:35246:51083:44416:447:42149:480:70476:6452:45903:1900153:472:7064:42274:44376:60567:6450:30490:9267:282:2181:18195:6412:42273:6407:36170:32968:71216:1990022:56:54:36180:469:6406:42255:16973:28:6364:461:35690
51169	nuclear transport	21 out of 625 genes, 3.4%	92 out of 10340 background genes, 0.9%	8.24e-05	0	AN0843:rmtA:AN10618:AN10943:AN1223:hscA:AN1666:AN1711:AN3172:AN3413:AN3706:rrs1:rps16:AN4087:AN5441:AN5789:AN5865:AN5997:cse1:AN6632:AN9398	55:463:1902626:44182:6611:35246:51083:44416:447:42149:480:70476:6452:45903:1900153:472:7064:42274:44376:60567:6450:30490:9267:282:2181:18195:6412:42273:6407:36170:32968:71216:1990022:56:54:36180:469:6406:42255:16973:28:6364:461:35690
33750	ribosome localization	10 out of 625 genes, 1.6%	21 out of 10340 background genes, 0.2%	0.0001	0	AN10618:AN10943:hscA:AN1666:AN1711:rrs1:AN4087:AN5789:AN5865:AN6632	55:463:1902626:44182:51083:44416:447:42149:480:70476:6452:1900153:472:6450:30490:282:2181:6412:42273:6407:56:54:469:42255:28:6364:35690
33753	establishment of ribosome localization	10 out of 625 genes, 1.6%	21 out of 10340 background genes, 0.2%	0.0001	0	AN10618:AN10943:hscA:AN1666:AN1711:rrs1:AN4087:AN5789:AN5865:AN6632	55:463:1902626:44182:51083:44416:447:42149:480:70476:6452:1900153:472:6450:30490:282:2181:6412:42273:6407:56:54:469:42255:28:6364:35690
54	ribosomal subunit export from nucleus	10 out of 625 genes, 1.6%	21 out of 10340 background genes, 0.2%	0.0001	0	AN10618:AN10943:hscA:AN1666:AN1711:rrs1:AN4087:AN5789:AN5865:AN6632	55:463:1902626:44182:51083:44416:447:42149:480:70476:6452:1900153:472:6450:30490:282:2181:6412:42273:6407:56:54:469:42255:28:6364:35690
34645	cellular macromolecule biosynthetic process	78 out of 625 genes, 12.5%	716 out of 10340 background genes, 6.9%	0.00015	0	AN0192:AN0262:AN0312:AN0433:AN0445:AN0465:AN0776:AN0843:AN0907:AN1013:AN10182:AN10416:AN10501:AN10614:AN10681:AN10970:AN11197:AN1122:AN1166:AN12246:AN1228:AN12419:hscA:AN1345:nosA:AN2314:AN2415:AN2734:AN2747:AN2980:AN2997:AN3172:AN3411:AN3413:AN3846:AN3894:AN3944:rps16:AN4073:AN4087:rpl16a:AN4222:AN4475:AN4494:AN4594:ssz1:AN4771:AN4794:AN4802:AN4803:AN5014:AN5222:AN5441:AN5719:agsA:AN5979:AN5997:…	70893:45944:463:48315:43558:7004:9272:70791:42254:30174:43066:5982:8295:6038:44182:31929:71470:70596:280:6307:6351:6366:30702:2183:6267:90529:9405:51083:288:723:2000678:44416:2000679:447:2182:5978:42752:42149:70987:6031:71455:30437:768:6414:6452:122:45903:6415:18188:10620:1900153:42790:43936:6363:916:97308:6270:27:42274:42797:6450:9847:31671:6360:32543:30490:6355:6525:9267:30488:2181:6412:6285:70…
9059	macromolecule biosynthetic process	78 out of 625 genes, 12.5%	729 out of 10340 background genes, 7.1%	0.00032	0	AN0192:AN0262:AN0312:AN0433:AN0445:AN0465:AN0776:AN0843:AN0907:AN1013:AN10182:AN10416:AN10501:AN10614:AN10681:AN10970:AN11197:AN1122:AN1166:AN12246:AN1228:AN12419:hscA:AN1345:nosA:AN2314:AN2415:AN2734:AN2747:AN2980:AN2997:AN3172:AN3411:AN3413:AN3846:AN3894:AN3944:rps16:AN4073:AN4087:rpl16a:AN4222:AN4475:AN4494:AN4594:ssz1:AN4771:AN4794:AN4802:AN4803:AN5014:AN5222:AN5441:AN5719:agsA:AN5979:AN5997:…	70893:45944:463:48315:43558:7004:9272:70791:42254:30174:43066:5982:8295:6038:44182:31929:71470:70596:280:6307:6351:6366:30702:2183:6267:90529:9405:51083:288:723:2000678:44416:2000679:447:2182:5978:42752:42149:70987:6031:71455:30437:768:6414:6452:122:45903:6415:18188:10620:1900153:42790:43936:6363:916:97308:6270:27:42274:42797:6450:9847:31671:6360:32543:30490:6355:6525:9267:30488:2181:6412:6285:70…
154	rRNA modification	8 out of 625 genes, 1.3%	14 out of 10340 background genes, 0.1%	0.00033	0	AN0247:AN0695:AN0745:AN3313:AN5789:AN5871:nop10:swoC	48315:495:154:447:6547:70476:70317:31118:30010:282:1990481:494:42273:31167:462:31120:56:51211:469:1904812:8033:1990258:6897
28	ribosomal small subunit assembly	7 out of 625 genes, 1.1%	11 out of 10340 background genes, 0.1%	0.00069	0	AN0421:AN11929:AN3172:AN5222:AN5979:AN6632:AN7305	34462:447:480:1900153:472:30490:2181:6412:6407:462:56:469:28:6364:461
15931	nucleobase-containing compound transport	19 out of 625 genes, 3.0%	89 out of 10340 background genes, 0.9%	0.00101	0	AN0843:rmtA:AN10618:AN10943:hscA:AN1666:AN1711:AN3172:AN3413:AN3706:rrs1:rps16:AN4087:AN5441:AN5789:AN5865:AN5997:AN6632:AN9398	55:463:1902626:44182:35246:51083:44416:447:42149:480:70476:6452:45903:1900153:472:42274:60567:6450:30490:9267:282:2181:18195:6412:42273:6407:36170:32968:71216:56:54:36180:469:6406:42255:16973:28:6364:461:35690
6450	regulation of translational fidelity	6 out of 625 genes, 1.0%	8 out of 10340 background genes, 0.1%	0.00109	0	AN10681:hscA:AN1345:AN3413:ssz1:AN4803	44182:51083:44416:42149:6452:45903:97308:6450:2181:6412:6407:462:54:6364
44238	primary metabolic process	219 out of 625 genes, 35.0%	2759 out of 10340 background genes, 26.7%	0.00115	0	AN0074:AN0092:rio2:AN0141:mdpG:AN0192:AN0237:AN0247:AN0262:AN0305:AN0312:CYP680A1:AN0421:AN0433:AN0445:AN0465:AN0475:AN0490:AN0593:AN0647:spdA:AN0695:AN0745:AN0776:AN0796:AN0804:cdc20:AN0843:AN0851:AN0905:AN0907:AN0956:AN1013:pyrD:AN10182:AN10189:AN10351:AN10352:AN10416:AN10433:FKBP5:AN10501:rmtA:AN10551:AN10614:AN10618:AN10648:AN10681:AN10712:AN10832:AN10837:AN10943:AN10970:AN11080:cgrA:AN11197:…	6490:1901907:70893:44237:45944:72480:55:463:48315:6567:43558:7004:9272:1900617:70525:70791:722:19280:42254:45461:30174:71040:9113:43066:5982:6553:45329:8361:8295:51754:6038:16052:1902626:44182:6334:6071:495:31929:320:71470:70481:31054:957:70596:34476:280:6307:6351:6366:30702:2183:1901911:19184:412:6267:6302:90529:1990417:32265:154:23:71042:6098:747:8202:34613:6508:35246:9405:6012:51083:46100:4393…
6360	transcription from RNA polymerase I promoter	8 out of 625 genes, 1.3%	18 out of 10340 background genes, 0.2%	0.00395	0	AN0192:AN0312:AN10501:AN10970:AN2415:AN2747:AN3944:AN6558	70893:45944:6366:122:42790:6363:42797:6360:42493
44237	cellular metabolic process	219 out of 625 genes, 35.0%	2829 out of 10340 background genes, 27.4%	0.00776	0	AN0074:AN0092:rio2:AN0141:mdpC:mdpG:AN0192:ivoB:AN0237:AN0247:AN0262:AN0305:AN0312:AN0421:AN0433:AN0445:AN0465:AN0475:AN0490:AN0501:AN0593:AN0647:spdA:AN0695:AN0745:AN0776:AN0796:AN0804:cdc20:AN0843:AN0905:AN0907:AN0956:brlA:mdpB:AN1013:pyrD:AN10182:AN10189:AN10352:AN10416:AN10433:FKBP5:AN10501:rmtA:AN10551:AN10614:AN10618:AN10648:AN10681:AN10712:AN10832:AN10837:AN10943:AN10970:AN11080:AN11111:cg…	6490:1901907:70893:44237:45944:72480:55:463:48315:55085:6567:43558:7004:9272:1900617:70525:70791:722:19280:42254:45461:30174:71040:9113:43066:5982:6553:45329:8361:8295:51754:6038:1902626:44182:6334:6091:6071:495:31929:320:71470:71451:70481:31054:957:70596:34476:280:6307:6351:6366:30702:2183:1901911:19184:412:6267:9821:6302:90529:1990417:32265:154:23:71042:6098:747:48023:34613:6508:35246:9405:6012…
18216	peptidyl-arginine methylation	4 out of 625 genes, 0.6%	4 out of 10340 background genes, 0.0%	0.01205	0	AN10189:rmtA:rmtB:AN6072	42254:6508:35246:6547:60567:19919:18195:32968:6406:18216
44267	cellular protein metabolic process	76 out of 625 genes, 12.2%	788 out of 10340 background genes, 7.6%	0.02242	0.0002	rio2:AN0262:AN0433:AN0445:AN0465:AN0745:AN0776:cdc20:AN0843:AN0905:AN0907:AN1013:AN10182:AN10189:AN10416:AN10433:FKBP5:rmtA:AN10614:AN10681:AN10832:AN11080:AN1122:AN1166:AN12246:AN1228:hscA:AN1345:AN1445:AN1904:AN2054:AN2734:AN2980:AN2997:rmtB:AN3172:AN3411:AN3413:AN3894:sldA:rps16:AN4073:AN4087:ffkF:rpl16a:AN4222:AN4475:AN4494:AN4594:ssz1:AN4794:AN4802:AN4803:AN5014:AN5222:AN5441:AN5719:AN5815:A…	45944:72480:463:43558:42254:43066:51754:44182:6334:31929:320:71470:6307:2183:412:34613:6508:35246:51083:288:723:2000678:44416:30433:51315:2000679:447:2182:415:6547:42149:34501:71455:6457:18342:44267:6414:6452:2000775:281:45903:6415:72370:18188:10620:1900153:6357:98783:97308:35837:27:42274:40009:6468:413:60567:6450:7094:33316:16567:19919:1900772:32543:7076:30490:2000751:9267:30488:2181:18195:6412:…
34622	cellular macromolecular complex assembly	32 out of 625 genes, 5.1%	243 out of 10340 background genes, 2.4%	0.02253	0.0002	AN0262:AN0421:AN10058:AN1013:rpf2:FKBP5:AN1166:AN11929:AN1200:AN2734:AN2907:AN3172:spb4:rrs1:AN4232:AN4471:AN4475:AN4560:AN4771:AN5222:AN5703:AN5865:AN5979:AN6176:rpl3:AN6310:AN6632:AN6902:AN7260:AN7305:napB:AN8491	55:463:30174:8361:1902626:6334:6091:7023:30702:412:6267:747:34613:70196:32436:34462:35066:447:415:7021:6303:480:30437:6457:6414:1900153:472:6270:27:40009:30490:9267:2181:6412:42273:6407:36170:956:462:55114:71216:56:54:32981:470:469:36180:42255:466:28:6364:461:42493:35690
9987	cellular process	269 out of 625 genes, 43.0%	3658 out of 10340 background genes, 35.4%	0.0242	0.0002	tmpA:AN0074:AN0092:rio2:AN0141:mdpC:mdpG:AN0192:AN0203:ivoB:AN0237:AN0247:AN0262:AN0305:AN0312:AN0421:AN0433:AN0445:AN0465:AN0475:AN0490:AN0501:AN0593:tcpA:AN0647:spdA:AN0695:AN0745:AN0776:AN0796:AN0804:cdc20:AN0843:AN0905:AN0907:AN0946:AN0956:brlA:mdpB:AN10058:AN1013:pyrD:AN10137:AN10182:AN10189:rpf2:AN10223:AN10350:AN10351:AN10352:AN10416:AN10433:FKBP5:AN10501:rmtA:AN10551:AN10614:AN10618:AN106…	42243:6490:1901907:70893:44237:45944:51312:46580:72480:55:30447:463:55085:48315:6567:43558:7004:9272:1900617:70525:70791:722:75306:19280:42254:11:45461:30174:71040:9113:43066:742:5982:6553:51666:45329:8361:8295:44774:51754:43942:6038:43405:7019:1902626:44182:6334:6091:6071:495:31929:320:32995:71470:71451:70481:7023:31054:957:70596:34476:280:6307:34198:6351:6366:30702:2183:34599:1901911:19184:412:…
19538	protein metabolic process	82 out of 625 genes, 13.1%	885 out of 10340 background genes, 8.6%	0.0445	0.0005	rio2:AN0262:AN0433:AN0445:AN0465:AN0745:AN0776:cdc20:AN0843:AN0905:AN0907:AN1013:AN10182:AN10189:AN10351:AN10416:AN10433:FKBP5:rmtA:AN10614:AN10681:AN10832:AN11080:AN1122:AN1166:AN12246:AN1228:hscA:AN1345:AN1445:AN1904:AN2054:AN2237:AN2366:AN2734:AN2980:AN2997:rmtB:AN3172:AN3411:AN3413:AN3894:sldA:rps16:AN4073:AN4087:ffkF:rpl16a:AN4222:AN4475:AN4494:AN4594:ssz1:AN4794:AN4802:AN4803:AN5014:AN5055:…	45944:72480:463:43558:42254:43066:51754:44182:6334:31929:320:71470:6307:2183:412:34613:6508:35246:51083:288:723:2000678:44416:30433:51315:2000679:447:2182:415:6547:42149:34501:71455:6457:60309:18342:44267:6414:6956:6452:2000775:281:45903:6415:72370:18188:10620:1900153:6357:98783:97308:35837:27:42274:40009:6468:413:60567:6450:7094:33316:16567:19919:1900772:32543:7076:30490:2000751:9267:30488:2181:…
65003	macromolecular complex assembly	33 out of 625 genes, 5.3%	263 out of 10340 background genes, 2.5%	0.04535	0.0005	AN0262:AN0421:AN10058:AN1013:rpf2:FKBP5:AN1166:AN11929:AN1200:AN2734:AN2907:AN3172:spb4:rrs1:AN4232:AN4471:AN4475:AN4560:AN4771:AN5222:AN5703:AN5785:AN5865:AN5979:AN6176:rpl3:AN6310:AN6632:AN6902:AN7260:AN7305:napB:AN8491	55:463:30174:8361:1902626:6334:6091:7023:30702:412:6267:747:34613:70196:32436:34462:35066:447:415:7021:6303:480:30437:6457:6414:1900153:472:6270:27:40009:6461:30490:9267:2181:6412:42273:6407:36170:956:462:55114:71216:56:54:32981:470:469:36180:42255:466:28:6364:461:42493:35690
71704	organic substance metabolic process	231 out of 625 genes, 37.0%	3088 out of 10340 background genes, 29.9%	0.04642	0.0005	AN0074:AN0092:rio2:AN0141:mdpC:mdpG:AN0192:ivoB:AN0237:AN0247:AN0262:AN0305:AN0312:CYP680A1:AN0421:AN0433:AN0445:AN0465:AN0475:AN0490:AN0501:AN0593:AN0647:spdA:AN0695:AN0745:AN0776:AN0796:AN0804:cdc20:AN0843:AN0851:AN0905:AN0907:AN0956:brlA:mdpB:AN1013:pyrD:AN10182:AN10189:AN10351:AN10352:AN10416:AN10433:FKBP5:AN10501:rmtA:AN10551:AN10614:AN10618:AN10648:AN10681:AN10712:AN10832:AN10837:AN10943:AN…	6490:1901907:70893:44237:45944:72480:55:463:48315:55085:6567:43558:7004:9272:1900617:70525:70791:722:19280:42254:45461:30174:71040:9113:43066:5982:6553:45329:8361:8295:51754:6038:16052:1902626:44182:6334:6071:495:31929:320:71470:70481:31054:957:70596:34476:280:6307:6351:6366:30702:2183:1901911:19184:412:6267:9821:6302:90529:1990417:32265:154:23:71042:6098:747:8202:48023:34613:6508:35246:9405:6012…
2. FungiFun (https://elbe.hki-jena.de/fungifun/fungifun.php)
FunCat ID	FunCat description	FunCat main category	Gene ID(s)	Exact p-value	Adjusted p-value	# genes / category	# genes / input
12.01	ribosome biogenesis	Protein synthesis	ANIA_00074 | ANIA_00124 | ANIA_00262 | ANIA_00445 | ANIA_00465 | ANIA_00475 | ANIA_00583 | ANIA_00641 | ANIA_00647 | ANIA_00695 | ANIA_00776 | ANIA_00843 | ANIA_00844 | ANIA_00907 | ANIA_00946 | ANIA_01013 | ANIA_01122 | ANIA_01200 | ANIA_01228 | ANIA_01319 | ANIA_01345 | ANIA_01366 | ANIA_01367 | ANIA_01533 | ANIA_01666 | ANIA_01711 | ANIA_02120 | ANIA_02734 | ANIA_02926 | ANIA_02980 | ANIA_0317…	9.949e-70	3.4026e-67	97 / 173	97 / 638
12.01.01	ribosomal proteins	Protein synthesis	ANIA_00262 | ANIA_00421 | ANIA_00433 | ANIA_00445 | ANIA_00465 | ANIA_00583 | ANIA_00647 | ANIA_00745 | ANIA_00776 | ANIA_00843 | ANIA_00907 | ANIA_01013 | ANIA_01122 | ANIA_01166 | ANIA_01200 | ANIA_01228 | ANIA_01256 | ANIA_01345 | ANIA_01711 | ANIA_02147 | ANIA_02734 | ANIA_02980 | ANIA_03172 | ANIA_03176 | ANIA_03413 | ANIA_03706 | ANIA_04060 | ANIA_04073 | ANIA_04087 | ANIA_04202 | ANIA_0422…	1.1013e-39	1.8833e-37	70 / 163	70 / 638
11.04.01	rRNA processing	Transcription	ANIA_00074 | ANIA_00092 | ANIA_00124 | ANIA_00237 | ANIA_00305 | ANIA_00421 | ANIA_00475 | ANIA_00583 | ANIA_00589 | ANIA_00647 | ANIA_00695 | ANIA_00745 | ANIA_00796 | ANIA_01319 | ANIA_01367 | ANIA_01533 | ANIA_01949 | ANIA_02077 | ANIA_02147 | ANIA_02292 | ANIA_02734 | ANIA_02932 | ANIA_03167 | ANIA_03176 | ANIA_03313 | ANIA_03745 | ANIA_03794 | ANIA_03827 | ANIA_03938 | ANIA_04233 | ANIA_0429…	6.1405e-39	7.0002e-37	73 / 182	73 / 638
12.04	translation	Protein synthesis	ANIA_00262 | ANIA_00421 | ANIA_00445 | ANIA_00465 | ANIA_00776 | ANIA_00843 | ANIA_01013 | ANIA_01122 | ANIA_01166 | ANIA_01228 | ANIA_01345 | ANIA_01408 | ANIA_02734 | ANIA_02932 | ANIA_02980 | ANIA_02989 | ANIA_02997 | ANIA_03055 | ANIA_03172 | ANIA_03411 | ANIA_03413 | ANIA_03706 | ANIA_04060 | ANIA_04073 | ANIA_04087 | ANIA_04163 | ANIA_04202 | ANIA_04222 | ANIA_04290 | ANIA_04475 | ANIA_0449…	4.7758e-26	4.0833e-24	58 / 173	58 / 638
16.03.03	RNA binding	Protein with binding function or cofactor requirement (structural or analytic)	ANIA_00262 | ANIA_00305 | ANIA_00310 | ANIA_00421 | ANIA_00445 | ANIA_00475 | ANIA_00583 | ANIA_00647 | ANIA_00695 | ANIA_00745 | ANIA_00776 | ANIA_00796 | ANIA_01013 | ANIA_01166 | ANIA_01452 | ANIA_01533 | ANIA_01711 | ANIA_02147 | ANIA_02932 | ANIA_02989 | ANIA_03167 | ANIA_03176 | ANIA_03411 | ANIA_03427 | ANIA_03794 | ANIA_03938 | ANIA_04202 | ANIA_04232 | ANIA_04233 | ANIA_04298 | ANIA_0433…	3.9095e-18	2.6741e-16	66 / 302	66 / 638
11.02.01	rRNA synthesis	Transcription	ANIA_00074 | ANIA_00192 | ANIA_00312 | ANIA_00421 | ANIA_00589 | ANIA_00647 | ANIA_00695 | ANIA_00745 | ANIA_01949 | ANIA_02415 | ANIA_02747 | ANIA_03167 | ANIA_03176 | ANIA_03313 | ANIA_03745 | ANIA_03827 | ANIA_03944 | ANIA_04346 | ANIA_04456 | ANIA_04618 | ANIA_04865 | ANIA_06171 | ANIA_06558 | ANIA_07205 | ANIA_08073 | ANIA_08272 | ANIA_09102 | ANIA_10352 | ANIA_10501 | ANIA_10970	3.9074e-17	2.2272e-15	30 / 71	30 / 638
11.06.01	rRNA modification	Transcription	ANIA_00092 | ANIA_00647 | ANIA_00695 | ANIA_00745 | ANIA_03167 | ANIA_03313 | ANIA_04298 | ANIA_04456 | ANIA_05340 | ANIA_06171 | ANIA_08254 | ANIA_08851 | ANIA_10352 | ANIA_10712	3.9165e-13	1.9135e-11	14 / 19	14 / 638
12.07	translational control	Protein synthesis	ANIA_00421 | ANIA_01345 | ANIA_02932 | ANIA_03411 | ANIA_03413 | ANIA_03961 | ANIA_04290 | ANIA_04330 | ANIA_04530 | ANIA_04803 | ANIA_04865 | ANIA_05055 | ANIA_05222 | ANIA_05770 | ANIA_06156 | ANIA_06540 | ANIA_06563 | ANIA_10249	3.8545e-05	0.0016478	18 / 91	18 / 638
01.05.13	transfer of activated C-1 groups	Metabolism	ANIA_00092 | ANIA_00745 | ANIA_01445 | ANIA_03096 | ANIA_03313 | ANIA_03996 | ANIA_04685 | ANIA_05789 | ANIA_05871 | ANIA_05998 | ANIA_09406 | ANIA_10526	0.00011076	0.0042089	12 / 50	12 / 638
16.01	protein binding	Protein with binding function or cofactor requirement (structural or analytic)	ANIA_00074 | ANIA_00192 | ANIA_00262 | ANIA_00310 | ANIA_00433 | ANIA_00445 | ANIA_00465 | ANIA_00641 | ANIA_00647 | ANIA_00695 | ANIA_00745 | ANIA_00776 | ANIA_00796 | ANIA_00814 | ANIA_00843 | ANIA_01013 | ANIA_01122 | ANIA_01166 | ANIA_01223 | ANIA_01228 | ANIA_01256 | ANIA_01345 | ANIA_01367 | ANIA_01408 | ANIA_01533 | ANIA_01666 | ANIA_01711 | ANIA_01904 | ANIA_01962 | ANIA_02120 | ANIA_0236…	0.00074369	0.025434	127 / 1435	127 / 638
42.10.07	nucleolus	Biogenesis of cellular components	ANIA_03167 | ANIA_03827 | ANIA_08851	0.001246	0.03874	3 / 4	3 / 638
Strain:	DatfA
Stress:	diamide
Group:	up-regulated genes
1. AspGD Gene Ontology Term Finder (http://www.aspergillusgenome.org/cgi-bin/GO/goTermFinder)
GOID	GO_term	Cluster frequency	Background frequency	Corrected P-value	False discovery rate	Gene(s) annotated to the term	Directly Annotated GOID List
No significant ontology term can be found for input genes.	No significant ontology term can be found for input genes.	No significant ontology term can be found for input genes.	No significant ontology term can be found for input genes.	No significant ontology term can be found for input genes.	No significant ontology term can be found for input genes.	No significant ontology term can be found for input genes.	No significant ontology term can be found for input genes.	No significant ontology term can be found for input genes.	No significant ontology term can be found for input genes.	No significant ontology term can be found for input genes.	No significant ontology term can be found for input genes.	No significant ontology term can be found for input genes.	No significant ontology term can be found for input genes.	No significant ontology term can be found for input genes.	No significant ontology term can be found for input genes.	No significant ontology term can be found for input genes.	No significant ontology term can be found for input genes.	No significant ontology term can be found for input genes.	No significant ontology term can be found for input genes.	No significant ontology term can be found for input genes.	No significant ontology term can be found for input genes.	No significant ontology term can be found for input genes.	No significant ontology term can be found for input genes.	No significant ontology term can be found for input genes.	No significant ontology term can be found for input genes.	No significant ontology term can be found for input genes.	No significant ontology term can be found for input genes.	No significant ontology term can be found for input genes.	No significant ontology term can be found for input genes.	No significant ontology term can be found for input genes.	No significant ontology term can be found for input genes.	No significant ontology term can be found for input genes.	No significant ontology term can be found for input genes.	No significant ontology term can be found for input genes.	No significant ontology term can be found for input genes.	No significant ontology term can be found for input genes.	No significant ontology term can be found for input genes.	No significant ontology term can be found for input genes.	No significant ontology term can be found for input genes.	No significant ontology term can be found for input genes.	No significant ontology term can be found for input genes.	No significant ontology term can be found for input genes.	No significant ontology term can be found for input genes.	No significant ontology term can be found for input genes.	No significant ontology term can be found for input genes.	No significant ontology term can be found for input genes.	No significant ontology term can be found for input genes.	No significant ontology term can be found for input genes.	No significant ontology term can be found for input genes.
2. FungiFun (https://elbe.hki-jena.de/fungifun/fungifun.php)
FunCat ID	FunCat description	FunCat main category	Gene ID(s)	Exact p-value	Adjusted p-value	# genes / category	# genes / input
1.2	secondary metabolism	Metabolism	ANIA_00195 | ANIA_00370 | ANIA_00374 | ANIA_00567 | ANIA_00992 | ANIA_01505 | ANIA_01548 | ANIA_01650 | ANIA_01679 | ANIA_02039 | ANIA_02374 | ANIA_02407 | ANIA_02559 | ANIA_02561 | ANIA_02746 | ANIA_02781 | ANIA_02891 | ANIA_02959 | ANIA_03041 | ANIA_03220 | ANIA_03805 | ANIA_03963 | ANIA_04363 | ANIA_04576 | ANIA_04905 | ANIA_05354 | ANIA_05369 | ANIA_05837 | ANIA_05918 | ANIA_06063 | ANIA_0616…	7.0214e-7	0.00020994	70 / 1054	70 / 449
01.05.03	polysaccharide metabolism	Metabolism	ANIA_01332 | ANIA_01818 | ANIA_02018 | ANIA_02227 | ANIA_02633 | ANIA_02697 | ANIA_03418 | ANIA_03504 | ANIA_03727 | ANIA_04367 | ANIA_05176 | ANIA_05449 | ANIA_06324 | ANIA_06428 | ANIA_07199 | ANIA_07230 | ANIA_07349 | ANIA_08341 | ANIA_08761 | ANIA_10277 | ANIA_11096	0.0001883	0.02815	21 / 232	21 / 449
Strain:	DatfA
Stress:	diamide
Group:	down-regulated genes
1. AspGD Gene Ontology Term Finder (http://www.aspergillusgenome.org/cgi-bin/GO/goTermFinder)
GOID	GO_term	Cluster frequency	Background frequency	Corrected P-value	False discovery rate	Gene(s) annotated to the term	Directly Annotated GOID List
42254	ribosome biogenesis	47 out of 511 genes, 9.2%	181 out of 10340 background genes, 1.8%	6.16e-19	0	AN0074:AN0092:AN0237:AN0247:AN0305:AN0421:AN0475:AN0647:AN0745:rpf2:AN10352:AN10712:cgrA:AN11773:AN1200:bop1:AN1533:AN1666:AN2292:nsa2:AN3056:nop58:spb4:AN3313:rrs1:AN3827:AN4232:AN4298:AN4460:AN4648:AN4771:AN5340:AN5865:AN5871:AN6067:AN6171:AN6310:AN6374:AN6556:AN6612:AN6651:AN6902:AN7260:AN7526:AN7674:AN8491:swoC	34473:6270:31167:8298:55:27:34462:42274:463:48315:71039:447:462:42254:71216:71038:6547:480:30174:31120:71040:7163:71051:467:8361:45947:30010:71036:70317:1732:31118:51211:71037:54:71049:71035:470:1902626:36180:495:34475:42255:32259:466:31054:973:16973:280:34476:33621:30490:1904812:30702:8033:9267:6364:6267:71044:1990258:16070:1990481:154:494:42493:71042:42256:6897:747:42273:36170:472:956:35690
6364	rRNA processing	39 out of 511 genes, 7.6%	128 out of 10340 background genes, 1.2%	4.03e-18	0	AN0074:AN0092:AN0237:AN0247:AN0305:AN0421:AN0475:AN0647:AN0745:AN10352:cgrA:AN11773:bop1:AN1533:AN2292:nsa2:AN3056:nop58:spb4:AN3313:rrs1:AN4232:AN4298:AN4460:AN4648:AN4771:AN5340:AN5865:AN5871:AN6171:AN6310:AN6374:AN6556:AN6612:AN6902:AN7260:AN7526:AN8491:swoC	34473:6270:31167:8298:55:27:34462:42274:463:48315:71039:447:462:71216:71038:6547:480:31120:30174:71040:7163:71051:467:8361:30010:71036:70317:31118:51211:71037:54:71049:71035:470:1902626:36180:495:34475:42255:32259:973:31054:466:34476:280:33621:30490:1904812:30702:8033:9267:6267:6364:71044:1990258:1990481:154:494:42493:71042:6897:747:42273:36170:956:472:35690
16072	rRNA metabolic process	39 out of 511 genes, 7.6%	140 out of 10340 background genes, 1.4%	1.41e-16	0	AN0074:AN0092:AN0237:AN0247:AN0305:AN0421:AN0475:AN0647:AN0745:AN10352:cgrA:AN11773:bop1:AN1533:AN2292:nsa2:AN3056:nop58:spb4:AN3313:rrs1:AN4232:AN4298:AN4460:AN4648:AN4771:AN5340:AN5865:AN5871:AN6171:AN6310:AN6374:AN6556:AN6612:AN6902:AN7260:AN7526:AN8491:swoC	34473:6270:31167:8298:55:27:34462:42274:463:48315:71039:447:462:71216:71038:6547:480:31120:30174:71040:7163:71051:467:8361:30010:71036:70317:31118:51211:71037:54:71049:71035:470:1902626:36180:495:34475:42255:32259:973:31054:466:34476:280:33621:30490:1904812:30702:8033:9267:6267:6364:71044:1990258:1990481:154:494:42493:71042:6897:747:42273:36170:956:472:35690
22613	ribonucleoprotein complex biogenesis	47 out of 511 genes, 9.2%	205 out of 10340 background genes, 2.0%	1.65e-16	0	AN0074:AN0092:AN0237:AN0247:AN0305:AN0421:AN0475:AN0647:AN0745:rpf2:AN10352:AN10712:cgrA:AN11773:AN1200:bop1:AN1533:AN1666:AN2292:nsa2:AN3056:nop58:spb4:AN3313:rrs1:AN3827:AN4232:AN4298:AN4460:AN4648:AN4771:AN5340:AN5865:AN5871:AN6067:AN6171:AN6310:AN6374:AN6556:AN6612:AN6651:AN6902:AN7260:AN7526:AN7674:AN8491:swoC	34473:6270:31167:8298:55:27:34462:42274:463:48315:71039:447:462:42254:71216:71038:6547:480:30174:71040:31120:7163:71051:467:8361:45947:30010:71036:70317:1732:31118:51211:71037:54:71049:71035:470:1902626:36180:495:34475:42255:32259:973:31054:466:16973:34476:280:33621:30490:1904812:30702:8033:9267:6267:6364:71044:16070:1990258:1990481:154:494:42493:42256:71042:6897:747:42273:36170:956:472:35690
34470	ncRNA processing	43 out of 511 genes, 8.4%	197 out of 10340 background genes, 1.9%	4.27e-14	0	AN0074:AN0092:AN0141:AN0237:AN0247:AN0305:AN0421:AN0475:AN0647:AN0745:AN10352:AN10832:cgrA:AN11773:bop1:AN1533:AN2292:AN2451:nsa2:AN3056:nop58:spb4:AN3313:rrs1:AN4232:AN4298:AN4460:AN4648:AN4771:AN5340:AN5865:AN5871:AN6171:AN6310:AN6374:AN6556:AN6612:AN6902:AN7260:AN7526:AN8066:AN8491:swoC	34473:6413:32447:6270:31167:8298:55:27:34462:42274:463:48315:71039:447:462:71216:71038:6547:480:31120:30174:71040:7163:71051:467:8361:30010:6400:71036:70317:31118:51211:71037:54:71049:71035:470:1902626:36180:495:34475:42255:32259:973:31054:466:34476:280:33621:30490:1904812:30702:8033:2098:9267:30488:6267:6364:6302:71044:1990258:1990481:154:494:42493:71042:6897:747:42273:36170:956:6357:472:35690
34660	ncRNA metabolic process	45 out of 511 genes, 8.8%	260 out of 10340 background genes, 2.5%	7.06e-11	0	AN0074:AN0092:AN0141:AN0237:AN0247:AN0305:AN0421:AN0475:AN0647:AN0745:AN10352:AN10712:AN10832:cgrA:AN11773:bop1:AN1533:AN2292:AN2415:AN2451:nsa2:AN3056:nop58:spb4:AN3313:rrs1:AN4232:AN4298:AN4460:AN4648:AN4771:AN5340:AN5865:AN5871:AN6171:AN6310:AN6374:AN6556:AN6612:AN6902:AN7260:AN7526:AN8066:AN8491:swoC	34473:6413:70893:32447:6270:31167:8298:55:27:34462:42274:463:48315:42797:71039:447:462:42254:71216:71038:6547:480:30174:71040:31120:7163:71051:467:8361:30010:6400:71036:70317:31118:51211:71037:54:71049:71035:6360:470:1902626:36180:495:34475:42255:32259:973:31054:466:34476:280:33621:30490:1904812:30702:8033:2098:9267:30488:6267:6364:6302:71044:1990258:1990481:154:494:42493:71042:6897:747:42273:361…
42273	ribosomal large subunit biogenesis	19 out of 511 genes, 3.7%	57 out of 10340 background genes, 0.6%	9.01e-09	0	AN0074:AN0237:rpf2:AN1200:bop1:nsa2:spb4:rrs1:AN4232:AN4771:AN5865:AN5871:AN6310:AN6374:AN6556:AN6612:AN6902:AN7674:AN8491	31167:8298:55:27:463:447:480:30174:8361:54:470:1902626:42255:466:280:30702:6267:6364:747:42273:956:472:35690
6396	RNA processing	44 out of 511 genes, 8.6%	287 out of 10340 background genes, 2.8%	9.98e-09	0	AN0074:AN0092:AN0141:AN0237:AN0247:AN0305:AN0421:AN0475:AN0647:AN0745:AN10352:AN10832:cgrA:AN11773:bop1:AN1533:AN2292:AN2451:nsa2:AN3056:nop58:spb4:AN3313:rrs1:AN4232:AN4298:AN4460:AN4648:AN4771:AN5340:AN5865:AN5871:AN6171:AN6310:AN6374:AN6540:AN6556:AN6612:AN6902:AN7260:AN7526:AN8066:AN8491:swoC	34473:6413:32447:6270:31167:8298:55:27:34462:42274:463:48315:71039:447:462:71216:71038:6547:480:31120:30174:71040:7163:71051:467:8361:30010:6400:71036:70317:31118:51211:71037:54:71049:71035:6396:470:1902626:36180:495:43488:34475:42255:32259:973:31054:466:957:34476:280:33621:30490:1904812:30702:8033:2098:9267:30488:6267:6364:6302:71044:1990258:1990481:154:494:42493:71042:6897:747:42273:36170:956:6…
42274	ribosomal small subunit biogenesis	17 out of 511 genes, 3.3%	70 out of 10340 background genes, 0.7%	2.45e-05	0	AN0247:AN0305:AN0421:AN0475:AN0647:AN1533:AN2292:AN3056:nop58:AN3313:rrs1:AN4298:AN5340:AN6171:AN6556:AN6651:AN7526	8298:55:34462:42274:447:462:71216:6547:480:70317:36180:42255:16973:30490:1904812:9267:6364:154:42273:36170:472:35690
90304	nucleic acid metabolic process	81 out of 511 genes, 15.9%	900 out of 10340 background genes, 8.7%	4.07e-05	0	AN0074:AN0092:AN0141:AN0228:AN0237:AN0247:AN0260:AN0305:AN0421:AN0475:AN0647:AN0745:AN0872:AN10352:AN10497:AN10670:AN10712:AN10832:AN11098:cgrA:AN11197:AN11773:AN12419:bop1:AN1479:AN1533:mshA:nosA:AN2292:AN2415:AN2451:nsa2:AN2973:AN3048:AN3050:AN3056:AN3067:AN3116:nop58:spb4:AN3313:rrs1:AN3749:AN3846:AN4232:AN4298:recQ:AN4460:AN4581:AN4648:AN4744:AN4771:AN5112:AN5114:AN5340:AN5865:AN5871:AN6067:A…	34473:15074:6279:70893:6352:6270:55:27:48478:6281:42274:463:48315:42797:70791:6284:42766:42254:71038:43111:30174:71040:8361:8295:45947:30010:71036:35961:1900413:1732:1903459:9847:71035:6360:1902626:729:727:495:43488:10964:42276:973:31054:32933:957:34476:280:30490:6355:6351:6525:6366:30702:30466:45004:9267:6298:30488:6267:6302:71044:1990481:154:494:42256:31573:71042:16584:70787:747:42273:51097:361…
44085	cellular component biogenesis	58 out of 511 genes, 11.4%	568 out of 10340 background genes, 5.5%	6.15e-05	0	AN0074:AN0092:AN0228:AN0237:AN0247:AN0305:AN0421:AN0475:AN0647:AN0745:AN0872:rpf2:AN10261:AN10352:FKBP5:AN10712:cgrA:AN11773:AN1200:bop1:AN1533:AN1666:gcpD:AN2292:nsa2:AN2973:AN3056:nop58:spb4:AN3313:apsB:rrs1:AN3827:AN4232:AN4298:AN4460:AN4648:AN4771:AN5340:AN5865:AN5871:agsA:AN6067:AN6070:AN6171:AN6310:AN6374:AN6556:AN6612:AN6651:AN6902:AN7260:AN7526:AN7674:AN8491:rodA:swoC:AN9380	42243:34473:6279:6270:55:27:48478:42274:463:48315:31023:9272:40009:42766:42254:71038:30476:70072:30174:71040:742:8361:45947:30010:71036:1732:9847:31671:71035:30473:1902626:729:6334:727:495:973:31054:70596:34476:280:30490:30702:30466:9267:412:6267:71044:1990481:154:494:42256:71042:16584:747:7097:42273:36170:6271:956:1902977:6582:70869:43935:5975:31167:8298:34462:51315:71039:447:33566:6348:72428:46…
480	endonucleolytic cleavage in 5'-ETS of tricistronic rRNA transcript (SSU-rRNA, 5.8S rRNA, LSU-rRNA)	8 out of 511 genes, 1.6%	15 out of 10340 background genes, 0.1%	0.00011	0	AN0305:AN0421:AN0475:AN1533:nop58:AN4298:AN5340:AN6556	9267:42273:36170:8298:34462:447:71216:480:36180:472:35690
16070	RNA metabolic process	65 out of 511 genes, 12.7%	683 out of 10340 background genes, 6.6%	0.00013	0	AN0074:AN0092:AN0141:AN0237:AN0247:AN0260:AN0305:AN0421:AN0475:AN0647:AN0745:AN10352:AN10670:AN10712:AN10832:AN11098:cgrA:AN11197:AN11773:AN12419:bop1:AN1533:nosA:AN2292:AN2415:AN2451:nsa2:AN3050:AN3056:AN3067:AN3116:nop58:spb4:AN3313:rrs1:AN4232:AN4298:AN4460:AN4581:AN4648:AN4744:AN4771:AN5114:AN5340:AN5865:AN5871:AN6067:AN6171:AN6310:AN6374:AN6540:AN6556:AN6612:AN6902:AN7260:AN7325:AN7526:AN766…	34473:6279:70893:6352:6270:55:27:42274:463:48315:42797:70791:6284:42254:71038:30174:71040:8361:45947:30010:71036:35961:1900413:1732:1903459:71035:6360:1902626:495:43488:10964:42276:973:31054:32933:957:34476:280:30490:6355:6351:6366:30702:45004:9267:30488:6267:6302:71044:1990481:154:494:42256:31573:71042:70787:747:42273:36170:956:6879:9405:33314:6269:30448:6413:32447:45893:31167:8298:6297:34462:71…
460	maturation of 5.8S rRNA	13 out of 511 genes, 2.5%	48 out of 10340 background genes, 0.5%	0.00026	0	AN0237:AN0305:AN0421:AN0475:AN11773:AN1533:nsa2:nop58:rrs1:AN4298:AN5340:AN6556:AN6612	34473:55:463:71038:71040:71036:71035:973:31054:34476:9267:71044:71042:42273:36170:8298:34462:71039:447:71216:480:71051:467:71037:71049:36180:34475:42255:466:33621:472:35690
466	maturation of 5.8S rRNA from tricistronic rRNA transcript (SSU-rRNA, 5.8S rRNA, LSU-rRNA)	13 out of 511 genes, 2.5%	48 out of 10340 background genes, 0.5%	0.00026	0	AN0237:AN0305:AN0421:AN0475:AN11773:AN1533:nsa2:nop58:rrs1:AN4298:AN5340:AN6556:AN6612	34473:55:463:71038:71040:71036:71035:973:31054:34476:9267:71044:71042:42273:36170:8298:34462:71039:447:71216:480:71051:467:71037:71049:36180:34475:42255:466:33621:472:35690
30490	maturation of SSU-rRNA	14 out of 511 genes, 2.7%	60 out of 10340 background genes, 0.6%	0.00068	0	AN0247:AN0305:AN0421:AN0475:AN1533:AN2292:AN3056:nop58:AN3313:rrs1:AN4298:AN5340:AN6556:AN7526	55:30490:9267:154:42273:36170:8298:34462:447:462:71216:6547:480:70317:36180:42255:1904812:472:35690
34471	ncRNA 5'-end processing	7 out of 511 genes, 1.4%	15 out of 10340 background genes, 0.1%	0.00233	0	AN0305:AN0421:AN0475:AN1533:nop58:AN4298:AN6556	9267:42273:36170:8298:34462:447:71216:480:36180:472:35690
472	endonucleolytic cleavage to generate mature 5'-end of SSU-rRNA from (SSU-rRNA, 5.8S rRNA, LSU-rRNA)	7 out of 511 genes, 1.4%	15 out of 10340 background genes, 0.1%	0.00233	0	AN0305:AN0421:AN0475:AN1533:nop58:AN4298:AN6556	9267:42273:36170:8298:34462:447:71216:480:36180:472:35690
966	RNA 5'-end processing	7 out of 511 genes, 1.4%	15 out of 10340 background genes, 0.1%	0.00233	0	AN0305:AN0421:AN0475:AN1533:nop58:AN4298:AN6556	9267:42273:36170:8298:34462:447:71216:480:36180:472:35690
967	rRNA 5'-end processing	7 out of 511 genes, 1.4%	15 out of 10340 background genes, 0.1%	0.00233	0	AN0305:AN0421:AN0475:AN1533:nop58:AN4298:AN6556	9267:42273:36170:8298:34462:447:71216:480:36180:472:35690
6139	nucleobase-containing compound metabolic process	90 out of 511 genes, 17.6%	1140 out of 10340 background genes, 11.0%	0.00246	0	AN0067:AN0074:AN0092:AN0141:AN0228:AN0237:AN0247:AN0260:AN0305:AN0421:AN0475:AN0647:AN0745:AN0872:AN10352:AN10497:AN10670:AN10712:AN10832:AN10837:AN11098:cgrA:AN11197:AN11773:AN12419:bop1:AN1479:AN1533:mshA:AN1806:nosA:AN2292:AN2415:AN2451:nsa2:AN2973:AN3048:AN3050:AN3056:AN3067:AN3116:nop58:spb4:AN3313:AN3557:rrs1:AN3749:AN3846:AN4232:AN4298:recQ:AN4460:AN4581:AN4648:AN4744:AN4771:pmaA:AN5112:AN…	34473:9116:15074:1901907:6279:70893:6352:6270:55:27:48478:6281:42274:463:48315:42797:6754:70791:6284:42766:42254:71038:43111:30174:71040:9113:8361:8295:45947:30010:71036:35961:1900413:1732:1903459:9847:71035:6360:9108:1902626:729:46855:6091:6240:727:495:43488:10964:42276:973:31054:32933:957:34476:280:30490:6355:6351:6525:6366:30702:30466:45004:1901911:46704:9267:6298:30488:6267:6302:71044:1990481…
447	endonucleolytic cleavage in ITS1 to separate SSU-rRNA from 5.8S rRNA and LSU-rRNA from tricistronic rRNA transcript (SSU-rRNA, 5.8S rRNA, LSU-rRNA)	9 out of 511 genes, 1.8%	28 out of 10340 background genes, 0.3%	0.00361	0	AN0305:AN0421:AN0475:AN1533:nop58:rrs1:AN4298:AN5340:AN6556	55:9267:42273:36170:8298:34462:447:71216:480:36180:42255:472:35690
462	maturation of SSU-rRNA from tricistronic rRNA transcript (SSU-rRNA, 5.8S rRNA, LSU-rRNA)	12 out of 511 genes, 2.3%	52 out of 10340 background genes, 0.5%	0.00467	0	AN0305:AN0421:AN0475:AN1533:AN2292:nop58:AN3313:rrs1:AN4298:AN5340:AN6556:AN7526	55:9267:154:42273:36170:8298:34462:447:462:71216:6547:480:36180:42255:472:35690
42255	ribosome assembly	10 out of 511 genes, 2.0%	40 out of 10340 background genes, 0.4%	0.01308	0	AN0421:rpf2:AN1200:spb4:rrs1:AN4232:AN4771:AN6067:AN6310:AN6902	55:27:463:30174:8361:45947:1732:1902626:30702:6267:42256:747:42273:956:34462:447:480:470:42255:6364:16070:472:35690
479	endonucleolytic cleavage of tricistronic rRNA transcript (SSU-rRNA, 5.8S rRNA, LSU-rRNA)	9 out of 511 genes, 1.8%	34 out of 10340 background genes, 0.3%	0.02106	0.0008	AN0305:AN0421:AN0475:AN1533:nop58:rrs1:AN4298:AN5340:AN6556	55:9267:42273:36170:8298:34462:447:71216:480:36180:42255:472:35690
478	endonucleolytic cleavage involved in rRNA processing	9 out of 511 genes, 1.8%	35 out of 10340 background genes, 0.3%	0.02712	0.0008	AN0305:AN0421:AN0475:AN1533:nop58:rrs1:AN4298:AN5340:AN6556	55:9267:42273:36170:8298:34462:447:71216:480:36180:42255:472:35690
46483	heterocycle metabolic process	98 out of 511 genes, 19.2%	1352 out of 10340 background genes, 13.1%	0.03147	0.0007	AN0067:AN0074:AN0092:AN0141:mdpC:AN0228:AN0237:AN0247:AN0260:AN0305:AN0421:AN0475:AN0647:AN0745:AN0872:mdpB:AN10352:AN10497:AN10670:AN10712:AN10832:AN10837:AN11098:cgrA:AN11197:AN11773:AN12419:bop1:AN1479:AN1533:mshA:AN1806:nosA:AN2292:AN2415:AN2451:easA:easB:easD:nsa2:AN2973:AN3048:AN3050:AN3056:AN3067:AN3116:nop58:spb4:AN3313:AN3557:rrs1:AN3749:AN3846:AN4232:AN4298:recQ:AN4460:AN4581:AN4648:AN4…	34473:9116:15074:1901907:6279:70893:44550:6352:6270:55:27:48478:6281:42274:463:48315:2001310:42797:1900617:6754:70791:6284:1900805:42766:42254:71038:43111:45461:30174:71040:19748:9113:8361:8295:45947:30010:71036:35961:1900413:1732:1903459:9847:1900584:71035:6360:9108:1902626:729:46855:6091:6240:727:495:43488:1900557:10964:42276:1900772:973:31054:32933:957:34476:280:30490:6355:6351:6525:6366:30702…
90502	RNA phosphodiester bond hydrolysis, endonucleolytic	9 out of 511 genes, 1.8%	36 out of 10340 background genes, 0.3%	0.0346	0.0021	AN0305:AN0421:AN0475:AN1533:nop58:rrs1:AN4298:AN5340:AN6556	55:9267:42273:36170:8298:34462:447:71216:480:36180:42255:472:35690
469	cleavage involved in rRNA processing	10 out of 511 genes, 2.0%	45 out of 10340 background genes, 0.4%	0.03941	0.0021	AN0305:AN0421:AN0475:AN11773:AN1533:nop58:rrs1:AN4298:AN5340:AN6556	34473:55:71038:71040:71036:71035:973:31054:34476:9267:71044:71042:42273:36170:8298:34462:71039:447:71216:480:71051:467:71037:71049:36180:34475:42255:33621:472:35690
6725	cellular aromatic compound metabolic process	97 out of 511 genes, 19.0%	1344 out of 10340 background genes, 13.0%	0.0412	0.002	AN0067:AN0074:AN0092:AN0141:mdpC:AN0228:ivoB:AN0237:AN0247:AN0260:AN0305:AN0421:AN0475:AN0647:AN0745:AN0872:mdpB:AN10352:AN10497:AN10670:AN10712:AN10832:AN10837:AN11098:cgrA:AN11197:AN11773:AN12419:bop1:AN1479:AN1533:mshA:AN1806:nosA:AN2292:AN2415:AN2451:easA:easB:nsa2:AN2973:AN3048:AN3050:AN3056:AN3067:AN3116:nop58:spb4:AN3313:AN3557:rrs1:AN3749:AN3846:AN4232:AN4298:recQ:AN4460:AN4581:AN4648:AN4…	34473:9116:15074:1901907:6279:70893:44550:6352:6270:55:27:48478:6281:42274:463:48315:42797:9272:6754:70791:6284:1900805:42766:42254:71038:43111:45461:30174:71040:19748:9113:8361:8295:45947:30010:71036:35961:1900413:1732:1903459:9847:31671:1900584:71035:6360:9108:1902626:729:46855:6091:6240:727:495:43488:1900557:10964:42276:1900772:973:31054:32933:957:70596:34476:280:30490:6355:6351:6525:6366:3070…
2. FungiFun (https://elbe.hki-jena.de/fungifun/fungifun.php)
FunCat ID	FunCat description	FunCat main category	Gene ID(s)	Exact p-value	Adjusted p-value	# genes / category	# genes / input
11.04.01	rRNA processing	Transcription	ANIA_00074 | ANIA_00092 | ANIA_00237 | ANIA_00305 | ANIA_00421 | ANIA_00475 | ANIA_00589 | ANIA_00637 | ANIA_00647 | ANIA_00745 | ANIA_00944 | ANIA_01367 | ANIA_01533 | ANIA_02292 | ANIA_03167 | ANIA_03176 | ANIA_03313 | ANIA_03745 | ANIA_03794 | ANIA_03827 | ANIA_04298 | ANIA_04330 | ANIA_04456 | ANIA_04460 | ANIA_04648 | ANIA_04748 | ANIA_04771 | ANIA_04865 | ANIA_05010 | ANIA_05340 | ANIA_0587…	1.3146e-22	4.5091e-20	48 / 182	48 / 525
12.01	ribosome biogenesis	Protein synthesis	ANIA_00074 | ANIA_00475 | ANIA_00637 | ANIA_00647 | ANIA_00844 | ANIA_01200 | ANIA_01366 | ANIA_01367 | ANIA_01533 | ANIA_01666 | ANIA_02120 | ANIA_02926 | ANIA_03313 | ANIA_03745 | ANIA_03827 | ANIA_04065 | ANIA_04298 | ANIA_04330 | ANIA_04346 | ANIA_04648 | ANIA_04865 | ANIA_05865 | ANIA_06067 | ANIA_06085 | ANIA_06171 | ANIA_06200 | ANIA_06374 | ANIA_06612 | ANIA_06902 | ANIA_07260 | ANIA_0752…	2.2409e-14	3.8432e-12	37 / 173	37 / 525
11.06.01	rRNA modification	Transcription	ANIA_00092 | ANIA_00647 | ANIA_00745 | ANIA_03167 | ANIA_03313 | ANIA_04298 | ANIA_04456 | ANIA_05340 | ANIA_06171 | ANIA_08851 | ANIA_10352 | ANIA_10712	8.5457e-12	9.7706e-10	12 / 19	12 / 525
11.02.01	rRNA synthesis	Transcription	ANIA_00074 | ANIA_00421 | ANIA_00589 | ANIA_00647 | ANIA_00745 | ANIA_00944 | ANIA_02415 | ANIA_03116 | ANIA_03167 | ANIA_03176 | ANIA_03313 | ANIA_03745 | ANIA_03827 | ANIA_04346 | ANIA_04456 | ANIA_04865 | ANIA_06171 | ANIA_08272 | ANIA_09102 | ANIA_10352	1.4548e-10	1.2475e-8	20 / 71	20 / 525
16.03.03	RNA binding	Protein with binding function or cofactor requirement (structural or analytic)	ANIA_00305 | ANIA_00421 | ANIA_00475 | ANIA_00637 | ANIA_00647 | ANIA_00745 | ANIA_00944 | ANIA_01452 | ANIA_01533 | ANIA_03167 | ANIA_03176 | ANIA_03427 | ANIA_03794 | ANIA_04232 | ANIA_04298 | ANIA_04330 | ANIA_04346 | ANIA_04456 | ANIA_04460 | ANIA_04648 | ANIA_04865 | ANIA_05010 | ANIA_05114 | ANIA_05340 | ANIA_06085 | ANIA_06171 | ANIA_06374 | ANIA_08851 | ANIA_10055 | ANIA_10200 | ANIA_1035…	2.7843e-06	0.000191	35 / 302	35 / 525
10.01.03.03	ori recognition and priming complex formation	Cell cycle and DNA processing	ANIA_00228 | ANIA_00260 | ANIA_00872 | ANIA_05676 | ANIA_06070 | ANIA_07260 | ANIA_10497	9.7487e-05	0.005573	7 / 23	7 / 525
42.10.07	nucleolus	Biogenesis of cellular components	ANIA_03167 | ANIA_03827 | ANIA_08851	0.00049693	0.024349	3 / 4	3 / 525
[truncated: 206 more columns]

## Sheet: AtfA-dependent genes
Supplementary Table 3		Gene enrichment analysis of stress responsive genes.					Sheet 3 - AtfA-dependent genes (up- and down-regulated gene groups)
Strain:	control
Stress:	MSB
Group:	AtfA-dependent up-regulated genes
1. AspGD Gene Ontology Term Finder (http://www.aspergillusgenome.org/cgi-bin/GO/goTermFinder)
GOID	GO_term	Cluster frequency	Background frequency	Corrected P-value	False discovery rate	Gene(s) annotated to the term	Directly Annotated GOID List
No significant ontology term can be found for input genes.
2. FungiFun (https://elbe.hki-jena.de/fungifun/fungifun.php)
FunCat ID	FunCat description	FunCat main category	Gene ID(s)	Exact p-value	Adjusted p-value	# genes / category	# genes / input
20.03.25	ABC transporters	Cellular transport, transport facilitation and transport routes	ANIA_02707 | ANIA_04180 | ANIA_05370 | ANIA_06237 | ANIA_06512 | ANIA_06996 | ANIA_07729 | ANIA_08095 | ANIA_08733 | ANIA_09370	0.00012452	0.037605	10 / 84	10 / 370
20.01.27	drug/toxin transport	Cellular transport, transport facilitation and transport routes	ANIA_00498 | ANIA_01423 | ANIA_02531 | ANIA_02707 | ANIA_04180 | ANIA_05140 | ANIA_05369 | ANIA_05370 | ANIA_06237 | ANIA_07729 | ANIA_08095 | ANIA_08621 | ANIA_09219 | ANIA_09370	0.00027304	0.04123	14 / 167	14 / 370
Strain:	control
Stress:	MSB
Group:	AtfA-dependent down-regulated genes
1. AspGD Gene Ontology Term Finder (http://www.aspergillusgenome.org/cgi-bin/GO/goTermFinder)
GOID	GO_term	Cluster frequency	Background frequency	Corrected P-value	False discovery rate	Gene(s) annotated to the term	Directly Annotated GOID List
6412	translation	38 out of 504 genes, 7.5%	199 out of 10340 background genes, 1.9%	2.77e-10	0	AN0278:AN0433:AN0445:AN0570:AN0776:AN1013:AN10416:AN10681:AN1122:AN11419:AN12246:AN2301:AN3823:AN4073:AN4087:AN4475:AN4494:AN4522:AN4794:AN4802:AN4803:ubi1:AN4916:AN5441:AN5715:AN5979:AN5996:AN5997:AN6181:rpl3:AN6526:AN6563:AN7354:AN8176:AN8856:AN9097:AN9465:AN9468	42254:2181:6412:6310:45903:16567:461:45944:6414:42255:2109:6449:27:32543:45860:28:6429:6407:6450:447:448:2182:35690:56:462:372:16236
43603	cellular amide metabolic process	50 out of 504 genes, 9.9%	339 out of 10340 background genes, 3.3%	1.52e-09	0	AN0278:AN0433:AN0445:aldA:AN0570:spdA:AN0776:ureB:AN1013:AN10416:AN10681:AN10795:AN1122:AN11419:AN12246:AN1638:AN1689:gatA:AN2301:easB:AN3823:AN4073:AN4087:AN4282:AN4475:AN4494:AN4522:AN4794:AN4802:AN4803:ubi1:AN4916:AN5441:AN5715:AN5979:AN5996:AN5997:AN6181:rpl3:AN6526:AN6563:bioB:aatB:AN7354:AN8176:AN8856:AN9097:AN9460:AN9465:AN9468	1900584:6536:19556:9108:43171:97308:6081:16567:1900557:43605:45944:6414:42255:71470:9073:2109:6449:27:9102:32543:9450:28:45991:6567:6429:6525:447:2182:19482:462:43419:1900815:6067:42254:55114:2181:45461:6412:6310:45903:19748:461:45047:6540:46187:9438:45329:45860:8295:19413:6407:42318:6450:6508:448:56:35690:6465:372:16236:15940:1902086
1901566	organonitrogen compound biosynthetic process	78 out of 504 genes, 15.5%	696 out of 10340 background genes, 6.7%	1.93e-09	0	AN0050:AN0278:AN0433:AN0445:aldA:AN0570:manA:spdA:AN0776:mns1B:AN1013:AN10416:AN10681:riboG:AN10981:AN11111:phenA:AN1122:AN11419:AN12246:AN1271:AN1455:oliC:AN1689:AN2096:AN2240:AN2293:AN2301:easB:AN2733:AN3431:AN3634:AN3748:AN3823:AN4058:AN4073:AN4087:pcmA:AN4475:AN4494:AN4522:AN4623:AN4683:pmtB:AN4794:AN4802:AN4803:ubi1:AN4916:gltA:AN5441:AN5715:AN5979:AN5996:AN5997:AN6181:rpl3:AN6209:AN6276:AN6…	45861:43936:32:916:30448:6235:97308:6081:162:45944:9073:9435:6449:9231:27:9102:6013:30433:45991:31589:48315:6567:6429:447:15986:6227:2182:70791:462:40009:1900815:6067:42254:6486:71216:55114:6520:71712:6547:6537:16311:45461:6310:19748:18279:15867:9064:1900101:6487:71472:46187:30968:45329:19563:34221:8295:6031:19413:6233:31505:6450:34354:6038:56:9082:15991:6461:1900584:44117:9108:6783:6091:36180:35…
6518	peptide metabolic process	42 out of 504 genes, 8.3%	255 out of 10340 background genes, 2.5%	2.68e-09	0	AN0278:AN0433:AN0445:AN0570:AN0776:AN1013:AN10416:AN10681:AN1122:AN11419:AN12246:AN1638:AN2301:easB:AN3823:AN4073:AN4087:AN4282:AN4475:AN4494:AN4522:AN4794:AN4802:AN4803:ubi1:AN4916:AN5441:AN5715:AN5979:AN5996:AN5997:AN6181:rpl3:AN6526:AN6563:AN7354:AN8176:AN8856:AN9097:AN9460:AN9465:AN9468	43171:45944:6449:27:6429:447:2182:462:1900815:42254:55114:45461:6310:19748:45047:6450:56:1900584:16567:1900557:6414:42255:2109:32543:28:2181:6412:45903:461:45860:6407:6508:448:35690:6465:372:16236:1902086
43043	peptide biosynthetic process	39 out of 504 genes, 7.7%	234 out of 10340 background genes, 2.3%	1.16e-08	0	AN0278:AN0433:AN0445:AN0570:AN0776:AN1013:AN10416:AN10681:AN1122:AN11419:AN12246:AN2301:easB:AN3823:AN4073:AN4087:AN4475:AN4494:AN4522:AN4794:AN4802:AN4803:ubi1:AN4916:AN5441:AN5715:AN5979:AN5996:AN5997:AN6181:rpl3:AN6526:AN6563:AN7354:AN8176:AN8856:AN9097:AN9465:AN9468	45944:6449:27:6429:447:2182:462:1900815:42254:55114:45461:6310:19748:6450:56:1900584:16567:1900557:6414:42255:2109:32543:28:2181:6412:45903:461:45860:6407:448:35690:372:16236:1902086
43604	amide biosynthetic process	44 out of 504 genes, 8.7%	290 out of 10340 background genes, 2.8%	1.4e-08	0	AN0278:AN0433:AN0445:aldA:AN0570:spdA:AN0776:AN1013:AN10416:AN10681:AN1122:AN11419:AN12246:AN1689:AN2301:easB:AN3823:AN4073:AN4087:AN4475:AN4494:AN4522:AN4794:AN4802:AN4803:ubi1:AN4916:AN5441:AN5715:AN5979:AN5996:AN5997:AN6181:rpl3:AN6526:AN6563:bioB:aatB:AN7354:AN8176:AN8856:AN9097:AN9465:AN9468	97308:6081:45944:9073:6449:27:9102:45991:6567:6429:447:2182:462:1900815:6067:42254:55114:45461:6310:19748:46187:45329:8295:19413:6450:56:1900584:9108:16567:1900557:6414:42255:71470:2109:32543:28:6525:19482:2181:6412:45903:461:9438:45860:6407:42318:448:35690:372:15940:16236:1902086
1901564	organonitrogen compound metabolic process	129 out of 504 genes, 25.6%	1553 out of 10340 background genes, 15.0%	1.82e-07	0	AN0050:AN0174:AN0278:AN0357:AN0433:AN0445:aldA:AN0570:AN0593:manA:spdA:AN0776:mns1B:cdc20:AN0862:AN0905:ureB:AN1013:AN10146:AN10258:AN10351:AN10416:AN10681:AN10702:riboG:AN10795:AN10872:AN10981:AN11111:phenA:AN1122:AN11419:AN12246:AN1271:AN1455:cysF:plkA:oliC:AN1638:AN1689:AN1851:AN1904:acuF:AN2054:AN2096:AN2133:AN2240:gatA:AN2293:AN2301:AN2366:easB:AN2572:AN2733:mps1:AN3431:AN3634:AN3748:AN3823:…	32:1900409:6974:1902426:43171:45944:9435:72480:72429:45991:6281:31589:48315:6567:6429:1902542:6227:6116:70791:42254:71712:45461:45836:42787:15867:1900101:30968:2000060:45329:19563:8295:19441:6233:45819:51754:6038:9082:6090:51229:1901319:19556:9108:6091:6071:46827:43605:320:6511:6527:71470:706:1990598:10696:10898:34599:31662:2000221:32210:90529:1990802:60303:1902114:10570:6098:96:97359:1902408:346…
9987	cellular process	245 out of 504 genes, 48.6%	3658 out of 10340 background genes, 35.4%	3.23e-07	0	AN0050:AN0163:AN0174:AN0179:AN0203:pdiB:AN0259:AN0278:AN0357:AN0433:AN0445:aldA:AN0570:AN0579:AN0593:manA:mipA:spdA:AN0746:AN0776:mns1B:cdc20:AN0862:AN0905:niaD:rcyA:ureB:AN1013:AN10137:AN10146:AN10223:AN10258:AN10351:AN10395:AN10416:AN10621:AN1063:AN10681:AN10700:AN10702:AN10710:riboG:AN10743:AN10795:AN10872:AN10981:teaC:AN11054:AN11111:phenA:AN1122:AN1131:AN11419:AN1154:AN11778:AN11853:AN12246:…	32:32889:1902426:43171:45991:31589:55085:6429:6227:6116:6325:42766:42254:1905412:45461:742:1900101:51666:30968:45329:1901919:6233:45819:44774:6725:9082:32220:51229:7019:9108:917:6662:6091:6071:31929:6527:32995:71470:34198:706:90295:30466:10898:71168:45004:31662:33168:90529:1990802:1903477:60303:1902114:10570:23:6098:96:46835:35082:1905168:10571:9405:30307:33314:71963:6012:51083:743:2143:43935:723…
819	sister chromatid segregation	19 out of 504 genes, 3.8%	72 out of 10340 background genes, 0.7%	1.03e-06	0	mipA:cdc20:AN10137:plkA:AN2128:AN2862:AN2963:AN2969:AN3067:AN3124:sldA:nimX:kipB:cdcA:top2:smcB:klpA:sudA:bimD	6325:1905412:742:45819:51229:7019:71470:706:10898:71168:45004:1990802:60303:10570:35082:1905168:10571:30307:33314:743:43935:31578:6297:44878:35853:6303:1902845:34501:45875:70317:35308:61171:51447:1902846:1904537:31031:30989:1990801:1990139:1902002:22:72370:7064:7093:43936:1900182:30071:1902424:31536:90561:6284:1902440:70914:1990942:6265:7059:82:10964:7076:2000817:7130:31573:1902850:31145:920:3153…
70	mitotic sister chromatid segregation	18 out of 504 genes, 3.6%	66 out of 10340 background genes, 0.6%	1.6e-06	0	mipA:cdc20:AN10137:plkA:AN2128:AN2862:AN2963:AN3067:AN3124:sldA:nimX:kipB:cdcA:top2:smcB:klpA:sudA:bimD	6325:1905412:742:45819:51229:7019:71470:706:10898:71168:45004:1990802:60303:10570:35082:1905168:10571:30307:33314:743:43935:31578:6297:44878:35853:6303:1902845:34501:45875:70317:35308:61171:51447:1902846:1904537:31031:30989:1990801:1990139:1902002:22:72370:7064:7093:43936:1900182:30071:1902424:31536:90561:6284:1902440:1990942:6265:7059:82:10964:7076:2000817:7130:31573:1902850:31145:920:31534:3044…
19538	protein metabolic process	82 out of 504 genes, 16.3%	885 out of 10340 background genes, 8.6%	7.28e-06	0	AN0278:AN0433:AN0445:AN0570:manA:AN0776:mns1B:cdc20:AN0862:AN0905:AN1013:AN10258:AN10351:AN10416:AN10681:AN10702:AN10872:AN1122:AN11419:AN12246:AN1455:plkA:AN1638:AN1851:AN1904:AN2054:AN2096:AN2240:AN2301:AN2366:AN2572:mps1:AN3823:nimT:sldA:AN4073:AN4087:nimX:sec13:pepAd:cypB:AN4475:AN4494:AN4522:AN4623:AN4683:pmtB:AN4794:AN4802:AN4803:ubi1:AN4916:cdcA:AN5441:AN5495:facA:mst1:AN5715:AN5979:AN5996…	32:1902426:43171:31589:6429:42254:1900101:30968:45819:51229:71470:706:10898:31662:1990802:60303:10570:1905168:10571:9405:30307:33314:723:447:2182:6348:44878:35853:7021:87:1902845:34501:45875:70317:35308:6457:51447:1903464:1902846:1904537:31031:1990801:1990139:16485:1902002:22:72370:45861:43936:1900182:30071:1902424:31536:27:7052:6486:413:15976:7059:16567:82:32543:15793:2000751:9267:7130:2181:79:3…
280	nuclear division	23 out of 504 genes, 4.6%	116 out of 10340 background genes, 1.1%	7.66e-06	0	mipA:cdc20:AN10137:AN10621:AN11853:plkA:AN2128:mad2:AN2862:AN2963:copA:AN3067:AN3124:AN3749:sldA:nimX:kipB:cdcA:top2:smcB:klpA:sudA:bimD	6325:1905412:742:45819:44774:51229:7019:71470:706:30466:10898:71168:45004:1990802:60303:10570:35082:1905168:10571:30307:33314:743:43935:31578:6297:44878:35853:6303:1902845:34501:45875:70317:35308:61171:51447:1902846:1904537:31031:30989:1990801:1990139:1902002:22:72370:7064:7093:43936:1900182:30071:1902424:31536:90561:6284:1902440:1990942:6265:7059:82:10964:7076:710:2000817:7130:6298:31573:1902850…
140014	mitotic nuclear division	18 out of 504 genes, 3.6%	74 out of 10340 background genes, 0.7%	1.18e-05	0	mipA:cdc20:AN10137:plkA:AN2128:AN2862:AN2963:AN3067:AN3124:sldA:nimX:kipB:cdcA:top2:smcB:klpA:sudA:bimD	6325:1905412:742:45819:51229:7019:71470:706:10898:71168:45004:1990802:60303:10570:35082:1905168:10571:30307:33314:743:43935:31578:6297:44878:35853:6303:1902845:34501:45875:70317:35308:61171:51447:1902846:1904537:31031:30989:1990801:1990139:1902002:22:72370:7064:7093:43936:1900182:30071:1902424:31536:90561:6284:1902440:1990942:6265:7059:82:10964:7076:2000817:7130:31573:1902850:31145:920:31534:3044…
1903047	mitotic cell cycle process	31 out of 504 genes, 6.2%	206 out of 10340 background genes, 2.0%	2.06e-05	0	mipA:cdc20:AN10137:plkA:AN2128:mad2:AN2686:rho4:AN2862:AN2963:AN2969:AN3067:AN3124:nimT:sldA:nimX:kipB:aspA:AN4685:myoB:cdcA:top2:tpmA:smcB:klpA:sudA:nuvG:AN6732:bimD:bimB:AN9463	6325:1905412:742:51666:45819:44774:32220:51229:7019:917:71470:706:10898:71168:45004:31662:1990802:1903477:60303:10570:35082:1905168:10571:9405:30307:33314:743:43935:723:31578:6297:44878:35853:43087:6303:87:1902845:34501:45875:70317:35308:61171:1903478:51447:1902846:1904537:31031:30989:1990801:31991:1902404:1990139:1902002:22:72370:7064:7093:43936:1900182:30071:1902424:31536:6913:90561:7052:6284:1…
48285	organelle fission	23 out of 504 genes, 4.6%	123 out of 10340 background genes, 1.2%	2.47e-05	0	mipA:cdc20:AN10137:AN10621:AN11853:plkA:AN2128:mad2:AN2862:AN2963:copA:AN3067:AN3124:AN3749:sldA:nimX:kipB:cdcA:top2:smcB:klpA:sudA:bimD	6325:1905412:742:45819:44774:51229:7019:71470:706:30466:10898:71168:45004:1990802:60303:10570:35082:1905168:10571:30307:33314:743:43935:31578:6297:44878:35853:6303:1902845:34501:45875:70317:35308:61171:51447:1902846:1904537:31031:30989:1990801:1990139:1902002:22:72370:7064:7093:43936:1900182:30071:1902424:31536:90561:6284:1902440:1990942:6265:7059:82:10964:7076:710:2000817:7130:6298:31573:1902850…
44763	single-organism cellular process	151 out of 504 genes, 30.0%	2065 out of 10340 background genes, 20.0%	3.22e-05	0	AN0050:AN0163:AN0174:pdiB:AN0259:AN0357:aldA:AN0579:AN0593:manA:mipA:spdA:mns1B:cdc20:niaD:rcyA:ureB:AN10137:AN10146:AN10621:AN10700:AN10710:riboG:AN10743:AN10795:AN10981:teaC:AN11054:AN11111:phenA:AN1154:AN11778:AN11853:AN1271:AN1455:cysF:rsdA:plkA:oliC:enaB:AN1689:acuF:AN1956:agdA:AN2096:AN2128:AN2133:AN2240:gatA:AN2293:AN2332:mad2:easB:AN2686:rho4:AN2701:AN2733:AN2862:AN2916:AN2963:ippA:AN2969…	32:32889:45991:31589:6429:6227:6116:6325:42766:1905412:45461:742:1900101:51666:30968:45329:6233:45819:44774:9082:32220:51229:7019:9108:917:6662:6091:6071:6527:71470:706:30466:10898:71168:45004:31662:33168:90529:1990802:1903477:60303:1902114:10570:23:6098:96:35082:1905168:10571:9405:30307:33314:71963:6012:743:43935:723:31578:5987:6297:6631:6337:6348:42128:44878:6537:35853:43087:6303:87:1902845:654…
278	mitotic cell cycle	31 out of 504 genes, 6.2%	210 out of 10340 background genes, 2.0%	3.27e-05	0	mipA:cdc20:AN10137:plkA:AN2128:mad2:AN2686:rho4:AN2862:AN2963:AN2969:AN3067:AN3124:nimT:sldA:nimX:kipB:aspA:AN4685:myoB:cdcA:top2:tpmA:smcB:klpA:sudA:nuvG:AN6732:bimD:bimB:AN9463	6325:1905412:742:51666:45819:44774:32220:51229:7019:917:71470:706:10898:71168:45004:31662:1990802:1903477:60303:10570:35082:1905168:10571:9405:30307:33314:743:43935:723:31578:6297:44878:35853:43087:6303:87:1902845:34501:45875:70317:35308:61171:1903478:51447:1902846:1904537:31031:30989:1990801:31991:1902404:1990139:1902002:22:72370:7064:7093:43936:1900182:30071:1902424:31536:6913:90561:7052:6284:1…
98813	nuclear chromosome segregation	19 out of 504 genes, 3.8%	88 out of 10340 background genes, 0.9%	3.76e-05	0	mipA:cdc20:AN10137:plkA:AN2128:AN2862:AN2963:AN2969:AN3067:AN3124:sldA:nimX:kipB:cdcA:top2:smcB:klpA:sudA:bimD	6325:1905412:742:45819:51229:7019:71470:706:10898:71168:45004:1990802:60303:10570:35082:1905168:10571:30307:33314:743:43935:31578:6297:44878:35853:6303:1902845:34501:45875:70317:35308:61171:51447:1902846:1904537:31031:30989:1990801:1990139:1902002:22:72370:7064:7093:43936:1900182:30071:1902424:31536:90561:6284:1902440:70914:1990942:6265:7059:82:10964:7076:2000817:7130:31573:1902850:31145:920:3153…
44267	cellular protein metabolic process	73 out of 504 genes, 14.5%	788 out of 10340 background genes, 7.6%	5.73e-05	0	AN0278:AN0433:AN0445:AN0570:manA:AN0776:mns1B:cdc20:AN0862:AN0905:AN1013:AN10258:AN10416:AN10681:AN10872:AN1122:AN11419:AN12246:AN1455:plkA:AN1851:AN1904:AN2054:AN2096:AN2240:AN2301:mps1:AN3823:nimT:sldA:AN4073:AN4087:nimX:sec13:cypB:AN4475:AN4494:AN4522:AN4623:AN4683:pmtB:AN4794:AN4802:AN4803:ubi1:AN4916:cdcA:AN5441:AN5495:facA:mst1:AN5715:AN5979:AN5996:AN5997:AN6181:rpl3:AN6214:AN6438:AN6526:AN…	32:1902426:31589:6429:42254:1900101:30968:45819:51229:71470:706:10898:31662:1990802:60303:10570:1905168:10571:9405:30307:33314:723:447:2182:6348:44878:35853:7021:87:1902845:34501:45875:70317:35308:6457:51447:1903464:1902846:1904537:31031:1990801:1990139:16485:1902002:22:72370:45861:43936:1900182:30071:1902424:31536:27:6486:413:15976:7059:16567:82:32543:15793:2000751:9267:7130:2181:79:31145:6407:3…
7017	microtubule-based process	18 out of 504 genes, 3.6%	83 out of 10340 background genes, 0.8%	8.08e-05	0	mipA:AN10137:plkA:AN2128:AN2686:rho4:AN2862:AN3124:AN3721:nimX:kipB:nup42:myoB:cdcA:klpA:tubC:uncB:bimB	742:45819:51229:7019:917:71470:706:10898:1990802:60303:10570:35082:1905168:10571:30307:71963:743:31578:44878:35853:1902845:34501:45875:70317:35308:61171:51447:1902846:1904537:31031:30989:1990801:31991:1902404:1990139:40023:1902002:22:7064:7093:43936:1900182:30071:1902424:31536:6913:90561:7052:1902440:1990942:7059:31115:82:7130:1902850:920:31534:30448:1990820:10971:51446:1904519:7017:18107:31116:4…
7059	chromosome segregation	19 out of 504 genes, 3.8%	96 out of 10340 background genes, 0.9%	0.00016	0	mipA:cdc20:AN10137:plkA:AN2128:AN2862:AN2963:AN2969:AN3067:AN3124:sldA:nimX:kipB:cdcA:top2:smcB:klpA:sudA:bimD	6325:1905412:742:45819:51229:7019:71470:706:10898:71168:45004:1990802:60303:10570:35082:1905168:10571:30307:33314:743:43935:31578:6297:44878:35853:6303:1902845:34501:45875:70317:35308:61171:51447:1902846:1904537:31031:30989:1990801:1990139:1902002:22:72370:7064:7093:43936:1900182:30071:1902424:31536:90561:6284:1902440:70914:1990942:6265:7059:82:10964:7076:2000817:7130:31573:1902850:31145:920:3153…
8152	metabolic process	254 out of 504 genes, 50.4%	4092 out of 10340 background genes, 39.6%	0.00034	0	AN0050:AN0051:AN0052:AN0077:AN0174:AN0179:pdiB:AN0259:AN0278:CYP680A1:AN0357:AN0433:AN0445:aldA:AN0570:AN0579:AN0593:manA:spdA:AN0746:AN0776:mns1B:cdc20:AN0862:lamB:AN0905:niaD:ureB:AN1013:AN10146:AN10223:AN10258:AN10351:AN10395:AN10399:AN10416:AN10602:AN10621:AN1063:AN10681:AN10700:AN10702:AN10710:riboG:AN10795:AN10872:AN10981:AN1103:AN11054:AN11111:phenA:AN1122:AN1131:AN11419:AN1142:AN11778:AN1…	32:1902426:43171:45991:31589:6429:6227:6116:6325:42766:42254:1905412:45461:1900101:30968:45329:1901919:6233:45819:6725:9082:51229:9108:6662:6091:6071:6527:71470:706:30466:10898:71168:45004:31662:33168:90529:1990802:60303:1902114:10570:23:6098:96:8202:46835:1905168:10571:9405:30307:33314:6012:2143:43935:723:5987:6297:6631:6337:31086:447:2182:6348:42128:44878:6537:35853:7021:6303:87:1902845:6540:34…
44699	single-organism process	201 out of 504 genes, 39.9%	3072 out of 10340 background genes, 29.7%	0.00043	0	AN0050:AN0051:AN0077:AN0163:AN0174:pdiB:AN0259:CYP680A1:AN0357:ureA:aldA:AN0579:AN0593:manA:mipA:spdA:mns1B:cdc20:niaD:rcyA:AN10078:ureB:AN10137:AN10146:AN10223:AN10602:AN10621:AN10700:AN10702:AN10710:riboG:AN10743:AN10795:AN10905:AN10981:teaC:AN1103:AN11054:AN11111:phenA:AN1131:AN1142:AN1154:AN11778:AN11853:AN11981:acdA:AN12408:AN1271:AN1455:cysF:rsdA:plkA:oliC:enaB:AN1689:AN1851:acuF:AN1956:agd…	32:32889:15908:45991:31589:55085:6429:6227:6116:6325:42766:1905412:45461:742:1900101:51666:30968:45329:6233:45819:44774:9082:32220:51229:7019:9108:917:6662:6091:6071:31929:6527:32995:71470:34198:706:90295:30466:10898:71168:45004:31662:33168:90529:1990802:15848:1903477:60303:1902114:10570:23:6098:96:8202:46835:35082:1905168:10571:9405:30307:33314:71963:6012:743:43935:15840:723:31578:5987:6297:6631…
7051	spindle organization	11 out of 504 genes, 2.2%	37 out of 10340 background genes, 0.4%	0.00103	0	mipA:AN10137:plkA:AN2128:AN2686:AN2862:AN3124:nimX:cdcA:klpA:bimB	742:45819:51229:7019:71470:706:10898:1990802:60303:10570:1905168:10571:30307:743:31578:44878:35853:1902845:34501:45875:70317:35308:61171:51447:1902846:1904537:31031:30989:1990801:1990139:1902002:22:7064:7093:43936:1900182:30071:1902424:31536:90561:7052:1902440:1990942:7059:82:7130:920:31534:30448:1990820:10971:51446:1904519:18107:31116:45736:1990975:7020:278:7070:1990735:7026:45931:6974:45944:724…
[truncated: 179 more rows]
