# Supplementary material for: Transcriptome-Based Modeling Reveals that Oxidative Stress Induces Modulation of the AtfA-Dependent Signaling Networks in Aspergillus nidulans
Source: Int J Genomics. 2017 Jul 9;2017:6923849. doi: 10.1155/2017/6923849 (PMC5523550; doi:10.1155/2017/6923849)
Supplement: Supplementary file 5 [file 6923849.f5.xls]

## Sheet: Suppl Table 5
Supplementary Table 5			Microarray data of genes belonging to selected gene groups.
			Up- and down-regulated genes are marked with red and blue colors, respectively.
Ribosome biogenesis genes				Microarray data (log2 R)
				Control strain			DatfA mutant
Gene ID	Gene name	GO term		MSB	tBOOH	Diamide	MSB	tBOOH	Diamide
AN0074		ribosomal large subunit biogenesis		-0.78673	-3.00441	-3.1088	-2.9417	-4.05494	-3.74117
AN0092		rRNA processing		0.0709134	-2.50935	-1.1596	-2.87836	-4.36328	-2.69938
AN0124	rio2	maturation of SSU-rRNA from tricistronic rRNA transcript (SSU-rRNA, 5.8S rRNA, LSU-rRNA)		-0.819705	-1.36085	1.64505	-1.03291	-3.24	0.632771
AN0133		maturation of SSU-rRNA from tricistronic rRNA transcript (SSU-rRNA, 5.8S rRNA, LSU-rRNA)		-0.708082	-1.54321	-0.512063	-1.48834	-1.64355	-0.570241
AN0189		rRNA processing		-0.562388	-1.33021	-1.52576	-0.837951	-1.65087	-1.60738
AN0237		maturation of LSU-rRNA from tricistronic rRNA transcript (SSU-rRNA, 5.8S rRNA, LSU-rRNA)		-0.824689	-1.71584	-2.28214	-1.78707	-2.90168	-3.06885
AN0247		ribosomal small subunit biogenesis		-0.56854	-2.87612	-2.26562	-2.57441	-4.15191	-3.29958
AN0262		ribosomal large subunit assembly		-3.21617	-3.2208	-0.32881	-1.48494	-3.30536	-0.181965
AN0305		endonucleolytic cleavage in ITS1 to separate SSU-rRNA from 5.8S rRNA and LSU-rRNA from tricistronic rRNA transcript (SSU-rRNA, 5.8S rRNA, LSU-rRNA)		-0.294289	-2.81853	-1.60758	-2.48319	-3.75433	-2.95137
AN0327		rRNA processing		-1.57496	-0.735179	0.38345	-0.831008	-0.955715	0.418711
AN0410	bimG	rRNA processing		0.376805	0.231847	1.30514	-0.489057	0.367895	1.39494
AN0421		endonucleolytic cleavage in ITS1 to separate SSU-rRNA from 5.8S rRNA and LSU-rRNA from tricistronic rRNA transcript (SSU-rRNA, 5.8S rRNA, LSU-rRNA)		0.272066	-2.75785	-3.8914	-2.10358	-3.33726	-3.18908
AN0465		maturation of SSU-rRNA from tricistronic rRNA transcript (SSU-rRNA, 5.8S rRNA, LSU-rRNA)		-2.91822	-2.45014	-1.04435	-1.5153	-2.72755	-0.509208
AN0475		endonucleolytic cleavage in ITS1 to separate SSU-rRNA from 5.8S rRNA and LSU-rRNA from tricistronic rRNA transcript (SSU-rRNA, 5.8S rRNA, LSU-rRNA)		0.0318399	-2.2536	-2.06727	-1.89211	-2.83594	-3.06642
AN0647		ribosomal small subunit biogenesis		-0.444891	-3.03464	-2.6888	-2.72743	-4.51193	-3.1068
AN0685		rRNA base methylation		0.235853	0.221361	0.120577	0.0457576	0.229144	0.411581
AN0695		rRNA pseudouridine synthesis		-0.936947	-3.73543	-1.99536	-2.55155	-4.77811	-1.72161
AN0707		rRNA processing		0.00607481	0.149677	-1.6495	-0.492735	0.572775	-0.190715
AN0728		ribosome biogenesis		-0.199524	-1.54433	-1.65692	-1.21411	-1.22891	-1.38016
AN0745		tRNA processing		-1.13417	-3.65832	-2.2268	-2.79266	-5.08577	-2.67027
AN0767		maturation of SSU-rRNA		0.136429	-0.0134021	0.840389	-0.394872	-0.284846	0.0696455
AN0796		rRNA processing		1.26458	-1.75472	0.405776	-2.1744	-2.95431	-1.13175
AN0843		rRNA export from nucleus		-2.69428	-2.64405	-1.46906	-1.95483	-2.28376	-0.802506
AN0946		ribosomal large subunit biogenesis		0.107536	-1.68636	-1.36423	-2.32062	-2.70699	-2.1051
AN10058		ribosomal large subunit assembly		-0.6311	-2.07603	0.23282	-2.24413	-3.14401	-0.437383
AN1013		ribosomal large subunit assembly		-2.40364	-2.37155	-0.4975	-0.739868	-2.19548	-0.0170654
AN10175		ribosome biogenesis		-0.84749	-0.351185	0.498981	-0.300406	-1.07745	0.267592
AN10200	rpf2	ribosomal large subunit biogenesis		-0.578091	-3.25647	-2.40691	-3.02523	-4.89105	-2.69739
AN10348		exonucleolytic trimming to generate mature 3'-end of 5.8S rRNA from tricistronic rRNA transcript (SSU-rRNA, 5.8S rRNA, LSU-rRNA)		1.36651	0.326479	0.955812	0.0709505	0.0500295	0.541924
AN10352		rRNA processing		-0.80876	-3.14274	-2.57808	-3.05717	-4.746	-3.12109
AN10618		ribosomal small subunit export from nucleus		0.0455944	-2.02155	-0.704548	-2.17518	-2.42081	-0.413878
AN10712		ribosome biogenesis		-1.32233	-3.25537	-2.50694	-2.39136	-3.44339	-2.38249
AN10719		maturation of SSU-rRNA		0.105035	-0.161082	1.55865	-0.0750532	0.414796	1.72891
AN10721		maturation of LSU-rRNA		0.341449	-0.426609	1.18964	-1.114	-1.49811	-0.387587
AN10865		endonucleolytic cleavage in ITS1 to separate SSU-rRNA from 5.8S rRNA and LSU-rRNA from tricistronic rRNA transcript (SSU-rRNA, 5.8S rRNA, LSU-rRNA)		1.18476	-0.626128	1.60378	-0.61453	-1.77487	0.15879
AN10940		rRNA methylation		0.231647	-0.663703	-1.19679	-0.543153	-0.57454	-0.668091
AN10943		ribosomal large subunit export from nucleus		0.393497	-1.98366	-0.6443	-3.03056	-4.31424	-2.15544
AN10955		rRNA processing		-0.760441	-1.35888	0.0954415	-1.674	-2.0904	-0.43827
AN11145	cgrA	rRNA processing		-0.871135	-2.23601	-1.49694	-2.87128	-2.98661	-3.00339
AN11224		endonucleolytic cleavage involved in rRNA processing		0.379693	0.0911841	0.29778	-0.891152	-0.0161	0.149077
AN11250		exonucleolytic trimming to generate mature 3'-end of 5.8S rRNA from tricistronic rRNA transcript (SSU-rRNA, 5.8S rRNA, LSU-rRNA)		0.5842	-0.576057	1.23449	-1.75055	-1.2118	-0.271138
AN1166		ribosomal large subunit assembly		-2.79817	-2.77767	-1.06792	-1.56062	-2.61062	-0.760616
AN1175		rRNA processing		-0.000924711	-1.05372	-1.43727	-1.59335	-1.7906	-2.04395
AN11773		exonucleolytic trimming to generate mature 3'-end of 5.8S rRNA from tricistronic rRNA transcript (SSU-rRNA, 5.8S rRNA, LSU-rRNA)		-0.523992	-2.54137	-2.46432	-2.19002	-4.1611	-3.55126
AN11929		ribosomal small subunit assembly		-0.129841	-1.65437	0.0736972	-1.55419	-2.6246	-1.08064
AN1200		ribosomal large subunit assembly		0.361414	-1.90586	-2.21218	-2.22853	-2.72958	-2.75431
AN1215		ribosomal large subunit export from nucleus		-0.509558	-2.37414	-1.33833	-2.71906	-1.79569	-1.93481
AN1228		maturation of LSU-rRNA from tricistronic rRNA transcript (SSU-rRNA, 5.8S rRNA, LSU-rRNA)		-2.74719	-2.55074	-1.05	-1.68471	-2.28772	-0.826913
AN12473	hscA	rRNA processing		-1.88958	-3.20106	-1.05872	-2.32142	-4.72398	-0.561745
AN1319		maturation of SSU-rRNA from tricistronic rRNA transcript (SSU-rRNA, 5.8S rRNA, LSU-rRNA)		-0.942738	-2.71948	-0.610222	-1.64167	-2.2692	-0.215976
AN1345		maturation of SSU-rRNA from tricistronic rRNA transcript (SSU-rRNA, 5.8S rRNA, LSU-rRNA)		-2.62041	-2.14248	-0.830588	-1.44927	-2.69934	-0.425183
AN1367	bop1	ribosomal large subunit biogenesis		-0.6406	-3.32	-2.45667	-2.43359	-3.51709	-3.00989
AN1434		endonucleolytic cleavage in ITS1 to separate SSU-rRNA from 5.8S rRNA and LSU-rRNA from tricistronic rRNA transcript (SSU-rRNA, 5.8S rRNA, LSU-rRNA)		0.401115	-1.67867	-1.65304	-1.65444	-1.94937	-1.82942
AN1474		ribosome biogenesis		-0.0611417	-1.02722	-0.246297	-1.15154	-1.24716	-0.550764
AN1533		endonucleolytic cleavage in ITS1 to separate SSU-rRNA from 5.8S rRNA and LSU-rRNA from tricistronic rRNA transcript (SSU-rRNA, 5.8S rRNA, LSU-rRNA)		-1.36694	-1.6539	-2.51271	-1.56496	-2.37802	-2.74078
AN1666		ribosomal large subunit export from nucleus		-0.111867	-3.31712	-4.23138	-2.63571	-4.50547	-4.28539
AN1711		ribosomal large subunit export from nucleus		0.539833	-1.18173	-0.378346	-1.91528	-3.47366	-1.97635
AN1875		ribosomal large subunit biogenesis		2.77857	0.769587	0.730188	-0.66606	-0.246903	0.172892
AN1949		maturation of SSU-rRNA from tricistronic rRNA transcript (SSU-rRNA, 5.8S rRNA, LSU-rRNA)		-0.221184	-2.95945	-0.56587	-2.69084	-4.15061	-1.98621
AN1957		rRNA modification		-0.416691	-0.967242	-1.37841	-0.881955	-0.987588	-1.06947
AN1964		maturation of SSU-rRNA from tricistronic rRNA transcript (SSU-rRNA, 5.8S rRNA, LSU-rRNA)		-2.66149	-2.78295	-1.93011	-1.54118	-1.79514	-0.934558
AN2079		maturation of SSU-rRNA from tricistronic rRNA transcript (SSU-rRNA, 5.8S rRNA, LSU-rRNA)		-0.421504	-2.01283	-0.10394	-2.14687	-2.08982	-0.367772
AN2210		ribosomal small subunit export from nucleus		0.153853	-1.51249	-0.344185	-1.30074	-0.811149	0.46124
AN2262		ribosomal small subunit biogenesis		1.36224	-1.2304	-0.778106	-1.32392	-1.7745	-1.90576
AN2263		ribosomal large subunit assembly		1.98819	-0.421006	-1.02929	-0.68281	-1.21783	-2.18707
AN2292		maturation of SSU-rRNA from tricistronic rRNA transcript (SSU-rRNA, 5.8S rRNA, LSU-rRNA)		-0.0485191	-1.74728	-2.24675	-2.38045	-2.82152	-2.60916
AN2437		tRNA processing		-0.652391	-1.11471	0.143248	-0.966023	-1.12059	-0.60485
AN2734		ribosomal large subunit assembly		-2.78956	-2.95643	-0.636142	-1.43568	-2.84024	-0.537533
AN2737	mexA	ribosomal large subunit export from nucleus		2.19472	1.69943	0.836893	0.366365	1.67409	0.868901
AN2759		endonucleolytic cleavage in ITS1 to separate SSU-rRNA from 5.8S rRNA and LSU-rRNA from tricistronic rRNA transcript (SSU-rRNA, 5.8S rRNA, LSU-rRNA)		0.08513	-0.613516	-0.640207	-1.05389	-1.65623	-1.04771
AN2926	nsa2	maturation of LSU-rRNA from tricistronic rRNA transcript (SSU-rRNA, 5.8S rRNA, LSU-rRNA)		-0.633016	-2.62799	-1.45583	-2.39868	-3.51385	-2.31219
AN3056		maturation of SSU-rRNA		-0.665042	-2.43227	-2.00067	-1.62231	-3.04893	-2.3363
AN3096	rmtB	ribosome biogenesis		-0.443668	-2.16872	-0.926582	-0.657575	-3.8692	-1.65907
AN3167	nop58	endonucleolytic cleavage in 5'-ETS of tricistronic rRNA transcript (SSU-rRNA, 5.8S rRNA, LSU-rRNA)		-0.803725	-3.05372	-2.21491	-2.4962	-3.98088	-2.34137
AN3172		ribosomal small subunit assembly		-3.31677	-3.10327	-1.5696	-1.90942	-2.32511	-0.586288
AN3313		rRNA modification		-0.686816	-2.22653	-2.68075	-1.7389	-2.90407	-2.55047
AN3413		rRNA export from nucleus		-3.0608	-2.73798	-1.47672	-1.97469	-2.41854	-0.9079
AN3455		rRNA processing		0.2394	0.161938	-0.884455	-1.51603	-0.391748	-2.036
AN3657		exonucleolytic trimming to generate mature 3'-end of 5.8S rRNA from tricistronic rRNA transcript (SSU-rRNA, 5.8S rRNA, LSU-rRNA)		-0.452779	-0.984371	-0.418505	-0.640065	-0.87218	-0.230236
AN3706		rRNA export from nucleus		-3.26913	-3.30306	-0.911248	-1.88091	-2.99752	-0.352301
AN3745	rrs1	ribosomal large subunit export from nucleus		-0.544175	-3.43385	-3.04524	-3.01155	-4.15924	-3.39922
AN3812		exonucleolytic trimming to generate mature 3'-end of 5.8S rRNA from tricistronic rRNA transcript (SSU-rRNA, 5.8S rRNA, LSU-rRNA)		-0.703116	-0.914568	-1.50759	-1.10967	-1.80171	-1.61088
AN3823		endonucleolytic cleavage in ITS1 to separate SSU-rRNA from 5.8S rRNA and LSU-rRNA from tricistronic rRNA transcript (SSU-rRNA, 5.8S rRNA, LSU-rRNA)		-2.45224	-1.64294	-0.305398	-0.813049	-1.65923	0.21655
AN3827		ribosome biogenesis		-0.597113	-3.79209	-2.60444	-3.09928	-5.05095	-3.47511
AN4060	rps16	ribosomal small subunit biogenesis		-2.85701	-3.05285	-1.25283	-1.77168	-2.85194	-0.668548
AN4087		ribosomal small subunit export from nucleus		-2.74527	-2.335	-0.47972	-0.918503	-2.40434	-0.151133
AN4226		maturation of SSU-rRNA from tricistronic rRNA transcript (SSU-rRNA, 5.8S rRNA, LSU-rRNA)		-0.24512	-1.34238	-1.60485	-1.2572	-1.25508	-1.46964
AN4232		ribosomal large subunit assembly		0.0481685	-2.44629	-2.54094	-2.41907	-3.95833	-3.69436
AN4298		endonucleolytic cleavage in ITS1 to separate SSU-rRNA from 5.8S rRNA and LSU-rRNA from tricistronic rRNA transcript (SSU-rRNA, 5.8S rRNA, LSU-rRNA)		0.204266	-2.34261	-2.57076	-2.7758	-4.31933	-3.04712
AN4419		ribosomal large subunit assembly		0.107179	2.2445	0.408009	0.173448	1.90109	0.13117
AN4460		rRNA processing		-0.755983	-2.83697	-3.20999	-1.40286	-1.77324	-3.35761
AN4469		ribosomal large subunit biogenesis		-0.498363	-2.61559	-0.0145924	-2.31617	-2.71133	-0.52175
AN4471		ribosomal large subunit assembly		-0.335434	-2.17577	-0.676184	-2.64105	-3.82216	-1.86501
AN4475		ribosomal large subunit assembly		-3.01821	-2.99553	-0.360955	-1.29102	-3.18969	-0.229048
AN4560		ribosomal large subunit biogenesis		-0.597598	-2.25621	-0.762877	-2.30272	-2.76138	-1.54928
AN4594		maturation of SSU-rRNA from tricistronic rRNA transcript (SSU-rRNA, 5.8S rRNA, LSU-rRNA)		-3.62695	-3.74864	-0.682406	-1.48126	-4.55231	-0.623109
AN4599		cleavage in ITS2 between 5.8S rRNA and LSU-rRNA of tricistronic rRNA transcript (SSU-rRNA, 5.8S rRNA, LSU-rRNA)		-0.341711	-0.742934	-0.322495	-0.677712	-0.548281	-0.171825
AN4616	ssz1	rRNA processing		-0.624736	-2.78541	-1.28749	-2.32729	-3.16132	-0.423141
AN4648		rRNA processing		-0.444	-2.65835	-2.61748	-2.43329	-3.20508	-2.73413
AN4771		ribosomal large subunit assembly		-0.272373	-1.84644	-2.748	-1.6396	-2.8075	-3.08341
AN4777		ribosomal small subunit assembly		-1.41923	-0.997409	0.0287281	-1.11563	-0.708852	0.26499
AN4803		maturation of SSU-rRNA from tricistronic rRNA transcript (SSU-rRNA, 5.8S rRNA, LSU-rRNA)		-3.10915	-2.86525	-1.11641	-1.01731	-2.21757	-0.358922
AN4872	ubi1	ribosomal small subunit assembly		-2.34792	-2.11765	-0.250643	-1.16334	-1.82151	0.123553
AN4916		ribosome biogenesis		-2.9435	-2.39644	-1.73624	-1.32302	-1.67557	-0.692208
AN5013		exonucleolytic trimming to generate mature 3'-end of 5.8S rRNA from tricistronic rRNA transcript (SSU-rRNA, 5.8S rRNA, LSU-rRNA)		0.40534	0.107515	-0.607492	0.233192	-0.1622	-0.11352
AN5177		ribosomal large subunit biogenesis		-2.96517	-2.32694	-3.23042	-0.64149	-1.8349	-1.97144
AN5222		ribosomal small subunit assembly		-3.02685	-3.00058	-1.07269	-1.42081	-2.90442	-0.776653
AN5340		endonucleolytic cleavage in ITS1 to separate SSU-rRNA from 5.8S rRNA and LSU-rRNA from tricistronic rRNA transcript (SSU-rRNA, 5.8S rRNA, LSU-rRNA)		0.367287	-2.22825	-2.54504	-2.63698	-3.34906	-2.9848
AN5441		rRNA export from nucleus		-2.85865	-2.70683	-0.845287	-1.21165	-2.9622	-0.584338
AN5443		mature ribosome assembly		0.368968	-0.264545	-1.18095	-0.650021	-0.182974	-1.25529
AN5455		endonucleolytic cleavage in ITS1 to separate SSU-rRNA from 5.8S rRNA and LSU-rRNA from tricistronic rRNA transcript (SSU-rRNA, 5.8S rRNA, LSU-rRNA)		-0.241424	-1.45353	-1.57714	-0.957012	-0.869315	-0.833962
AN5520		maturation of LSU-rRNA		-3.1202	-3.48265	-1.41898	-1.24173	-2.77137	-0.451386
AN5702		ribosomal large subunit biogenesis		-0.606023	-3.12198	-1.71342	-2.1101	-3.48917	-1.50537
AN5711		maturation of SSU-rRNA		0.250147	-0.497857	-1.2292	-0.732806	-0.763786	-1.20264
AN5715		rRNA export from nucleus		-2.85867	-2.20134	-0.547424	-1.29954	-1.98849	-0.190951
AN5785		endonucleolytic cleavage in ITS1 to separate SSU-rRNA from 5.8S rRNA and LSU-rRNA from tricistronic rRNA transcript (SSU-rRNA, 5.8S rRNA, LSU-rRNA)		0.0121994	-1.8959	-1.09439	-1.74421	-3.89673	-2.18755
AN5789		ribosomal small subunit export from nucleus		-0.608606	-2.49865	-2.29343	-2.27696	-3.771	-1.94211
AN5865		ribosomal subunit export from nucleus		-0.267439	-2.63762	-3.39397	-2.49424	-3.11696	-2.87396
AN5871		rRNA methylation		0.284397	-2.10657	-2.00833	-2.21281	-3.26994	-3.17371
AN5875		endonucleolytic cleavage in ITS1 to separate SSU-rRNA from 5.8S rRNA and LSU-rRNA from tricistronic rRNA transcript (SSU-rRNA, 5.8S rRNA, LSU-rRNA)		-0.334834	-1.96774	0.104352	-1.38319	-1.71172	0.21045
AN5910		rRNA processing		-1.13882	-0.855172	-2.93111	-0.251364	-0.181761	-1.26503
AN5960		ribosomal small subunit assembly		-2.59832	-2.91745	-0.993241	-1.43514	-2.09926	-0.4365
AN5979		ribosomal small subunit assembly		-2.91801	-2.31311	-0.267937	-1.06962	-2.63714	-0.209855
AN5997		rRNA export from nucleus		-2.96224	-2.27256	-0.672251	-1.19896	-2.70742	-0.450081
AN6067		mature ribosome assembly		0.427101	-1.16262	-2.57469	-1.37923	-1.79402	-3.02211
AN6082		rRNA processing		-1.28562	-1.30056	0.335659	-0.797021	-1.51163	0.285429
AN6083		ribosomal large subunit assembly		0.139948	-0.211315	0.310783	0.727979	0.0883221	0.464146
AN6112	dnfB	ribosomal small subunit assembly		-0.624385	0.475584	0.360203	-0.14163	0.775906	0.859035
AN6149		mitochondrial large ribosomal subunit assembly		0.731919	-1.83706	-0.0437198	-0.826909	-1.12747	0.181558
AN6171		ribosomal small subunit biogenesis		-0.886495	-3.48901	-2.02301	-2.30091	-4.43237	-2.31416
AN6202	rpl3	ribosomal large subunit assembly		-3.46818	-2.77512	-0.87634	-0.698758	-2.41595	-0.346151
AN6244		exonucleolytic trimming to generate mature 3'-end of 5.8S rRNA from tricistronic rRNA transcript (SSU-rRNA, 5.8S rRNA, LSU-rRNA)		-0.544739	-0.900513	-0.130583	-1.56413	-1.20433	0.110802
AN6265		endonucleolytic cleavage in ITS1 to separate SSU-rRNA from 5.8S rRNA and LSU-rRNA from tricistronic rRNA transcript (SSU-rRNA, 5.8S rRNA, LSU-rRNA)		0.586849	-1.32389	-1.36825	-1.87704	-2.54873	-2.1671
AN6266		ribosome biogenesis		-0.663569	-3.39841	-0.526165	-1.84436	-4.06026	-0.500668
AN6310		ribosomal large subunit assembly		-1.16908	-3.06446	-2.52155	-2.21557	-4.00977	-3.55862
AN6334		ribosome biogenesis		-0.131351	-1.9338	-0.050679	-1.67376	-1.76182	0.270563
AN6374		maturation of LSU-rRNA from tricistronic rRNA transcript (SSU-rRNA, 5.8S rRNA, LSU-rRNA)		-0.367638	-2.46914	-1.02452	-2.57594	-3.78031	-2.24516
AN6514		maturation of LSU-rRNA from tricistronic rRNA transcript (SSU-rRNA, 5.8S rRNA, LSU-rRNA)		0.387	0.631401	0.0506288	-0.0520305	0.288189	0.0163952
AN6556		endonucleolytic cleavage in ITS1 to separate SSU-rRNA from 5.8S rRNA and LSU-rRNA from tricistronic rRNA transcript (SSU-rRNA, 5.8S rRNA, LSU-rRNA)		-1.57861	-3.859	-2.86122	-2.73541	-4.89362	-3.19303
AN6561		maturation of SSU-rRNA from tricistronic rRNA transcript (SSU-rRNA, 5.8S rRNA, LSU-rRNA)		0.424803	-0.578601	-0.896195	-1.63841	-1.40919	-1.24089
AN6563		ribosome biogenesis		-2.25506	-2.67381	-1.47184	-1.179	-2.61179	-0.735355
AN6585		maturation of SSU-rRNA from tricistronic rRNA transcript (SSU-rRNA, 5.8S rRNA, LSU-rRNA)		-0.422401	-2.17524	-2.39552	-1.30111	-1.82802	-1.8587
AN6612		maturation of LSU-rRNA from tricistronic rRNA transcript (SSU-rRNA, 5.8S rRNA, LSU-rRNA)		-0.154723	-3.0708	-2.60748	-2.87381	-4.67799	-3.92196
AN6632		ribosomal small subunit assembly		-2.84115	-2.941	-0.878133	-1.44588	-3.13089	-0.686224
AN6651		ribosomal small subunit biogenesis		0.780159	-1.70078	-3.72783	-1.665	-0.757824	-3.14004
AN6679		maturation of SSU-rRNA from tricistronic rRNA transcript (SSU-rRNA, 5.8S rRNA, LSU-rRNA)		-2.90802	-2.00651	-0.306613	-1.70549	-2.32505	-0.0772752
AN6902		ribosomal large subunit assembly		-0.673211	-3.49981	-4.01404	-2.73416	-4.6115	-4.07888
AN6978	rcc1	ribosomal subunit export from nucleus		-0.717937	-1.46664	-0.959451	-0.979539	-1.31261	-1.18974
AN6980	nic96	ribosomal large subunit export from nucleus		-1.02533	-0.321422	-1.09382	-1.43826	-1.54113	-1.59768
AN7205		ribosome biogenesis		-0.16913	-2.64251	-1.20917	-2.54077	-4.30418	-1.98033
AN7260		rRNA processing		-0.286838	-2.81369	-1.96534	-1.78877	-3.28084	-2.50114
AN7305		endonucleolytic cleavage in ITS1 to separate SSU-rRNA from 5.8S rRNA and LSU-rRNA from tricistronic rRNA transcript (SSU-rRNA, 5.8S rRNA, LSU-rRNA)		-1.11044	-2.00284	0.373387	-2.00126	-2.50831	0.228929
AN7424		endonucleolytic cleavage in ITS1 upstream of 5.8S rRNA from tricistronic rRNA transcript (SSU-rRNA, 5.8S rRNA, LSU-rRNA)		0.947342	-0.591241	0.416919	-2.69868	-1.54586	-0.0734848
AN7526		maturation of SSU-rRNA from tricistronic rRNA transcript (SSU-rRNA, 5.8S rRNA, LSU-rRNA)		-0.157747	-2.50482	-2.6814	-2.12721	-2.86412	-2.6534
AN7630		ribosomal large subunit assembly		1.62438	-0.346922	1.06123	-0.659368	-1.59802	0.535277
AN7674		ribosomal large subunit biogenesis		0.0517327	-2.3637	0.0726747	-2.75562	-4.27551	-2.34758
AN8073		rRNA processing		-0.654058	-3.5178	-0.390707	-2.33166	-4.07448	-0.621036
AN8247		maturation of LSU-rRNA from tricistronic rRNA transcript (SSU-rRNA, 5.8S rRNA, LSU-rRNA)		0.191317	-2.60954	-1.2775	-2.28263	-3.27972	-2.11527
AN8254	nop10	cleavage involved in rRNA processing		-0.702366	-2.97671	-0.916183	-2.62154	-3.85086	-1.99664
AN8293		rRNA processing		-0.317223	-1.41762	-1.01469	-1.66167	-1.98241	-0.790176
AN8491		maturation of LSU-rRNA from tricistronic rRNA transcript (SSU-rRNA, 5.8S rRNA, LSU-rRNA)		-0.349598	-3.03972	-1.77315	-2.73846	-4.32403	-2.61368
AN8668		ribosomal large subunit assembly		-0.256889	-0.583723	-0.545314	-0.794091	-0.520729	-0.665014
AN8671		rRNA processing		-0.966898	-0.379979	-1.29613	-0.627733	-0.248502	-0.706581
AN8691		rRNA processing		-0.233394	0.015158	1.18138	-0.121454	0.896557	1.19097
AN8805		ribosomal small subunit export from nucleus		-0.0797291	-0.180928	0.0190309	-0.0363481	-0.213153	-0.00301075
AN8824		ribosomal subunit export from nucleus		-0.195013	1.14585	0.316585	-0.622278	1.08481	-0.0574176
AN8834		ribosomal large subunit assembly		0.20034	-1.53997	-1.51937	-1.66315	-2.18114	-1.84578
AN8849		rRNA base methylation		-0.905483	-0.30706	0.497856	-1.05081	-0.523743	-0.000211434
AN8851	swoC	rRNA pseudouridine synthesis		-1.19888	-3.37715	-1.92107	-2.90922	-5.04669	-2.87709
AN8856		ribosomal large subunit assembly		-2.63544	-1.82233	-0.718107	-1.14285	-1.44891	-0.534746
AN8860		maturation of SSU-rRNA from tricistronic rRNA transcript (SSU-rRNA, 5.8S rRNA, LSU-rRNA)		-0.222612	-0.512019	0.100701	-0.622112	-2.03346	-0.29627
AN8870		maturation of SSU-rRNA from tricistronic rRNA transcript (SSU-rRNA, 5.8S rRNA, LSU-rRNA)		-2.64829	-2.0338	-0.0918351	-1.39517	-2.46247	-0.0994845
AN9060		ribosomal large subunit export from nucleus		0.996965	0.50131	0.325428	0.149142	0.0191905	-0.208712
AN9097		maturation of SSU-rRNA from tricistronic rRNA transcript (SSU-rRNA, 5.8S rRNA, LSU-rRNA)		-2.30534	-2.32274	-0.809952	-1.33152	-2.5117	-0.652813
AN9398		endonucleolytic cleavage in ITS1 to separate SSU-rRNA from 5.8S rRNA and LSU-rRNA from tricistronic rRNA transcript (SSU-rRNA, 5.8S rRNA, LSU-rRNA)		0.495176	-2.05621	-0.728882	-2.72102	-3.84914	-1.89843
AN9468		maturation of SSU-rRNA from tricistronic rRNA transcript (SSU-rRNA, 5.8S rRNA, LSU-rRNA)		-2.98665	-2.64953	-0.671317	-1.18593	-2.56496	-0.24442
	Frequency in the up-regulated gene group:			3/636	2/686	0/493	0/546	0/504	0/449
	Background frequency			177/10390
	Significant enrichment in the studied gene group in compare to the background frequency (Fisher's exact test, p<0.05):
				NO	NO	NO	NO	NO	NO
	Significant difference between the DatfA and the appropriate control strain (Fisher's exact test, p<0.05):
							NO	NO	NO
	Frequency in the down-regulated gene group:			36/653	110/645	30/357	106/557	99/638	46/525
	Background frequency			177/10390
	Significant enrichment in the studied gene group in compare to the background frequency (Fisher's exact test, p<0.05):
				YES	YES	YES	YES	YES	YES
	Significant difference between the DatfA and the appropriate control strain (Fisher's exact test, p<0.05):
							YES	NO	NO
Mitotic cell cycle genes				Microarray data (log2 R)
				Control strain			DatfA mutant
Gene ID	Gene name	GO term		MSB	tBOOH	Diamide	MSB	tBOOH	Diamide
AN0084		G1/S transition of mitotic cell cycle		-0.459221	-0.770289	0.263204	-0.430242	-1.03623	0.310216
AN0091		intra-S DNA damage checkpoint		1.80647	0.505875	1.43794	-0.256074	0.743028	0.976135
AN0118	nudA	mitotic sister chromatid segregation		-1.59635	-0.734861	-0.62868	-0.377922	0.00927136	0.027402
AN0135		mitotic actomyosin contractile ring assembly		0.813409	0.772024	-1.31359	1.16575	0.533107	-0.862075
AN0140		mitotic actomyosin contractile ring assembly		-0.819993	-0.195031	-0.453573	0.0784026	0.0813414	0.232972
AN0143		mitotic spindle organization in nucleus		-0.66159	-0.4667	0.124104	0.0936331	0.0346521	-0.238677
AN0166		attachment of mitotic spindle microtubules to kinetochore		-1.80431	-1.30361	0.177744	-0.714163	-1.20003	-0.264098
AN0226		G2/M transition of mitotic cell cycle		3.0385	2.28198	1.9529	1.45139	1.64907	1.65123
AN0228		mitotic DNA replication		-3.32694	-2.42693	-4.60447	-2.07405	-1.8958	-3.20782
AN0253	top1	mitotic chromosome condensation		0.518939	0.938091	-0.493477	0.369646	1.02203	0.0583253
AN0270		cellular bud site selection		-1.61364	0.694324	0.695887	0.36831	0.595783	0.958953
AN0281	bubA	mitotic spindle assembly checkpoint		0.629857	0.0862606	1.96529	0.0600435	0.686588	2.14495
AN0290		mitotic actomyosin contractile ring contraction		-1.44067	0.20948	0.705168	-0.0338488	0.284764	0.740936
AN0295		mitotic spindle disassembly		0.225726	1.7917	2.7305	-0.205888	1.88566	3.10516
AN0347	rabE	mitotic cytokinesis		-0.854517	-0.324055	1.26222	-0.657867	-0.994624	0.795202
AN0410	bimG	mitotic spindle elongation		0.376805	0.231847	1.30514	-0.489057	0.367895	1.39494
AN0420	nudG	establishment of mitotic spindle localization		-1.88997	-1.28718	0.344386	-1.35169	-1.06246	0.187915
AN0504	sitA	G1/S transition of mitotic cell cycle		0.177824	-0.130761	-1.1542	0.657038	-0.316144	-0.779396
AN0556	mreA	intra-S DNA damage checkpoint		1.10122	2.21094	1.15091	0.443391	2.07273	0.812276
AN0676	mipA	mitotic cytokinesis, site selection		-2.3909	-1.02194	-1.83511	-0.98533	-1.18856	-1.24712
AN0696	mad1	mitotic spindle assembly checkpoint		0.141156	1.02962	-0.290644	-0.206581	0.740951	-0.0830582
AN0733	hhtA	mitotic spindle assembly checkpoint		-0.59415	-0.539364	-1.25971	-0.145538	0.121468	-0.8802
AN0808	swd1	G2/M transition of mitotic cell cycle		-0.775868	-0.710535	-0.991738	-0.928398	-0.610546	-0.630396
AN0814	cdc20	mitotic sister chromatid segregation		-4.30124	-4.41727	-1.78485	-0.523938	-3.05817	-0.401365
AN0872		mitotic DNA replication preinitiation complex assembly		-0.975172	-0.889924	-2.28239	-1.2253	-0.675129	-2.46156
AN0960		mitotic spindle organization		0.150869	0.976027	-0.559848	-0.674195	0.88741	-0.422973
AN10008	culD	mitotic sister chromatid segregation		0.0629415	1.13361	-0.154011	0.766204	0.173989	-0.179984
AN10111		mitotic spindle organization in nucleus		0.830909	-0.104055	2.15606	0.358626	-1.193	1.41963
AN10137		mitotic sister chromatid segregation		-3.36026	-2.70428	-1.74594	-1.07008	-3.49355	-1.93697
AN10225		mitotic sister chromatid segregation		-1.66431	-1.6702	-2.89038	-1.07939	-1.5787	-3.126
AN10253		mitotic sister chromatid cohesion		-0.210946	-0.626689	-0.132704	-0.118806	0.169835	0.314957
AN1026		mitotic spindle organization in nucleus		-0.316402	-0.882263	-0.0341748	0.263144	-0.345142	-0.162531
AN10336		mitotic chromosome condensation		1.89965	1.59825	-1.24719	0.536818	1.27453	-1.28094
AN10516	grrA	G1/S transition of mitotic cell cycle		0.690413	0.255861	-0.591036	0.151933	0.306079	-0.852257
AN10635	sepB	Okazaki fragment processing involved in mitotic DNA replication		-0.966302	-0.61808	-1.44503	-0.972646	-0.622527	-1.27985
AN10755		mitotic DNA replication initiation		-2.98073	-1.59292	-2.8464	-1.51532	-0.6407	-2.1535
AN10956	esa1	mitotic sister chromatid segregation		1.5808	0.295623	0.231909	-0.0566548	0.279355	0.158132
AN11055		G2/M transition of mitotic cell cycle		0.643391	0.0263034	0.479984	-0.542457	-0.105748	0.494469
AN11059		cellular bud site selection		0.0481772	-0.0343025	-0.0128352	0.012187	-0.168961	0.00848798
AN11071		barrier septum assembly		1.79215	1.34599	1.63555	1.01619	1.25343	2.219
AN11101	gin4	morphogenesis checkpoint		0.186121	0.354891	5.05859	-0.149313	0.131093	3.57681
AN11344		mitotic spindle organization in nucleus		-0.538223	-0.584901	-0.65678	-0.761805	-1.21839	-0.941476
AN1170	clrD	attachment of mitotic spindle microtubules to kinetochore		-0.0701997	-0.575591	-0.549243	-0.295029	-0.269722	-0.44827
AN1171	kin1	mitotic cytokinesis, site selection		-0.297835	-0.00148858	-0.929913	0.85065	0.061659	-0.467926
AN11721		Okazaki fragment processing involved in mitotic DNA replication		-1.10528	-0.200139	-1.39252	-0.511329	0.565309	-0.818013
AN1182	benA	mitotic sister chromatid segregation		-2.98237	-1.049	-0.627796	-1.37365	-0.211869	0.0927865
AN1191	sumO	mitotic sister chromatid segregation		-0.0549582	0.369125	1.20184	0.136576	0.039039	0.88627
AN1207		mitotic DNA replication checkpoint		-0.520728	-0.52898	-1.2076	-1.2293	-0.315512	-1.60821
AN12161		intra-S DNA damage checkpoint		-0.342334	-0.192698	-0.907812	-0.632819	-0.52191	-1.12843
AN1255		mitotic sister chromatid segregation		-0.4717	-0.45337	-0.739133	-0.305517	-0.362344	-0.218234
AN1286		mitotic sister chromatid segregation		-1.6994	-0.896077	-1.76901	-0.668839	0.0858892	-0.813476
AN1324	budA	bipolar cellular bud site selection		-0.0600143	0.258063	0.276845	0.175177	0.365127	0.560758
AN1335		mitotic sister chromatid segregation		-0.201642	0.774548	-0.306451	0.346781	0.517344	-0.270594
AN1394	aspD	mitotic cytokinesis		-3.26325	-1.68669	-1.25114	-1.6117	-1.69437	-0.828001
AN1398		mitotic spindle organization in nucleus		-0.412294	-0.608754	0.334637	-0.538731	-0.591483	-0.0134154
AN1546		regulation of transcription involved in G2/M transition of mitotic cell cycle		0.119515	0.812753	0.361255	-0.0124753	0.994419	0.865501
AN1560	plkA	mitotic spindle elongation		-2.79732	-2.97327	-0.880397	-0.725868	-1.83155	-0.00643168
AN1779	nimO	maintenance of mitotic sister chromatid cohesion, centromeric		-1.38935	-0.38471	-1.15167	-0.395356	-0.14255	0.192113
AN1875		mitotic cell cycle		2.77857	0.769587	0.730188	-0.66606	-0.246903	0.172892
AN1905	hepA	mitotic sister chromatid cohesion		-2.43472	-1.99578	-1.97652	-2.25734	-1.55954	-1.50988
AN1929		G2/M transition of mitotic cell cycle		-1.94482	-1.43967	-3.54716	-0.981208	-0.876348	-2.02443
AN2047	CaM	mitotic spindle assembly		-1.95312	-0.332966	0.479385	-0.153067	-0.14949	0.345621
AN2126		mitotic cytokinesis		-1.79275	0.10781	0.0133008	0.504139	0.294392	0.745117
AN2128		microtubule bundle formation involved in mitotic spindle midzone assembly		-2.77134	-2.39269	-1.1733	-0.909223	-1.11309	0.0574603
AN2143		mitotic sister chromatid cohesion		-0.807143	0.320061	-2.64733	0.0626926	0.493363	-1.08759
AN2246	gcn2	mitotic G1 DNA damage checkpoint		-0.773871	-0.615865	0.28436	0.389733	-0.907021	-0.314529
AN2302	sconC	G1/S transition of mitotic cell cycle		-0.00497051	1.19344	0.221338	0.199669	0.925246	-0.319325
AN2412	cmkA	G2/M transition of mitotic cell cycle		-0.746145	0.600879	-1.16993	0.156033	1.41172	-1.143
AN2417		signal transduction involved in mitotic DNA replication checkpoint		-0.309116	-0.274607	-0.541099	-0.29942	-0.269633	-0.309856
AN2438		establishment of mitotic sister chromatid cohesion		0.867474	0.601863	1.27956	-0.045178	0.591421	0.972519
AN2439	sldB	mitotic spindle assembly checkpoint		0.0759875	-0.223033	0.900813	-0.356181	-0.622736	1.23943
AN2484		mitotic actomyosin contractile ring assembly		-1.22544	0.0117034	0.956071	0.443508	0.273021	0.643611
AN2511	mad2	mitotic spindle assembly checkpoint		-4.39848	-3.25828	-2.29089	-1.28665	-2.85653	-1.16242
AN2686		mitotic spindle organization in nucleus		-2.1746	-1.34202	-1.16687	-0.326205	-1.30687	-0.736278
AN2761		mitotic sister chromatid segregation		-0.213369	0.0646752	0.722209	-0.0323735	-0.0824447	0.508412
AN2764		removal of RNA primer involved in mitotic DNA replication		-0.937208	-0.046243	-0.600693	-1.36676	-0.045834	-0.347166
AN2768		mitotic spindle organization in nucleus		1.72942	0.243444	1.20783	-0.242609	0.662818	1.26057
AN2772	bimE	mitotic nuclear division		-1.32651	-0.887267	-2.31155	-0.266578	0.148742	-0.783437
AN2848		mitotic nuclear division		0.132839	1.13882	1.25159	-0.0554597	1.26756	0.835793
AN2854		positive regulation of transcription involved in G2/M transition of mitotic cell cycle		1.46491	0.373406	2.00479	-0.536079	0.796941	1.71131
AN2862		mitotic sister chromatid cohesion		-2.45647	-1.08703	-1.59053	-0.994097	-0.897444	-0.789638
AN2963		mitotic sister chromatid cohesion		-2.06505	-0.68859	-1.36963	-1.09169	-1.37944	-1.34294
AN2969		mitotic DNA replication checkpoint		-2.26653	-0.46704	0.453391	-1.34081	-0.686033	0.425454
AN3062	pcpA	mitotic sister chromatid segregation		-1.14347	-0.701052	-1.38979	-1.28138	-0.627632	-0.999477
AN3067		mitotic sister chromatid cohesion		-2.84284	-1.19747	-3.72469	-1.29211	-0.61278	-2.52903
AN3118		intra-S DNA damage checkpoint		0.752292	0.112223	0.182829	-0.30636	0.175915	-0.00612419
AN3124		mitotic spindle elongation		-4.33004	-3.43235	-2.60592	-1.05815	-2.35076	-1.15713
AN3154	rgdA	positive regulation of transcription involved in G1/S transition of mitotic cell cycle		-0.930288	-0.23388	-2.65632	-1.19618	0.111526	-2.77426
AN3156		mitotic G1 DNA damage checkpoint		-0.503273	-0.601488	0.389391	-0.866911	-1.32448	0.615724
AN3363	bimC	mitotic spindle midzone assembly		-1.47676	-1.83157	-2.00941	-0.501946	-1.83427	-1.45185
AN3372	scaA	mitotic G2 DNA damage checkpoint		1.34318	1.16704	-1.08139	0.403601	1.20978	-2.10847
AN3373		DNA damage checkpoint		2.33189	2.35893	1.05707	0.915705	1.6813	0.0738388
AN3437	apsB	attachment of mitotic spindle microtubules to kinetochore		-0.060825	-0.689622	-2.57362	-0.634817	-0.486789	-2.38055
AN3450	cdc7	G1/S transition of mitotic cell cycle		0.0354241	-0.457537	0.0483888	-0.168893	-0.778579	-0.108732
AN3451		mitotic chromosome condensation		-1.34862	-1.43496	-1.61373	-0.77892	-2.19101	-1.62074
AN3579		mitotic spindle elongation		0.15862	0.111952	-0.42494	-0.237931	-0.540158	-0.69306
AN3619	sldI	intra-S DNA damage checkpoint		0.860602	1.35703	0.654958	0.700611	0.916022	-0.0398214
AN3620		mitotic G2 DNA damage checkpoint		-1.53472	0.244987	1.2783	-0.588259	1.06201	1.40939
AN3622	rgsB	cellular bud site selection		-0.508949	-0.653146	-0.671367	-0.559807	-0.30044	-0.489157
AN3648	nimE	correction of merotelic kinetochore attachment, mitotic		-1.85414	-1.3727	-2.52902	-0.528006	-0.0501917	-0.791698
AN3666		mitotic DNA replication initiation		-0.26159	0.0926759	1.2424	-0.0365768	0.203504	0.735204
AN3710		attachment of mitotic spindle microtubules to kinetochore		0.326777	0.227637	2.14095	0.317039	0.62733	2.19088
AN3729	fksA	primary cell septum biogenesis		-0.407219	-0.330857	-0.55626	0.143424	0.239524	0.112631
AN3735		axial cellular bud site selection		-0.78644	0.180583	-1.34158	0.434457	0.149446	-1.07139
AN3910		mitotic sister chromatid segregation		-1.85542	-1.83003	-1.65076	-0.633696	-0.909777	-0.472658
AN3941	nimT	G2/M transition of mitotic cell cycle		-1.98362	-1.27962	-1.85299	-0.426143	-0.23196	-0.716006
AN3946	sldA	attachment of mitotic spindle microtubules to kinetochore		-3.59408	-3.34061	-1.80165	-0.869281	-2.74942	-1.00516
AN4182	nimX	G1/S transition of mitotic cell cycle		-2.43976	-1.22134	-2.62319	-0.427918	-0.850623	-1.41292
AN4265		mitotic chromosome condensation		-1.94096	-0.546672	-0.529982	-0.369994	0.207011	0.0690306
AN4270		axial cellular bud site selection		0.619878	0.264169	-0.226178	0.0993164	0.624178	0.0584952
AN4279	chkB	intra-S DNA damage checkpoint		-0.711808	-0.634443	-0.406751	-1.31216	-0.278068	-0.318274
AN4360		establishment of mitotic sister chromatid cohesion		-0.0145172	0.246047	0.1842	0.269274	0.623057	0.458574
AN4399	ubcN	mitotic spindle elongation		0.00990288	0.416099	0.631667	-0.514153	-0.0645932	0.52697
AN4411		mitotic sister chromatid segregation		0.465991	0.405264	0.652543	0.222606	0.763504	0.882734
AN4417	ndc1	mitotic spindle assembly		-0.980652	-1.40181	-1.99732	-0.952874	-0.478851	-1.59749
AN4493	rpdA	regulation of transcription involved in G1/S transition of mitotic cell cycle		0.447639	0.443777	0.18605	-0.482666	0.645989	0.780691
AN4501	artA	DNA damage checkpoint		-1.20552	-0.193016	-0.687578	-0.374188	0.411489	-0.103715
AN4513	kipB	attachment of mitotic spindle microtubules to kinetochore		-2.70617	-2.77901	-3.19556	-0.694027	-2.22713	-1.96658
AN4555		mitotic sister chromatid segregation		-1.51771	-1.22094	-1.21436	-1.28515	-2.15034	-2.03065
AN4564	teaA	mitotic actomyosin contractile ring localization		-0.59911	-0.74191	-2.78057	-0.431833	-0.24712	-1.8298
AN4571		intra-S DNA damage checkpoint		-1.0285	-0.659733	-0.804902	-0.779821	-0.255389	-0.593605
AN4597		mitotic chromosome condensation		-1.84197	-1.43423	-0.643764	-0.482461	-1.0864	-0.015176
AN4612		mitotic spindle organization in nucleus		0.628245	0.0354274	1.56708	0.360633	0.105919	1.48872
AN4667	aspA	mitotic cytokinesis		-2.53741	-1.36349	-1.6712	-1.18188	-0.987563	-0.53792
AN4678		establishment of mitotic sister chromatid cohesion		0.856989	-0.136426	-0.466415	-0.374367	-0.529421	-0.78213
AN4685		cellular bud site selection		-2.13788	-1.60247	-2.96655	-0.952099	-2.87033	-3.62806
AN4706	myoB	mitotic cytokinesis		-2.75785	-1.91746	-2.19995	-0.759839	-1.51628	-1.40394
AN4790	rrpB	mitotic sister chromatid segregation		0.0757566	0.00410259	0.985824	-0.0946036	0.258802	0.889064
AN4804		attachment of mitotic spindle microtubules to kinetochore		-0.938977	0.484274	0.897774	0.00582995	-0.054339	0.857902
AN4862	ranGAP	mitotic sister chromatid segregation		0.73389	0.187706	2.42532	-0.684139	-0.215238	1.85833
AN4867	gcpC	mitotic spindle assembly		-0.82821	0.364919	0.194912	-0.158088	-0.265797	-0.059833
AN4961		mitotic spindle organization in nucleus		-0.518195	-0.894057	0.574684	-0.0230499	-0.877797	0.130017
AN4963		mitotic actomyosin contractile ring localization		-1.10549	-1.7956	-0.854013	0.267806	0.51419	-1.02155
AN4969	ndc80	attachment of mitotic spindle microtubules to kinetochore		-1.04518	-0.361245	-1.27158	-0.476582	-0.498845	-0.742714
AN4996		mitotic sister chromatid segregation		-0.483821	-0.147154	-1.23246	-0.356222	0.435263	-0.230194
AN4997		mitotic cytokinesis		-0.567286	-1.00354	-0.374998	-0.339229	-0.246916	0.0231744
AN5057	cdcA	correction of merotelic kinetochore attachment, mitotic		-2.69865	-2.95897	-2.17979	-0.897655	-1.94041	-0.866316
AN5195		axial cellular bud site selection		0.246338	0.652061	1.79667	-0.397495	0.281619	0.850847
AN5406	top2	mitotic sister chromatid separation		-2.53896	-2.03432	-2.06423	-0.682214	-1.86805	-1.34604
AN5483		mitotic DNA replication maintenance of fidelity		0.00266989	0.33279	0.658034	0.0597157	0.313655	0.59141
AN5494	chkA	mitotic G2 DNA damage checkpoint		-0.71586	0.031637	-0.0881435	0.288305	-0.524865	-0.115779
AN5517	fbxB	G1/S transition of mitotic cell cycle		0.435287	0.475576	0.531547	0.100617	0.204124	0.452054
AN5518		barrier septum assembly		0.37721	0.461767	1.97801	-0.273151	0.36467	2.007
AN5521	alpA	attachment of mitotic spindle microtubules to kinetochore		-0.942993	-0.268957	-1.14081	-0.401316	-0.191644	-0.4273
AN5574		mitotic DNA replication initiation		-0.179294	-0.227677	1.07645	-0.122809	-0.285328	1.78582
AN5618	cdc31	mitotic spindle pole body duplication		-1.36831	-0.508095	-0.82547	-0.67066	-0.0440462	0.275936
AN5631		G1/S transition of mitotic cell cycle		0.726875	0.386128	-0.956542	0.949526	0.94735	-0.217782
AN5676		mitotic DNA replication checkpoint		-2.26509	-0.940539	-3.76084	-1.67238	-0.663075	-4.18922
AN5686	tpmA	mitotic cytokinesis		-2.58228	-1.02777	0.307819	-0.628117	-1.40618	0.0309735
AN5778		mitotic cytokinesis		-0.82001	0.00468881	0.659344	-0.00137622	-0.387963	0.529191
AN5789		cellular bud site selection		-0.608606	-2.49865	-2.29343	-2.27696	-3.771	-1.94211
AN5803	fimA	mitotic actomyosin contractile ring assembly		-0.513494	-0.344388	-0.748565	-0.242577	-1.07908	-0.632482
AN5815		correction of merotelic kinetochore attachment, mitotic		-4.47517	-3.92799	-1.44406	-1.53773	-4.30871	-1.19682
AN5822	ankA	G2/M transition of mitotic cell cycle		-0.195242	-0.459613	-1.2794	-0.59047	0.449815	-0.407687
AN5873	gcpB	mitotic spindle assembly		-0.180866	0.0393057	0.0418189	-0.0681865	0.32446	0.886074
AN5885	agsA	primary cell septum biogenesis		-0.334969	-1.42542	-0.316547	-0.931111	-3.55528	-3.06736
AN5899	smcB	mitotic chromosome condensation		-2.3045	-1.58083	-2.7455	-0.725238	-1.76141	-1.9643
AN5910		regulation of transcription involved in G1/S transition of mitotic cell cycle		-1.13882	-0.855172	-2.93111	-0.251364	-0.181761	-1.26503
AN6044	npkA	intra-S DNA damage checkpoint		1.69976	1.17909	1.01048	0.851995	1.29205	1.46604
AN6069		Okazaki fragment processing involved in mitotic DNA replication		1.12889	2.55459	-0.622801	0.611502	1.61398	-0.269489
AN6070		mitotic DNA replication initiation		-1.76362	-1.50431	-3.16237	-1.44506	-0.576651	-2.27592
AN6114		synthesis of RNA primer involved in mitotic DNA replication		0.107628	0.420715	-0.93076	0.277518	-0.00536462	-0.413909
AN6138	bimA	mitotic sister chromatid segregation		-0.49599	-0.458626	0.813817	-0.923049	-0.418388	0.24602
AN6147		DNA damage checkpoint		-0.708232	-0.396366	-1.06558	-0.310629	-0.110212	-0.850392
AN6303	uvsF	mitotic DNA replication		0.68036	1.23654	-1.20225	-0.50614	0.255678	-1.85121
AN6340	klpA	mitotic spindle elongation		-3.74468	-2.94627	-2.16731	-0.506945	-2.21658	-0.868571
AN6359	sconB	regulation of transcription involved in G1/S transition of mitotic cell cycle		0.799417	-0.0257225	0.308214	0.0564731	0.480018	0.746885
AN6364	sudA	mitotic sister chromatid cohesion		-2.17798	-0.393021	-1.29088	-1.01438	-0.543417	-0.875018
AN6391	pphA	G1/S transition of mitotic cell cycle		-0.50733	-0.391139	-0.573286	0.480045	0.658836	0.363643
AN6505	rcoA	negative regulation of transcription from RNA polymerase II promoter during mitosis		0.492084	-0.144489	0.881612	0.0799582	0.172322	0.915968
AN6523	sepA	establishment of mitotic spindle orientation		0.579685	0.223749	-1.36102	0.169188	0.88644	-0.0581833
AN6542	actA	mitotic actomyosin contractile ring assembly		-0.854271	-0.184347	-0.308751	-0.628004	0.526653	0.359067
AN6553		establishment of mitotic sister chromatid cohesion		0.611695	-0.195381	-1.48587	0.216827	0.309889	-0.995983
AN6574		mitotic G1 DNA damage checkpoint		-0.0827189	-0.166702	0.396355	-0.758344	-0.42098	0.0596487
AN6600		mitotic sister chromatid segregation		-2.54299	-1.70616	-1.90941	-1.49297	-1.94665	-0.862462
AN6611		intra-S DNA damage checkpoint		-0.142837	0.238825	0.734883	-0.0359116	0.149172	1.15668
AN6616	nuvG	intra-S DNA damage checkpoint		-2.25471	-1.34746	-0.282246	-0.664608	-1.62264	-0.72422
AN6685		cellular bud site selection		-0.818088	-0.226517	-1.19929	-0.463019	-0.0116197	-1.1123
AN6687		mitotic sister chromatid segregation		-1.01036	0.0607854	0.0605023	-1.00054	0.256721	0.442586
AN6688	aspB	mitotic cytokinesis		-1.82134	-0.684148	-1.44526	-0.454478	0.182766	-0.16069
AN6689		mitotic cytokinesis, site selection		-0.73164	-0.369039	-0.613623	-0.239026	0.330053	-0.0647183
AN6705		G1/S transition of mitotic cell cycle		-0.582784	-0.436671	-0.290382	-0.689422	0.0235217	0.762679
AN6732		mitotic actomyosin contractile ring assembly actin filament organization		-2.50321	-1.87788	-0.661126	-0.720662	-2.04964	-0.478544
AN6896		mitotic DNA replication checkpoint		-1.68686	-0.896798	-2.03176	-0.737446	-1.1408	-1.86044
AN6975	uvsB	mitotic G2 DNA damage checkpoint		-0.962124	0.148782	0.28283	-0.288014	0.23332	0.718312
AN7007		mitotic DNA replication checkpoint		-2.04072	-0.956009	-3.70851	-1.51468	-1.26419	-3.51811
AN7206	spgA	exit from mitosis		-0.370386	0.409319	-0.207739	0.740051	1.14676	0.916899
AN7254		mitotic spindle disassembly		1.78893	2.03078	1.23401	1.0898	2.05661	1.61627
AN7296	bimD	mitotic sister chromatid cohesion		-2.47007	-1.21604	-2.49102	-0.59327	-0.274836	-1.16419
AN7309	uvsH	DNA damage checkpoint		-0.22923	-0.221967	-0.785909	-0.72457	0.237978	-0.508952
AN7423		mitotic DNA replication		-0.710961	0.318483	-0.756731	-0.900468	0.30335	-0.847951
AN7439		mitotic DNA replication initiation		-1.03529	-0.55157	-0.88509	-1.27385	-0.77873	-0.797488
AN7440		mitotic sister chromatid segregation		-0.623871	-0.696367	-1.87755	-1.51644	-1.09517	-1.95019
AN7441		mitotic sister chromatid biorientation		-0.997014	-0.592277	-0.892769	-1.24327	-0.720659	-0.382473
AN7465		mitotic sister chromatid cohesion		-0.366841	-0.659316	0.432755	-0.142254	-0.591096	0.660156
AN7499		mitotic sister chromatid cohesion		0.16915	0.296432	-2.48617	-0.0902531	0.553988	-1.54336
AN7562		barrier septum assembly		0.560683	1.12997	0.730179	0.196248	0.286528	0.240948
AN7576		barrier septum assembly		-1.0129	0.0392248	-1.72811	-0.511702	-0.02121	-0.559651
AN7707		mitotic actomyosin contractile ring assembly		-1.39466	0.272479	0.600947	-0.753039	-0.113705	-0.417091
AN8056		mitotic chromosome condensation		-1.881	-1.35482	-1.00058	-0.0784681	-0.904542	0.103072
AN8064		DNA damage checkpoint		-1.3407	-0.710818	-1.93303	-0.461094	-0.775624	-1.37901
AN8182	aspC	mitotic cytokinesis		-2.0561	-0.695261	-1.0973	-1.6968	-0.941507	-0.797237
AN8187		mitotic sister chromatid segregation		-3.15079	-1.6993	-0.307897	-1.97188	-1.95864	-0.272107
AN8211		mitotic sister chromatid segregation		-0.452201	-0.617576	-1.6667	0.150401	0.907204	-0.142616
AN8261	phoA	regulation of transcription involved in G1/S transition of mitotic cell cycle		0.795445	0.451791	1.46193	-0.332761	-0.109953	1.02044
AN8282		mitotic sister chromatid segregation		-0.810837	-0.509415	-0.196074	-0.427858	-0.503924	0.10545
AN8751	sidB	barrier septum assembly		0.00605146	-0.112739	-0.982662	0.111055	0.822948	-0.188692
AN8783	bimB	mitotic spindle organization		-2.59179	-2.40032	-2.63376	-0.865991	-1.84734	-1.52637
AN8820	cnaA	G1/S transition of mitotic cell cycle		-0.0497562	0.201985	-0.348563	0.515461	0.294902	0.494189
AN8831	ampB	mitotic actomyosin contractile ring assembly		0.635772	0.921262	-0.261526	0.0232816	0.765901	-0.464116
AN8844	rbxA	G1/S transition of mitotic cell cycle		-0.0311193	-0.151088	-0.250096	0.0467735	-0.341244	-0.464657
AN8857		cellular bud site selection		0.141045	0.261685	1.86242	-0.450193	0.102916	1.27208
AN8862	myoV	establishment of mitotic spindle orientation		-1.19556	-0.710809	-1.32024	-1.16989	-1.16345	-1.01021
AN8876		mitotic G2 DNA damage checkpoint		0.442231	1.08971	0.327185	-0.844516	-0.158135	-0.090639
AN9435		mitotic nuclear division		-0.528731	0.676708	-0.0661549	-0.291718	0.0917812	-0.0474119
AN9463		mitotic actomyosin contractile ring localization		-0.783086	-1.39277	-1.53368	-0.115252	-1.23955	-0.986632
AN9467	parA	cellular bud neck septin ring organization		-0.787524	-0.442062	-0.808481	0.366769	-0.0453474	0.2669
AN9504	nimA	G2/M transition of mitotic cell cycle		-1.11537	-1.03236	-0.92723	-0.517222	-0.862968	-0.504831
	Frequency in the up-regulated gene group:			3/636	6/686	3/493	1/546	0/504	3/449
	Background frequency			218/10390
	Significant enrichment in the studied gene group in compare to the background frequency (Fisher's exact test, p<0.05):
				NO	NO	NO	NO	NO	NO
	Significant difference between the DatfA and the appropriate control strain (Fisher's exact test, p<0.05):
							NO	YES	NO
	Frequency in the down-regulated gene group:			41/653	25/645	22/357	14/557	12/638	11/525
	Background frequency			218/10390
	Significant enrichment in the studied gene group in compare to the background frequency (Fisher's exact test, p<0.05):
				YES	YES	YES	NO	NO	NO
	Significant difference between the DatfA and the appropriate control strain (Fisher's exact test, p<0.05):
							YES	YES	YES
Antioxidant enzyme genes				Microarray data (log2 R)
				Control strain			DatfA mutant
Gene ID	Gene name	AspGD description	Probable/known function	MSB	tBOOH	Diamide	MSB	tBOOH	Diamide
AN8637	catA	Conidia-specific catalase; predicted role in gluconic acid and gluconate metabolism	catalase	2.53202	-0.263257	-0.0800936	0.0242923	-0.0354265	0.0822133
AN9339	catB	Hyphal catalase with a predicted role in gluconic acid and gluconate metabolism	catalase	1.57769	1.90413	0.963041	2.57082	2.53086	2.08019
AN5918	catC	Putative catalase with a predicted role in gluconic acid and gluconate metabolism	catalase	0.250177	-1.0757	2.42356	0.67431	-1.51849	2.59659
AN8553		Putative catalase with a predicted role in gluconic acid and gluconate metabolism	catalase	-0.278779	-0.48954	-0.152587	0.390625	-0.0600462	-0.0251494
AN7388	cpeA	Putative catalase-peroxidase with a predicted role in gluconic acid and gluconate metabolism; protein also identified as laccase II which is expressed during sexual development	catalase-peroxidase	-2.1329	0.578024	0.593046	0.539404	-1.9138	-0.453641
AN7924		Has domain(s) with predicted peroxidase activity	peroxidase	0.403601	1.74018	-0.0562794	0.637497	1.89851	0.183602
AN8395		Has domain(s) with predicted peroxidase activity	peroxidase	0.450605	-0.00232996	0.128414	-0.112522	-0.0286256	-0.0356245
AN1252		Has domain(s) with predicted peroxiredoxin activity and role in oxidation-reduction process	peroxidase	0.13723	-0.0491639	-0.0993031	-0.000935477	0.1633	0.0304103
AN4023		Has domain(s) with predicted peroxiredoxin activity and role in oxidation-reduction process	peroxidase	-1.94212	-1.33755	0.345409	-0.389808	-0.785799	0.188673
AN5232		Has domain(s) with predicted peroxiredoxin activity and role in oxidation-reduction process	peroxidase	0.234357	-0.22394	0.203479	2.13982	0.101308	0.790428
AN9464		Has domain(s) with predicted electron carrier activity, protein disulfide oxidoreductase activity and role in cell redox homeostasis	glutaredoxin	-0.799224	-0.581303	0.666651	0.0425867	-0.386444	0.958503
AN4215		Ortholog(s) have glutathione disulfide oxidoreductase activity, glutathione peroxidase activity, glutathione transferase activity and role in glutathione metabolic process, pathogenesis, removal of superoxide radicals	glutaredoxin	0.843355	0.32699	2.01104	1.0883	0.713436	1.60554
AN4304		Ortholog(s) have glutathione disulfide oxidoreductase activity, role in cellular response to oxidative stress, response to osmotic stress and mitochondrial matrix localization	glutaredoxin	1.15027	0.727992	1.09825	0.223376	0.582679	0.881764
AN7567		Ortholog(s) have RNA polymerase II activating transcription factor binding, glutathione disulfide oxidoreductase activity	glutaredoxin	2.30846	1.20139	2.39737	1.58251	1.40138	1.74866
AN2846	gpxA	Putative glutathione peroxidase with a predicted role in glutathione biosynthesis; protein induced by farnesol	glutathione peroxidase	4.08062	4.27695	3.96403	3.2939	3.52087	3.55121
AN0629		Ortholog(s) have glutathione peroxidase activity, glutathione transferase activity, role in glutathione metabolic process and endoplasmic reticulum, mitochondrial outer membrane, plasma membrane localization	glutathione peroxidase/S-transferase	0.480622	0.888055	0.620296	-0.218598	1.68156	0.786785
AN0932	glrA	Putative glutathione oxidoreductase with a predicted role in glutathione biosynthesis	glutathione reductase	3.02533	1.67565	1.97696	2.46116	2.06322	1.70142
AN10379		-	glutathione-S-transferase	0.677646	-0.74713	-0.73874	1.01403	-0.406192	-0.564619
AN5831		-	glutathione-S-transferase	6.24674	2.90629	3.31633	3.61397	3.02529	2.04654
AN0629		Ortholog(s) have glutathione peroxidase activity, glutathione transferase activity, role in glutathione metabolic process and endoplasmic reticulum, mitochondrial outer membrane, plasma membrane localization	glutathione-S-transferase	0.480622	0.888055	0.620296	-0.218598	1.68156	0.786785
AN3255		Predicted glutathione peroxidase; predicted secondary metabolism gene cluster member	glutathione-S-transferase	-0.140275	-0.860681	-0.230844	-0.741507	-1.35271	-0.671309
AN6024	gstB	Protein with glutathione S-transferase and glutathione peroxidase activities; intracellular, menadione stress-induced protein	glutathione-S-transferase	1.28606	-0.0498938	0.746233	2.62846	-1.08328	-0.522587
AN10273	gst3	Putative glutathione S-transferase; intracellular, menadione stress-induced protein	glutathione-S-transferase	2.96147	0.23568	1.72419	1.64878	-0.464515	0.97618
AN4905	gstA	theta class glutathione S-transferase; involved in resistance to a variety of xenobiotics and metals; confers susceptibility to the systemic fungicide carboxin	glutathione-S-transferase	3.95524	1.93091	3.80834	3.0954	0.130389	2.6602
AN10223		Putative 1-Cys peroxiredoxin; intracellular; protein abundance decreased by menadione stress; expression reduced after exposure to farnesol	peroxiredoxin	-2.46667	-1.17312	0.607526	-0.0271627	-2.2495	0.8888
AN3973		Putative peroxiredoxin	peroxiredoxin	-0.103036	-0.51897	0.816111	-0.0387737	0.209461	0.687216
AN0241	sodA	Cu/Zn-superoxide dismutase; induced under iron starvation and repressed under copper starvation	Cu/Zn-superoxide dismutase	0.0548605	0.341781	1.07351	0.459504	0.143187	0.477517
AN5577	sodB	Manganese-superoxide dismutase	Mn-superoxide dismutase	0.832709	0.364484	1.38057	0.720381	0.190703	0.664066
AN1131		Putative cytosolic Cu/Zn superoxide dismutase; transcript repressed by light in developmentally competent mycelia	Cu/Zn-superoxide dismutase	-3.96675	-2.93824	-3.44807	-0.792279	-2.5637	-2.08831
AN0785	sodM	Putative manganese superoxide dismutase	Mn-superoxide dismutase	-0.173468	0.00080676	0.775274	-0.0800323	0.271384	0.742917
AN8080		Ortholog(s) have thioredoxin peroxidase activity, role in cell redox homeostasis, cellular response to oxidative stress, response to metal ion and hyphal cell wall, peroxisome, plasma membrane, yeast-form cell wall localization	thioredoxin peroxidase	-2.30223	-1.252	-1.0538	0.48857	-1.08574	-0.63763
AN8218	trxB	Putative thioredoxin reductase	thioredoxin reductase	-5.86817	-3.72011	-5.38949	-3.62077	-3.74891	-4.81686
AN3581	trxR	Thioredoxin reductase with a predicted role in pyrimidine metabolism; putative flavoprotein; intracellular, menadione stress-induced protein; transcripts of two different sizes have been detected	thioredoxin reductase	3.30695	2.57974	2.90981	3.122	3.48135	4.09749
AN0170	trxA	Thioredoxin; predicted role in cell redox homeostasis; required for conidiation; expression upregulated after exposure to farnesol	thioredoxin	1.04032	0.758582	1.42412	1.94805	1.23489	1.31231
AN8692	prxA	Thioredoxin-dependent peroxidase; intracellular; PRX5-like domain; highly similar to the allergen Aspf3 from related fungi; menadione stress-repressed protein; osmoadaptation-induced protein; repressed by starvation-induced autophagy	thioredoxin peroxidase	2.08612	1.71479	2.12015	2.17187	2.30505	2.35784
AN10220	ccp1	Putatice cytochrome c peroxidase; intracellular; protein abundance decreased by menadione stress	cytochrome c peroxidase	2.7547	2.26798	3.41088	2.33156	1.65476	3.25016
AN5440		Putative cytochrome c peroxidase; expression upregulated after exposure to farnesol	cytochrome c peroxidase	2.8618	3.22528	0.163839	2.52709	4.63473	2.17001
	Frequency in the up-regulated gene group:			11/636	10/686	7/493	14/546	6/504	6/449
	Background frequency			38/10390
	Significant enrichment in the studied gene group in compare to the background frequency (Fisher's exact test, p<0.05):
				YES	YES	YES	YES	YES	YES
	Significant difference between the DatfA and the appropriate control strain (Fisher's exact test, p<0.05):
							NO	NO	NO
	Frequency in the down-regulated gene group:			5/653	2/645	2/357	1/557	3/638	1/525
	Background frequency			38/10390
	Significant enrichment in the studied gene group in compare to the background frequency (Fisher's exact test, p<0.05):
				NO	NO	NO	NO	NO	NO
	Significant difference between the DatfA and the appropriate control strain (Fisher's exact test, p<0.05):
							NO	NO	NO
Siderophore biosynthesis genes				Microarray data (log2 R)
				Control strain			DatfA mutant
Gene ID	Gene name	GO term		MSB	tBOOH	Diamide	MSB	tBOOH	Diamide
AN8770		positive regulation of siderophore biosynthetic process		-0.0816488	0.340727	0.230363	0.615854	1.19417	1.02176
AN0608		siderophore biosynthetic process		0.324871	2.28397	-0.635247	0.66384	1.68802	-0.266884
AN0758		siderophore biosynthetic process		0.0382881	-0.180801	-0.1255	-0.109663	0.348358	-0.0532986
AN10080	sidL	siderophore biosynthetic process		-0.89664	-1.91524	-0.929445	0.341829	-1.08238	-1.35967
AN5823	sidA	siderophore biosynthetic process		1.74905	1.7235	-0.779135	0.78867	1.8251	0.157685
AN6234	sidF	siderophore biosynthetic process		-1.05251	1.48656	-0.436127	-0.0145694	0.991004	0.332142
AN0607	sidC	ferricrocin biosynthetic process		-1.19233	-1.19922	-1.30227	-0.633896	-0.249368	-0.597818
AN0609	sidI	ferricrocin biosynthetic process		0.935103	4.9361	-0.128005	2.52488	4.18602	-0.211419
AN6140	npgA	ferricrocin biosynthetic process		-0.158783	1.56882	1.39215	1.35563	0.933341	1.31208
AN8251	hapX	N',N'',N'''-triacetylfusarinine C biosynthetic process		2.12373	1.95774	0.981716	2.01771	2.19868	1.39037
AN6236	sidD	N',N'',N'''-triacetylfusarinine C biosynthetic process		-1.28359	1.67118	-0.851003	-0.568313	1.90351	-0.900275
AN6235	sidH	N',N'',N'''-triacetylfusarinine C biosynthetic process		0.404323	1.70866	0.802602	-0.0383287	1.94671	0.572034
AN10764		N',N'',N'''-triacetylfusarinine C biosynthetic process		-0.574377	0.765953	3.58446	0.119254	0.210486	2.60847
AN3817		N',N'',N'''-triacetylfusarinine C biosynthetic process		-1.25065	-1.29992	-1.60601	-0.640115	-0.849497	-0.79796
AN2855	pacC	N',N'',N'''-triacetylfusarinine C metabolic process		0.773313	1.76099	-2.08879	-0.152447	2.32834	-0.869639
	Frequency in the up-regulated gene group:			1/636	7/686	1/493	2/546	3/504	1/449
	Background frequency			15/10390
	Significant enrichment in the studied gene group in compare to the background frequency (Fisher's exact test, p<0.05):
				NO	YES	NO	NO	YES	NO
	Significant difference between the DatfA and the appropriate control strain (Fisher's exact test, p<0.05):
							NO	NO	NO
	Frequency in the down-regulated gene group:			0/653	1/645	0/357	0/557	0/638	0/525
	Background frequency			15/10390
	Significant enrichment in the studied gene group in compare to the background frequency (Fisher's exact test, p<0.05):
				NO	NO	NO	NO	NO	NO
	Significant difference between the DatfA and the appropriate control strain (Fisher's exact test, p<0.05):
							NO	NO	NO
FeS cluster assembly genes				Microarray data (log2 R)
				Control strain			DatfA mutant
Gene ID	Gene name	GO term		MSB	tBOOH	Diamide	MSB	tBOOH	Diamide
AN0447		iron-sulfur cluster assembly		2.66073	0.65455	2.29748	-0.230688	0.426096	2.09194
AN10012		iron-sulfur cluster assembly		2.51262	0.57325	1.20617	0.481278	0.766282	1.48998
AN10237		iron-sulfur cluster assembly		0.834468	-1.84616	-0.865733	-0.816897	-1.03877	-0.963028
AN10584		iron-sulfur cluster assembly		1.47601	0.827408	1.55575	-0.287021	0.530505	0.961154
AN11060		iron-sulfur cluster assembly		2.06799	0.857735	1.16967	1.54031	0.642413	1.31139
AN12201		iron-sulfur cluster assembly		1.65285	-0.650523	0.809429	-0.779648	-0.536215	0.266399
AN1385		iron-sulfur cluster assembly		-0.140321	0.438476	0.554799	1.02527	-0.180286	0.563991
AN1407		iron-sulfur cluster assembly		1.87367	0.873282	3.17358	0.827527	0.18959	2.49727
AN1469		iron-sulfur cluster assembly		0.794075	0.104885	-0.0460316	-0.49976	0.0350387	0.530507
AN1986		iron-sulfur cluster assembly		0.136267	0.00614558	0.291217	0.159473	0.689644	0.555213
AN2155		iron-sulfur cluster assembly		2.65672	1.07805	2.63855	0.274855	0.991459	2.14423
AN2508		[2Fe-2S] cluster assembly		2.06277	1.00682	0.843601	0.389177	1.0784	1.0015
AN3632		iron-sulfur cluster assembly		3.68172	2.37831	0.84156	1.64695	2.41241	0.541549
AN4297		iron-sulfur cluster assembly		-0.728993	-1.02321	-0.689437	-0.912701	-0.970955	-0.206964
AN4655		[2Fe-2S] cluster assembly		2.42345	1.39534	1.55591	2.38108	2.27404	2.35822
AN5953		iron-sulfur cluster assembly		2.2085	0.944911	1.8092	0.741036	1.49177	2.15826
AN8485		iron-sulfur cluster assembly		2.98672	2.04834	0.95415	2.09047	1.46351	1.23465
	Frequency in the up-regulated gene group:			9/636	2/686	2/493	4/546	2/504	2/449
	Background frequency			17/10390
	Significant enrichment in the studied gene group in compare to the background frequency (Fisher's exact test, p<0.05):
				YES	NO	NO	YES	NO	NO
	Significant difference between the DatfA and the appropriate control strain (Fisher's exact test, p<0.05):
							NO	NO	NO
	Frequency in the down-regulated gene group:			0/653	1/645	0/357	0/557	0/638	0/525
	Background frequency			17/10390
	Significant enrichment in the studied gene group in compare to the background frequency (Fisher's exact test, p<0.05):
				NO	NO	NO	NO	NO	NO
	Significant difference between the DatfA and the appropriate control strain (Fisher's exact test, p<0.05):
							NO	NO	NO
Two-component signal transduction system genes				Microarray data (log2 R)
				Control strain			DatfA mutant
Gene ID	Gene name	GO term		MSB	tBOOH	Diamide	MSB	tBOOH	Diamide
AN1800	tcsB	phosphorelay response regulator activity		1.44936	1.17903	-0.173235	1.26892	1.83781	-0.222519
AN2363	hk-8-6	phosphorelay response regulator activity		1.2135	0.439705	-1.69092	0.902009	0.86368	-1.10498
AN2581	hk-8-1	phosphorelay response regulator activity		1.91861	0.427624	-2.20767	0.396521	1.06599	-0.740093
AN3101	phkB	phosphorelay response regulator activity		1.28606	-0.598305	-1.86096	-0.394227	-0.280332	-1.21925
AN3102	phkA	phosphorelay response regulator activity		-0.375821	-0.549757	-0.978112	0.565708	0.663332	-0.193394
AN3214	hk-8-5	phosphorelay response regulator activity		0.509518	-0.385904	-1.21522	-0.12403	0.799719	-1.13528
AN4113	hk-8-2	phosphorelay response regulator activity		1.98928	-2.89575	-2.28219	0.415292	-0.950341	-1.70969
AN4447	hk-9	phosphorelay response regulator activity		0.529945	-0.172696	-0.256806	0.438052	-0.27278	0.0681828
AN4479	nikA	phosphorelay response regulator activity		-0.587233	-0.458322	-1.41798	0.0334706	0.178544	-0.632691
AN4818	hk-8-4	phosphorelay response regulator activity		0.317187	-0.953103	-0.807801	0.278215	0.173623	0.130022
AN5296	tcsA	phosphorelay response regulator activity		1.9564	1.41854	-0.248905	1.12119	1.37852	0.0250844
AN6820	hk-8-3	phosphorelay response regulator activity		3.58275	-0.443233	-0.16874	0.568759	0.552803	0.494146
AN7945	hk2	phosphorelay response regulator activity		3.60603	0.0828579	-0.504426	0.0513489	0.0945112	-0.0203102
AN9008	fphA	phosphorelay response regulator activity		0.0774538	0.336877	-0.0443893	1.05976	0.644193	0.71941
AN9048	hk-8-7	phosphorelay response regulator activity		0.516806	0.524564	-0.990945	1.00484	0.500283	-0.435239
AN4134	srrC	phosphorelay response regulator activity		0.218828	-0.413534	0.520748	-0.312711	-0.19633	0.143931
AN7697	sskA	phosphorelay response regulator activity		0.0789613	0.362892	-0.167929	0.238102	1.09995	-0.560493
AN2005	ypdA	osmosensory signaling via phosphorelay pathway		1.22854	-0.251277	-0.330444	-0.326629	-1.1273	-0.739124
	Frequency in the up-regulated gene group:			4/636	0/686	0/493	0/546	0/504	0/449
	Background frequency			18/10390
	Significant enrichment in the studied gene group in compare to the background frequency (Fisher's exact test, p<0.05):
				YES	NO	NO	NO	NO	NO
	Significant difference between the DatfA and the appropriate control strain (Fisher's exact test, p<0.05):
							NO	NO	NO
	Frequency in the down-regulated gene group:			0/653	1/645	0/357	0/557	0/638	0/525
	Background frequency			18/10390
	Significant enrichment in the studied gene group in compare to the background frequency (Fisher's exact test, p<0.05):
				NO	NO	NO	NO	NO	NO
	Significant difference between the DatfA and the appropriate control strain (Fisher's exact test, p<0.05):
							NO	NO	NO
Nitrate utilization genes				Microarray data (log2 R)
				Control strain			DatfA mutant
Gene ID	Gene name	GO term		MSB	tBOOH	Diamide	MSB	tBOOH	Diamide
AN0399	nrtB	nitrate transmembrane transporter activity		-2.65594	-0.393508	-3.31373	1.52832	-1.70899	-4.30728
AN0947	cnxABC	nitrate reductase (NADPH) activity		0.0563427	0.186207	-1.13818	0.326368	-0.355661	-0.76532
AN1006	niaD	nitrate reductase (NADPH) activity		-2.22867	-1.08058	-2.64802	0.908136	-1.67266	-2.73303
AN1007	niiA	nitrite reductase [NAD(P)H] activity		-1.58316	-1.26003	-2.18353	0.84751	-1.1701	-1.86186
AN1008	crnA	nitrate transmembrane transporter activity		-3.11913	-1.22512	-1.47727	1.8489	-0.931585	-0.401087
AN2327	cnxF	nitrate reductase (NADPH) activity		-0.0533995	-0.788004	-0.706014	-0.165698	-0.932032	-1.12595
AN3778	cnxE	nitrate reductase (NADPH) activity		-1.5463	-0.28834	-2.14618	0.497773	-0.947849	-1.82063
AN4841	cnxH	nitrate reductase (NADPH) activity		-0.632849	-0.298651	-0.399129	-0.000779147	0.413628	0.0529373
AN8058		nitrate assimilation		3.13398	-0.488166	-0.13073	-0.105415	-0.0923512	0.362777
AN8168	nmrA	regulation of nitrate assimilation		0.0604955	-0.308853	0.513147	0.159905	0.360453	0.987297
AN8449		nitrate assimilation		2.85165	-0.0887732	-0.112973	0.380284	-0.23487	-0.10903
AN8647	nitA	nitrite uptake transmembrane transporter activity		-3.19103	-0.69979	-0.616646	0.783369	-0.0979469	-0.549767
AN8667	areA	nitrate assimilation		0.483076	0.913811	-0.107115	-0.0560504	1.57158	0.494472
AN9143	cnxG	nitrate reductase (NADPH) activity		-0.668409	-1.04678	0.657965	-0.908856	-0.103813	0.447047
	Frequency in the up-regulated gene group:			2/636	0/686	0/493	2/546	0/504	0/449
	Background frequency			14/10390
	Significant enrichment in the studied gene group in compare to the background frequency (Fisher's exact test, p<0.05):
				NO	NO	NO	NO	NO	NO
	Significant difference between the DatfA and the appropriate control strain (Fisher's exact test, p<0.05):
							NO	NO	NO
	Frequency in the down-regulated gene group:			4/653	0/645	2/357	0/557	0/638	2/525
	Background frequency			14/10390
	Significant enrichment in the studied gene group in compare to the background frequency (Fisher's exact test, p<0.05):
				YES	NO	NO	NO	NO	NO
	Significant difference between the DatfA and the appropriate control strain (Fisher's exact test, p<0.05):
							NO	NO	NO
ER to Golgi vesicle-mediated transport genes				Microarray data (log2 R)
				Control strain			DatfA mutant
Gene ID	Gene name	GO term		MSB	tBOOH	Diamide	MSB	tBOOH	Diamide
AN0170	trxA	ER to Golgi vesicle-mediated transport		1.04032	0.758582	1.42412	1.94805	1.23489	1.31231
AN0261	sec23	ER to Golgi vesicle-mediated transport		-2.18056	-0.0891498	-0.541655	-0.000396683	0.586876	0.175699
AN0411		ER to Golgi vesicle-mediated transport		-0.110398	-0.24645	-0.370515	-0.761814	-0.545348	-0.985129
AN0706		ER to Golgi vesicle-mediated transport		-1.05898	-0.188852	-1.65164	-0.665748	-0.710815	-1.28346
AN0922		ER to Golgi vesicle-mediated transport		-1.75504	-0.413192	-0.884616	-0.428673	-0.216321	-0.196477
AN10186		ER to Golgi vesicle-mediated transport		0.461876	0.260779	-0.309235	0.254006	-0.0217844	-0.358048
AN10313		ER to Golgi vesicle-mediated transport		-0.920846	-1.14615	0.584593	-1.79896	-1.32233	-0.292281
AN1069		ER to Golgi vesicle-mediated transport		0.746211	0.304381	0.751009	-0.231633	1.57596	0.844585
AN10878		ER to Golgi vesicle-mediated transport		-0.313106	-0.115151	1.06205	-0.315547	-0.0431821	0.602888
AN1117		ER to Golgi vesicle-mediated transport		-2.79708	-0.690682	-1.81174	-1.13295	-0.474578	-1.35773
AN11226		ER to Golgi vesicle-mediated transport		-2.10138	-1.31608	-0.288255	-2.18332	-1.23839	-0.75907
AN1126	arfA	ER to Golgi vesicle-mediated transport		-0.591444	-0.262051	0.110717	0.0644378	0.248107	0.0981568
AN11500		ER to Golgi vesicle-mediated transport		-1.46933	0.266423	-2.31339	0.515085	0.156174	-1.68484
AN1154		ER to Golgi vesicle-mediated transport		-2.75878	-1.00277	-0.743865	-1.28148	-0.654459	-0.683902
AN11715		ER to Golgi vesicle-mediated transport		0.517391	0.43008	0.381818	-0.490535	0.311071	0.173233
AN1845	shrA	ER to Golgi vesicle-mediated transport		-1.12924	-0.002941	-1.77663	-0.901627	0.15549	-1.39123
AN1980		ER to Golgi vesicle-mediated transport		-1.71984	-0.318527	-0.376391	0.223008	0.163442	0.293291
AN1981		ER to Golgi vesicle-mediated transport		-0.0341144	0.220938	-0.302186	-0.392237	-0.675895	-0.392015
AN2222		ER to Golgi vesicle-mediated transport		-1.60098	-0.839915	2.3692	-1.32771	-1.17492	1.30635
AN3026	copA	ER to Golgi vesicle-mediated transport		-3.03285	-0.750736	-1.34665	-0.620714	0.270506	0.328907
AN3080		ER to Golgi vesicle-mediated transport		-2.95035	-1.0484	-3.90585	-0.43662	-0.487125	-2.37831
AN3720		ER to Golgi vesicle-mediated transport		-1.83196	-0.575045	-1.7537	-0.0323395	0.331686	0.0752877
AN3747		ER to Golgi vesicle-mediated transport		1.3138	-0.0625557	0.243875	-0.261463	0.361656	0.605022
AN4165		ER to Golgi vesicle-mediated transport		-1.07948	-0.208016	2.43994	-0.755994	0.728409	1.73936
AN4281	rabO	ER to Golgi vesicle-mediated transport		-0.0219171	0.372528	0.400219	-0.339168	0.596117	0.469241
AN4317	sec13	COPII-coated vesicle budding		-3.13129	-0.465526	-0.230973	-1.2887	-0.34608	0.153006
AN4446		ER to Golgi vesicle-mediated transport		-2.47905	-0.795662	-0.952229	-1.22864	-0.630024	-0.986339
AN4495		ER to Golgi vesicle-mediated transport		-1.09518	-0.769763	0.85523	-0.554172	-0.404125	0.951976
AN4886		ER to Golgi vesicle-mediated transport		-1.18685	-0.306901	0.520932	-0.369202	-0.744762	0.186562
AN5127		ER to Golgi vesicle-mediated transport		-0.373087	0.251705	-0.0973163	-0.0794347	0.352743	-0.00251486
AN5131	atgH	ER to Golgi vesicle-mediated transport		0.287998	1.70117	1.52098	1.13641	1.24443	0.925906
AN5195		ER to Golgi vesicle-mediated transport		0.246338	0.652061	1.79667	-0.397495	0.281619	0.850847
AN5788		ER to Golgi vesicle-mediated transport		0.295994	0.232786	0.342705	-0.915819	0.121147	-0.105264
AN5915	rerA	ER to Golgi vesicle-mediated transport		-1.25132	-0.406266	0.0233816	-0.717377	0.383747	-0.145142
AN5972		ER to Golgi vesicle-mediated transport		-2.97196	-0.505758	-1.46	-0.770623	0.137116	-0.384479
AN6033		ER to Golgi vesicle-mediated transport		-0.639019	0.0133984	-0.294772	-0.133053	0.0939079	0.143112
AN6257		ER to Golgi vesicle-mediated transport		-2.74867	-0.626087	-1.84077	-0.106964	0.220629	-0.627751
AN6709	hypB	ER to Golgi vesicle-mediated transport		-0.794615	-0.00589523	-1.35845	0.0653342	0.660482	-0.330053
AN6825		ER to Golgi vesicle-mediated transport		-0.0905448	0.241735	0.483791	0.0905947	0.0690847	0.364213
AN7302		ER to Golgi vesicle-mediated transport		-3.24652	-0.888435	-0.498903	-1.12701	-1.00723	-0.307796
AN7679		ER to Golgi vesicle-mediated transport		-3.83036	-0.838508	-0.840106	-0.971585	-0.922026	-0.850368
AN8488		ER to Golgi vesicle-mediated transport		-0.766344	0.231558	1.2031	0.119321	-0.194618	0.708206
AN8828		ER to Golgi vesicle-mediated transport		0.294408	0.00552964	1.86513	-0.40793	-0.339866	1.28982
AN9086		ER to Golgi vesicle-mediated transport		-1.85272	-0.300584	1.09539	-0.155804	-0.913046	0.586775
	Frequency in the up-regulated gene group:			0/636	1/686	2/493	1/546	0/504	0/449
	Background frequency			44/10390
	Significant enrichment in the studied gene group in compare to the background frequency (Fisher's exact test, p<0.05):
				NO	NO	NO	NO	NO	NO
	Significant difference between the DatfA and the appropriate control strain (Fisher's exact test, p<0.05):
							NO	NO	NO
	Frequency in the down-regulated gene group:			12/653	0/645	1/357	2/557	0/638	1/525
	Background frequency			44/10390
	Significant enrichment in the studied gene group in compare to the background frequency (Fisher's exact test, p<0.05):
				YES	NO	NO	NO	NO	NO
	Significant difference between the DatfA and the appropriate control strain (Fisher's exact test, p<0.05):
							YES	NO	NO
Squalene - ergosterol pathway genes				Microarray data (log2 R)
				Control strain			DatfA mutant
Gene ID	Gene name	GO term	Orthologues in A. fumigatus	MSB	tBOOH	Diamide	MSB	tBOOH	Diamide
AN0451		ergosterol biosynthetic process	erg2	-1.25934	-0.59693	-1.09502	-0.597365	-0.69584	-0.447939
AN10648		ergosterol biosynthetic process	erg4 (erg4B)	-2.75897	-2.83219	-1.76455	-1.50778	-2.19319	-0.861362
AN11008	ergA	ergosterol biosynthetic process	erg1	-0.75862	-1.53076	-1.71823	0.186696	0.346196	-1.02373
AN11065		-	erg7 (erg7A), erg7B and erg7C	0.925465	0.000636972	1.33638	-1.10659	-0.330244	0.84323
AN11081		steroid biosynthetic process	erg26	-1.82985	-2.18231	-1.53533	-0.909797	-1.75251	-1.06906
AN1147		-	erg27	0.840943	0.00762853	-1.29125	-0.500837	0.522627	-1.40132
AN1901	pdmA	ergosterol biosynthetic process	cyp51A and cyp51B	-0.680543	0.197421	-1.01939	0.526017	1.21264	0.32648
AN2684		sterol metabolic process	erg4A	1.48078	0.99851	-1.09572	0.0745526	1.25426	-0.782811
AN4042	cyp61A1	ergosterol biosynthetic process	erg5	-1.95873	-1.67793	-2.51366	-0.527578	-0.540716	-0.942375
AN4094		ergosterol biosynthetic process	erg24 (erg24A) and erg24B	-0.521908	0.386212	-3.8874	0.394919	-0.484072	-3.35443
AN6506		ergosterol biosynthetic process	erg3A, erg3B and erg3C	-0.461214	-0.823153	-1.46246	-0.493541	-0.0836461	-1.31458
AN6973		ergosterol biosynthetic process	erg25 (erg25A) and erg25B	0.0340627	-0.370153	-1.06899	0.00551725	-0.0468466	-1.07093
AN7146		ergosterol biosynthetic process	erg6	-1.82777	-1.0139	-1.54259	-2.40422	-0.963732	-0.636932
AN7575		steroid biosynthetic process	erg26	-0.566568	0.0248936	0.359451	-0.718404	0.0980292	0.523469
AN8283	cyp51B	ergosterol biosynthetic process	cyp51A and cyp51B	-1.53026	-1.00458	-0.544195	-1.80053	-1.72793	-0.739895
AN8907		sterol metabolic process	erg25 (erg25A) and erg25B	-1.09479	-1.39827	-1.30931	-0.263286	-0.547847	-1.47024
	Frequency in the up-regulated gene group:			0/636	0/686	0/493	0/546	0/504	0/449
	Background frequency			16/10390
	Significant enrichment in the studied gene group in compare to the background frequency (Fisher's exact test, p<0.05):
				NO	NO	NO	NO	NO	NO
	Significant difference between the DatfA and the appropriate control strain (Fisher's exact test, p<0.05):
							NO	NO	NO
	Frequency in the down-regulated gene group:			2/653	3/645	2/357	3/557	1/638	1/525
	Background frequency			16/10390
	Significant enrichment in the studied gene group in compare to the background frequency (Fisher's exact test, p<0.05):
				NO	NO	NO	NO	NO	NO
	Significant difference between the DatfA and the appropriate control strain (Fisher's exact test, p<0.05):
							NO	NO	NO
Signal transduction genes
				Microarray data (log2 R)
				Control strain			DatfA mutant
GENE ID	Gene name			MSB	tBOOH	Diamide	MSB	tBOOH	Diamide
AN0163				-2.98336	-1.20845	-0.615944	-0.0106647	-0.769865	-0.335424
AN0655	sepM			-1.86695	-2.40122	-0.817663	-0.589731	-2.10783	-0.386206
AN0664	plcA			0.618893	-0.328007	-2.11466	0.0715273	-0.516536	-2.20358
AN0829	pdeA			-0.566558	-0.279584	3.12226	0.0537587	-0.677282	2.95919
AN10614				-3.41172	-2.94255	-1.48849	-1.57727	-2.82854	-0.933847
AN11032	sepL			-1.69722	-1.77773	-0.331152	-0.880217	-1.55711	0.445509
AN1296				1.20054	3.03561	1.02713	0.890349	2.52415	1.36212
AN1560	plkA			-2.79732	-2.97327	-0.880397	-0.725868	-1.83155	-0.00643168
AN1573				1.63083	1.15218	-1.86979	1.40889	0.56652	-1.97301
AN1797				1.10258	2.62985	0.476744	0.966652	0.833705	-0.409881
AN2067	ste20			0.0773059	-0.704289	-2.59399	0.389111	-0.659581	-2.18632
AN2687	rho4			-2.89799	-2.92524	-0.77876	-0.903789	-1.46916	-0.0861215
AN3129				4.86713	5.68016	2.64524	2.85443	3.03184	0.354519
AN3159	prpA			2.97972	3.06137	0.482907	1.6273	2.55751	0.740912
AN3468	H2A.X			-1.016	-1.70429	-1.47018	-0.92612	-1.84581	-1.5256
AN3592	clxA			-3.85007	-0.114816	-1.44998	-1.11609	0.939987	-0.7296
AN3598	fprA			-2.6894	-0.872258	-0.214261	-0.251425	-0.70179	0.0147499
AN3607	lreB			-0.10644	0.208142	2.59305	-0.0178363	0.0610006	2.96281
AN3934				1.96784	1.0908	1.30577	-0.158653	-0.0141158	0.69008
AN3941	nimT			-1.98362	-1.27962	-1.85299	-0.426143	-0.23196	-0.716006
AN3946	sldA			-3.59408	-3.34061	-1.80165	-0.869281	-2.74942	-1.00516
AN4113	hk-8-2			1.98928	-2.89575	-2.28219	0.415292	-0.950341	-1.70969
AN4163	cpcB			-4.02087	-2.88477	-1.2593	-1.3338	-2.67208	-0.656937
AN4238	schA			0.067146	-0.323349	-2.6507	0.874171	0.119948	-2.47016
AN4419				0.107179	2.2445	0.408009	0.173448	1.90109	0.13117
AN4483	cmkD			1.62375	-0.729649	-3.71597	-0.458523	-0.251908	-1.32341
AN4623				-1.99168	-0.200065	-0.455328	-0.0684575	0.813148	0.656617
AN4685				-2.13788	-1.60247	-2.96655	-0.952099	-2.87033	-3.62806
AN4745				2.2734	0.217701	-0.380904	1.44895	1.30227	0.282658
AN4998	gapA			-1.32302	-1.17088	-0.492639	0.528046	-2.3715	-0.976651
AN5296	tcsA			1.9564	1.41854	-0.248905	1.12119	1.37852	0.0250844
AN5768				3.0895	1.3532	-0.559452	1.5531	1.08948	0.24392
AN5791	ppgA			3.1923	-0.447238	0.232264	-0.0785611	-0.739745	-0.211361
AN5893	flbA			2.46567	2.25449	1.38399	0.724556	2.10945	1.15282
AN6249	rcnA			0.0935171	1.43428	-0.000591725	1.47311	3.87679	0.919375
AN6820	hk-8-3			3.58275	-0.443233	-0.16874	0.568759	0.552803	0.494146
AN7661				0.569837	0.384607	-2.90228	1.09685	1.08432	-2.75271
AN7698	shoA			-0.393956	0.0664755	-2.78325	-0.613664	0.15546	-1.77394
AN7945	hk2			3.60603	0.0828579	-0.504426	0.0513489	0.0945112	-0.0203102
AN8269	hsp90			1.04107	2.11455	0.979345	1.95756	3.02119	2.10585
	Frequency in the up-regulated gene group:			11/636	7/686	3/493	7/546	5/504	2/449
	Background frequency			40/10390
	Significant enrichment in the studied gene group in compare to the background frequency (Fisher's exact test, p<0.05):
				YES	YES	NO	YES	YES	NO
	Significant difference between the DatfA and the appropriate control strain (Fisher's exact test, p<0.05):
							NO	NO	NO
	Frequency in the down-regulated gene group:			11/653	9/645	6/357	1/557	5/638	4/525
	Background frequency			40/10390
	Significant enrichment in the studied gene group in compare to the background frequency (Fisher's exact test, p<0.05):
				YES	YES	YES	NO	NO	NO
	Significant difference between the DatfA and the appropriate control strain (Fisher's exact test, p<0.05):
							YES	NO	NO
